# Supplementary material for: Differentially CTCF-Binding Sites in Cattle Rumen Tissue during Weaning
Source: MDPI journal article supplement (doi:10.3390/ijms23169070), 2022-08-13
Supplement: s1 [file s1]

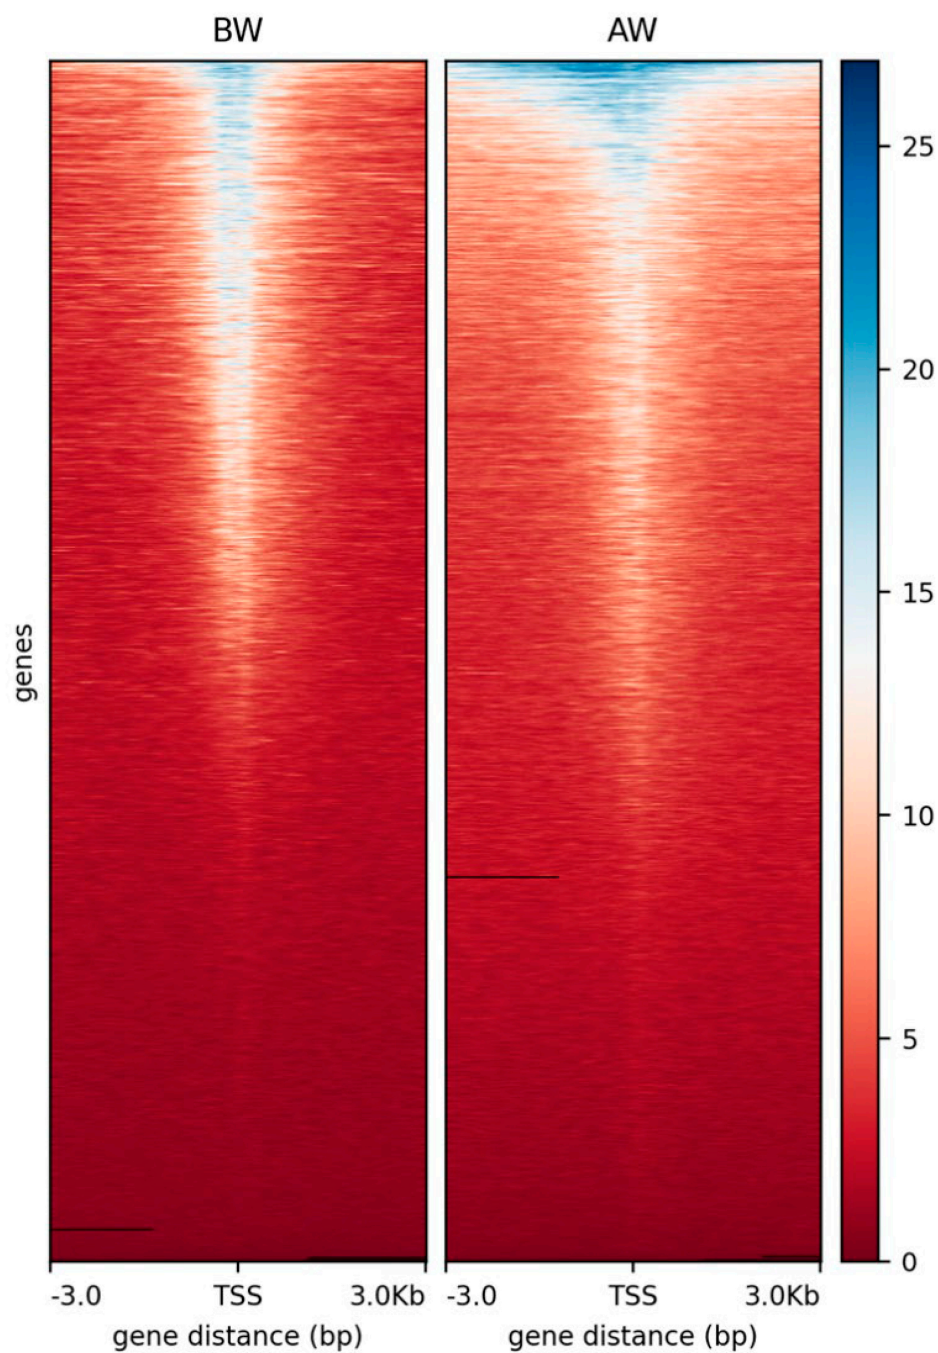

**Figure S1.** Heatmap profile of CTCF peaks relative to the transcription start sites (TSS) considering a  $\pm 3$  kb region for each pool with two samples each (considering chromosomes 1–29). Blue color intensity reflects the level of peak enrichment, and black lines are missing data. BW: before weaning. AW: after weaning.

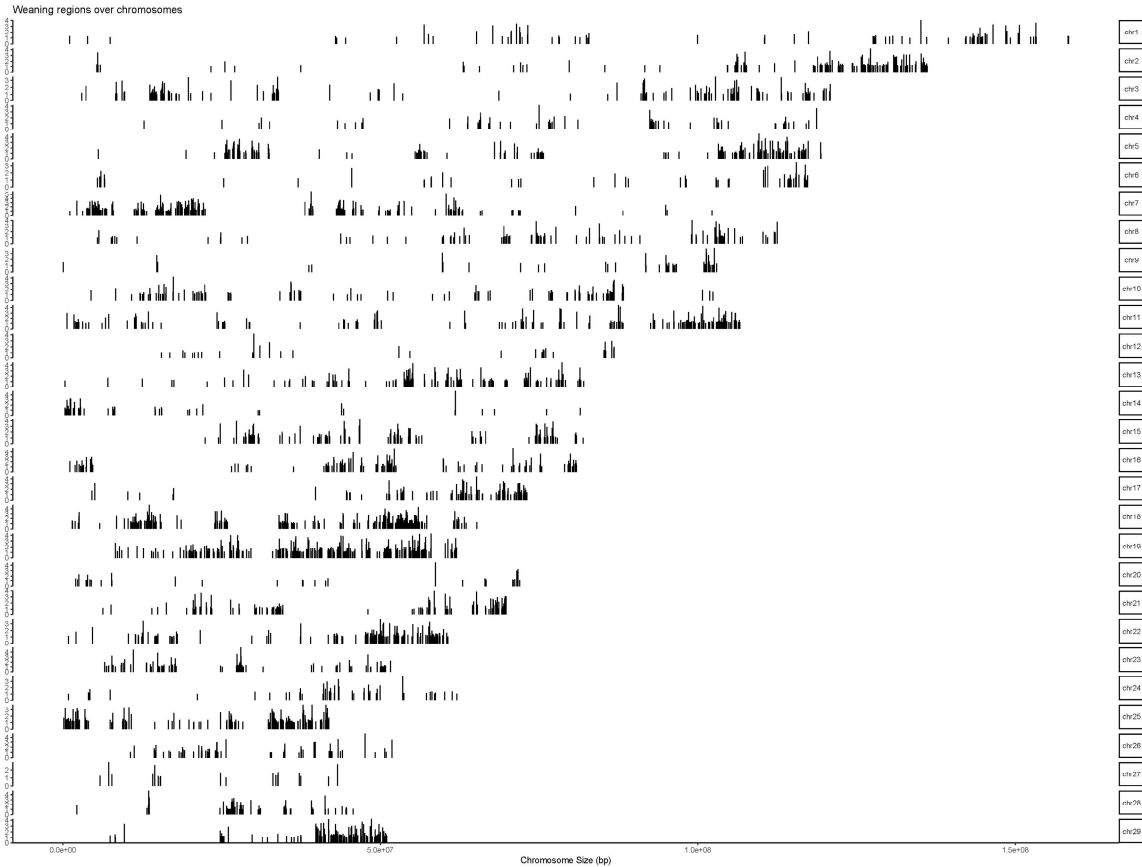

**Figure S2.** Chromosomal distribution of 7401 differentially CTCF-binding sites after weaning (considering bovine chromosomes 1–29).

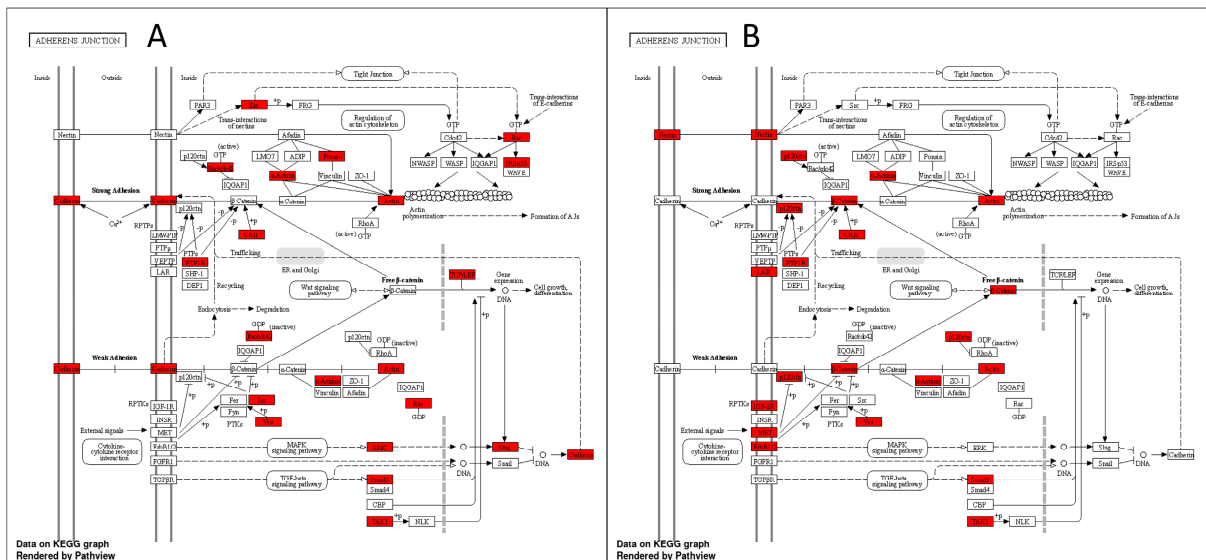

**Figure S3.** KEGG adherens junction pathway obtained from the (A) induced and (B) repressed differentially CTCF-binding sites (DCBS). Genes from the DCBS are highlighted in red.

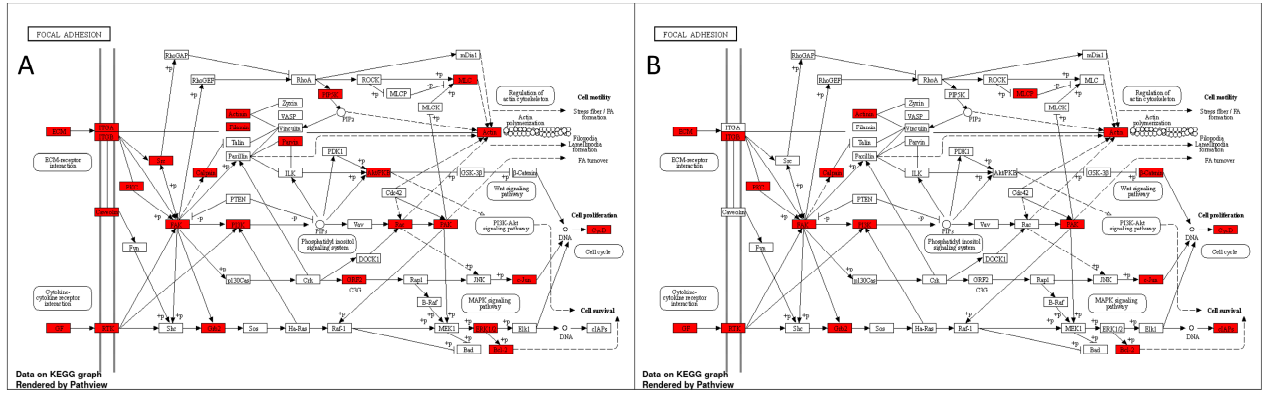

**Figure S4.** KEGG focal adhesion pathway obtained from the (A) induced and (B) repressed differentially CTCF-binding sites (DCBS). Genes from the DCBS are highlighted in red.

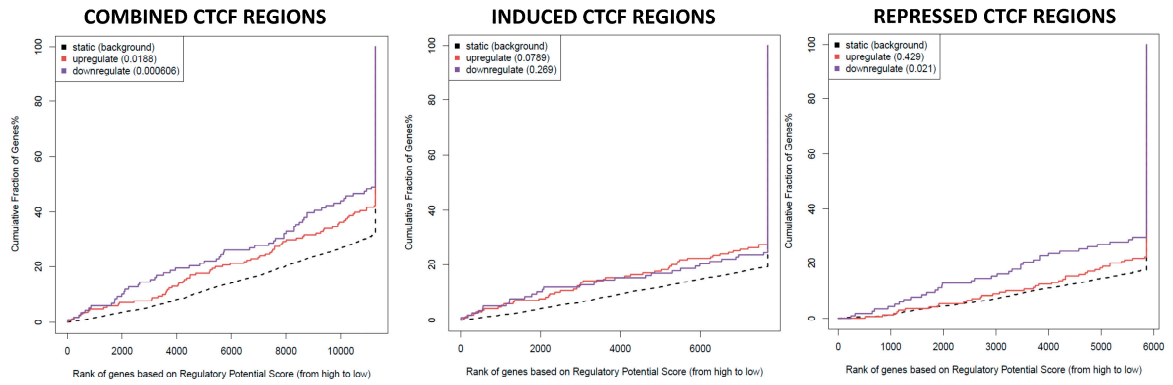

**Figure S5.** BETA activating and repressive function prediction of differentially CTCF-binding sites. The red line represents the up-regulated genes, the purple line represents the down-regulated genes, and the dashed line represents background genes with no differentially expressed genes. The  $p$ -values (inside the box) represent the significance of the difference between the up/down groups compared with the background genes by the Kolmogorov-Smirnov test.

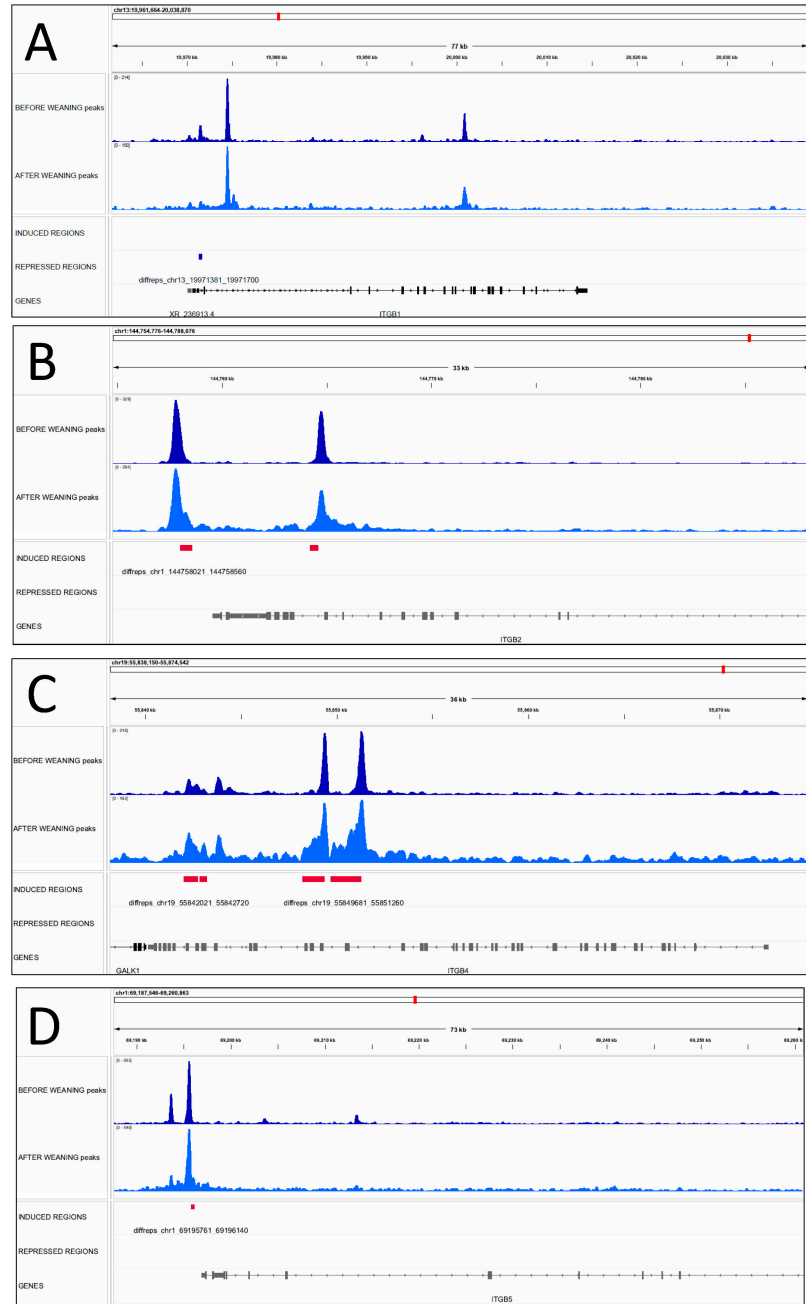

**Figure S6.** Integrative genomics viewer (IGV) screenshot of CTCF peaks (BW and AW) and the induced and repressed differentially CTCF-binding sites after weaning for the (A) *ITGB1* gene, (B) *ITGB2* gene, (C) *ITGB4* gene, and (D) *ITGB5* gene. The X-axis represents the chromosomal location with the size bar given in kb.

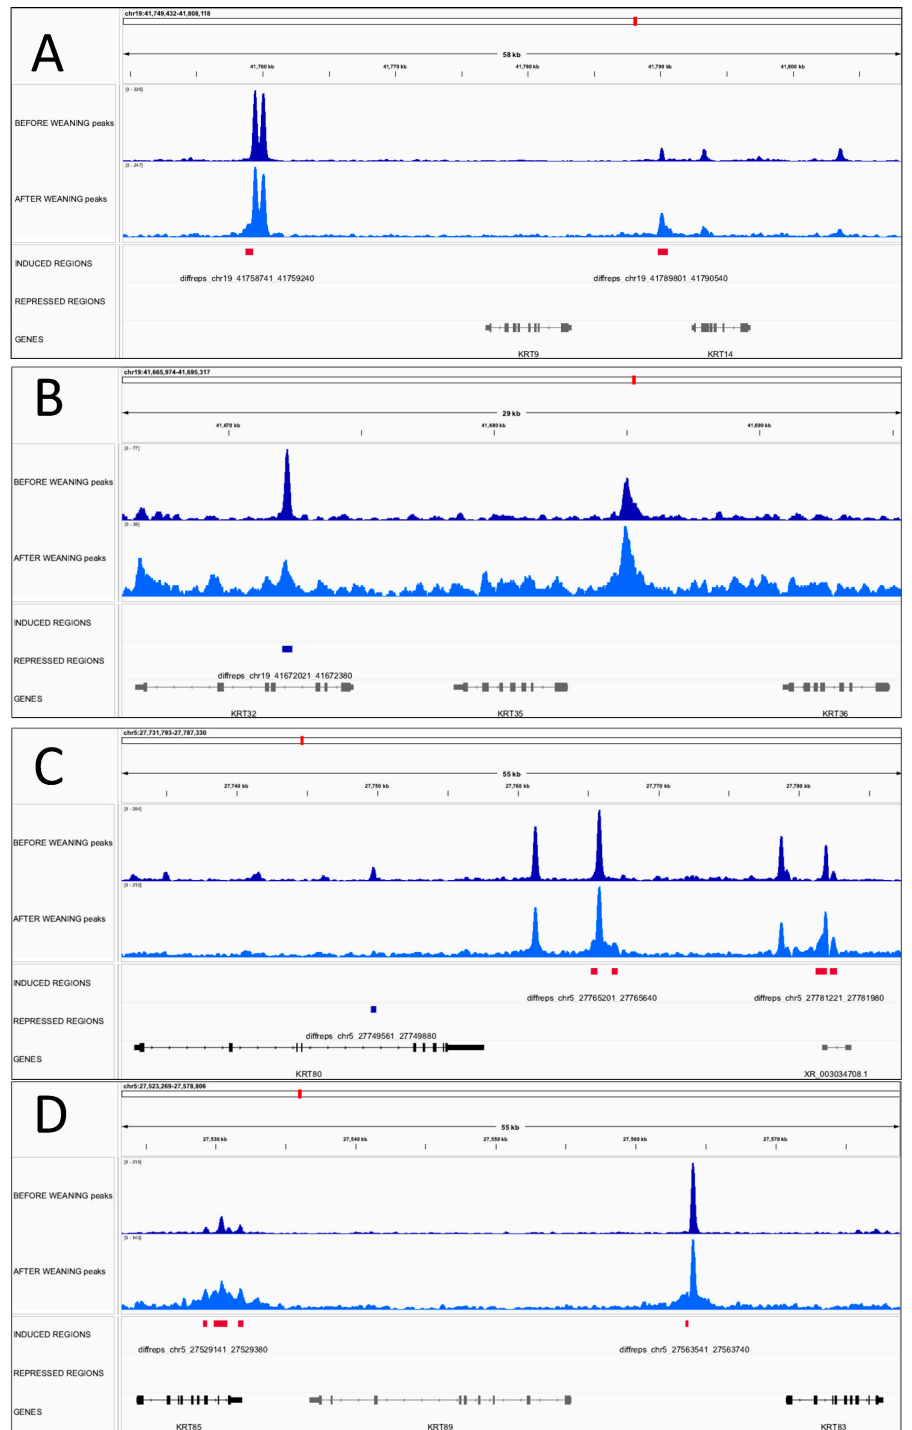

**Figure S7.** Integrative genomics viewer (IGV) screenshot of CTCF peaks (BW and AW) and the induced and repressed differentially CTCF-binding sites after weaning for the *keratin* genes - (A) *KRT9* and *KRT14*, (B) *KRT32*, *KRT35*, and *KRT36*, (C) *KRT80*, and (D) *KRT83*, *KRT85*, and *KRT89* genes. The X-axis represents the chromosomal location with the size bar given in kb.
