# Supplementary material for: Differentially CTCF-Binding Sites in Cattle Rumen Tissue during Weaning
Source: Int J Mol Sci. 2022 Aug 13;23(16):9070. doi: 10.3390/ijms23169070 (PMC9408924; doi:10.3390/ijms23169070)
Supplement: Supplementary file 1 [file ijms-23-09070-s001.zip › Supplementary Tables.xlsx]

## Sheet: TableS1
Table S1: Merged peaks information from the weaning condition (after weaning vs. before weaning), and differentially CTCF binding regions that overlapped with the merged peaks (FDR < 0.01 and -1 < log2FC >1).
CTCF-peaks					Differentially CTCF Regions
chr	star	end	AW	BW	chr	star	end	diffrep ID	log2FC	P-value	FDR
10	68006067	68006254		Before Weaning
27	33869085	33869634	After Weaning	Before Weaning
7	51795222	51795843	After Weaning	Before Weaning
13	56944391	56944828	After Weaning	Before Weaning	13	56944761	56945060	diffreps_chr13_56944761_56945060	1.03	0.000529053	0.00313655
3	89608485	89608880		Before Weaning
8	101337043	101337457		Before Weaning
7	95261252	95261657		Before Weaning
26	43168842	43169382	After Weaning	Before Weaning
13	69344220	69344457		Before Weaning
13	28299007	28299194		Before Weaning
21	27862356	27862700	After Weaning	Before Weaning
19	61845092	61845365		Before Weaning
15	75616913	75617489		Before Weaning
2	65311858	65312457	After Weaning	Before Weaning
20	20734883	20735386	After Weaning	Before Weaning
6	110777641	110777829		Before Weaning
4	99166119	99166589	After Weaning	Before Weaning
16	51330202	51330589	After Weaning	Before Weaning	16	51330201	51330640	diffreps_chr16_51330201_51330640	-1.1	1.50688e-05	0.000129979
1	58483520	58483835		Before Weaning
6	88716543	88717213	After Weaning	Before Weaning
4	52300097	52300529	After Weaning	Before Weaning	4	52300141	52300540	diffreps_chr4_52300141_52300540	-1.02	1.5359e-05	0.000132125
22	59801464	59802009	After Weaning	Before Weaning
11	31970565	31970993		Before Weaning	11	31970581	31970960	diffreps_chr11_31970581_31970960	-2.07	8.96801e-10	1.64654e-08
11	68424523	68424796		Before Weaning
3	14008845	14010024	After Weaning	Before Weaning	3	14008841	14009560	diffreps_chr3_14008841_14009560	1.34	9.32587e-15	3.46606e-13
14	80280985	80281377	After Weaning	Before Weaning
13	27421880	27422158	After Weaning	Before Weaning
27	6754770	6755015	After Weaning	Before Weaning
11	65929622	65930145	After Weaning	Before Weaning	11	65929601	65930040	diffreps_chr11_65929601_65930040	-1.07	9.0555e-06	8.17869e-05
18	35411992	35412721	After Weaning	Before Weaning	18	35412001	35412320	diffreps_chr18_35412001_35412320	1.08	5.97689e-05	0.000450396
22	54287603	54288787	After Weaning	Before Weaning
10	37066619	37067519	After Weaning	Before Weaning
20	25970151	25970360	After Weaning
24	1074080	1074269		Before Weaning
21	5886275	5886486		Before Weaning
18	51029968	51030256	After Weaning	Before Weaning
3	89475178	89475456	After Weaning
7	71935694	71936031		Before Weaning
6	108863828	108864228	After Weaning
8	75354515	75354702		Before Weaning
27	37031141	37031651		Before Weaning
16	41152959	41153156		Before Weaning
7	46797959	46798278		Before Weaning
16	55237540	55238249		Before Weaning
6	116663891	116664078		Before Weaning
15	65848014	65848381	After Weaning	Before Weaning
1	143672422	143672731		Before Weaning
27	44353616	44354322	After Weaning	Before Weaning
10	4612892	4613177		Before Weaning
5	19133070	19133400		Before Weaning
3	8280071	8280816		Before Weaning
6	116623322	116623581		Before Weaning
2	133242990	133243177		Before Weaning
18	24070586	24071209	After Weaning	Before Weaning
24	46791768	46792514	After Weaning	Before Weaning
9	102304871	102305088		Before Weaning
15	38544809	38545013		Before Weaning
12	23376472	23377133	After Weaning	Before Weaning
18	43154394	43154839	After Weaning
3	92369396	92369996	After Weaning	Before Weaning
2	90694494	90695085	After Weaning	Before Weaning
17	18062376	18062713		Before Weaning
7	11519299	11519944	After Weaning	Before Weaning
19	56103909	56104846	After Weaning	Before Weaning
7	38835346	38835791		Before Weaning
28	25778659	25779496	After Weaning	Before Weaning	28	25777661	25779380	diffreps_chr28_25777661_25779380	1.04	0	0
13	2377533	2377779		Before Weaning
23	20835085	20835434	After Weaning	Before Weaning
8	73879382	73879915	After Weaning	Before Weaning
22	3054824	3055011		Before Weaning
9	95997359	95997750	After Weaning	Before Weaning
11	106685192	106685379		Before Weaning
7	16973356	16973678		Before Weaning
22	52342986	52343173		Before Weaning
22	39226343	39226701		Before Weaning
25	16756316	16756775	After Weaning	Before Weaning
10	5109362	5109944	After Weaning	Before Weaning
27	16494771	16495171	After Weaning	Before Weaning
22	4775306	4775829	After Weaning	Before Weaning
11	92410135	92410528		Before Weaning
11	104080913	104081809	After Weaning	Before Weaning	11	104080881	104081260	diffreps_chr11_104080881_104081260	1.41	2.94799e-07	3.52717e-06
17	68243600	68244914	After Weaning	Before Weaning	17	68244161	68244940	diffreps_chr17_68244161_68244940	1.33	2.22045e-16	9.84376e-15
15	35118182	35118644	After Weaning	Before Weaning
6	114309338	114309676		Before Weaning
19	54043350	54043916	After Weaning	Before Weaning
22	21739285	21740388	After Weaning	Before Weaning
9	68094422	68094904	After Weaning	Before Weaning
14	36336799	36337188		Before Weaning	14	36336841	36337180	diffreps_chr14_36336841_36337180	-1.65	2.96082e-06	2.93217e-05
2	70984791	70986036	After Weaning	Before Weaning	2	70985401	70985700	diffreps_chr2_70985401_70985700	1.14	7.78935e-05	0.000570851
14	37166548	37166921	After Weaning	Before Weaning
28	39793682	39793883		Before Weaning
7	98518795	98519132		Before Weaning
13	67549547	67550004	After Weaning	Before Weaning
19	40580525	40580753		Before Weaning
21	42658284	42658977	After Weaning	Before Weaning
26	6959339	6959827		Before Weaning
4	111607349	111607849	After Weaning	Before Weaning
12	86344412	86344636	After Weaning
21	20634531	20634739	After Weaning
5	38554086	38554519	After Weaning	Before Weaning
23	17462429	17462896	After Weaning	Before Weaning
1	6133535	6133887	After Weaning	Before Weaning
5	38520406	38521041	After Weaning	Before Weaning
21	67752490	67752772	After Weaning		21	67752501	67752800	diffreps_chr21_67752501_67752800	2.66	5.12468e-12	1.32777e-10
2	13916488	13916940	After Weaning	Before Weaning	2	13916501	13916740	diffreps_chr2_13916501_13916740	-1.43	0.000419096	0.00255468
19	24637894	24638251	After Weaning	Before Weaning
15	53800616	53801408	After Weaning	Before Weaning
9	101996644	101996878	After Weaning
10	44659829	44660465	After Weaning	Before Weaning
11	27433967	27434361		Before Weaning
7	20312969	20313921	After Weaning	Before Weaning
17	71518018	71518820	After Weaning	Before Weaning
18	13490139	13490460		Before Weaning
19	42092869	42093215		Before Weaning
17	4341283	4341615		Before Weaning
6	30466085	30466453	After Weaning	Before Weaning	6	30466081	30466440	diffreps_chr6_30466081_30466440	-1.72	3.79799e-07	4.43399e-06
2	134867045	134867459		Before Weaning
11	44393220	44393981	After Weaning	Before Weaning
2	105962726	105963262		Before Weaning
10	13601323	13601646	After Weaning	Before Weaning
7	5497061	5497467	After Weaning	Before Weaning
21	33794360	33794826	After Weaning	Before Weaning
2	128789233	128789449		Before Weaning
7	16255229	16255512	After Weaning
19	52489977	52490185		Before Weaning
3	31997125	31997484	After Weaning	Before Weaning
7	15106291	15106478		Before Weaning
13	62376226	62376899	After Weaning	Before Weaning
12	34299893	34300566	After Weaning	Before Weaning
29	17467632	17468269	After Weaning	Before Weaning
6	23829435	23829824	After Weaning	Before Weaning	6	23829501	23829800	diffreps_chr6_23829501_23829800	-1.36	0.000152476	0.00104175
23	31779539	31779777		Before Weaning
15	81268067	81268817		Before Weaning
10	79944380	79944624		Before Weaning
18	25037324	25037636	After Weaning	Before Weaning
13	74587610	74588160	After Weaning	Before Weaning
21	58761794	58762250	After Weaning	Before Weaning
10	36863833	36864058		Before Weaning
2	129312772	129313225	After Weaning	Before Weaning	2	129312421	129312960	diffreps_chr2_129312421_129312960	1.01	1.10255e-08	1.70257e-07
10	16791299	16791599	After Weaning	Before Weaning
1	130660354	130660745	After Weaning	Before Weaning
8	82932440	82932697	After Weaning		8	82932421	82932700	diffreps_chr8_82932421_82932700	2.57	3.21724e-10	6.34561e-09
26	17482472	17482762	After Weaning
27	38084378	38084885	After Weaning	Before Weaning	27	38084601	38084860	diffreps_chr27_38084601_38084860	-2.47	9.02606e-08	1.18534e-06
15	46248977	46249287	After Weaning
5	60663899	60664112	After Weaning
13	44433838	44434032		Before Weaning
18	48596411	48596753		Before Weaning
18	16992113	16992575	After Weaning	Before Weaning
22	37421172	37421419	After Weaning
6	36254729	36255558	After Weaning	Before Weaning
5	60718567	60718937	After Weaning	Before Weaning
19	37824368	37824968	After Weaning	Before Weaning
10	35872954	35873535		Before Weaning
11	102258062	102259113	After Weaning	Before Weaning	11	102257981	102258900	diffreps_chr11_102257981_102258900	1.48	0	0
16	1346543	1346888		Before Weaning
22	33859385	33859572		Before Weaning
26	11078559	11079341	After Weaning	Before Weaning
19	33865120	33866310	After Weaning	Before Weaning	19	33864961	33865900	diffreps_chr19_33864961_33865900	1.27	0	0
15	41735575	41736973	After Weaning	Before Weaning
9	74536834	74537476	After Weaning	Before Weaning
3	26701265	26701639	After Weaning	Before Weaning
15	34379721	34380366	After Weaning	Before Weaning
11	92652783	92653081		Before Weaning
21	14969083	14969349		Before Weaning
19	20699986	20700654	After Weaning	Before Weaning
18	25779620	25779958	After Weaning	Before Weaning
4	80238634	80238908		Before Weaning
14	44817896	44818125	After Weaning
1	148495631	148496244		Before Weaning
2	5141359	5141619		Before Weaning
25	21102369	21102840	After Weaning	Before Weaning
17	2011118	2011371		Before Weaning
12	28495204	28495536	After Weaning	Before Weaning
16	20813131	20813541	After Weaning	Before Weaning	16	20813201	20813540	diffreps_chr16_20813201_20813540	-1.39	2.67074e-05	0.000217506
25	26248987	26249662	After Weaning	Before Weaning
26	14176850	14177202		Before Weaning
19	43795070	43795638	After Weaning	Before Weaning
13	19503898	19504149		Before Weaning
7	109676421	109676934	After Weaning
28	30571263	30571546		Before Weaning
7	43807619	43808391	After Weaning	Before Weaning
29	49388785	49389630	After Weaning	Before Weaning	29	49388901	49389600	diffreps_chr29_49388901_49389600	1.3	5.91793e-12	1.5189e-10
25	41765471	41766305	After Weaning	Before Weaning
11	69726497	69726698		Before Weaning
17	53127463	53127828	After Weaning	Before Weaning
2	125663312	125664054	After Weaning	Before Weaning
4	66530691	66530944	After Weaning
16	42897241	42897428		Before Weaning
23	34546436	34546633		Before Weaning
5	28445697	28445925	After Weaning
2	128220901	128221213		Before Weaning
9	13982785	13983280		Before Weaning
17	66743327	66743670		Before Weaning
1	116737439	116737808	After Weaning	Before Weaning
3	56535115	56535698		Before Weaning
10	102499884	102500278	After Weaning
10	80234739	80235229		Before Weaning
19	35907260	35908462	After Weaning	Before Weaning	19	35907181	35907800	diffreps_chr19_35907181_35907800	1.12	1.18421e-11	2.90315e-10
10	86204376	86205810	After Weaning	Before Weaning	10	86204321	86205760	diffreps_chr10_86204321_86205760	1.4	0	0
3	16252617	16253346	After Weaning	Before Weaning
1	71932620	71933184		Before Weaning	1	71932641	71932940	diffreps_chr1_71932641_71932940	-1.22	0.000335486	0.00210406
7	20806170	20806357		Before Weaning
1	83652634	83653018	After Weaning	Before Weaning
19	28447187	28447400		Before Weaning
9	102927420	102928120	After Weaning	Before Weaning
16	45561669	45561984	After Weaning
22	11606406	11607024	After Weaning	Before Weaning
20	28342267	28342583	After Weaning	Before Weaning
15	27146475	27146749		Before Weaning
15	53344210	53345125	After Weaning	Before Weaning
5	99782583	99783204	After Weaning	Before Weaning
15	7464490	7464907		Before Weaning
6	90840805	90841263	After Weaning	Before Weaning
3	120254112	120254434		Before Weaning
16	63632596	63633155	After Weaning	Before Weaning
10	65243069	65243646		Before Weaning
9	62337586	62337796		Before Weaning
9	19701592	19702481	After Weaning	Before Weaning
24	25594173	25595148	After Weaning	Before Weaning
18	65772549	65773112	After Weaning	Before Weaning
17	67244030	67244242		Before Weaning
11	26359704	26360026		Before Weaning
16	4361087	4362096	After Weaning	Before Weaning	16	4361761	4362100	diffreps_chr16_4361761_4362100	2.53	1.39788e-12	3.93473e-11
10	31482335	31482671		Before Weaning
12	32472987	32474134	After Weaning	Before Weaning
3	114536030	114536379	After Weaning	Before Weaning
1	95725291	95725499		Before Weaning
8	31430663	31431148	After Weaning	Before Weaning
9	87532474	87532704		Before Weaning
19	62578291	62579143	After Weaning	Before Weaning
9	73005324	73005832	After Weaning	Before Weaning
2	21711485	21712394	After Weaning	Before Weaning
19	56292315	56292709	After Weaning	Before Weaning
14	46212941	46213249		Before Weaning
3	16824492	16825107		Before Weaning
2	119803051	119803282		Before Weaning
1	113386472	113386979	After Weaning	Before Weaning
21	16326221	16326631	After Weaning	Before Weaning
19	29162110	29162625		Before Weaning	19	29162181	29162520	diffreps_chr19_29162181_29162520	-1.37	2.07837e-05	0.000173055
8	84508339	84508582		Before Weaning
14	32484124	32484558	After Weaning	Before Weaning	14	32484121	32484520	diffreps_chr14_32484121_32484520	-1.25	3.14943e-06	3.1077e-05
23	42870108	42870307		Before Weaning
7	95185627	95186779	After Weaning	Before Weaning	7	95185621	95186240	diffreps_chr7_95185621_95186240	1.2	9.28034e-11	1.99585e-09
23	18013442	18013767	After Weaning	Before Weaning
27	5520627	5520814		Before Weaning
13	16183590	16184173	After Weaning	Before Weaning
29	17852636	17852963		Before Weaning
19	19124330	19124723	After Weaning	Before Weaning
18	35977118	35977397		Before Weaning
29	43839532	43839887		Before Weaning
3	14811895	14812583	After Weaning	Before Weaning
7	31854401	31855044	After Weaning	Before Weaning
10	85610526	85611059	After Weaning	Before Weaning
2	17799061	17799359		Before Weaning
13	62454404	62454932	After Weaning	Before Weaning
1	139186329	139186561		Before Weaning
9	8816180	8816437	After Weaning
5	101320318	101320547		Before Weaning
10	85902117	85902351		Before Weaning
11	28452905	28453564	After Weaning	Before Weaning
2	96668488	96668871		Before Weaning
3	116783353	116783551		Before Weaning
12	20189472	20189877		Before Weaning	12	20189501	20189860	diffreps_chr12_20189501_20189860	-2.16	1.59082e-09	2.80702e-08
15	34330050	34330737		Before Weaning
1	74457419	74457632		Before Weaning
9	34477826	34478528	After Weaning	Before Weaning
27	36631228	36631792	After Weaning	Before Weaning
21	21456481	21456859		Before Weaning
10	67014244	67014950	After Weaning	Before Weaning	10	67014281	67014880	diffreps_chr10_67014281_67014880	-1.39	3.87246e-12	1.02767e-10
6	97248966	97249752	After Weaning	Before Weaning	6	97248981	97249440	diffreps_chr6_97248981_97249440	1.34	6.75838e-09	1.09003e-07
1	143860175	143860833	After Weaning	Before Weaning
19	52120371	52120820	After Weaning	Before Weaning
11	69424043	69424420		Before Weaning
5	87602640	87602916		Before Weaning
10	96740585	96740841		Before Weaning
22	55683787	55684072		Before Weaning
17	62749255	62750380	After Weaning	Before Weaning	17	62749261	62749840	diffreps_chr17_62749261_62749840	1.6	3.82028e-13	1.16855e-11
11	2557324	2557511		Before Weaning
7	86985415	86985725		Before Weaning
1	43178547	43178913		Before Weaning
24	58768667	58768904		Before Weaning
5	67898493	67899255	After Weaning	Before Weaning	5	67898521	67899020	diffreps_chr5_67898521_67899020	-1.09	1.08412e-06	1.16332e-05
8	23961213	23961457		Before Weaning
14	30162420	30162607		Before Weaning
13	40817486	40818279	After Weaning	Before Weaning
2	120848891	120849367		Before Weaning
16	43110387	43110864	After Weaning	Before Weaning
11	13347505	13348171	After Weaning	Before Weaning
1	97350765	97351359	After Weaning	Before Weaning
27	40364128	40364518		Before Weaning	27	40364221	40364500	diffreps_chr27_40364221_40364500	-1.79	6.39905e-06	5.94207e-05
28	19054149	19054336		Before Weaning
21	23428324	23428595		Before Weaning
17	51829587	51830086	After Weaning	Before Weaning
5	26619866	26620282	After Weaning	Before Weaning
15	76577779	76578792	After Weaning	Before Weaning
13	48381667	48382021		Before Weaning
4	113865864	113866060	After Weaning
11	71834970	71835270		Before Weaning
11	4663488	4663719	After Weaning
3	8337423	8338063	After Weaning	Before Weaning
10	86835464	86835871	After Weaning	Before Weaning
11	73066312	73066752	After Weaning	Before Weaning
28	26443646	26444405	After Weaning	Before Weaning	28	26443941	26444440	diffreps_chr28_26443941_26444440	1.13	1.78307e-10	3.65129e-09
21	21869689	21870028	After Weaning
10	61598380	61598633		Before Weaning
11	50046619	50046888		Before Weaning
14	1114749	1115092		Before Weaning
5	57237358	57237663		Before Weaning
13	61168624	61168845		Before Weaning
1	52823902	52824148		Before Weaning
14	12586651	12587025		Before Weaning
29	36974881	36975875	After Weaning	Before Weaning
2	104011459	104011665		Before Weaning
26	47657694	47658013		Before Weaning	26	47657681	47658060	diffreps_chr26_47657681_47658060	-1.37	9.08941e-06	8.19902e-05
13	44449980	44450178	After Weaning
6	67834546	67835125	After Weaning	Before Weaning
10	69599530	69599718		Before Weaning
18	12631393	12631655		Before Weaning
19	62987331	62987518		Before Weaning
25	9632100	9632711	After Weaning	Before Weaning
17	7829064	7829724	After Weaning	Before Weaning
22	11477873	11478060		Before Weaning
10	79679140	79680273	After Weaning	Before Weaning
6	100005457	100005903	After Weaning	Before Weaning	6	100005501	100005860	diffreps_chr6_100005501_100005860	-1.02	0.000496491	0.00296995
11	42938482	42938753		Before Weaning
5	103707377	103707824	After Weaning	Before Weaning
19	14386031	14386491	After Weaning	Before Weaning
22	25954233	25954426		Before Weaning
8	53748429	53748840	After Weaning	Before Weaning
7	20539387	20539612	After Weaning		7	20539241	20539780	diffreps_chr7_20539241_20539780	3.94	0	0
4	113811039	113811426	After Weaning
24	49088399	49088680	After Weaning
2	121785580	121785980	After Weaning	Before Weaning
2	94364017	94364294	After Weaning
16	42806312	42806593		Before Weaning
5	6594308	6594533		Before Weaning
14	74858676	74858891		Before Weaning
4	60373497	60373842	After Weaning	Before Weaning
15	5688036	5688862	After Weaning	Before Weaning
10	26412927	26414005		Before Weaning
2	80265122	80266142	After Weaning	Before Weaning
13	35516080	35516520		Before Weaning
4	112367142	112367479		Before Weaning
16	70757415	70757631	After Weaning
11	99624120	99625051	After Weaning	Before Weaning
26	24153948	24154384	After Weaning	Before Weaning
10	3933188	3933597	After Weaning	Before Weaning
4	116825530	116825810	After Weaning
4	89038035	89038285		Before Weaning
22	32471373	32471800	After Weaning	Before Weaning
2	24604373	24605231	After Weaning	Before Weaning
7	18590776	18590998		Before Weaning
16	51142006	51142218		Before Weaning
7	47390268	47390708	After Weaning	Before Weaning
13	38593194	38594084	After Weaning	Before Weaning
16	62147994	62148582	After Weaning	Before Weaning
10	91015483	91015768		Before Weaning
24	39308294	39308509	After Weaning
12	50305486	50305960	After Weaning	Before Weaning
22	57627298	57627966	After Weaning	Before Weaning
19	53460375	53460986	After Weaning	Before Weaning
5	67711953	67712403	After Weaning	Before Weaning
17	46976869	46977101	After Weaning
16	26205732	26206198	After Weaning	Before Weaning
7	38752085	38752748	After Weaning	Before Weaning
8	86013376	86014147	After Weaning	Before Weaning
22	40536016	40536253		Before Weaning
2	123134806	123135221	After Weaning	Before Weaning
6	85114767	85115636	After Weaning	Before Weaning
20	41657427	41657747		Before Weaning
15	65067964	65068392	After Weaning	Before Weaning
8	96968567	96968812	After Weaning	Before Weaning
2	119224398	119225351	After Weaning	Before Weaning
15	63180401	63180634		Before Weaning
7	45690501	45690832		Before Weaning
4	119071070	119071313		Before Weaning
24	57121232	57121422		Before Weaning
16	73948310	73948536		Before Weaning
25	3749229	3749487		Before Weaning
8	6836100	6836809	After Weaning	Before Weaning
1	70624293	70625178	After Weaning	Before Weaning
8	79523382	79524420	After Weaning	Before Weaning
5	105595707	105596514	After Weaning	Before Weaning	5	105596101	105596520	diffreps_chr5_105596101_105596520	-1.35	1.06085e-06	1.14074e-05
21	21078692	21078952		Before Weaning
7	73301503	73301792		Before Weaning
5	116735496	116735822		Before Weaning
11	97051115	97051341		Before Weaning
11	80507589	80508391	After Weaning	Before Weaning
5	23905369	23905921	After Weaning	Before Weaning
1	127085286	127085546		Before Weaning
14	21654850	21655134		Before Weaning
1	69494219	69494518		Before Weaning
7	49824878	49825962	After Weaning	Before Weaning
12	23022604	23023538	After Weaning	Before Weaning
25	36084352	36085215	After Weaning	Before Weaning	25	36084201	36084920	diffreps_chr25_36084201_36084920	1.19	2.22045e-16	9.84376e-15
15	81013602	81013855	After Weaning
11	21678890	21679413	After Weaning	Before Weaning
19	47762045	47762865	After Weaning	Before Weaning	19	47762021	47762400	diffreps_chr19_47762021_47762400	1.21	1.80485e-06	1.86184e-05
10	79255030	79256068	After Weaning	Before Weaning
25	90433	90722		Before Weaning
2	92585177	92585418		Before Weaning
7	95014812	95015072	After Weaning
12	14802983	14803170		Before Weaning
1	139411858	139412270	After Weaning	Before Weaning
21	20935209	20935809	After Weaning	Before Weaning
20	24198763	24199078		Before Weaning
16	38856669	38856888		Before Weaning
22	10960700	10960949		Before Weaning
13	37903174	37903492		Before Weaning
4	43249896	43251690	After Weaning	Before Weaning	4	43249861	43250720	diffreps_chr4_43249861_43250720	1.44	0	0
21	51925519	51925725		Before Weaning
18	11134630	11135089	After Weaning	Before Weaning
7	18352440	18352970	After Weaning	Before Weaning
24	41436711	41437553	After Weaning	Before Weaning	24	41436741	41437300	diffreps_chr24_41436741_41437300	-1.48	1.07593e-10	2.28631e-09
18	22821215	22821496		Before Weaning
5	27803146	27803452	After Weaning
10	65621653	65622350	After Weaning	Before Weaning
10	22341675	22342089	After Weaning		10	22341641	22341960	diffreps_chr10_22341641_22341960	2.85	2.44249e-14	8.66151e-13
24	37531245	37531703	After Weaning	Before Weaning
19	8707627	8708357		Before Weaning
20	7213643	7214012		Before Weaning
17	61405831	61406290	After Weaning	Before Weaning
8	30438484	30438756		Before Weaning
2	52776618	52776871		Before Weaning
5	84785832	84786140		Before Weaning
18	54925354	54926283	After Weaning	Before Weaning	18	54925621	54926360	diffreps_chr18_54925621_54926360	1.37	2.04281e-14	7.31532e-13
11	63627320	63627985	After Weaning	Before Weaning
4	12727954	12728150		Before Weaning
18	14496753	14496987		Before Weaning
14	60782601	60782926		Before Weaning
1	120197510	120197901	After Weaning	Before Weaning	1	120197581	120197860	diffreps_chr1_120197581_120197860	-1.47	9.15767e-05	0.00065908
8	42687309	42687507		Before Weaning
23	45155054	45156237	After Weaning	Before Weaning	23	45155221	45155740	diffreps_chr23_45155221_45155740	1.21	1.48014e-09	2.62139e-08
14	17347986	17348296	After Weaning	Before Weaning
9	62724708	62726061	After Weaning	Before Weaning
1	106133565	106134395	After Weaning	Before Weaning
14	30266324	30266586		Before Weaning
5	114861368	114861629		Before Weaning
11	78485620	78485949	After Weaning	Before Weaning
10	80373197	80373499		Before Weaning	10	80373201	80373520	diffreps_chr10_80373201_80373520	-1.15	0.000820876	0.00460627
7	60816628	60817217	After Weaning	Before Weaning
11	48886370	48886584		Before Weaning
17	4297487	4298322	After Weaning	Before Weaning
22	45218147	45218338		Before Weaning
3	33981509	33981883	After Weaning	Before Weaning
2	132129533	132129774	After Weaning		2	132128981	132130060	diffreps_chr2_132128981_132130060	2.26	0	0
22	53633800	53634072	After Weaning
15	43876419	43877290	After Weaning	Before Weaning
7	16967532	16967779		Before Weaning
23	7603776	7604304	After Weaning	Before Weaning
12	76776317	76776678	After Weaning	Before Weaning	12	76776301	76776700	diffreps_chr12_76776301_76776700	-1.26	2.32816e-06	2.35342e-05
6	11588758	11589399	After Weaning	Before Weaning
8	44209852	44210081	After Weaning
3	99725111	99725362	After Weaning
2	65455078	65455602		Before Weaning
14	45932253	45932454		Before Weaning
2	89399323	89399523		Before Weaning
13	4645567	4645756		Before Weaning
19	53783057	53783265		Before Weaning
10	70393032	70393585	After Weaning	Before Weaning
29	44484206	44485477	After Weaning	Before Weaning
6	40555320	40555742	After Weaning	Before Weaning
21	24724173	24724542		Before Weaning
29	8592400	8592626		Before Weaning
26	51744862	51745511	After Weaning	Before Weaning
4	67451161	67451545		Before Weaning
13	14749828	14750349	After Weaning	Before Weaning	13	14749841	14750340	diffreps_chr13_14749841_14750340	-1.12	7.29879e-09	1.16957e-07
11	32763536	32763931	After Weaning	Before Weaning
6	116894792	116894995	After Weaning
6	106776364	106776607		Before Weaning
23	52351766	52352046		Before Weaning
5	31053717	31054783	After Weaning	Before Weaning	5	31053721	31054180	diffreps_chr5_31053721_31054180	-1.43	6.92709e-09	1.11302e-07
16	29705710	29706045		Before Weaning
23	15583714	15583922		Before Weaning
20	31431133	31431367		Before Weaning
29	9240271	9240489		Before Weaning
22	10126824	10127036		Before Weaning
7	14663522	14663709		Before Weaning
12	17374952	17375274	After Weaning	Before Weaning
5	101606311	101606733	After Weaning	Before Weaning
8	99023034	99023306		Before Weaning
18	51021933	51022245		Before Weaning
13	70304544	70305569	After Weaning	Before Weaning
11	98436534	98436779		Before Weaning
12	23540882	23541298	After Weaning	Before Weaning
7	16572375	16572794	After Weaning	Before Weaning
2	8830311	8831035	After Weaning	Before Weaning
3	29450136	29450631	After Weaning	Before Weaning
7	82837765	82837996		Before Weaning
26	43348919	43350162	After Weaning	Before Weaning	26	43348841	43349400	diffreps_chr26_43348841_43349400	1.33	2.2653e-12	6.20966e-11
16	75119875	75120989	After Weaning	Before Weaning	16	75120181	75120700	diffreps_chr16_75120181_75120700	1.36	1.03056e-10	2.19905e-09
13	53570556	53571061	After Weaning	Before Weaning
24	1899772	1900149	After Weaning	Before Weaning	24	1899781	1900120	diffreps_chr24_1899781_1900120	-1.28	0.000132968	0.0009193
24	61587083	61587739	After Weaning	Before Weaning
21	47399534	47400066		Before Weaning
29	41164454	41165031	After Weaning	Before Weaning
19	55214474	55214925		Before Weaning	19	55214501	55214940	diffreps_chr19_55214501_55214940	-1.05	2.01021e-05	0.000168192
28	41861124	41861681	After Weaning	Before Weaning
17	69533900	69534210	After Weaning	Before Weaning
5	16896794	16897551	After Weaning	Before Weaning	5	16896961	16897380	diffreps_chr5_16896961_16897380	-1.09	2.58754e-05	0.000211337
18	51722689	51723293	After Weaning	Before Weaning
19	27035552	27035841	After Weaning
23	9412400	9413061	After Weaning	Before Weaning
12	75178722	75178925		Before Weaning
2	29114609	29114971		Before Weaning
12	59916930	59917240		Before Weaning
22	32576411	32576764	After Weaning	Before Weaning
8	86503907	86504347		Before Weaning
8	39466293	39466617		Before Weaning
4	113985203	113985991	After Weaning	Before Weaning
25	35596512	35597381	After Weaning	Before Weaning	25	35596961	35597440	diffreps_chr25_35596961_35597440	1.17	6.01615e-08	8.15236e-07
24	49684517	49684818		Before Weaning
17	69132414	69132810		Before Weaning
1	64318370	64318689		Before Weaning
18	38165441	38166552	After Weaning	Before Weaning	18	38165641	38166520	diffreps_chr18_38165641_38166520	1.46	0	0
11	49374450	49375454	After Weaning	Before Weaning
24	33894823	33895018		Before Weaning
8	85440570	85441486	After Weaning	Before Weaning	8	85441161	85441360	diffreps_chr8_85441161_85441360	-1.42	0.000758369	0.00430314
3	115641164	115641405		Before Weaning
6	18284258	18284662		Before Weaning
10	50793564	50793861	After Weaning	Before Weaning
24	58608692	58609100	After Weaning	Before Weaning
12	32614830	32615041		Before Weaning
6	99535397	99535698		Before Weaning
8	101446374	101446611	After Weaning
15	58207055	58207830	After Weaning	Before Weaning
8	96971486	96971845		Before Weaning
27	23444280	23444467		Before Weaning
22	34098313	34098697	After Weaning	Before Weaning	22	34098341	34098680	diffreps_chr22_34098341_34098680	-1.23	0.000189526	0.00126079
7	53810704	53811742	After Weaning	Before Weaning
23	48457236	48457832		Before Weaning
3	19926759	19927031		Before Weaning
19	42251020	42251729	After Weaning	Before Weaning	19	42250941	42251260	diffreps_chr19_42250941_42251260	1.12	2.76341e-05	0.000224528
8	5276633	5277016	After Weaning	Before Weaning
10	65150664	65150903	After Weaning
18	22755552	22756097		Before Weaning
7	18415002	18415550	After Weaning	Before Weaning
17	70273598	70274334	After Weaning	Before Weaning
9	21724723	21724982		Before Weaning
13	69078128	69078315		Before Weaning
13	44543354	44543541		Before Weaning
25	1528491	1531007	After Weaning	Before Weaning	25	1528561	1531140	diffreps_chr25_1528561_1531140	1.22	0	0
20	31971404	31971634		Before Weaning
19	36026345	36026735		Before Weaning
23	31912386	31912674		Before Weaning
2	39801619	39802239		Before Weaning
7	6278345	6279404	After Weaning	Before Weaning	7	6278421	6278640	diffreps_chr7_6278421_6278640	1.67	1.96572e-05	0.000164967
21	66564827	66565780	After Weaning	Before Weaning	21	66565241	66565500	diffreps_chr21_66565241_66565500	1.57	7.80425e-06	7.13018e-05
16	42911958	42912203	After Weaning	Before Weaning
10	98201483	98201776		Before Weaning
11	6118658	6118845		Before Weaning
19	38655277	38655838	After Weaning	Before Weaning	19	38654841	38655500	diffreps_chr19_38654841_38655500	1.04	1.35713e-09	2.43051e-08
14	70329610	70329863	After Weaning	Before Weaning
6	23113355	23113668	After Weaning	Before Weaning
14	68336900	68337444	After Weaning	Before Weaning
3	20385176	20385827	After Weaning	Before Weaning
10	37398528	37399050	After Weaning	Before Weaning	10	37398421	37398860	diffreps_chr10_37398421_37398860	1.01	3.45765e-07	4.06768e-06
3	77564621	77565560	After Weaning	Before Weaning
4	32828050	32828246	After Weaning
10	76771771	76772768	After Weaning	Before Weaning	10	76771781	76772160	diffreps_chr10_76771781_76772160	1.3	4.48709e-07	5.17381e-06
13	23148528	23149149	After Weaning	Before Weaning
3	3765310	3765793	After Weaning	Before Weaning
19	53556263	53556821		Before Weaning
16	51125572	51125791	After Weaning
13	75357122	75357545	After Weaning	Before Weaning
11	72846537	72846724		Before Weaning
4	103761562	103761750		Before Weaning
8	82113807	82114150		Before Weaning
9	103594850	103595472	After Weaning	Before Weaning
8	98160554	98160834		Before Weaning
2	97031411	97032170	After Weaning	Before Weaning
19	9161067	9161817	After Weaning	Before Weaning
17	2910193	2910461		Before Weaning
5	45847075	45847991	After Weaning	Before Weaning
10	67641919	67642188	After Weaning
28	28133075	28134159	After Weaning	Before Weaning	28	28133361	28133920	diffreps_chr28_28133361_28133920	1.36	1.64229e-11	3.93789e-10
2	127910294	127910482		Before Weaning
17	28400621	28401083	After Weaning	Before Weaning
28	24241824	24242515	After Weaning	Before Weaning
9	28000	28223		Before Weaning
17	2408230	2408632	After Weaning	Before Weaning
16	28527392	28527591		Before Weaning
11	68611176	68612139	After Weaning	Before Weaning
12	30366802	30367031	After Weaning
16	37191067	37191751	After Weaning	Before Weaning
28	1607439	1607664	After Weaning
12	76469416	76470219	After Weaning	Before Weaning
3	102753766	102754099		Before Weaning
1	146845614	146845817	After Weaning
5	106854794	106855194		Before Weaning
11	63254883	63255390		Before Weaning
21	57621139	57621494	After Weaning	Before Weaning	21	57621081	57621600	diffreps_chr21_57621081_57621600	1.35	3.24407e-13	1.0015e-11
21	23432781	23433203	After Weaning	Before Weaning
29	31873321	31873682		Before Weaning
2	31429521	31430221	After Weaning	Before Weaning
17	33776293	33776590		Before Weaning
13	33130170	33130467		Before Weaning
28	27412192	27412379		Before Weaning
14	80900177	80900628	After Weaning	Before Weaning
21	15406804	15407485	After Weaning	Before Weaning
25	36092106	36092874	After Weaning	Before Weaning
5	46892579	46892952		Before Weaning
10	36864208	36864485	After Weaning	Before Weaning
28	7200208	7200439		Before Weaning
4	86251949	86252240		Before Weaning
10	53649112	53649394		Before Weaning
2	104849352	104849565		Before Weaning
23	9088388	9088684	After Weaning
14	49865991	49866397		Before Weaning
7	69342478	69343163	After Weaning	Before Weaning
24	47444990	47445804	After Weaning	Before Weaning	24	47445581	47445900	diffreps_chr24_47445581_47445900	1.95	1.62941e-08	2.44486e-07
26	42948721	42948908		Before Weaning
4	44482380	44482723	After Weaning	Before Weaning
23	16824754	16824948		Before Weaning
13	18215237	18215629	After Weaning	Before Weaning
19	40107918	40108135		Before Weaning
17	58912020	58912627	After Weaning	Before Weaning	17	58911881	58912240	diffreps_chr17_58911881_58912240	1.64	4.80383e-08	6.60781e-07
6	37300534	37301241	After Weaning	Before Weaning
19	45220680	45221265	After Weaning	Before Weaning
28	25526063	25526754	After Weaning	Before Weaning
23	52100023	52100821	After Weaning	Before Weaning
11	48147079	48147370	After Weaning	Before Weaning
12	75167669	75167864		Before Weaning
5	114526382	114526758		Before Weaning
15	55650801	55651088	After Weaning	Before Weaning
11	78230714	78230982		Before Weaning
17	6096433	6096620		Before Weaning
10	8119034	8119462	After Weaning	Before Weaning	10	8119081	8119360	diffreps_chr10_8119081_8119360	-1.62	3.48485e-05	0.000276427
5	27587988	27588233		Before Weaning
19	12929760	12930074		Before Weaning
6	69477050	69477239		Before Weaning
8	47453302	47453790	After Weaning	Before Weaning
3	116029660	116029955	After Weaning	Before Weaning
3	84727092	84727365		Before Weaning
9	53125286	53125844		Before Weaning
5	27900985	27901172		Before Weaning
11	2400247	2400596	After Weaning	Before Weaning
10	66833951	66834357	After Weaning	Before Weaning
18	13357813	13358292	After Weaning	Before Weaning	18	13356601	13358500	diffreps_chr18_13356601_13358500	1.04	0	0
18	5459740	5459936	After Weaning
25	40966090	40966507		Before Weaning
2	44024100	44024474		Before Weaning
7	22051252	22051482		Before Weaning
1	149474577	149475250		Before Weaning
25	28073865	28074182	After Weaning
5	112205511	112205707	After Weaning
15	76514754	76515551	After Weaning	Before Weaning
6	99411357	99411613		Before Weaning
25	26140200	26140433	After Weaning
19	55243979	55245083	After Weaning	Before Weaning
19	43617223	43617609	After Weaning	Before Weaning
28	19703036	19703301		Before Weaning
19	35215086	35215376		Before Weaning
4	11830508	11830927	After Weaning	Before Weaning	4	11830501	11830840	diffreps_chr4_11830501_11830840	-1.14	0.000162069	0.00110179
23	14801008	14801352		Before Weaning
23	43969426	43969755		Before Weaning
3	116761564	116761910		Before Weaning	3	116761561	116761900	diffreps_chr3_116761561_116761900	-1.6	3.44627e-06	3.3702e-05
22	60403266	60404057	After Weaning	Before Weaning
19	47401086	47401413	After Weaning	Before Weaning
8	16838148	16838406	After Weaning
3	99487475	99487761		Before Weaning
19	25132261	25133149	After Weaning	Before Weaning
16	79604355	79605050	After Weaning	Before Weaning
7	18090906	18091273	After Weaning	Before Weaning
10	28299173	28299692	After Weaning	Before Weaning
12	19728355	19728711		Before Weaning
1	106625991	106626231		Before Weaning
28	3594553	3594859		Before Weaning
16	73871179	73871403		Before Weaning
12	52419263	52419861	After Weaning	Before Weaning
23	40057534	40057721		Before Weaning
6	14857482	14857694		Before Weaning
7	90126567	90127023	After Weaning	Before Weaning
7	6699686	6700197		Before Weaning
13	51425027	51425826	After Weaning	Before Weaning	13	51425501	51425860	diffreps_chr13_51425501_51425860	1.07	1.03981e-05	9.28608e-05
22	16819049	16819287	After Weaning
7	79964348	79964562	After Weaning
3	9918956	9919167		Before Weaning
2	109157974	109158270		Before Weaning
2	63288600	63288787		Before Weaning
11	95962838	95963132		Before Weaning
16	64744306	64744500		Before Weaning
23	4758014	4758275		Before Weaning
1	42523110	42523427	After Weaning
3	51501627	51502708	After Weaning	Before Weaning	3	51501681	51502380	diffreps_chr3_51501681_51502380	-1.27	2.22045e-16	9.84376e-15
18	10751229	10751457		Before Weaning
1	154558663	154558897		Before Weaning
5	28571195	28571425		Before Weaning
5	105782924	105783618	After Weaning	Before Weaning
4	85930451	85930674		Before Weaning
12	85264910	85265703	After Weaning	Before Weaning
10	49799387	49799648		Before Weaning
7	11690553	11691184	After Weaning	Before Weaning
19	33234845	33235043		Before Weaning
18	43861667	43862508	After Weaning	Before Weaning
9	60034410	60034649		Before Weaning
19	45664762	45664983	After Weaning
6	46227907	46228263	After Weaning	Before Weaning
2	25886010	25886233		Before Weaning
29	28241556	28241847	After Weaning	Before Weaning
9	62139845	62140286		Before Weaning
23	37854452	37855376	After Weaning	Before Weaning
1	83024141	83024579	After Weaning	Before Weaning
5	108121447	108121874	After Weaning	Before Weaning
5	29914102	29914480		Before Weaning
29	25683298	25684063	After Weaning	Before Weaning
16	1381692	1381969		Before Weaning
6	111703252	111703812	After Weaning	Before Weaning
5	98860261	98860552		Before Weaning
19	34069320	34069579		Before Weaning
10	1263109	1263515	After Weaning	Before Weaning
3	17112111	17112345		Before Weaning
7	7767080	7767368		Before Weaning
23	23307345	23307684	After Weaning	Before Weaning
8	17362659	17363091	After Weaning	Before Weaning
13	43883472	43884147	After Weaning	Before Weaning
19	41711269	41711509		Before Weaning
25	3720520	3720707		Before Weaning
4	117357333	117357658	After Weaning	Before Weaning
3	114938165	114938593		Before Weaning
28	8849173	8849360		Before Weaning
13	18680783	18681037		Before Weaning
27	37348185	37348399		Before Weaning
17	53358015	53358580		Before Weaning
8	79479922	79480312	After Weaning	Before Weaning
20	7979066	7979663	After Weaning	Before Weaning
24	35014990	35015352		Before Weaning
18	53272381	53272746		Before Weaning
22	49290337	49290635		Before Weaning
22	11003826	11004043		Before Weaning
10	80762906	80763211		Before Weaning
28	29664190	29664536	After Weaning	Before Weaning
27	36533952	36534458	After Weaning	Before Weaning
2	31019392	31019633		Before Weaning
12	47978170	47978405		Before Weaning
4	62716997	62717391	After Weaning	Before Weaning
14	24227005	24227235		Before Weaning
1	129773557	129774671	After Weaning	Before Weaning
29	26102709	26103555	After Weaning	Before Weaning
25	36418498	36419121	After Weaning	Before Weaning
11	3016995	3017396	After Weaning	Before Weaning
3	67784846	67785042	After Weaning
9	49291400	49292267	After Weaning	Before Weaning
29	45387593	45388364	After Weaning	Before Weaning
14	16112846	16113033		Before Weaning
1	562789	563165		Before Weaning
15	31113035	31113840	After Weaning	Before Weaning
16	43751823	43752019		Before Weaning
14	1052260	1053581	After Weaning	Before Weaning	14	1052601	1053120	diffreps_chr14_1052601_1053120	1.09	6.62104e-09	1.06855e-07
12	86595225	86595464		Before Weaning
29	17978835	17979581	After Weaning	Before Weaning
16	1058806	1059133		Before Weaning	16	1058761	1059140	diffreps_chr16_1058761_1059140	-2.22	7.52751e-11	1.64663e-09
11	10669673	10670224		Before Weaning
28	30969306	30970042	After Weaning	Before Weaning
24	30311928	30312296		Before Weaning
14	81692444	81692679		Before Weaning
20	31682357	31683144	After Weaning	Before Weaning
20	41738983	41739775	After Weaning	Before Weaning
26	48638354	48638682		Before Weaning
9	72233882	72234385	After Weaning	Before Weaning
2	39912576	39912824		Before Weaning
8	31945797	31946030		Before Weaning
23	7168739	7169254	After Weaning	Before Weaning
13	32079162	32079460		Before Weaning
12	55857754	55857959		Before Weaning
3	102200722	102200925		Before Weaning
24	3991321	3991525	After Weaning
13	32397500	32397687		Before Weaning
3	83317513	83317943	After Weaning	Before Weaning	3	83317561	83317960	diffreps_chr3_83317561_83317960	-1.27	5.05727e-06	4.79379e-05
25	20852803	20853359	After Weaning	Before Weaning
25	28356208	28356750	After Weaning	Before Weaning
14	10732488	10732816		Before Weaning
28	25014856	25015281		Before Weaning
8	84386326	84386546		Before Weaning
5	109120623	109120916		Before Weaning
3	83288182	83288692	After Weaning	Before Weaning
4	67123557	67123785		Before Weaning
10	76150754	76150988		Before Weaning
8	97813839	97814115		Before Weaning
7	32337848	32338172		Before Weaning
4	78407490	78407678		Before Weaning
5	90862196	90862533	After Weaning	Before Weaning
24	33435037	33435436		Before Weaning
1	154686770	154686957		Before Weaning
10	100978503	100978694		Before Weaning
25	36649489	36649828		Before Weaning
9	85722293	85722625		Before Weaning
26	19168384	19168885	After Weaning	Before Weaning
23	31099067	31099254		Before Weaning
9	25385369	25385767	After Weaning	Before Weaning	9	25385381	25385740	diffreps_chr9_25385381_25385740	-1.39	1.49822e-05	0.000129247
10	52210355	52210697		Before Weaning	10	52210321	52210740	diffreps_chr10_52210321_52210740	-1.16	8.32885e-06	7.56793e-05
11	26770940	26772479	After Weaning	Before Weaning
9	102079980	102080246		Before Weaning
5	100595100	100595353		Before Weaning
13	1652888	1653132		Before Weaning
16	59966310	59966512		Before Weaning
13	12397791	12398115		Before Weaning
16	51412364	51412826	After Weaning		16	51411721	51414240	diffreps_chr16_51411721_51414240	1.51	0	0
29	50921690	50922052		Before Weaning
25	2714403	2715105	After Weaning	Before Weaning
21	7465822	7466148	After Weaning	Before Weaning
10	11227955	11228830	After Weaning	Before Weaning
12	30933407	30933662		Before Weaning
4	51755515	51755904		Before Weaning
1	6811722	6811918	After Weaning
10	32674513	32674712		Before Weaning
9	90891523	90892282	After Weaning	Before Weaning
21	39231111	39231417		Before Weaning	21	39231121	39231420	diffreps_chr21_39231121_39231420	-1.68	1.66111e-05	0.000141529
8	74913963	74914253		Before Weaning
18	35447206	35447483		Before Weaning
11	11354896	11355890	After Weaning	Before Weaning
28	45020421	45021079	After Weaning	Before Weaning
19	26536748	26537544		Before Weaning
13	54327021	54328226	After Weaning	Before Weaning	13	54326441	54327220	diffreps_chr13_54326441_54327220	1.65	0	0
10	47357275	47358150	After Weaning	Before Weaning
23	4349127	4349432		Before Weaning
25	39398783	39399050		Before Weaning
13	65474959	65475318		Before Weaning
29	48705648	48706017		Before Weaning
2	62830658	62831250	After Weaning	Before Weaning
1	82406083	82406354	After Weaning
21	61611928	61612118		Before Weaning
8	52250705	52251024		Before Weaning
13	38267954	38268443	After Weaning	Before Weaning
17	9721993	9722240		Before Weaning
21	28963744	28964136	After Weaning	Before Weaning
8	22034800	22034987		Before Weaning
9	60797254	60797653	After Weaning	Before Weaning
19	23109221	23109660	After Weaning	Before Weaning
3	89607223	89607823		Before Weaning	3	89607181	89607600	diffreps_chr3_89607181_89607600	-1.6	5.55728e-09	9.09333e-08
18	54892797	54893241		Before Weaning
2	129929974	129930211	After Weaning		2	129929901	129930260	diffreps_chr2_129929901_129930260	1.9	2.25135e-09	3.89092e-08
10	37169667	37169961	After Weaning		10	37169761	37169960	diffreps_chr10_37169761_37169960	1.31	0.000518548	0.00308334
9	39444222	39444701	After Weaning
5	71523266	71523533		Before Weaning
21	14936526	14937065		Before Weaning
13	16577413	16577648		Before Weaning
11	11232557	11233421	After Weaning	Before Weaning
4	68094138	68094354	After Weaning
13	44774039	44774330	After Weaning
3	120262074	120262943		Before Weaning
20	21064967	21065235		Before Weaning
5	18397003	18397391		Before Weaning
5	8829163	8829817	After Weaning	Before Weaning
17	71734312	71735404	After Weaning	Before Weaning	17	71734181	71735500	diffreps_chr17_71734181_71735500	1.03	0	0
14	16730088	16731389	After Weaning	Before Weaning
16	4516363	4516787	After Weaning	Before Weaning
16	72423325	72423512		Before Weaning
26	20886246	20886433		Before Weaning
10	2819943	2820663	After Weaning	Before Weaning
1	57943778	57944394		Before Weaning
11	106109427	106109630	After Weaning
15	28827628	28828479	After Weaning	Before Weaning
26	39623171	39623647	After Weaning	Before Weaning
2	17550945	17551582	After Weaning	Before Weaning
23	50199425	50199670	After Weaning
12	25589760	25590054		Before Weaning
16	51231747	51232265	After Weaning		16	51231541	51232380	diffreps_chr16_51231541_51232380	2.12	0	0
28	2906853	2907074	After Weaning	Before Weaning
9	45142532	45143020	After Weaning	Before Weaning
4	93497501	93497900	After Weaning	Before Weaning
29	46916777	46917322		Before Weaning	29	46917081	46917320	diffreps_chr29_46917081_46917320	-1.55	0.000186068	0.00124059
25	26488129	26489151	After Weaning	Before Weaning	25	26488481	26489180	diffreps_chr25_26488481_26489180	2.31	0	0
22	22448587	22449072	After Weaning	Before Weaning
26	10161940	10162613	After Weaning	Before Weaning
25	13181785	13182405	After Weaning	Before Weaning
19	38631590	38632148	After Weaning	Before Weaning
15	55195341	55196230	After Weaning	Before Weaning
28	13414559	13414746		Before Weaning
25	22658207	22658438		Before Weaning
7	70369385	70369863		Before Weaning
3	117120989	117121697	After Weaning	Before Weaning	3	117121381	117122820	diffreps_chr3_117121381_117122820	1.25	0	0
2	119630641	119630844		Before Weaning
25	38323465	38324470	After Weaning	Before Weaning	25	38323421	38323880	diffreps_chr25_38323421_38323880	1.01	2.44633e-07	2.97585e-06
24	41135276	41135526		Before Weaning
11	78486472	78486842	After Weaning	Before Weaning
14	62801829	62802043		Before Weaning
13	50621669	50622150	After Weaning	Before Weaning
13	18219113	18219553	After Weaning	Before Weaning
4	113484695	113485467	After Weaning	Before Weaning	4	113484741	113485000	diffreps_chr4_113484741_113485000	1.04	0.00107979	0.00585901
10	15406566	15407179	After Weaning	Before Weaning	10	15406541	15407020	diffreps_chr10_15406541_15407020	-1.24	4.87825e-10	9.30465e-09
19	22515906	22516141		Before Weaning
15	35295015	35296141	After Weaning	Before Weaning
19	8422331	8423017	After Weaning	Before Weaning
10	67642386	67643166	After Weaning	Before Weaning
11	45698165	45698562	After Weaning	Before Weaning
8	28716118	28716449		Before Weaning
5	19009737	19009933	After Weaning
24	40385214	40385430		Before Weaning
25	13656588	13657079	After Weaning	Before Weaning
2	121201758	121202202	After Weaning	Before Weaning
18	24745916	24746494	After Weaning	Before Weaning
12	21284224	21284494	After Weaning
20	2109277	2110286	After Weaning	Before Weaning
17	57403927	57404141		Before Weaning
15	44251956	44252595	After Weaning	Before Weaning
4	118203601	118203834		Before Weaning
15	34618904	34619435	After Weaning	Before Weaning
11	102855255	102855821	After Weaning	Before Weaning
17	4992063	4992413		Before Weaning
12	85502730	85503086	After Weaning	Before Weaning
29	42965806	42967217	After Weaning	Before Weaning	29	42965701	42967220	diffreps_chr29_42965701_42967220	1.14	0	0
17	68785614	68786095	After Weaning	Before Weaning
14	47828459	47828651		Before Weaning
21	30803874	30804419	After Weaning	Before Weaning
25	27481244	27481899	After Weaning	Before Weaning
13	47310327	47310748	After Weaning	Before Weaning
7	96255191	96255648		Before Weaning
21	12488108	12488440	After Weaning
20	20417911	20418285	After Weaning
26	15595846	15596284	After Weaning	Before Weaning
19	39755446	39755633		Before Weaning
2	6288243	6288447		Before Weaning
19	54693334	54693843	After Weaning	Before Weaning	19	54692581	54694700	diffreps_chr19_54692581_54694700	1.49	0	0
23	27516338	27516714	After Weaning	Before Weaning
10	84116719	84117123		Before Weaning
7	36671561	36671796		Before Weaning
6	34317446	34318016	After Weaning	Before Weaning	6	34317561	34318000	diffreps_chr6_34317561_34318000	-1.05	3.16462e-06	3.11804e-05
4	42283470	42283934		Before Weaning	4	42283541	42283900	diffreps_chr4_42283541_42283900	-2.22	1.67177e-09	2.94147e-08
17	71668953	71669217		Before Weaning
20	51179259	51179547		Before Weaning
9	74250338	74251044	After Weaning	Before Weaning
8	80711451	80711975	After Weaning	Before Weaning
13	28262776	28263214	After Weaning	Before Weaning
11	44350380	44351793	After Weaning	Before Weaning	11	44351181	44351880	diffreps_chr11_44351181_44351880	1.69	0	0
23	52011394	52011720		Before Weaning
6	57073638	57073859		Before Weaning
7	12123209	12123601	After Weaning	Before Weaning
3	20360776	20362199	After Weaning	Before Weaning
5	37136685	37136938		Before Weaning
23	7147190	7147405	After Weaning
2	6975510	6976197	After Weaning	Before Weaning
5	30755944	30756652	After Weaning	Before Weaning	5	30756301	30756720	diffreps_chr5_30756301_30756720	1.16	4.26883e-08	5.93159e-07
2	61249448	61249924	After Weaning	Before Weaning
6	104259107	104259294		Before Weaning
9	77309132	77309531	After Weaning	Before Weaning
8	26460642	26461253	After Weaning	Before Weaning
6	89499184	89499428		Before Weaning
18	54096926	54097314	After Weaning	Before Weaning
3	8463949	8464432	After Weaning	Before Weaning
24	33057267	33058328	After Weaning	Before Weaning
19	45297775	45298453	After Weaning	Before Weaning	19	45297981	45298540	diffreps_chr19_45297981_45298540	-1.19	1.14776e-11	2.82011e-10
19	40048957	40049157	After Weaning		19	40048881	40049220	diffreps_chr19_40048881_40049220	2.91	3.10862e-15	1.23062e-13
28	24340370	24340867	After Weaning	Before Weaning
19	56178883	56179180	After Weaning		19	56178961	56179160	diffreps_chr19_56178961_56179160	4.22	2.56128e-12	6.94149e-11
5	9737466	9737920	After Weaning	Before Weaning	5	9737481	9737920	diffreps_chr5_9737481_9737920	-1.7	4.84692e-11	1.08379e-09
11	86315334	86315671	After Weaning	Before Weaning
4	49954801	49955679	After Weaning	Before Weaning
22	57254406	57254593		Before Weaning
15	52824975	52825620	After Weaning	Before Weaning
25	2018081	2018280	After Weaning
14	81630892	81631213		Before Weaning
16	41724249	41724446	After Weaning
10	25624136	25624803	After Weaning	Before Weaning
14	66246533	66246729	After Weaning
11	98776828	98777320	After Weaning	Before Weaning
6	19501521	19501748		Before Weaning
2	120920695	120920882		Before Weaning
5	87172190	87172510		Before Weaning
16	38818461	38818687		Before Weaning
11	86989321	86989747	After Weaning	Before Weaning
14	3242948	3243352	After Weaning	Before Weaning
19	57874933	57875244	After Weaning
2	93175082	93175286		Before Weaning
8	75433564	75434208	After Weaning	Before Weaning
13	48918502	48919053	After Weaning	Before Weaning
8	81719315	81719983	After Weaning	Before Weaning
22	29539924	29540312		Before Weaning	22	29539921	29540320	diffreps_chr22_29539921_29540320	-2.33	2.06875e-11	4.89454e-10
5	91878778	91879206	After Weaning	Before Weaning
19	56411100	56413198	After Weaning	Before Weaning
23	22372676	22373143	After Weaning	Before Weaning
21	29174597	29174960		Before Weaning
21	25084575	25085138	After Weaning	Before Weaning
8	48550387	48550829		Before Weaning
3	20182411	20183491	After Weaning	Before Weaning
5	97051084	97051854	After Weaning	Before Weaning
18	20919172	20919509		Before Weaning
3	76767768	76768314	After Weaning	Before Weaning	3	76767761	76768260	diffreps_chr3_76767761_76768260	-1.03	1.54069e-05	0.000132433
29	34826130	34826458		Before Weaning
23	10908718	10909023		Before Weaning	23	10908701	10909020	diffreps_chr23_10908701_10909020	-1.15	0.000476815	0.00286883
17	10478139	10478457	After Weaning	Before Weaning
17	40070614	40070880		Before Weaning
29	26045898	26047469	After Weaning	Before Weaning	29	26045841	26046560	diffreps_chr29_26045841_26046560	1.49	4.66294e-15	1.80214e-13
21	32949486	32950075	After Weaning	Before Weaning
25	34345018	34345284		Before Weaning
16	4423264	4423703	After Weaning	Before Weaning
17	63646739	63647123		Before Weaning
10	45158611	45158990	After Weaning
21	21145941	21146299		Before Weaning
9	89879929	89880429	After Weaning	Before Weaning
21	32098283	32099150	After Weaning	Before Weaning
3	102778428	102779119	After Weaning	Before Weaning	3	102778781	102779100	diffreps_chr3_102778781_102779100	1.04	4.3826e-05	0.000339823
27	16158354	16159114	After Weaning	Before Weaning
1	38558639	38558907		Before Weaning
9	39714483	39715108	After Weaning	Before Weaning
1	46001049	46002086	After Weaning	Before Weaning
14	69154915	69155111	After Weaning
10	72738468	72738783		Before Weaning
4	107609573	107610321	After Weaning	Before Weaning
10	9560252	9560997	After Weaning	Before Weaning
18	52519388	52519626		Before Weaning
17	46826199	46826532		Before Weaning
13	27129715	27130240		Before Weaning
29	26087003	26087911	After Weaning	Before Weaning
2	105112366	105112553		Before Weaning
11	99540363	99540605	After Weaning	Before Weaning
11	88636752	88636990		Before Weaning
15	39507540	39508037	After Weaning	Before Weaning
17	6701589	6701970	After Weaning	Before Weaning
16	1432109	1432352		Before Weaning
6	45178506	45178976	After Weaning	Before Weaning
12	24815096	24815402	After Weaning
9	23030609	23030955		Before Weaning
2	121392957	121393241		Before Weaning
3	116036574	116036831		Before Weaning
28	9690676	9691071	After Weaning	Before Weaning
21	56164664	56164929		Before Weaning
9	67891386	67892131	After Weaning	Before Weaning
2	105222916	105223552	After Weaning	Before Weaning
1	72952011	72952323		Before Weaning	1	72952021	72952340	diffreps_chr1_72952021_72952340	-2.31	1.10344e-09	2.0043e-08
25	2746548	2747168		Before Weaning
17	35016157	35016409		Before Weaning
10	58475958	58476605	After Weaning	Before Weaning
8	53720433	53720645		Before Weaning
23	41382982	41383183		Before Weaning
26	24126352	24126580		Before Weaning
11	58656665	58657025		Before Weaning
23	31436174	31436738	After Weaning	Before Weaning
5	55735615	55736092	After Weaning	Before Weaning
10	7523866	7524305	After Weaning	Before Weaning
18	35352508	35352794		Before Weaning	18	35352481	35352840	diffreps_chr18_35352481_35352840	-1.05	0.000499038	0.00298285
24	33217738	33218634	After Weaning	Before Weaning
4	77652099	77652505	After Weaning	Before Weaning
3	117166956	117167379		Before Weaning	3	117166941	117167280	diffreps_chr3_117166941_117167280	-1.97	1.05483e-08	1.63251e-07
8	78399929	78400221	After Weaning
18	48603512	48604449	After Weaning	Before Weaning
22	17774679	17775162	After Weaning	Before Weaning
21	56570256	56570532		Before Weaning
12	81564151	81564359		Before Weaning
1	51788380	51788827	After Weaning
11	29750788	29752009	After Weaning	Before Weaning
4	63819837	63820032		Before Weaning
24	48172996	48173405		Before Weaning
22	51293805	51294343		Before Weaning
8	44391456	44391643		Before Weaning
4	110396616	110396803		Before Weaning
24	61374708	61375223	After Weaning	Before Weaning
18	53507395	53507840	After Weaning	Before Weaning
18	38232976	38233163		Before Weaning
29	22667405	22667795	After Weaning	Before Weaning
9	99317838	99318034	After Weaning
28	15393771	15394024	After Weaning
6	44858787	44859052		Before Weaning
16	49362099	49362489	After Weaning	Before Weaning
16	71164710	71164976		Before Weaning
4	100994626	100994907		Before Weaning
23	9116241	9116636		Before Weaning
3	87513062	87513773	After Weaning	Before Weaning
28	2840935	2841422	After Weaning	Before Weaning
5	67641664	67642084		Before Weaning
6	98114555	98114829		Before Weaning
17	29100799	29100986		Before Weaning
15	30477239	30477576		Before Weaning
21	27041238	27041691	After Weaning	Before Weaning
10	58629502	58629695		Before Weaning
13	24164571	24165189	After Weaning	Before Weaning
25	26969809	26970795	After Weaning	Before Weaning
19	53802707	53803031		Before Weaning
1	135684604	135685169	After Weaning	Before Weaning
17	12760405	12760642		Before Weaning
13	69176693	69176995	After Weaning	Before Weaning
3	15663407	15664081	After Weaning	Before Weaning
7	4555023	4555273		Before Weaning
13	78683052	78683380		Before Weaning
19	11680592	11681634	After Weaning	Before Weaning	19	11679741	11681340	diffreps_chr19_11679741_11681340	1.35	0	0
17	52731332	52731932	After Weaning	Before Weaning
4	12474099	12474560	After Weaning	Before Weaning
19	19199864	19200225		Before Weaning
11	20926936	20927620	After Weaning	Before Weaning
23	47816167	47816814	After Weaning	Before Weaning
1	145747158	145747373		Before Weaning
26	18564724	18565260		Before Weaning
7	4759640	4760102	After Weaning	Before Weaning
26	30588499	30588920		Before Weaning
6	89847443	89847845	After Weaning	Before Weaning	6	89847421	89847860	diffreps_chr6_89847421_89847860	-1.03	3.16e-06	3.11412e-05
19	23073695	23074378	After Weaning	Before Weaning
3	120212099	120212286		Before Weaning
16	43975173	43975471		Before Weaning
2	61489290	61490172	After Weaning	Before Weaning
5	22477731	22478408	After Weaning	Before Weaning
28	1517148	1517641	After Weaning	Before Weaning
17	53588119	53588494	After Weaning	Before Weaning
7	53745638	53745889	After Weaning		7	53745601	53745960	diffreps_chr7_53745601_53745960	3.33	0	0
7	17071078	17071464		Before Weaning
11	71010462	71011000	After Weaning	Before Weaning	11	71010461	71010840	diffreps_chr11_71010461_71010840	-1.47	3.94289e-07	4.58986e-06
26	37083483	37083695		Before Weaning
11	11443057	11444249	After Weaning	Before Weaning	11	11442961	11444360	diffreps_chr11_11442961_11444360	1.27	0	0
10	45002124	45002311		Before Weaning
29	43939506	43940251	After Weaning	Before Weaning
24	60566008	60566841	After Weaning	Before Weaning
11	3708790	3709050		Before Weaning
19	26787913	26788308	After Weaning	Before Weaning
15	28033578	28033774	After Weaning
19	42300049	42300538	After Weaning	Before Weaning
10	67570820	67571007		Before Weaning
25	38320284	38320491		Before Weaning
8	75203435	75204137	After Weaning	Before Weaning
7	18387532	18387838		Before Weaning
2	73128741	73129191	After Weaning	Before Weaning
3	34331841	34333018	After Weaning	Before Weaning
20	3289629	3290605	After Weaning	Before Weaning
8	5868593	5869310	After Weaning	Before Weaning
1	129743479	129743819		Before Weaning
17	71328320	71328842	After Weaning	Before Weaning
26	37686248	37687046	After Weaning	Before Weaning
14	10501220	10501652	After Weaning	Before Weaning
13	6582757	6582944		Before Weaning
19	17788273	17788479		Before Weaning
3	17351056	17351435		Before Weaning
29	12086180	12086376		Before Weaning
25	4012160	4013691	After Weaning	Before Weaning	25	4012221	4013780	diffreps_chr25_4012221_4013780	1.18	0	0
3	5768904	5769107		Before Weaning
7	5235130	5236216	After Weaning	Before Weaning	7	5235401	5236360	diffreps_chr7_5235401_5236360	1.37	0	0
18	6548227	6548414		Before Weaning
18	45645131	45645658	After Weaning	Before Weaning
10	21372728	21373705	After Weaning	Before Weaning
1	107078671	107079359	After Weaning	Before Weaning
29	41350732	41351014		Before Weaning
2	121216046	121216244		Before Weaning
6	113837092	113837331		Before Weaning
3	56923478	56923978	After Weaning	Before Weaning
26	15829093	15829299	After Weaning	Before Weaning
25	40666468	40666698		Before Weaning
20	70473946	70474170	After Weaning
22	50662781	50663224		Before Weaning
15	80900135	80900857	After Weaning	Before Weaning
7	22029717	22029904		Before Weaning
20	36076046	36076713	After Weaning	Before Weaning
10	59889760	59890484		Before Weaning
25	41428281	41429355	After Weaning	Before Weaning	25	41428281	41428900	diffreps_chr25_41428281_41428900	1.39	5.77316e-15	2.20671e-13
1	130788325	130788763	After Weaning	Before Weaning	1	130788361	130788740	diffreps_chr1_130788361_130788740	-1.09	0.000220205	0.0014448
5	78797728	78798424	After Weaning	Before Weaning
2	20741629	20741980		Before Weaning
8	101081862	101082238	After Weaning
5	103358272	103359064	After Weaning	Before Weaning	5	103358601	103359100	diffreps_chr5_103358601_103359100	1.34	4.99593e-10	9.50779e-09
2	128868656	128869090	After Weaning	Before Weaning
7	6325502	6325854	After Weaning	Before Weaning
17	71364066	71364847	After Weaning	Before Weaning
13	60305853	60306257	After Weaning	Before Weaning
5	27370822	27371263	After Weaning	Before Weaning
4	36966811	36967010		Before Weaning
19	62252334	62252524		Before Weaning
9	34162170	34162625	After Weaning	Before Weaning
19	7114790	7115257		Before Weaning
15	51090291	51090603		Before Weaning
4	72137509	72137746		Before Weaning
14	22031737	22032134	After Weaning	Before Weaning
12	22914409	22914793		Before Weaning
4	119685621	119685846		Before Weaning
7	69257139	69257516	After Weaning	Before Weaning
24	37691355	37692410	After Weaning	Before Weaning	24	37692141	37692380	diffreps_chr24_37692141_37692380	1.03	0.000529053	0.00313655
4	117101660	117101976	After Weaning	Before Weaning
1	78080509	78080817	After Weaning	Before Weaning
24	54047556	54048106	After Weaning	Before Weaning
22	37532411	37532704		Before Weaning
4	49049253	49049440		Before Weaning
7	90792878	90793076		Before Weaning
3	7128140	7128416		Before Weaning
5	116067751	116067950	After Weaning
2	111705337	111705528		Before Weaning
18	53351587	53351817	After Weaning		18	53351541	53351820	diffreps_chr18_53351541_53351820	2.89	8.39051e-12	2.10345e-10
13	73322784	73323789	After Weaning	Before Weaning	13	73322841	73323040	diffreps_chr13_73322841_73323040	2.63	1.63146e-08	2.44486e-07
29	31637174	31637532		Before Weaning
3	17101951	17102303		Before Weaning	3	17101941	17102300	diffreps_chr3_17101941_17102300	-1.88	3.0524e-08	4.36248e-07
24	37636521	37637215	After Weaning	Before Weaning
24	56354543	56354808		Before Weaning
9	76363954	76364610	After Weaning	Before Weaning
5	87539619	87539962		Before Weaning
10	58381041	58381544	After Weaning	Before Weaning
14	26414577	26414874		Before Weaning
29	28573501	28573762	After Weaning
4	72331768	72332655		Before Weaning
7	18541358	18541986		Before Weaning
5	86159543	86159780		Before Weaning
3	99413611	99414056	After Weaning	Before Weaning
19	62208730	62208950		Before Weaning
8	59360880	59361891	After Weaning	Before Weaning
4	64266937	64267393	After Weaning	Before Weaning	4	64266961	64267400	diffreps_chr4_64266961_64267400	-1.04	3.1648e-06	3.11804e-05
13	12537618	12537897	After Weaning	Before Weaning
6	5455234	5455601	After Weaning	Before Weaning
20	7843707	7844420	After Weaning	Before Weaning
27	14020508	14020696		Before Weaning
5	104994155	104994417		Before Weaning
11	106941973	106942172		Before Weaning
10	72401887	72402537	After Weaning	Before Weaning
27	19173423	19173822	After Weaning	Before Weaning
13	46226526	46226960	After Weaning	Before Weaning
5	100313655	100314174	After Weaning	Before Weaning
10	34059960	34060546	After Weaning	Before Weaning
2	128610522	128610882	After Weaning	Before Weaning
19	47114323	47115552	After Weaning	Before Weaning	19	47114201	47114940	diffreps_chr19_47114201_47114940	1.12	1.04716e-12	2.99936e-11
5	39629754	39630123	After Weaning	Before Weaning	5	39629701	39630180	diffreps_chr5_39629701_39630180	-1.02	4.75577e-08	6.55347e-07
12	35549380	35549836	After Weaning	Before Weaning
4	113723159	113723431		Before Weaning
7	43964614	43965317	After Weaning	Before Weaning
6	93370558	93370766		Before Weaning
15	25069193	25069529		Before Weaning
9	69252434	69252621		Before Weaning
23	22263282	22263868	After Weaning	Before Weaning
5	103258531	103259598	After Weaning	Before Weaning	5	103258921	103259520	diffreps_chr5_103258921_103259520	1.45	3.33067e-15	1.31512e-13
24	39938167	39938388		Before Weaning
22	48939317	48939581	After Weaning		22	48938761	48939700	diffreps_chr22_48938761_48939700	1.01	0	0
20	9162425	9163019		Before Weaning
22	56834071	56834395	After Weaning	Before Weaning
15	66650756	66651335	After Weaning	Before Weaning
5	75787227	75787488		Before Weaning
14	25258853	25259242	After Weaning	Before Weaning
23	20136816	20137020	After Weaning
1	19550157	19550363		Before Weaning
23	31758966	31759504		Before Weaning
3	77813142	77813862	After Weaning	Before Weaning
29	47803486	47803699		Before Weaning
26	15294211	15294757	After Weaning	Before Weaning
13	81424333	81424785	After Weaning		13	81424441	81424860	diffreps_chr13_81424441_81424860	3.54	0	0
13	60665462	60665743	After Weaning	Before Weaning
23	43450412	43450644		Before Weaning
17	70169725	70170441	After Weaning	Before Weaning
24	48082270	48082653		Before Weaning
22	60538814	60539169		Before Weaning
20	10653755	10654795	After Weaning	Before Weaning
6	60543415	60544107	After Weaning	Before Weaning
29	48412287	48412898	After Weaning		29	48412121	48414520	diffreps_chr29_48412121_48414520	1.69	0	0
25	3238940	3239153	After Weaning	Before Weaning
7	12713878	12714092	After Weaning
3	109537134	109537687		Before Weaning
2	15645350	15645795	After Weaning	Before Weaning
4	114756613	114757179	After Weaning	Before Weaning
22	55833957	55834248		Before Weaning
13	67544895	67545150		Before Weaning
14	68054417	68054853	After Weaning	Before Weaning
13	19949635	19949843		Before Weaning
25	21205735	21205962		Before Weaning
7	26105941	26106146		Before Weaning
9	94801010	94801206	After Weaning
5	55148110	55148574	After Weaning	Before Weaning
4	44310147	44310645		Before Weaning
7	50892653	50892939		Before Weaning
26	40940609	40940900		Before Weaning
9	97031187	97031896	After Weaning	Before Weaning
23	28257817	28258285		Before Weaning
2	52373058	52373472		Before Weaning
10	85871555	85872081		Before Weaning
28	7137821	7138629	After Weaning	Before Weaning
22	11340790	11341159		Before Weaning
5	95627374	95628189	After Weaning	Before Weaning
2	124284237	124284572	After Weaning	Before Weaning
1	56409832	56410541	After Weaning	Before Weaning
1	72596958	72597377		Before Weaning
20	4716473	4717183	After Weaning	Before Weaning
10	80580733	80580920		Before Weaning
11	72551215	72551517	After Weaning		11	72551221	72551560	diffreps_chr11_72551221_72551560	1.46	1.10234e-06	1.18137e-05
25	26713330	26713686	After Weaning	Before Weaning
10	10190236	10190748	After Weaning	Before Weaning
22	31843440	31843788	After Weaning	Before Weaning
6	111714746	111715089	After Weaning	Before Weaning	6	111714761	111715080	diffreps_chr6_111714761_111715080	-1.56	1.25753e-05	0.000110033
7	46321698	46322216	After Weaning	Before Weaning
20	65368112	65368330		Before Weaning
27	16406161	16406478		Before Weaning
29	46035173	46035456	After Weaning
8	75737581	75737955	After Weaning	Before Weaning
3	58091722	58092063	After Weaning	Before Weaning
18	56169709	56170016	After Weaning
18	40626883	40627191		Before Weaning
5	115289424	115290260	After Weaning	Before Weaning
25	32877463	32877842	After Weaning	Before Weaning
21	35305707	35305894		Before Weaning
28	18052514	18053128	After Weaning	Before Weaning
26	51096989	51097252		Before Weaning
9	64169665	64170511	After Weaning	Before Weaning
6	5449029	5449286	After Weaning	Before Weaning
17	516859	517823	After Weaning	Before Weaning
29	1339774	1340177	After Weaning	Before Weaning
22	53277192	53277440		Before Weaning
19	22149890	22150092		Before Weaning
3	15615655	15617122		Before Weaning
15	39694187	39694398		Before Weaning
22	52123720	52124467	After Weaning	Before Weaning
12	5226084	5226447		Before Weaning
14	2931209	2931396		Before Weaning
9	83085531	83085854		Before Weaning
1	4191874	4192380		Before Weaning
19	40357783	40358400	After Weaning	Before Weaning
18	23860905	23861167	After Weaning	Before Weaning
10	25342751	25343271	After Weaning	Before Weaning
21	61194798	61195625	After Weaning	Before Weaning
16	56435915	56436914	After Weaning	Before Weaning
19	46330576	46330767		Before Weaning
9	28424761	28425464	After Weaning	Before Weaning
13	61563850	61564105	After Weaning
20	24585998	24586521	After Weaning	Before Weaning
10	25998305	25999667	After Weaning	Before Weaning	10	25998821	25999940	diffreps_chr10_25998821_25999940	1.29	0	0
10	20395982	20396366		Before Weaning	10	20395981	20396420	diffreps_chr10_20395981_20396420	-2.34	1.17684e-14	4.33178e-13
10	25676340	25676935	After Weaning	Before Weaning
15	52019083	52019508	After Weaning	Before Weaning
8	96612518	96612705		Before Weaning
18	9155601	9155788		Before Weaning
15	73872372	73872616		Before Weaning
4	47116275	47116736	After Weaning	Before Weaning
3	117933722	117933956		Before Weaning
7	6384615	6384829		Before Weaning
9	62649364	62649585		Before Weaning
3	90594921	90595120		Before Weaning
3	104940092	104940971	After Weaning	Before Weaning
6	93677118	93677686	After Weaning	Before Weaning
9	22094287	22094508		Before Weaning
27	14488672	14489183	After Weaning	Before Weaning
14	23417628	23417946		Before Weaning
26	8514584	8515068		Before Weaning
19	60596733	60597189	After Weaning	Before Weaning
1	1908444	1908850	After Weaning	Before Weaning
11	63379921	63380351	After Weaning	Before Weaning
7	107395364	107395551		Before Weaning
24	52564416	52564657		Before Weaning
14	947180	947402	After Weaning	Before Weaning
16	4526386	4526721	After Weaning	Before Weaning
16	42945447	42945875	After Weaning	Before Weaning
29	37251814	37252018		Before Weaning
15	36470539	36470885	After Weaning	Before Weaning
14	46413600	46414616	After Weaning	Before Weaning
2	5628516	5628920	After Weaning	Before Weaning
16	35913329	35914219	After Weaning	Before Weaning
25	32429610	32429797		Before Weaning
23	9859219	9859442		Before Weaning
14	69397405	69398025	After Weaning	Before Weaning
4	63678404	63678821	After Weaning	Before Weaning
18	55349762	55350358	After Weaning	Before Weaning
19	6535231	6535781	After Weaning	Before Weaning	19	6535281	6535740	diffreps_chr19_6535281_6535740	-1.3	3.53942e-08	4.98776e-07
5	5195529	5195820		Before Weaning
4	49215984	49216294	After Weaning	Before Weaning
17	10191831	10192067		Before Weaning
14	34120012	34120238	After Weaning
2	47657178	47657448		Before Weaning
3	35038344	35039063	After Weaning	Before Weaning
25	33349816	33350089		Before Weaning
14	62245447	62245751		Before Weaning
12	77499271	77499486		Before Weaning
25	1198361	1198702		Before Weaning
13	53978686	53978945		Before Weaning
11	87081369	87081556		Before Weaning
21	29331927	29332217		Before Weaning
8	6824293	6824687		Before Weaning
8	59976753	59976970	After Weaning
17	29874203	29875162	After Weaning	Before Weaning	17	29874661	29875220	diffreps_chr17_29874661_29875220	-1.29	9.34719e-12	2.32728e-10
19	26828824	26829264	After Weaning	Before Weaning
10	14151020	14151288		Before Weaning
8	81389775	81390250		Before Weaning
4	31242684	31243441	After Weaning	Before Weaning
19	28062028	28062424	After Weaning	Before Weaning
1	71978624	71978834		Before Weaning
3	17147193	17147630	After Weaning	Before Weaning
14	3940068	3940664	After Weaning	Before Weaning	14	3940321	3940540	diffreps_chr14_3940321_3940540	-1.43	0.000419096	0.00255468
11	72204054	72204396		Before Weaning
13	64244206	64244393		Before Weaning
5	105480899	105481853	After Weaning	Before Weaning	5	105481321	105481820	diffreps_chr5_105481321_105481820	1.13	2.08463e-09	3.61995e-08
14	60952407	60953080	After Weaning	Before Weaning
3	120385779	120386546	After Weaning	Before Weaning
12	28672597	28673436	After Weaning	Before Weaning
11	63379637	63379825		Before Weaning
23	41660613	41660907	After Weaning	Before Weaning
5	34518581	34518971	After Weaning	Before Weaning	5	34518481	34519040	diffreps_chr5_34518481_34519040	-1.57	0	0
7	4450873	4451287	After Weaning	Before Weaning
18	43570201	43570920		Before Weaning
14	76120394	76120783		Before Weaning
29	45212698	45213193	After Weaning	Before Weaning
2	107095773	107096084		Before Weaning
17	61352042	61352764	After Weaning	Before Weaning
5	42486876	42487368	After Weaning	Before Weaning
27	37015534	37015823	After Weaning
14	36381847	36382750	After Weaning	Before Weaning
27	32674961	32675610		Before Weaning
5	34209808	34210397	After Weaning	Before Weaning
10	15651767	15651954		Before Weaning
4	52224376	52225281	After Weaning	Before Weaning
22	21849281	21849468		Before Weaning
21	69046990	69047216		Before Weaning
22	35214358	35215534	After Weaning	Before Weaning
1	145609734	145610028		Before Weaning
19	33510682	33510869		Before Weaning
7	6922083	6922469		Before Weaning
7	46494362	46494720		Before Weaning
3	92798468	92798716		Before Weaning
22	58145113	58146407	After Weaning	Before Weaning	22	58145001	58146000	diffreps_chr22_58145001_58146000	1.44	0	0
1	78537173	78537413		Before Weaning
1	99623501	99623704		Before Weaning
29	32694358	32694567		Before Weaning
3	39379364	39379611		Before Weaning
13	75584937	75585134		Before Weaning
22	59856883	59857792	After Weaning	Before Weaning
8	67438038	67438366		Before Weaning
24	2038642	2038893		Before Weaning
3	89601815	89602281	After Weaning	Before Weaning
2	72684253	72684780		Before Weaning
1	107330039	107330347		Before Weaning
3	53299678	53299875		Before Weaning
10	334588	334782		Before Weaning
4	70678495	70678869	After Weaning	Before Weaning
3	87279711	87281140	After Weaning	Before Weaning	3	87279761	87280200	diffreps_chr3_87279761_87280200	2.71	0	0
3	42437111	42437520	After Weaning	Before Weaning
3	29578588	29579884	After Weaning	Before Weaning	3	29578781	29579300	diffreps_chr3_29578781_29579300	-1.45	7.44097e-11	1.62863e-09
21	16615249	16615888	After Weaning	Before Weaning
4	93612474	93612741	After Weaning
15	21244452	21244711		Before Weaning
18	63493727	63495131	After Weaning	Before Weaning	18	63494501	63495160	diffreps_chr18_63494501_63495160	1.05	7.80953e-12	1.96617e-10
13	5467141	5467492		Before Weaning	13	5467201	5467460	diffreps_chr13_5467201_5467460	-2.23	1.44273e-07	1.82575e-06
5	56999445	57000476	After Weaning	Before Weaning	5	56999381	56999960	diffreps_chr5_56999381_56999960	1.36	1.77636e-15	7.24568e-14
23	42904592	42904795		Before Weaning
10	37877368	37877690	After Weaning	Before Weaning
23	2945440	2946044	After Weaning	Before Weaning
22	11355359	11355698	After Weaning	Before Weaning
17	58029897	58030494	After Weaning	Before Weaning
25	3574253	3575109	After Weaning	Before Weaning
7	62495822	62496244	After Weaning	Before Weaning
26	15312836	15313023		Before Weaning
7	45422894	45423097		Before Weaning
29	32599992	32600678	After Weaning	Before Weaning
14	54436620	54436945		Before Weaning
3	77923103	77923558	After Weaning	Before Weaning
14	8219480	8219676	After Weaning
3	53764221	53764766	After Weaning	Before Weaning
26	17966542	17966729		Before Weaning
26	22692350	22692538		Before Weaning
3	99867656	99868295	After Weaning	Before Weaning
21	55009459	55009671		Before Weaning
13	29476803	29477450	After Weaning	Before Weaning
1	143305089	143305630	After Weaning	Before Weaning
6	5745177	5745954	After Weaning	Before Weaning
11	98183269	98184172	After Weaning	Before Weaning
15	57931298	57931515		Before Weaning
15	22261575	22262165	After Weaning	Before Weaning
6	106755275	106755810		Before Weaning
18	50987091	50987534	After Weaning	Before Weaning
3	14636487	14637378	After Weaning	Before Weaning	3	14636801	14637420	diffreps_chr3_14636801_14637420	1.37	1.35225e-13	4.34822e-12
8	103783082	103783861	After Weaning	Before Weaning
4	47214255	47214895	After Weaning	Before Weaning
7	6559806	6560023		Before Weaning
25	38879235	38879821		Before Weaning	25	38879321	38879820	diffreps_chr25_38879321_38879820	-1.15	4.91252e-06	4.67046e-05
17	50707728	50708095	After Weaning	Before Weaning
10	36678967	36679402	After Weaning	Before Weaning
21	60221543	60221836	After Weaning
8	44206044	44206247		Before Weaning
4	51106110	51106504		Before Weaning
3	78596730	78596917		Before Weaning
23	23836945	23837619	After Weaning	Before Weaning	23	23837181	23837640	diffreps_chr23_23837181_23837640	-1.25	1.61761e-07	2.02796e-06
9	103686398	103686669		Before Weaning
19	50032401	50032791		Before Weaning
13	43121015	43121213		Before Weaning
20	5331749	5332202	After Weaning	Before Weaning
10	76880043	76880295		Before Weaning
2	6945937	6946236		Before Weaning
7	90705272	90705459		Before Weaning
25	4068217	4068656	After Weaning	Before Weaning
3	101700842	101701198		Before Weaning
15	26346603	26347024	After Weaning	Before Weaning
11	1078597	1078855		Before Weaning
22	26177620	26177883		Before Weaning
14	19756976	19757171		Before Weaning
10	12335373	12335743	After Weaning	Before Weaning
29	9623593	9623846		Before Weaning
3	112340872	112341367	After Weaning	Before Weaning
11	2859160	2859402	After Weaning
3	14259344	14259839		Before Weaning
22	52515796	52516446		Before Weaning
22	51692930	51693889	After Weaning	Before Weaning
3	105796516	105796992	After Weaning	Before Weaning
3	31210790	31211130		Before Weaning
4	51605598	51606553	After Weaning	Before Weaning
8	81197155	81197994	After Weaning	Before Weaning
29	28121698	28122321	After Weaning	Before Weaning
26	41914149	41914368	After Weaning
10	58275506	58276404	After Weaning	Before Weaning
27	33071835	33072031	After Weaning
20	4404797	4405110		Before Weaning
9	49096945	49097754	After Weaning	Before Weaning
3	27356107	27357114	After Weaning	Before Weaning
28	15102704	15103195		Before Weaning
19	5510115	5510727	After Weaning	Before Weaning
19	39299149	39299470		Before Weaning
7	109858074	109858332		Before Weaning
16	41599574	41600856	After Weaning	Before Weaning	16	41599481	41599980	diffreps_chr16_41599481_41599980	1.08	8.76756e-10	1.6109e-08
23	46509503	46509976	After Weaning	Before Weaning
18	57293268	57293676	After Weaning	Before Weaning	18	57291861	57293400	diffreps_chr18_57291861_57293400	1.71	0	0
2	134563471	134564238	After Weaning	Before Weaning
14	82118562	82118834	After Weaning
5	40823399	40823635		Before Weaning
24	7120707	7121405	After Weaning	Before Weaning
2	89861031	89862030	After Weaning	Before Weaning
19	44918797	44919032	After Weaning
10	46563930	46564145	After Weaning
9	25152444	25152806	After Weaning	Before Weaning	9	25152421	25152780	diffreps_chr9_25152421_25152780	-1.41	1.0771e-05	9.59339e-05
9	13246313	13246743		Before Weaning
5	115623588	115623856	After Weaning
12	79599574	79599800		Before Weaning
13	45199074	45199626	After Weaning	Before Weaning
23	14748930	14749358	After Weaning	Before Weaning
2	119286820	119287144		Before Weaning
13	22170745	22170986		Before Weaning
1	150427298	150427644		Before Weaning
9	87847795	87848222		Before Weaning	9	87847841	87848120	diffreps_chr9_87847841_87848120	-2.01	4.45136e-07	5.1419e-06
8	38195682	38196079	After Weaning	Before Weaning
19	61819546	61819733		Before Weaning
22	58762347	58762657		Before Weaning
10	20858394	20858690		Before Weaning
7	15053724	15054263		Before Weaning
9	76398183	76398441		Before Weaning
5	112941325	112942435	After Weaning	Before Weaning	5	112941301	112942460	diffreps_chr5_112941301_112942460	1.18	0	0
13	53962020	53962293		Before Weaning
1	100113507	100113971	After Weaning	Before Weaning	1	100113501	100113960	diffreps_chr1_100113501_100113960	-1.17	3.4059e-07	4.01606e-06
1	146297545	146297732		Before Weaning
26	35010104	35010976	After Weaning	Before Weaning
10	35163095	35163461	After Weaning
14	45020323	45020940	After Weaning	Before Weaning
20	20173505	20173777	After Weaning	Before Weaning
3	91411425	91412737	After Weaning	Before Weaning
11	106383584	106384401	After Weaning	Before Weaning	11	106384021	106384480	diffreps_chr11_106384021_106384480	1.28	6.27629e-09	1.01655e-07
23	6624872	6625161		Before Weaning
3	59473772	59474230	After Weaning	Before Weaning	3	59473761	59474240	diffreps_chr3_59473761_59474240	-1.09	4.92981e-07	5.63276e-06
21	28567383	28567719		Before Weaning
12	52683350	52683722		Before Weaning
13	70083582	70083841	After Weaning
11	102734017	102734204		Before Weaning
13	58784743	58785482	After Weaning	Before Weaning
7	72134008	72134221		Before Weaning
21	8190513	8191030	After Weaning	Before Weaning
13	26785898	26786188	After Weaning		13	26785841	26786200	diffreps_chr13_26785841_26786200	1.23	7.37412e-06	6.77927e-05
17	54477683	54477919		Before Weaning
1	143745612	143745942		Before Weaning
8	60813056	60813492	After Weaning	Before Weaning
5	74561567	74561836	After Weaning
2	17317150	17317337		Before Weaning
2	115145846	115146744	After Weaning	Before Weaning
14	6898449	6898645	After Weaning
9	77255431	77255792		Before Weaning	9	77255401	77255760	diffreps_chr9_77255401_77255760	-2.63	2.53885e-11	5.9425e-10
12	60701869	60702331		Before Weaning
1	55615074	55615282		Before Weaning
1	97687593	97687910		Before Weaning
12	15282405	15282907	After Weaning	Before Weaning
15	6880657	6881179	After Weaning	Before Weaning
25	13646806	13647007		Before Weaning
2	131657580	131657793		Before Weaning
26	33312556	33312773	After Weaning
11	4310932	4311654	After Weaning	Before Weaning
7	65791387	65791813	After Weaning	Before Weaning
10	30520810	30521248		Before Weaning
12	16391411	16391665		Before Weaning
2	1142501	1142749		Before Weaning
24	55924640	55925282	After Weaning	Before Weaning	24	55924881	55925360	diffreps_chr24_55924881_55925360	-1.02	7.99562e-08	1.06075e-06
7	46121927	46122678	After Weaning	Before Weaning
8	51783228	51783590	After Weaning	Before Weaning	8	51783261	51783560	diffreps_chr8_51783261_51783560	-1.33	0.000163057	0.00110722
7	4880434	4881208	After Weaning	Before Weaning
20	20845003	20845297		Before Weaning
11	86488140	86488418		Before Weaning
4	76561682	76562060		Before Weaning
11	102775389	102775585	After Weaning
7	7734034	7734397	After Weaning	Before Weaning
2	4600481	4601410	After Weaning	Before Weaning
16	59695540	59695842		Before Weaning
19	27793768	27794399	After Weaning	Before Weaning
11	1774418	1775062		Before Weaning
11	25365709	25366091		Before Weaning
4	76845659	76845954	After Weaning	Before Weaning
23	1553	1740		Before Weaning
9	78727104	78727430	After Weaning	Before Weaning
22	21625626	21625833		Before Weaning
9	43959383	43959729		Before Weaning
16	80841944	80843329	After Weaning	Before Weaning	16	80841841	80842680	diffreps_chr16_80841841_80842680	1.65	0	0
22	51682885	51683650	After Weaning	Before Weaning
29	48265229	48265949	After Weaning	Before Weaning
26	35250011	35250401	After Weaning	Before Weaning	26	35249981	35250400	diffreps_chr26_35249981_35250400	-1.67	1.45258e-10	3.02702e-09
5	38792273	38792699	After Weaning	Before Weaning
4	54097478	54097847	After Weaning	Before Weaning
6	44644445	44644769		Before Weaning
23	31742462	31742880	After Weaning	Before Weaning
17	52574035	52574598		Before Weaning
10	17595113	17595419	After Weaning
7	63842639	63842872		Before Weaning
15	83593261	83593760	After Weaning	Before Weaning
1	141429653	141429840		Before Weaning
15	30425022	30425483		Before Weaning
15	39615979	39616251		Before Weaning
8	63885823	63886317	After Weaning	Before Weaning
24	4026269	4026606		Before Weaning
5	29018932	29019198		Before Weaning
1	141890053	141890452		Before Weaning
3	34795820	34796055	After Weaning
17	68646766	68647043		Before Weaning
14	31212521	31213036	After Weaning	Before Weaning
20	56071095	56072345	After Weaning	Before Weaning
15	24870635	24871658	After Weaning	Before Weaning
1	116492857	116493176	After Weaning	Before Weaning
19	48151121	48152090	After Weaning	Before Weaning	19	48150181	48152720	diffreps_chr19_48150181_48152720	1.73	0	0
23	31531634	31532833	After Weaning	Before Weaning
12	31440865	31441507	After Weaning	Before Weaning
21	46847867	46848525	After Weaning	Before Weaning
5	24025983	24026176		Before Weaning
4	119640948	119641155		Before Weaning
6	41968809	41969110		Before Weaning
25	28396299	28396698	After Weaning	Before Weaning
21	57414684	57415230	After Weaning	Before Weaning
19	34995645	34995957		Before Weaning
12	52704571	52705003		Before Weaning
2	135903204	135903503		Before Weaning
20	38934433	38934875	After Weaning	Before Weaning	20	38934441	38934840	diffreps_chr20_38934441_38934840	-1.52	2.51236e-07	3.03825e-06
4	76627368	76627782		Before Weaning
26	23868067	23868920	After Weaning	Before Weaning
21	26536844	26537234	After Weaning	Before Weaning
16	71283407	71283625	After Weaning
5	107734307	107735338	After Weaning	Before Weaning
10	74261250	74261727	After Weaning	Before Weaning
23	32844879	32845213		Before Weaning
24	2309641	2310059	After Weaning
19	27643905	27644251	After Weaning		19	27643861	27644140	diffreps_chr19_27643861_27644140	3.07	1.16251e-12	3.31241e-11
16	12870825	12871303	After Weaning	Before Weaning
10	35578732	35578995	After Weaning	Before Weaning
24	26451188	26451422		Before Weaning
24	57428813	57429006		Before Weaning
24	59248961	59249417	After Weaning	Before Weaning
11	96324446	96325432	After Weaning	Before Weaning
14	47552899	47553566	After Weaning	Before Weaning
3	49581298	49581627	After Weaning	Before Weaning
19	18096642	18097140	After Weaning	Before Weaning
18	20598582	20598801		Before Weaning
10	14090025	14090615	After Weaning	Before Weaning
13	57315366	57315607	After Weaning
21	26384607	26384932		Before Weaning
3	110210714	110211502	After Weaning	Before Weaning
17	6597482	6597949		Before Weaning
12	78756568	78757338	After Weaning	Before Weaning
2	80121350	80122264	After Weaning	Before Weaning
14	63952839	63953042		Before Weaning
20	8816430	8817195	After Weaning	Before Weaning
17	59443391	59443606		Before Weaning
4	111490234	111490884	After Weaning	Before Weaning
29	42997575	42997769		Before Weaning
3	92955997	92956333		Before Weaning
16	37102505	37102731		Before Weaning
22	11825313	11825520		Before Weaning
23	20482939	20483135	After Weaning
19	54156326	54156555		Before Weaning
16	75579590	75580296	After Weaning	Before Weaning
8	84516203	84516934	After Weaning	Before Weaning
1	57707843	57708866	After Weaning	Before Weaning
18	44297122	44297345		Before Weaning
9	94556280	94556526		Before Weaning
23	40413769	40414697	After Weaning	Before Weaning
19	39329500	39330858	After Weaning	Before Weaning	19	39328461	39329700	diffreps_chr19_39328461_39329700	1.63	0	0
13	59437358	59437823	After Weaning	Before Weaning
24	22848087	22848277		Before Weaning
25	5500025	5500221	After Weaning
21	37382406	37382960	After Weaning	Before Weaning
7	51246125	51246971	After Weaning	Before Weaning
8	29490702	29491069		Before Weaning
16	52557744	52557985	After Weaning
10	70881275	70881565		Before Weaning
9	92432715	92433053	After Weaning	Before Weaning	9	92432721	92433080	diffreps_chr9_92432721_92433080	-1.17	9.08135e-05	0.000655003
5	70649704	70649971		Before Weaning
25	38180253	38181666	After Weaning	Before Weaning	25	38180721	38181220	diffreps_chr25_38180721_38181220	1.51	8.3259e-11	1.80939e-09
16	43985424	43986370	After Weaning	Before Weaning	16	43985201	43986720	diffreps_chr16_43985201_43986720	1.13	0	0
16	3552992	3553268		Before Weaning
21	66749741	66749942		Before Weaning
2	120675585	120675772		Before Weaning
13	75225687	75226360	After Weaning	Before Weaning
7	18819130	18819388		Before Weaning
6	11798544	11798998	After Weaning	Before Weaning
23	48236406	48236638		Before Weaning
21	27752497	27753022	After Weaning	Before Weaning
1	148972861	148973117		Before Weaning
7	54064265	54064477		Before Weaning
12	35828617	35829633	After Weaning	Before Weaning
6	20702013	20702408	After Weaning	Before Weaning
17	53524364	53524561		Before Weaning
26	15330843	15331063		Before Weaning
1	114865687	114865910		Before Weaning
28	29408731	29409065		Before Weaning
18	62376448	62376716		Before Weaning
2	57139498	57139840		Before Weaning	2	57139541	57139820	diffreps_chr2_57139541_57139820	-2.25	9.30583e-08	1.21749e-06
14	61653196	61653584	After Weaning	Before Weaning
17	12693929	12694710	After Weaning	Before Weaning
8	41681169	41681514		Before Weaning
29	45279819	45281373	After Weaning	Before Weaning	29	45279321	45281700	diffreps_chr29_45279321_45281700	1.46	0	0
7	94981825	94982384	After Weaning	Before Weaning
28	6915441	6915894	After Weaning	Before Weaning
29	17601597	17601956		Before Weaning
19	53596427	53596623	After Weaning
26	44174010	44174457	After Weaning	Before Weaning
16	51647163	51647463		Before Weaning
11	24602742	24603053	After Weaning	Before Weaning
3	33057345	33057806	After Weaning	Before Weaning
6	5787927	5788263		Before Weaning
18	35257015	35257260		Before Weaning
20	66507873	66508119	After Weaning
1	143781704	143782382	After Weaning	Before Weaning
16	72645789	72646374	After Weaning	Before Weaning
24	40981019	40981800	After Weaning	Before Weaning	24	40981021	40981300	diffreps_chr24_40981021_40981300	1.03	0.000369613	0.00228747
17	9181734	9181941		Before Weaning
1	77912082	77912339		Before Weaning
17	72152833	72153046		Before Weaning
8	75736321	75736624		Before Weaning
1	2027289	2027893	After Weaning	Before Weaning
4	114851294	114851489		Before Weaning
25	33311204	33312054	After Weaning	Before Weaning
17	16637267	16637662	After Weaning	Before Weaning
28	39224679	39225219	After Weaning	Before Weaning	28	39224941	39225320	diffreps_chr28_39224941_39225320	1.08	1.0268e-05	9.18707e-05
19	46865529	46865967	After Weaning	Before Weaning
8	29422601	29423121	After Weaning	Before Weaning
1	105809819	105810466	After Weaning	Before Weaning
3	50499189	50499544		Before Weaning
21	65550088	65551066	After Weaning	Before Weaning
2	106533368	106533729	After Weaning	Before Weaning
16	21795272	21795685	After Weaning	Before Weaning
1	127823442	127823958		Before Weaning	1	127823621	127823900	diffreps_chr1_127823621_127823900	-2.1	3.22207e-07	3.81635e-06
9	78723864	78724299	After Weaning	Before Weaning
5	74760793	74761187	After Weaning	Before Weaning
1	151301694	151302137		Before Weaning
24	58163054	58163241		Before Weaning
2	122686118	122686353		Before Weaning
29	16583224	16583411		Before Weaning
19	34239362	34239716	After Weaning	Before Weaning
19	22723222	22723418	After Weaning
6	35876806	35877114		Before Weaning
28	23364735	23365181		Before Weaning	28	23364781	23365180	diffreps_chr28_23364781_23365180	-2.3	1.46982e-12	4.11454e-11
4	108100841	108101184		Before Weaning
10	35439831	35440442	After Weaning	Before Weaning
10	2495301	2495744	After Weaning	Before Weaning
7	24994864	24995156		Before Weaning
14	72610844	72611222		Before Weaning	14	72610921	72611180	diffreps_chr14_72610921_72611180	-2.25	5.55233e-07	6.29121e-06
19	27571900	27572087		Before Weaning
7	31638806	31639212		Before Weaning
21	34664858	34665178		Before Weaning
15	45641803	45642251	After Weaning	Before Weaning	15	45641801	45642200	diffreps_chr15_45641801_45642200	-1.25	5.29485e-06	4.99057e-05
5	68044156	68044375		Before Weaning
3	10515910	10516254	After Weaning	Before Weaning
29	40917057	40918375	After Weaning	Before Weaning
4	51545745	51546257		Before Weaning
18	51828322	51828763	After Weaning	Before Weaning
27	43675830	43676017		Before Weaning
16	1942813	1943596	After Weaning	Before Weaning	16	1942401	1943100	diffreps_chr16_1942401_1943100	1.05	7.80953e-12	1.96617e-10
7	68987940	68988450	After Weaning	Before Weaning
24	33581873	33582180		Before Weaning
22	13662730	13663506	After Weaning	Before Weaning	22	13662821	13663140	diffreps_chr22_13662821_13663140	-1.1	0.00064471	0.0037346
18	52683410	52683780	After Weaning	Before Weaning
12	18727672	18727954		Before Weaning
2	135549341	135549736		Before Weaning
2	124495726	124496151	After Weaning	Before Weaning
5	69549286	69550190	After Weaning	Before Weaning	5	69549781	69550220	diffreps_chr5_69549781_69550220	1.03	1.18948e-07	1.52672e-06
4	99866184	99866633	After Weaning	Before Weaning	4	99866241	99866640	diffreps_chr4_99866241_99866640	-1.21	1.69303e-05	0.00014412
9	52387569	52388013	After Weaning	Before Weaning
22	7572044	7572356		Before Weaning
14	43074043	43074241		Before Weaning
16	51573167	51573875	After Weaning	Before Weaning	16	51572641	51574500	diffreps_chr16_51572641_51574500	1.46	0	0
23	32696979	32697253		Before Weaning
19	43971533	43971995	After Weaning	Before Weaning
1	142376783	142377349	After Weaning	Before Weaning
3	68554711	68555346	After Weaning	Before Weaning
27	19597227	19597690	After Weaning	Before Weaning
9	72601945	72602489		Before Weaning
23	3715056	3715264		Before Weaning
25	36348918	36349312		Before Weaning
3	29316195	29316550	After Weaning	Before Weaning	3	29316241	29316500	diffreps_chr3_29316241_29316500	-1.7	5.26285e-05	0.000401569
23	49341610	49342750	After Weaning	Before Weaning
20	7669946	7670516	After Weaning	Before Weaning
8	11057977	11058318		Before Weaning
4	114391741	114392095		Before Weaning
20	32601891	32602510	After Weaning	Before Weaning
5	117266015	117266202		Before Weaning
13	11869012	11869322		Before Weaning
5	73495502	73495974	After Weaning	Before Weaning
5	116522658	116523085	After Weaning	Before Weaning
26	35092449	35092910	After Weaning	Before Weaning
18	37202413	37202723		Before Weaning
15	63220837	63221175		Before Weaning
1	4181088	4181355		Before Weaning
3	108006500	108007380	After Weaning	Before Weaning
14	48600848	48601053		Before Weaning
17	66912268	66913049	After Weaning	Before Weaning
3	117668409	117668754		Before Weaning
18	53295806	53296140	After Weaning	Before Weaning
26	16944781	16945711	After Weaning	Before Weaning
18	47522594	47523367	After Weaning	Before Weaning
5	32443059	32444858	After Weaning	Before Weaning	5	32442921	32443740	diffreps_chr5_32442921_32443740	1.75	0	0
28	7404787	7405335	After Weaning	Before Weaning	28	7404761	7405140	diffreps_chr28_7404761_7405140	-1.06	0.000169698	0.00114582
1	83056102	83056678	After Weaning	Before Weaning
23	50757384	50757684	After Weaning	Before Weaning
18	48716138	48716489	After Weaning	Before Weaning
15	65187151	65187537		Before Weaning
1	73430770	73430968		Before Weaning
7	63773854	63774076		Before Weaning
19	23659369	23659556		Before Weaning
1	22295955	22296424	After Weaning	Before Weaning
22	58169661	58169853		Before Weaning
17	4604495	4605037		Before Weaning
29	47387388	47387830		Before Weaning
18	59600795	59601066		Before Weaning
5	74224743	74225880	After Weaning	Before Weaning
3	18708210	18708653		Before Weaning
1	77481702	77482032		Before Weaning
6	117000716	117000903		Before Weaning
22	13309323	13309524	After Weaning
9	33131358	33132132	After Weaning	Before Weaning
22	51395897	51396112		Before Weaning
6	104660897	104661456	After Weaning	Before Weaning
7	17332518	17333013	After Weaning	Before Weaning
22	14444965	14445234		Before Weaning
25	3594615	3595010	After Weaning	Before Weaning
19	36869734	36870383	After Weaning	Before Weaning
1	82125817	82126169		Before Weaning
22	57959944	57960207		Before Weaning
16	2225949	2226145	After Weaning	Before Weaning
15	24400212	24400635		Before Weaning
25	33735601	33735896		Before Weaning
16	79754950	79756049	After Weaning	Before Weaning	16	79754861	79756180	diffreps_chr16_79754861_79756180	1.08	0	0
18	21592823	21593169		Before Weaning
8	63187282	63187804	After Weaning	Before Weaning
8	105842516	105843253	After Weaning	Before Weaning
9	69625027	69625287		Before Weaning
19	34781171	34781758	After Weaning	Before Weaning
3	31593257	31593507	After Weaning	Before Weaning
14	66779877	66780208		Before Weaning
22	34951980	34952337		Before Weaning
15	21704726	21705179	After Weaning	Before Weaning
9	80353926	80354220		Before Weaning
22	16767650	16768137	After Weaning	Before Weaning
2	121093340	121093536	After Weaning
7	44145697	44145967	After Weaning
2	96021782	96022398	After Weaning	Before Weaning
19	23052680	23052961	After Weaning	Before Weaning
14	6452766	6453057		Before Weaning
2	134002396	134002641		Before Weaning
9	32587721	32588515	After Weaning	Before Weaning
19	43862608	43862914	After Weaning
19	28992139	28992819		Before Weaning
3	99466366	99466796	After Weaning	Before Weaning
10	26707925	26708295		Before Weaning
1	69945125	69945552		Before Weaning
16	2212397	2212588		Before Weaning
3	32812107	32812891	After Weaning	Before Weaning
15	54542893	54543214		Before Weaning
18	36480500	36481200	After Weaning	Before Weaning
10	2947883	2948090		Before Weaning
9	42151363	42151592		Before Weaning
16	69899687	69899874		Before Weaning
4	116724353	116724824		Before Weaning
13	34139969	34140260		Before Weaning
5	82300632	82300936		Before Weaning
6	70838490	70838932	After Weaning	Before Weaning
5	38909984	38910387	After Weaning	Before Weaning
4	82785994	82786575	After Weaning	Before Weaning
5	101018476	101018833		Before Weaning
27	37731483	37732043	After Weaning	Before Weaning
15	13927770	13928449		Before Weaning
11	104150238	104150568		Before Weaning
3	109883794	109884146	After Weaning	Before Weaning
4	93864831	93865078	After Weaning
18	33547846	33548404	After Weaning	Before Weaning
21	12123304	12123531		Before Weaning
10	78042035	78042543	After Weaning	Before Weaning
5	97473744	97474358	After Weaning	Before Weaning
5	27956251	27956524		Before Weaning
25	38013217	38013730	After Weaning	Before Weaning
1	1456347	1456594		Before Weaning
24	30974955	30975261		Before Weaning	24	30974941	30975260	diffreps_chr24_30974941_30975260	-1.56	1.25753e-05	0.000110033
10	25575566	25575957	After Weaning	Before Weaning
25	10352008	10352218		Before Weaning
1	99419194	99419683	After Weaning	Before Weaning
7	5909038	5909328		Before Weaning
6	61208886	61209154		Before Weaning
5	85121420	85121610		Before Weaning
22	26381904	26382567	After Weaning	Before Weaning
1	4115131	4115744	After Weaning	Before Weaning
7	51293175	51293994	After Weaning	Before Weaning
23	47885197	47885485		Before Weaning
10	76131278	76131557		Before Weaning
17	68271553	68271848		Before Weaning
15	65516474	65516924		Before Weaning
26	17598512	17598843		Before Weaning
2	125182844	125183104		Before Weaning
29	47344909	47345140		Before Weaning
19	38395294	38396161	After Weaning	Before Weaning
3	120464050	120464365		Before Weaning
11	92511782	92511973		Before Weaning
4	105268551	105268953	After Weaning	Before Weaning
3	1608428	1608615		Before Weaning
14	34243102	34243814	After Weaning	Before Weaning
11	68040832	68041145		Before Weaning
11	25037798	25038347	After Weaning	Before Weaning
26	24845021	24845735	After Weaning	Before Weaning
23	10497569	10498007	After Weaning	Before Weaning
4	13153616	13153859		Before Weaning
21	66731640	66731901		Before Weaning
6	40104745	40105399	After Weaning	Before Weaning	6	40104841	40105040	diffreps_chr6_40104841_40105040	-2.2	5.1856e-06	4.90027e-05
27	37192082	37192432		Before Weaning
17	17469503	17469851		Before Weaning
7	21276309	21276680	After Weaning	Before Weaning	7	21276221	21276580	diffreps_chr7_21276221_21276580	2.05	2.67462e-10	5.32712e-09
25	22836532	22836736		Before Weaning
21	6547789	6548098		Before Weaning
18	65138765	65139602	After Weaning	Before Weaning
16	60151853	60152844	After Weaning	Before Weaning
11	103604776	103604976		Before Weaning
25	13222129	13222425		Before Weaning
2	91316527	91317572	After Weaning	Before Weaning
14	13921759	13922373	After Weaning	Before Weaning
4	51214677	51215048		Before Weaning
9	19672261	19672464		Before Weaning
3	98003330	98003551	After Weaning
22	56431203	56432048	After Weaning	Before Weaning
4	43645205	43645501		Before Weaning
26	17890725	17891031	After Weaning	Before Weaning
1	42010217	42011098	After Weaning	Before Weaning
20	26083553	26083862		Before Weaning
14	81659578	81660015		Before Weaning	14	81659581	81660000	diffreps_chr14_81659581_81660000	-2.36	2.79776e-14	9.86198e-13
10	55257631	55257923		Before Weaning
6	67303146	67303505	After Weaning	Before Weaning
21	69113071	69113991	After Weaning	Before Weaning
6	105647492	105647835		Before Weaning	6	105647501	105647820	diffreps_chr6_105647501_105647820	-1.75	5.3449e-06	5.03217e-05
11	27853116	27853505		Before Weaning
3	90649027	90649604	After Weaning	Before Weaning	3	90649261	90649580	diffreps_chr3_90649261_90649580	-1.08	0.000650324	0.00376146
16	35357979	35358337		Before Weaning
24	33127328	33127903	After Weaning	Before Weaning
18	54039570	54040037	After Weaning	Before Weaning
12	16438017	16438204		Before Weaning
24	4095721	4095977		Before Weaning
21	23348461	23348965	After Weaning	Before Weaning
23	24893045	24893340	After Weaning	Before Weaning
21	1606055	1606242		Before Weaning
20	23903496	23903758		Before Weaning
4	91906364	91906551		Before Weaning
29	30351952	30352209		Before Weaning
5	118196998	118197208	After Weaning
15	66894534	66895167	After Weaning	Before Weaning
11	6752106	6752329		Before Weaning
3	104313800	104314068		Before Weaning
28	18505434	18505828		Before Weaning
21	46750213	46750495	After Weaning	Before Weaning
28	15019592	15019803		Before Weaning
26	41900780	41901317		Before Weaning
19	33502234	33502482	After Weaning
15	76642363	76643024	After Weaning	Before Weaning
15	41185384	41185726		Before Weaning
14	69948198	69948592		Before Weaning
4	9971096	9971383		Before Weaning
8	26306121	26306348		Before Weaning
24	10151506	10151835	After Weaning	Before Weaning
3	16469699	16470301		Before Weaning
26	41801498	41801858	After Weaning	Before Weaning
27	35168272	35168501		Before Weaning
24	61458418	61458655		Before Weaning
16	69205577	69205856		Before Weaning
11	67096636	67097066		Before Weaning
18	25681151	25681547	After Weaning	Before Weaning
23	30371273	30371584		Before Weaning
29	36100080	36100425	After Weaning	Before Weaning
2	134926269	134926575	After Weaning	Before Weaning
21	57861645	57861914		Before Weaning
5	110692950	110693183		Before Weaning
1	77204004	77204365		Before Weaning
23	13164425	13164748		Before Weaning
5	88258603	88259348		Before Weaning
15	39826191	39826642	After Weaning	Before Weaning
21	60423888	60424125		Before Weaning
15	43573281	43574091	After Weaning	Before Weaning
17	5043586	5044834	After Weaning	Before Weaning	17	5043861	5044160	diffreps_chr17_5043861_5044160	3.09	5.77316e-13	1.7212e-11
6	114158209	114158630	After Weaning
7	57146597	57146928		Before Weaning	7	57146601	57146860	diffreps_chr7_57146601_57146860	-2.27	3.57023e-07	4.18726e-06
7	51421258	51421576		Before Weaning
9	100810403	100810604		Before Weaning
19	25981388	25981593	After Weaning
3	106373711	106374020		Before Weaning
23	47863511	47863745	After Weaning
11	77345871	77346069		Before Weaning
15	40845921	40846858	After Weaning	Before Weaning
15	28110696	28111000		Before Weaning
2	20017496	20017729		Before Weaning
7	62006842	62007144	After Weaning
23	27673128	27673546	After Weaning	Before Weaning
11	98541316	98542274	After Weaning	Before Weaning	11	98541981	98543160	diffreps_chr11_98541981_98543160	1.46	0	0
18	25907152	25907791	After Weaning	Before Weaning	18	25907461	25907820	diffreps_chr18_25907461_25907820	1.26	4.65361e-06	4.44085e-05
22	47878295	47878532		Before Weaning
28	34487305	34487909		Before Weaning	28	34487461	34487800	diffreps_chr28_34487461_34487800	-2.3	6.50008e-09	1.04969e-07
3	34125298	34125839		Before Weaning
21	26428973	26429804	After Weaning	Before Weaning	21	26429501	26429820	diffreps_chr21_26429501_26429820	2.56	1.53165e-11	3.69692e-10
10	46842824	46843027		Before Weaning
18	38318723	38318937	After Weaning
5	117041600	117041928		Before Weaning
27	23958904	23959573	After Weaning	Before Weaning
5	91957007	91957359	After Weaning	Before Weaning	5	91957041	91957340	diffreps_chr5_91957041_91957340	-1.23	0.000573516	0.00336368
6	29077452	29077641		Before Weaning
25	21506300	21506556	After Weaning	Before Weaning
[truncated: 70,713 more rows]

## Sheet: TableS2
Table S2. After weaning induced and repressed differentially CTCF regions with annotation information.
chr	start	end	CTCF region ID	log2FC	P-value	FDR	annotation	gene chr	gene start	gene end	gene length	gene strand	distance To TSS	ENSEMBL Id	Symbol	Gene Name
INDUCED DIFFERENTIALLY CTCF REGIONS
chr1	1053422	1053820	diffreps_chr1_1053421_1053820	1.31	7.01e-08	9.39e-07	Distal Intergenic	1	1040523	1047018	6496	1	12899	ENSBTAG00000001150	KCNE1	potassium voltage-gated channel subfamily E regulatory subunit 1
chr1	110476422	110476800	diffreps_chr1_110476421_110476800	1.05	7.48e-06	6.87e-05	Distal Intergenic	1	110447554	110461439	13886	1	28868	ENSBTAG00000003851	CCNL1	cyclin L1
chr1	110533382	110534260	diffreps_chr1_110533381_110534260	1.39	0	0	Distal Intergenic	1	110447554	110461439	13886	1	85828	ENSBTAG00000003851	CCNL1	cyclin L1
chr1	115199222	115199520	diffreps_chr1_115199221_115199520	1.62	1.32e-06	1.39e-05	Distal Intergenic	1	115306074	115461588	155515	2	262068	ENSBTAG00000004564	MBNL1	muscleblind like splicing regulator 1
chr1	117408122	117408500	diffreps_chr1_117408121_117408500	2.21	6e-12	1.54e-10	Distal Intergenic	1	117361864	117380744	18881	1	46258	ENSBTAG00000023445	SIAH2	siah E3 ubiquitin protein ligase 2
chr1	127618442	127618880	diffreps_chr1_127618441_127618880	1.28	4.3e-09	7.15e-08	Distal Intergenic	1	127345511	127469070	123560	2	-149372	ENSBTAG00000015413	RASA2	RAS p21 protein activator 2
chr1	127797162	127797600	diffreps_chr1_127797161_127797600	1.29	3.22e-07	3.81e-06	Distal Intergenic	1	127831477	127902068	70592	2	104468	ENSBTAG00000009115	SPSB4	splA/ryanodine receptor domain and SOCS box containing 4
chr1	127861462	127861740	diffreps_chr1_127861461_127861740	1.03	0.000529053	0.00313655	Intron (NM_001192337/512922, intron 1 of 1)	1	127831477	127902068	70592	2	40328	ENSBTAG00000009115	SPSB4	splA/ryanodine receptor domain and SOCS box containing 4
chr1	127996382	127996640	diffreps_chr1_127996381_127996640	1.4	4.3e-05	0.000334662	Distal Intergenic	1	128010259	128042610	32352	2	45970	ENSBTAG00000015310	SLC25A36	solute carrier family 25 member 36
chr1	129579642	129580480	diffreps_chr1_129579641_129580480	1.12	0	0	Intron (NM_001025343/537379, intron 2 of 3)	1	129556754	129583703	26950	1	22888	NA	RBP1	retinol binding protein 1
chr1	130219062	130219540	diffreps_chr1_130219061_130219540	1.22	9.86e-10	1.8e-08	Distal Intergenic	1	130185388	130186521	1134	1	33674	ENSBTAG00000031277	FOXL2	forkhead box L2
chr1	130697842	130698600	diffreps_chr1_130697841_130698600	1.3	3e-15	1.19e-13	Distal Intergenic	1	130707101	130773010	65910	2	74410	ENSBTAG00000001497	MRAS	muscle RAS oncogene homolog
chr1	132164422	132164780	diffreps_chr1_132164421_132164780	1.26	2.26e-06	2.29e-05	Downstream (2-3kb)	1	132167383	132207262	39880	2	42482	ENSBTAG00000008299	IL20RB	interleukin 20 receptor subunit beta
chr1	133411622	133411840	diffreps_chr1_133411621_133411840	1.03	0.00108791	0.00589308	Distal Intergenic	1	132929061	133024300	95240	2	-387322	ENSBTAG00000015221	PCCB	propionyl-CoA carboxylase subunit beta
chr1	135117462	135117700	diffreps_chr1_135117461_135117700	4.04	8.08e-14	2.67e-12	Distal Intergenic	1	135336890	135423994	87105	1	-219190	ENSBTAG00000001324	SLCO2A1	solute carrier organic anion transporter family member 2A1
chr1	135117782	135118120	diffreps_chr1_135117781_135118120	1.03	4.42e-05	0.000342021	Distal Intergenic	1	135336890	135423994	87105	1	-218770	ENSBTAG00000001324	SLCO2A1	solute carrier organic anion transporter family member 2A1
chr1	136044902	136045160	diffreps_chr1_136044901_136045160	1.13	0.000688935	0.00396231	Intron (NM_001101939/511034, intron 4 of 5)	1	135950797	136027624	76828	2	-17278	ENSBTAG00000017659	BFSP2	beaded filament structural protein 2
chr1	139449462	139449720	diffreps_chr1_139449461_139449720	1.03	0.000758164	0.00430314	Intron (NM_001034359/509739, intron 1 of 4)	1	139443100	139458044	14945	1	6362	ENSBTAG00000013629	GET1	guided entry of tail-anchored proteins factor 1
chr1	142153342	142153760	diffreps_chr1_142153341_142153760	1.04	9.46e-07	1.03e-05	Intron (NM_001192676/529537, intron 12 of 13)	1	142142974	142204636	61663	2	50876	ENSBTAG00000021259	C2CD2	C2 calcium dependent domain containing 2
chr1	142218662	142219560	diffreps_chr1_142218661_142219560	1.18	3.4e-14	1.18e-12	Distal Intergenic	1	142142974	142204636	61663	2	-14026	ENSBTAG00000021259	C2CD2	C2 calcium dependent domain containing 2
chr1	142880862	142881320	diffreps_chr1_142880861_142881320	1.18	4.79e-09	7.89e-08	Distal Intergenic	1	142759181	142772362	13182	2	-108500	ENSBTAG00000021284	RSPH1	radial spoke head component 1
chr1	143179842	143180120	diffreps_chr1_143179841_143180120	1.04	0.000366623	0.00227264	Intron (NM_001046350/533382, intron 1 of 11)	1	143160275	143202288	42014	1	19567	ENSBTAG00000014153	PKNOX1	PBX/knotted 1 homeobox 1
chr1	143323462	143324560	diffreps_chr1_143323461_143324560	1.62	0	0	Distal Intergenic	1	143317096	143319923	2828	1	6366	ENSBTAG00000003134	CRYAA	crystallin alpha A
chr1	143524562	143524940	diffreps_chr1_143524561_143524940	1.35	1.77e-07	2.2e-06	Distal Intergenic	1	143641658	143729038	87381	2	204098	ENSBTAG00000017407	HSF2BP	heat shock transcription factor 2 binding protein
chr1	144018742	144019060	diffreps_chr1_144018741_144019060	1.13	1.91e-05	0.00016055	Intron (NM_001038046/506607, intron 7 of 9)	1	143996689	144025711	29023	1	22053	ENSBTAG00000020456	AGPAT3	1-acylglycerol-3-phosphate O-acyltransferase 3
chr1	144151582	144153040	diffreps_chr1_144151581_144153040	1.23	0	0	Exon (NM_001034463/514335, exon 4 of 7)	1	144149299	144158061	8763	1	2283	ENSBTAG00000007106	GATD3A	glutamine amidotransferase like class 1 domain containing 3A
chr1	144158162	144160680	diffreps_chr1_144158161_144160680	1.58	0	0	Distal Intergenic	1	144149299	144158061	8763	1	8863	ENSBTAG00000007106	GATD3A	glutamine amidotransferase like class 1 domain containing 3A
chr1	144450882	144451900	diffreps_chr1_144450881_144451900	2.72	0	0	Intron (NM_001206810/100335468, intron 9 of 11)	1	144424403	144426738	2336	1	26479	ENSBTAG00000017882	LRRC3	leucine rich repeat containing 3
chr1	144453122	144453540	diffreps_chr1_144453121_144453540	1.09	3.05e-07	3.64e-06	Intron (NM_001206810/100335468, intron 9 of 11)	1	144424403	144426738	2336	1	28719	ENSBTAG00000017882	LRRC3	leucine rich repeat containing 3
chr1	144589662	144589940	diffreps_chr1_144589661_144589940	1.01	0.000261725	0.0016819	Intron (NM_001206810/100335468, intron 1 of 11)	1	144579697	144580391	695	1	9965	ENSBTAG00000018610	KRTAP12-2	keratin associated protein 12-2
chr1	144616022	144616300	diffreps_chr1_144616021_144616300	1.15	5.35e-05	0.000407317	Intron (NM_001206810/100335468, intron 1 of 11)	1	144441578	144619108	177531	2	2808	ENSBTAG00000018607	TSPEAR	thrombospondin type laminin G domain and EAR repeats
chr1	144758022	144758560	diffreps_chr1_144758021_144758560	1.17	7.92e-13	2.3e-11	Downstream (<1kb)	1	144713170	144730575	17406	2	-27447	ENSBTAG00000021771	PTTG1IP	PTTG1 interacting protein
chr1	144764222	144764600	diffreps_chr1_144764221_144764600	1.02	1.56e-05	0.000133607	Intron (NM_175781/281877, intron 10 of 15)	1	144759548	144788699	29152	2	24099	ENSBTAG00000017060	ITGB2	integrin subunit beta 2
chr1	144817922	144818600	diffreps_chr1_144817921_144818600	1.13	1.41e-12	3.98e-11	Intron (NM_001046108/512069, intron 2 of 5)	1	144809574	144833724	24151	1	8348	ENSBTAG00000017010	FAM207A	family with sequence similarity 207 member A
chr1	145228942	145229840	diffreps_chr1_145228941_145229840	1.43	0	0	Distal Intergenic	1	145244296	145296600	52305	1	-14456	ENSBTAG00000023907	COL18A1	collagen type XVIII alpha 1 chain
chr1	145272502	145273120	diffreps_chr1_145272501_145273120	1.78	7.11e-15	2.68e-13	Intron (NM_001083388/508076, intron 5 of 40)	1	145244296	145296600	52305	1	28206	ENSBTAG00000023907	COL18A1	collagen type XVIII alpha 1 chain
chr1	145296922	145297420	diffreps_chr1_145296921_145297420	1.59	1.45e-11	3.51e-10	Downstream (2-3kb)	1	145299696	145325287	25592	2	27867	ENSBTAG00000024162	SLC19A1	solute carrier family 19 member 1
chr1	145546362	145547160	diffreps_chr1_145546361_145547160	1.51	0	0	Intron (NM_001076284/613725, intron 1 of 14)	1	145668730	145687976	19247	1	-121570	ENSBTAG00000011802	COL6A1	collagen type VI alpha 1 chain
chr1	146465882	146466100	diffreps_chr1_146465881_146466100	3.32	4.34e-11	9.78e-10	Distal Intergenic	1	146528127	146556177	28051	1	-62027	ENSBTAG00000007039	FBXO25	F-box protein 25
chr1	146466602	146467380	diffreps_chr1_146466601_146467380	1.63	0	0	Distal Intergenic	1	146528127	146556177	28051	1	-60747	ENSBTAG00000007039	FBXO25	F-box protein 25
chr1	146493322	146493920	diffreps_chr1_146493321_146493920	1.19	9.57e-11	2.05e-09	Distal Intergenic	1	146528127	146556177	28051	1	-34207	ENSBTAG00000007039	FBXO25	F-box protein 25
chr1	148502782	148504000	diffreps_chr1_148502781_148504000	3.07	0	0	Distal Intergenic	1	148440916	148450703	9788	1	61866	ENSBTAG00000018688	CBR3	carbonyl reductase 3
chr1	148687902	148688100	diffreps_chr1_148687901_148688100	2.22	3.36e-07	3.97e-06	Distal Intergenic	1	148658317	148683915	25599	1	29585	ENSBTAG00000011880	CHAF1B	chromatin assembly factor 1 subunit B
chr1	149201382	149201760	diffreps_chr1_149201381_149201760	1.04	7.55e-06	6.93e-05	Distal Intergenic	1	149305062	149317771	12710	2	116011	ENSBTAG00000055107	PIGP	phosphatidylinositol glycan anchor biosynthesis class P
chr1	150453402	150453840	diffreps_chr1_150453401_150453840	1.93	6.77e-12	1.72e-10	Distal Intergenic	1	150591084	150595750	4667	1	-137244	ENSBTAG00000000973	KCNJ15	potassium inwardly rectifying channel subfamily J member 15
chr1	150649282	150649780	diffreps_chr1_150649281_150649780	3.25	0	0	Distal Intergenic	1	150591084	150595750	4667	1	58198	ENSBTAG00000000973	KCNJ15	potassium inwardly rectifying channel subfamily J member 15
chr1	150651242	150651840	diffreps_chr1_150651241_150651840	1.44	9.51e-12	2.36e-10	Distal Intergenic	1	150591084	150595750	4667	1	60158	ENSBTAG00000000973	KCNJ15	potassium inwardly rectifying channel subfamily J member 15
chr1	152428562	152429240	diffreps_chr1_152428561_152429240	1.12	5.87e-12	1.51e-10	Distal Intergenic	1	152450841	152463273	12433	1	-21601	ENSBTAG00000019202	EAF1	ELL associated factor 1
chr1	152853522	152853860	diffreps_chr1_152853521_152853860	1.18	8.39e-06	7.62e-05	Distal Intergenic	1	152698435	152833098	134664	2	-20424	ENSBTAG00000024815	ANKRD28	ankyrin repeat domain 28
chr1	153181342	153182240	diffreps_chr1_153181341_153182240	1.14	0	0	Intron (NM_001193182/618078, intron 1 of 10)	1	153179306	153226107	46802	1	2036	ENSBTAG00000008240	GALNT15	polypeptide N-acetylgalactosaminyltransferase 15
chr1	153251142	153251620	diffreps_chr1_153251141_153251620	3.62	0	0	Distal Intergenic	1	153260334	153266510	6177	2	14890	ENSBTAG00000003916	DPH3	diphthamide biosynthesis 3
chr1	153273522	153273740	diffreps_chr1_153273521_153273740	1.14	0.00141715	0.00742539	Promoter (<=1kb)	1	153274504	153318616	44113	1	-764	ENSBTAG00000004891	OXNAD1	oxidoreductase NAD binding domain containing 1
chr1	158292242	158292580	diffreps_chr1_158292241_158292580	1.31	1.22e-05	0.000107167	Promoter (<=1kb)	1	158238278	158293060	54783	2	480	ENSBTAG00000002896	KPNA6	karyopherin subunit alpha 6
chr1	158401722	158402260	diffreps_chr1_158401721_158402260	1.33	1.13e-09	2.05e-08	Intron (NM_177493/281013, intron 6 of 11)	1	158390488	158416238	25751	1	11234	ENSBTAG00000049541	ASMT	acetylserotonin O-methyltransferase
chr1	3899422	3899720	diffreps_chr1_3899421_3899720	1.11	8.12e-05	0.000593002	Distal Intergenic	1	3824612	3833280	8669	2	-66142	ENSBTAG00000018854	SOD1	superoxide dismutase 1
chr1	3908742	3909320	diffreps_chr1_3908741_3909320	1.25	3.31e-11	7.63e-10	Distal Intergenic	1	3824612	3833280	8669	2	-75462	ENSBTAG00000018854	SOD1	superoxide dismutase 1
chr1	42950182	42950640	diffreps_chr1_42950181_42950640	1.27	3.69e-10	7.2e-09	Distal Intergenic	1	42888156	42901415	13260	2	-48767	ENSBTAG00000004124	CPOX	coproporphyrinogen oxidase
chr1	43131682	43132020	diffreps_chr1_43131681_43132020	1.01	9.06e-05	0.000653733	Exon (NM_001205911/524608, exon 9 of 16)	1	43112084	43194797	82714	2	62777	ENSBTAG00000014889	DCBLD2	discoidin, CUB and LCCL domain containing 2
chr1	44539862	44540260	diffreps_chr1_44539861_44540260	1.04	5.32e-06	5.01e-05	Distal Intergenic	1	44483383	44508873	25491	1	56479	ENSBTAG00000013667	TMEM30C	transmembrane protein 30C
chr1	52568082	52568380	diffreps_chr1_52568081_52568380	1.19	0.000145463	0.000998384	Distal Intergenic	1	52712126	52777176	65051	2	208796	ENSBTAG00000003585	CD47	CD47 molecule
chr1	56899802	56900140	diffreps_chr1_56899801_56900140	3.33	4.44e-16	1.93e-14	Distal Intergenic	1	56930218	56944239	14022	2	44099	ENSBTAG00000048550	GCSAM	germinal center associated signaling and motility
chr1	57563982	57564620	diffreps_chr1_57563981_57564620	1.56	0	0	Distal Intergenic	1	57639764	57681049	41286	2	116429	ENSBTAG00000001235	CD200R1L	CD200 receptor 1-like
chr1	58319462	58319860	diffreps_chr1_58319461_58319860	1.12	6.67e-06	6.17e-05	Intron (NM_001205633/508259, intron 21 of 24)	1	58218879	58326309	107431	1	100583	ENSBTAG00000013292	SIDT1	SID1 transmembrane family member 1
chr1	58325122	58325500	diffreps_chr1_58325121_58325500	1.28	1.13e-07	1.46e-06	Intron (NM_001205633/508259, intron 24 of 24)	1	58218879	58326309	107431	1	106243	ENSBTAG00000013292	SIDT1	SID1 transmembrane family member 1
chr1	65157082	65157360	diffreps_chr1_65157081_65157360	2.18	8.56e-09	1.35e-07	Intron (NM_001017950/534482, intron 2 of 10)	1	65138522	65198315	59794	2	40955	ENSBTAG00000022155	FSTL1	follistatin like 1
chr1	67709922	67710120	diffreps_chr1_67709921_67710120	3.18	7.66e-10	1.41e-08	Intron (NM_001192069/505740, intron 6 of 20)	1	67666355	67823121	156767	2	113001	ENSBTAG00000018777	ADCY5	adenylate cyclase 5
chr1	67710382	67710760	diffreps_chr1_67710381_67710760	1.27	7.22e-07	8.01e-06	Exon (NM_001192069/505740, exon 6 of 21)	1	67666355	67823121	156767	2	112361	ENSBTAG00000018777	ADCY5	adenylate cyclase 5
chr1	69195762	69196140	diffreps_chr1_69195761_69196140	1.25	1.1e-06	1.18e-05	Downstream (<1kb)	1	69127829	69177876	50048	1	67933	ENSBTAG00000013727	UMPS	uridine monophosphate synthetase
chr1	70111782	70112040	diffreps_chr1_70111781_70112040	1.12	0.000336485	0.00210749	Distal Intergenic	1	69962335	70052897	90563	2	-58885	ENSBTAG00000006471	OSBPL11	oxysterol binding protein like 11
chr1	70582822	70583360	diffreps_chr1_70582821_70583360	1.02	2.73e-06	2.72e-05	Distal Intergenic	1	70600188	70622951	22764	2	39591	ENSBTAG00000021364	TNK2	tyrosine kinase non receptor 2
chr1	70600542	70600900	diffreps_chr1_70600541_70600900	2.05	1.07e-10	2.28e-09	3' UTR	1	70600188	70622951	22764	2	22051	ENSBTAG00000021364	TNK2	tyrosine kinase non receptor 2
chr1	70625302	70625520	diffreps_chr1_70625301_70625520	2.29	9.82e-08	1.28e-06	Distal Intergenic	1	70600188	70622951	22764	2	-2351	ENSBTAG00000021364	TNK2	tyrosine kinase non receptor 2
chr1	71441602	71441860	diffreps_chr1_71441601_71441860	3.43	6.73e-14	2.25e-12	Distal Intergenic	1	71404766	71410588	5823	2	-31014	ENSBTAG00000008873	NCBP2	nuclear cap binding protein subunit 2
chr1	71956802	71957040	diffreps_chr1_71956801_71957040	2.94	3.3e-10	6.49e-09	Distal Intergenic	1	71964666	72000537	35872	2	43497	ENSBTAG00000000448	BDH1	3-hydroxybutyrate dehydrogenase 1
chr1	71970382	71971880	diffreps_chr1_71970381_71971880	1.28	0	0	Intron (NM_001034600/534090, intron 5 of 6)	1	71964666	72000537	35872	2	28657	ENSBTAG00000000448	BDH1	3-hydroxybutyrate dehydrogenase 1
chr1	72035842	72036260	diffreps_chr1_72035841_72036260	2.07	1.69e-14	6.09e-13	Distal Intergenic	1	72062332	72075639	13308	1	-26072	ENSBTAG00000023600	APOD	apolipoprotein D
chr1	72335842	72336240	diffreps_chr1_72335841_72336240	1.15	1.07e-06	1.15e-05	Intron (NM_001075999/533703, intron 1 of 3)	1	72326778	72499172	172395	1	9064	ENSBTAG00000014564	XXYLT1	xyloside xylosyltransferase 1
chr1	73183742	73184080	diffreps_chr1_73183741_73184080	1.52	1.22e-07	1.56e-06	Intron (NM_001101232/614562, intron 1 of 1)	1	73178781	73188077	9297	1	4961	ENSBTAG00000032656	CPN2	carboxypeptidase N subunit 2
chr1	73205182	73205500	diffreps_chr1_73205181_73205500	3.22	1.69e-14	6.09e-13	Distal Intergenic	1	73178781	73188077	9297	1	26401	ENSBTAG00000032656	CPN2	carboxypeptidase N subunit 2
chr1	7426962	7427600	diffreps_chr1_7426961_7427600	1.05	4.67e-10	8.94e-09	Distal Intergenic	1	7267112	7280839	13728	2	-146123	ENSBTAG00000001412	N6AMT1	N-6 adenine-specific DNA methyltransferase 1
chr1	77053802	77054120	diffreps_chr1_77053801_77054120	1.06	0.000124472	0.000869265	Distal Intergenic	1	77130195	77309576	179382	1	-76075	ENSBTAG00000021025	P3H2	prolyl 3-hydroxylase 2
chr1	78111822	78112200	diffreps_chr1_78111821_78112200	1.35	1.77e-07	2.2e-06	Intron (NM_001193079/615508, intron 3 of 5)	1	78014932	78169293	154362	2	57093	ENSBTAG00000032538	TPRG1	tumor protein p63 regulated 1
chr1	78201262	78201540	diffreps_chr1_78201261_78201540	1.09	8.4e-05	0.00061119	Distal Intergenic	1	78014932	78169293	154362	2	-31969	ENSBTAG00000032538	TPRG1	tumor protein p63 regulated 1
chr1	80693702	80694000	diffreps_chr1_80693701_80694000	1.24	3.03e-05	0.000243974	Intron (NM_174292/281724, intron 1 of 2)	1	80690735	80696502	5768	1	2967	ENSBTAG00000003140	CRYGS	crystallin gamma S
chr1	81453702	81454000	diffreps_chr1_81453701_81454000	1.1	0.00016806	0.00113676	Intron (NM_001192504/519028, intron 2 of 15)	1	81402116	81571987	169872	1	51586	ENSBTAG00000007666	IGF2BP2	insulin like growth factor 2 mRNA binding protein 2
chr1	82436142	82437200	diffreps_chr1_82436141_82437200	1.38	0	0	Distal Intergenic	1	82499645	82501239	1595	1	-62445	ENSBTAG00000019014	MAGEF1	MAGE family member F1
chr1	82437402	82438180	diffreps_chr1_82437401_82438180	1.34	6.11e-15	2.33e-13	Distal Intergenic	1	82499645	82501239	1595	1	-61465	ENSBTAG00000019014	MAGEF1	MAGE family member F1
chr1	82649142	82649760	diffreps_chr1_82649141_82649760	1.05	4.11e-08	5.72e-07	Distal Intergenic	1	82610937	82631511	20575	2	-17631	ENSBTAG00000005313	EPHB3	EPH receptor B3
chr1	82836482	82837820	diffreps_chr1_82836481_82837820	1.79	0	0	Exon (NM_001102487/505569, exon 14 of 24)	1	82830348	82844403	14056	1	6134	ENSBTAG00000012284	CLCN2	chloride voltage-gated channel 2
chr1	99973402	99973800	diffreps_chr1_99973401_99973800	1.45	3.69e-08	5.19e-07	Distal Intergenic	1	99995832	100031889	36058	1	-22032	ENSBTAG00000011423	SERPINI2	serpin family I member 2
chr10	100718602	100718800	diffreps_chr10_100718601_100718800	1.96	3.31e-06	3.25e-05	Distal Intergenic	10	100301923	100460004	158082	2	-258598	ENSBTAG00000009994	EML5	EMAP like 5
chr10	101858262	101858700	diffreps_chr10_101858261_101858700	1.63	1.84e-10	3.74e-09	Distal Intergenic	10	101862243	101874842	12600	1	-3543	ENSBTAG00000005426	PSMC1	proteasome 26S subunit, ATPase 1
chr10	101882982	101883280	diffreps_chr10_101882981_101883280	1.01	0.000261725	0.0016819	Intron (NM_001206507/100138828, intron 10 of 13)	10	101862243	101874842	12600	1	20739	ENSBTAG00000005426	PSMC1	proteasome 26S subunit, ATPase 1
chr10	102373122	102373340	diffreps_chr10_102373121_102373340	1.48	5.04e-05	0.000385943	Distal Intergenic	10	102478630	102673838	195209	2	300498	ENSBTAG00000010906	RPS6KA5	ribosomal protein S6 kinase A5
chr10	102373722	102374360	diffreps_chr10_102373721_102374360	1.13	1.6e-11	3.85e-10	Distal Intergenic	10	102478630	102673838	195209	2	299478	ENSBTAG00000010906	RPS6KA5	ribosomal protein S6 kinase A5
chr10	10839382	10839760	diffreps_chr10_10839381_10839760	1.05	1.51e-05	0.000130169	Distal Intergenic	10	10675335	10773418	98084	1	164047	ENSBTAG00000006823	CMYA5	cardiomyopathy associated 5
chr10	12169082	12170340	diffreps_chr10_12169081_12170340	1.19	0	0	Distal Intergenic	10	12203466	12228730	25265	2	58390	ENSBTAG00000012352	PARP16	poly(ADP-ribose) polymerase family member 16
chr10	12257622	12258340	diffreps_chr10_12257621_12258340	1.05	7.21e-13	2.12e-11	Distal Intergenic	10	12203466	12228730	25265	2	-28892	ENSBTAG00000012352	PARP16	poly(ADP-ribose) polymerase family member 16
chr10	12536682	12537180	diffreps_chr10_12536681_12537180	1.07	3.93e-08	5.5e-07	Exon (NM_174655/282474, exon 3 of 11)	10	12522262	12550615	28354	1	14420	ENSBTAG00000025826	SLC24A1	solute carrier family 24 member 1
chr10	12730862	12731340	diffreps_chr10_12730861_12731340	1.39	1.82e-10	3.72e-09	Distal Intergenic	10	12743326	12743405	80	2	12065	ENSBTAG00000044258	MIR2290	microRNA mir-2290
chr10	13469382	13469900	diffreps_chr10_13469381_13469900	1.03	2.76e-09	4.71e-08	Distal Intergenic	10	13404231	13420411	16181	2	-48971	ENSBTAG00000005214	LCTL	lactase like
chr10	13680942	13681680	diffreps_chr10_13680941_13681680	2.17	0	0	Distal Intergenic	10	13544547	13621037	76491	1	136395	ENSBTAG00000000625	SMAD6	SMAD family member 6
chr10	13682022	13682420	diffreps_chr10_13682021_13682420	1.85	1.5e-10	3.12e-09	Distal Intergenic	10	13544547	13621037	76491	1	137475	ENSBTAG00000000625	SMAD6	SMAD family member 6
chr10	13688502	13689100	diffreps_chr10_13688501_13689100	1.24	1.53e-10	3.18e-09	Distal Intergenic	10	13544547	13621037	76491	1	143955	ENSBTAG00000000625	SMAD6	SMAD family member 6
chr10	13778282	13778720	diffreps_chr10_13778281_13778720	1.07	3.59e-06	3.5e-05	Distal Intergenic	10	13895783	14018262	122480	1	-117063	ENSBTAG00000012599	SMAD3	SMAD family member 3
chr10	14681962	14682200	diffreps_chr10_14681961_14682200	1.24	0.000402167	0.00245912	Distal Intergenic	10	14905244	15029730	124487	1	-223044	ENSBTAG00000005564	PIAS1	protein inhibitor of activated STAT 1
chr10	15055522	15056700	diffreps_chr10_15055521_15056700	1.06	0	0	Exon (NM_001109984/617615, exon 4 of 7)	10	15035519	15044830	9312	2	-10692	ENSBTAG00000025822	CALML4	calmodulin like 4
chr10	15130122	15130720	diffreps_chr10_15130121_15130720	2.8	0	0	Distal Intergenic	10	15106163	15118280	12118	1	23959	ENSBTAG00000008378	FEM1B	fem-1 homolog B
chr10	15388462	15388820	diffreps_chr10_15388461_15388820	1.1	3.44e-06	3.36e-05	Distal Intergenic	10	15613398	15652308	38911	2	263488	ENSBTAG00000012365	ANP32A	acidic nuclear phosphoprotein 32 family member A
chr10	15723542	15724140	diffreps_chr10_15723541_15724140	1.16	1.13e-10	2.39e-09	Distal Intergenic	10	15763617	15791718	28102	1	-39477	ENSBTAG00000005994	SPESP1	sperm equatorial segment protein 1
chr10	15862302	15862740	diffreps_chr10_15862301_15862740	1.08	2.5e-06	2.51e-05	Exon (NM_001101137/531303, exon 3 of 15)	10	15856219	15888226	32008	1	6083	ENSBTAG00000009030	NOX5	NADPH oxidase 5
chr10	15950202	15950400	diffreps_chr10_15950201_15950400	2.96	2.93e-09	4.97e-08	Distal Intergenic	10	15856219	15888226	32008	1	93983	ENSBTAG00000009030	NOX5	NADPH oxidase 5
chr10	16204922	16205280	diffreps_chr10_16204921_16205280	1.2	2.72e-06	2.71e-05	Distal Intergenic	10	16128347	16137689	9343	1	76575	ENSBTAG00000001405	GLCE	glucuronic acid epimerase
chr10	16257922	16258160	diffreps_chr10_16257921_16258160	2.45	4.24e-09	7.05e-08	Distal Intergenic	10	16287677	16328200	40524	1	-29517	ENSBTAG00000009983	KIF23	kinesin family member 23
chr10	16258762	16259200	diffreps_chr10_16258761_16259200	1.16	1.78e-07	2.21e-06	Distal Intergenic	10	16287677	16328200	40524	1	-28477	ENSBTAG00000009983	KIF23	kinesin family member 23
chr10	17349282	17349580	diffreps_chr10_17349281_17349580	1.48	2.2e-06	2.24e-05	Distal Intergenic	10	17381552	17381611	60	2	32031	NA	MIR2285AR	microRNA mir-2285ar
chr10	17374602	17374940	diffreps_chr10_17374601_17374940	4.2	0	0	Distal Intergenic	10	17381552	17381611	60	2	6671	NA	MIR2285AR	microRNA mir-2285ar
chr10	17394922	17395960	diffreps_chr10_17394921_17395960	1.3	0	0	Distal Intergenic	10	17381552	17381611	60	2	-13311	NA	MIR2285AR	microRNA mir-2285ar
chr10	18267342	18267540	diffreps_chr10_18267341_18267540	1.24	0.000845232	0.00472424	Distal Intergenic	10	18399101	18596371	197271	1	-131561	ENSBTAG00000011644	THSD4	thrombospondin type 1 domain containing 4
chr10	19138542	19138760	diffreps_chr10_19138541_19138760	1.97	5.2e-07	5.92e-06	Exon (NM_001205727/512571, exon 11 of 11)	10	19137913	19164576	26664	2	25816	ENSBTAG00000001601	PKM	pyruvate kinase M1/2
chr10	20514982	20515180	diffreps_chr10_20514981_20515180	1.6	5.5e-05	0.000417991	Distal Intergenic	10	20546931	20559337	12407	2	44157	ENSBTAG00000025803	INSYN1	inhibitory synaptic factor 1
chr10	20736982	20737560	diffreps_chr10_20736981_20737560	1.08	6.91e-09	1.11e-07	3' UTR	10	20731347	20734733	3387	1	5635	ENSBTAG00000004788	SDR39U1	short chain dehydrogenase/reductase family 39U member 1
chr10	20761902	20762100	diffreps_chr10_20761901_20762100	1.18	0.00134308	0.00708284	Intron (NM_001192459/516993, intron 6 of 8)	10	20755336	20776156	20821	2	14056	ENSBTAG00000007149	NYNRIN	NYN domain and retroviral integrase containing
chr10	21064122	21064360	diffreps_chr10_21064121_21064360	1.02	0.00156335	0.0080558	Exon (NM_001045990/508059, exon 10 of 16)	10	21062389	21067448	5060	2	3088	ENSBTAG00000001870	CPNE6	copine 6
chr10	21081322	21081940	diffreps_chr10_21081321_21081940	1.28	1.1e-12	3.13e-11	Exon (NM_001192464/517186, exon 15 of 40)	10	21070631	21087501	16871	2	5561	ENSBTAG00000015208	CARMIL3	capping protein regulator and myosin 1 linker 3
chr10	21124482	21124880	diffreps_chr10_21124481_21124880	1.38	7.25e-08	9.69e-07	Distal Intergenic	10	21088244	21100627	12384	2	-23855	ENSBTAG00000017665	DHRS4	dehydrogenase/reductase (SDR family) member 4
chr10	21388722	21389380	diffreps_chr10_21388721_21389380	1.42	5.81e-14	1.97e-12	3' UTR	10	21388428	21392402	3975	2	3022	ENSBTAG00000007097	THTPA	thiamine triphosphatase
chr10	21469462	21469860	diffreps_chr10_21469461_21469860	1.28	1.48e-06	1.55e-05	Promoter (<=1kb)	10	21461582	21468762	7181	2	-700	ENSBTAG00000009595	NGDN	neuroguidin
chr10	21791762	21791960	diffreps_chr10_21791761_21791960	1.6	5.5e-05	0.000417991	Distal Intergenic	10	21815963	21817136	1174	2	25176	NA	PSMB11	proteasome subunit beta 11
chr10	21804162	21805080	diffreps_chr10_21804161_21805080	1.05	6.68e-14	2.24e-12	Distal Intergenic	10	21815963	21817136	1174	2	12056	NA	PSMB11	proteasome subunit beta 11
chr10	21858862	21859360	diffreps_chr10_21858861_21859360	1.2	1.81e-08	2.7e-07	Distal Intergenic	10	21862575	21871276	8702	1	-3215	ENSBTAG00000012724	AJUBA	ajuba LIM protein
chr10	21870122	21870420	diffreps_chr10_21870121_21870420	1.07	6.05e-05	0.000455685	Exon (NM_001192517/519937, exon 7 of 8)	10	21862575	21871276	8702	1	7547	ENSBTAG00000012724	AJUBA	ajuba LIM protein
chr10	21992802	21994460	diffreps_chr10_21992801_21994460	1.1	0	0	Promoter (1-2kb)	10	21995779	22026915	31137	1	-1319	ENSBTAG00000014821	SLC7A7	solute carrier family 7 member 7
chr10	22341642	22341960	diffreps_chr10_22341641_22341960	2.85	2.44e-14	8.66e-13	Distal Intergenic	10	22229577	22251343	21767	1	112065	ENSBTAG00000019077	DAD1	defender against cell death 1
chr10	22521602	22522260	diffreps_chr10_22521601_22522260	1.32	3.23e-14	1.13e-12	Distal Intergenic	10	22229577	22251343	21767	1	292025	ENSBTAG00000019077	DAD1	defender against cell death 1
chr10	25998822	25999940	diffreps_chr10_25998821_25999940	1.29	0	0	Downstream (1-2kb)	10	25987818	25990641	2824	2	-8181	ENSBTAG00000032908	TMEM253	transmembrane protein 253
chr10	26183602	26183880	diffreps_chr10_26183601_26183880	1.24	0.000192275	0.00127741	Distal Intergenic	10	26170843	26171743	901	2	-11859	ENSBTAG00000025664	RNASE2	ribonuclease A family member 2
chr10	26445562	26445780	diffreps_chr10_26445561_26445780	1.35	0.000222071	0.00145479	Distal Intergenic	10	26401173	26413011	11839	2	-32551	ENSBTAG00000046668	ANG2	angiogenin 2
chr10	26488722	26489080	diffreps_chr10_26488721_26489080	1.09	5.89e-05	0.000444223	Distal Intergenic	10	26401173	26413011	11839	2	-75711	ENSBTAG00000046668	ANG2	angiogenin 2
chr10	34179242	34179440	diffreps_chr10_34179241_34179440	1.56	6.15e-05	0.000462258	Promoter (<=1kb)	10	34100136	34179132	78997	2	-110	ENSBTAG00000021872	RASGRP1	RAS guanyl releasing protein 1
chr10	35752622	35753180	diffreps_chr10_35752621_35753180	1.38	3.1e-11	7.16e-10	Promoter (1-2kb)	10	35739876	35754466	14591	2	1286	ENSBTAG00000012180	BMF	Bcl2 modifying factor
chr10	35892322	35893120	diffreps_chr10_35892321_35893120	1.09	3.66e-15	1.44e-13	Exon (NM_001192198/539224, exon 9 of 10)	10	35866771	35895685	28915	1	25551	ENSBTAG00000019076	PAK6	p21 (RAC1) activated kinase 6
chr10	35928962	35929320	diffreps_chr10_35928961_35929320	1.14	9.06e-06	8.18e-05	Distal Intergenic	10	35906038	35926928	20891	2	-2034	ENSBTAG00000019079	PLCB2	phospholipase C beta 2
chr10	35930342	35930560	diffreps_chr10_35930341_35930560	3.36	2.1e-11	4.97e-10	Distal Intergenic	10	35906038	35926928	20891	2	-3414	ENSBTAG00000019079	PLCB2	phospholipase C beta 2
chr10	35936902	35937220	diffreps_chr10_35936901_35937220	3.04	1.34e-13	4.31e-12	Distal Intergenic	10	35906038	35926928	20891	2	-9974	ENSBTAG00000019079	PLCB2	phospholipase C beta 2
chr10	35938202	35938540	diffreps_chr10_35938201_35938540	2.55	3.35e-12	8.95e-11	Distal Intergenic	10	35906038	35926928	20891	2	-11274	ENSBTAG00000019079	PLCB2	phospholipase C beta 2
chr10	35953962	35954700	diffreps_chr10_35953961_35954700	1.12	1.21e-11	2.95e-10	Distal Intergenic	10	35967493	35973540	6048	1	-12793	ENSBTAG00000049093	PHGR1	proline/histidine/glycine-rich 1
chr10	35958442	35959440	diffreps_chr10_35958441_35959440	1.09	0	0	Distal Intergenic	10	35967493	35973540	6048	1	-8053	ENSBTAG00000049093	PHGR1	proline/histidine/glycine-rich 1
chr10	36443082	36444060	diffreps_chr10_36443081_36444060	1.6	0	0	Distal Intergenic	10	36433672	36442377	8706	1	9410	ENSBTAG00000011567	VPS18	VPS18 core subunit of CORVET and HOPS complexes
chr10	36476302	36477020	diffreps_chr10_36476301_36477020	1.04	6.77e-10	1.27e-08	Distal Intergenic	10	36485787	36488158	2372	1	-8767	ENSBTAG00000010371	CHAC1	ChaC glutathione specific gamma-glutamylcyclotransferase 1
chr10	37169762	37169960	diffreps_chr10_37169761_37169960	1.31	0.000518548	0.00308334	Distal Intergenic	10	37152687	37152748	62	2	-17014	NA	MIR2285CR-1	microRNA mir-2285cr-1
chr10	37204662	37205420	diffreps_chr10_37204661_37205420	1.88	0	0	Distal Intergenic	10	37222172	37228629	6458	1	-16752	ENSBTAG00000046607	JMJD7	jumonji domain containing 7
chr10	37242462	37242840	diffreps_chr10_37242461_37242840	1.46	5e-08	6.87e-07	Distal Intergenic	10	37229583	37238907	9325	1	12879	ENSBTAG00000006784	PLA2G4B	phospholipase A2, group IVB (cytosolic)
chr10	37396142	37397460	diffreps_chr10_37396141_37397460	1.56	0	0	Distal Intergenic	10	37295621	37379520	83900	2	-16622	ENSBTAG00000006792	EHD4	EH domain containing 4
chr10	37398422	37398860	diffreps_chr10_37398421_37398860	1.01	3.46e-07	4.07e-06	Distal Intergenic	10	37295621	37379520	83900	2	-18902	ENSBTAG00000006792	EHD4	EH domain containing 4
chr10	37475462	37476300	diffreps_chr10_37475461_37476300	1.49	0	0	Distal Intergenic	10	37485318	37507804	22487	2	31504	ENSBTAG00000005268	PLA2G4D	phospholipase A2 group IVD
chr10	42629322	42629660	diffreps_chr10_42629321_42629660	1.12	5.59e-05	0.000424077	Promoter (<=1kb)	10	42629551	42629849	299	1	0	ENSBTAG00000049916	RN7SL1	RNA, 7SL, cytoplasmic 1
chr10	4435642	4435980	diffreps_chr10_4435641_4435980	1.79	9.58e-09	1.5e-07	Intron (NM_001046456/539350, intron 1 of 1)	10	4427216	4444604	17389	2	8624	ENSBTAG00000002357	TICAM2	toll like receptor adaptor molecule 2
chr10	44806322	44806640	diffreps_chr10_44806321_44806640	1.06	0.000124472	0.000869265	Distal Intergenic	10	44831891	44846459	14569	1	-25251	ENSBTAG00000021944	RTRAF	RNA transcription, translation and transport factor
chr10	45346302	45347560	diffreps_chr10_45346301_45347560	2.19	0	0	Distal Intergenic	10	45366519	45379630	13112	1	-18959	ENSBTAG00000015806	OAZ2	ornithine decarboxylase antizyme 2
chr10	46399962	46400420	diffreps_chr10_46399961_46400420	1.05	8.28e-08	1.09e-06	Downstream (2-3kb)	10	46403393	46407884	4492	2	7464	ENSBTAG00000008807	FBXL22	F-box and leucine rich repeat protein 22
chr10	46961762	46962260	diffreps_chr10_46961761_46962260	1.06	8.03e-08	1.07e-06	Distal Intergenic	10	46905306	46923194	17889	2	-38568	ENSBTAG00000017373	LACTB	lactamase beta
chr10	51167962	51168540	diffreps_chr10_51167961_51168540	1.65	2e-15	8.1e-14	Distal Intergenic	10	51184636	51209336	24701	2	40796	ENSBTAG00000005269	CCNB2	cyclin B2
chr10	52010642	52011020	diffreps_chr10_52010641_52011020	1.41	2.95e-07	3.53e-06	Distal Intergenic	10	52087959	52135881	47923	2	124861	ENSBTAG00000013452	AQP9	aquaporin 9
chr10	58215122	58215580	diffreps_chr10_58215121_58215580	1.09	1.5e-07	1.9e-06	Exon (NM_001099070/535365, exon 6 of 11)	10	58192166	58224910	32745	1	22956	ENSBTAG00000003762	GNB5	G protein subunit beta 5
chr10	60102782	60103040	diffreps_chr10_60102781_60103040	1.04	0.00052487	0.00311537	Distal Intergenic	10	60016671	60070656	53986	2	-32126	ENSBTAG00000004303	SLC27A2	solute carrier family 27 member 2
chr10	60855622	60855820	diffreps_chr10_60855621_60855820	1.52	0.00010109	0.000719635	Distal Intergenic	10	60792964	60853218	60255	2	-2404	ENSBTAG00000051898	FGF7	fibroblast growth factor 7
chr10	64869122	64869760	diffreps_chr10_64869121_64869760	1.28	1.55e-14	5.63e-13	Distal Intergenic	10	64811081	64864862	53782	2	-4260	ENSBTAG00000010365	SQOR	sulfide quinone oxidoreductase
chr10	64993142	64993720	diffreps_chr10_64993141_64993720	1.01	4.37e-08	6.06e-07	Distal Intergenic	10	65015857	65015936	80	2	22216	ENSBTAG00000036401	MIR147	microRNA mir-147
chr10	65065702	65065900	diffreps_chr10_65065701_65065900	2.77	1.01e-08	1.57e-07	Distal Intergenic	10	65036629	65057009	20381	2	-8693	ENSBTAG00000018279	SPATA5L1	spermatogenesis associated 5 like 1
chr10	65400842	65401220	diffreps_chr10_65400841_65401220	1.56	3.14e-08	4.48e-07	Distal Intergenic	10	65347830	65382007	34178	2	-18835	ENSBTAG00000025496	SORD	sorbitol dehydrogenase
chr10	65505222	65506360	diffreps_chr10_65505221_65506360	1.44	0	0	Distal Intergenic	10	65537749	65613540	75792	2	107180	ENSBTAG00000014501	FERMT2	fermitin family member 2
chr10	66963442	66963900	diffreps_chr10_66963441_66963900	1.52	1.11e-10	2.35e-09	Promoter (1-2kb)	10	66946896	66961759	14864	2	-1683	ENSBTAG00000019500	CNIH1	cornichon family AMPA receptor auxiliary protein 1
chr10	67278502	67279240	diffreps_chr10_67278501_67279240	1.46	2.93e-14	1.03e-12	Intron (NM_001206853/540852, intron 10 of 11)	10	67073820	67073889	70	1	204682	ENSBTAG00000044921	MIR2292	microRNA mir-2292
chr10	67305922	67306120	diffreps_chr10_67305921_67306120	1.68	2.89e-05	0.000234008	Distal Intergenic	10	67450966	67504493	53528	2	198373	ENSBTAG00000019120	WDHD1	WD repeat and HMG-box DNA binding protein 1
chr10	73578222	73578780	diffreps_chr10_73578221_73578780	1.81	5.11e-15	1.97e-13	Intron (NM_001076863/518542, intron 9 of 13)	10	73436691	73667844	231154	1	141531	ENSBTAG00000003276	PRKCH	protein kinase C eta
chr10	73959782	73960080	diffreps_chr10_73959781_73960080	2.12	4.51e-09	7.48e-08	Distal Intergenic	10	73888973	73918567	29595	1	70809	ENSBTAG00000020937	SNAPC1	small nuclear RNA activating complex polypeptide 1
chr10	76550822	76551380	diffreps_chr10_76550821_76551380	1.61	6.99e-15	2.65e-13	Intron (NM_001083477/534382, intron 1 of 27)	10	76546544	76607077	60534	1	4278	ENSBTAG00000009641	MTHFD1	methylenetetrahydrofolate dehydrogenase, cyclohydrolase and formyltetrahydrofolate synthetase 1
chr10	76771782	76772160	diffreps_chr10_76771781_76772160	1.3	4.49e-07	5.17e-06	Distal Intergenic	10	76679952	76681862	1911	1	91830	ENSBTAG00000007807	HSPA2	heat shock protein family A (Hsp70) member 2
chr10	76898602	76899300	diffreps_chr10_76898601_76899300	1.2	4.88e-15	1.89e-13	Distal Intergenic	10	76870226	76885380	15155	1	28376	ENSBTAG00000001551	PLEKHG3	pleckstrin homology and RhoGEF domain containing G3
chr10	76899342	76900620	diffreps_chr10_76899341_76900620	1.51	0	0	Distal Intergenic	10	76870226	76885380	15155	1	29116	ENSBTAG00000001551	PLEKHG3	pleckstrin homology and RhoGEF domain containing G3
chr10	76903022	76904180	diffreps_chr10_76903021_76904180	1.66	0	0	Distal Intergenic	10	76870226	76885380	15155	1	32796	ENSBTAG00000001551	PLEKHG3	pleckstrin homology and RhoGEF domain containing G3
chr10	76910582	76910820	diffreps_chr10_76910581_76910820	1.02	0.00156335	0.0080558	Distal Intergenic	10	76870226	76885380	15155	1	40356	ENSBTAG00000001551	PLEKHG3	pleckstrin homology and RhoGEF domain containing G3
chr10	76961562	76962100	diffreps_chr10_76961561_76962100	1.89	6.63e-13	1.96e-11	Distal Intergenic	10	77048119	77066488	18370	1	-86019	ENSBTAG00000003469	CHURC1	churchill domain containing 1
chr10	77081802	77082180	diffreps_chr10_77081801_77082180	1.41	4.34e-07	5.02e-06	Intron (NM_001046538/614507, intron 2 of 6)	10	77069493	77073117	3625	2	-8685	NA	GPX2	glutathione peroxidase 2
chr10	77082982	77083500	diffreps_chr10_77082981_77083500	1.43	1.36e-09	2.44e-08	Intron (NM_001046538/614507, intron 1 of 6)	10	77069493	77073117	3625	2	-9865	NA	GPX2	glutathione peroxidase 2
chr10	79399442	79399940	diffreps_chr10_79399441_79399940	1.41	9.93e-09	1.55e-07	Distal Intergenic	10	79345987	79368994	23008	2	-30448	ENSBTAG00000012900	TMEM229B	transmembrane protein 229B
chr10	79461122	79461540	diffreps_chr10_79461121_79461540	1.35	4.06e-08	5.66e-07	Distal Intergenic	10	79466239	79474711	8473	2	13171	ENSBTAG00000018299	PIGH	phosphatidylinositol glycan anchor biosynthesis class H
chr10	80648582	80649400	diffreps_chr10_80648581_80649400	1.92	0	0	Distal Intergenic	10	80614623	80620115	5493	2	-28467	ENSBTAG00000025434	ZFP36L1	ZFP36 ring finger protein like 1
chr10	80663762	80664260	diffreps_chr10_80663761_80664260	1.46	5.42e-10	1.03e-08	Distal Intergenic	10	80614623	80620115	5493	2	-43647	ENSBTAG00000025434	ZFP36L1	ZFP36 ring finger protein like 1
chr10	80703402	80703960	diffreps_chr10_80703401_80703960	1.54	2.03e-12	5.58e-11	Exon (NM_001035351/524770, exon 4 of 21)	10	80672881	80770957	98077	2	66997	ENSBTAG00000018255	ACTN1	actinin alpha 1
chr10	81278142	81278340	diffreps_chr10_81278141_81278340	1.63	3.3e-05	0.000263193	Distal Intergenic	10	81245510	81276266	30757	1	32632	ENSBTAG00000008576	PLEKHD1	pleckstrin homology and coiled-coil domain containing D1
chr10	81326122	81326580	diffreps_chr10_81326121_81326580	1.13	4.79e-08	6.6e-07	Distal Intergenic	10	81245510	81276266	30757	1	80612	ENSBTAG00000008576	PLEKHD1	pleckstrin homology and coiled-coil domain containing D1
chr10	81339882	81340600	diffreps_chr10_81339881_81340600	2.6	0	0	Distal Intergenic	10	81245510	81276266	30757	1	94372	ENSBTAG00000008576	PLEKHD1	pleckstrin homology and coiled-coil domain containing D1
chr10	81340902	81341340	diffreps_chr10_81340901_81341340	1.06	1.83e-06	1.89e-05	Distal Intergenic	10	81245510	81276266	30757	1	95392	ENSBTAG00000008576	PLEKHD1	pleckstrin homology and coiled-coil domain containing D1
chr10	81450722	81451220	diffreps_chr10_81450721_81451220	1.3	8.34e-09	1.32e-07	Distal Intergenic	10	81495943	81501106	5164	1	-44723	ENSBTAG00000011596	SRSF5	serine and arginine rich splicing factor 5
chr10	82725702	82726380	diffreps_chr10_82725701_82726380	1.44	0	0	Distal Intergenic	10	82375960	82454532	78573	2	-271170	ENSBTAG00000005700	MAP3K9	mitogen-activated protein kinase kinase kinase 9
chr10	82877002	82877240	diffreps_chr10_82877001_82877240	1.02	0.00156335	0.0080558	Distal Intergenic	10	83129251	83129851	601	2	252611	ENSBTAG00000006963	RPL12	ribosomal protein L12
chr10	8297042	8297260	diffreps_chr10_8297041_8297260	2.17	2.45e-07	2.98e-06	Distal Intergenic	10	8176687	8223030	46344	1	120355	ENSBTAG00000034823	AGGF1	angiogenic factor with G-patch and FHA domains 1
chr10	83299482	83299760	diffreps_chr10_83299481_83299760	1.02	0.000260282	0.00167403	Distal Intergenic	10	83129251	83129851	601	2	-169631	ENSBTAG00000006963	RPL12	ribosomal protein L12
chr10	83477382	83477620	diffreps_chr10_83477381_83477620	2.48	2.23e-09	3.86e-08	Distal Intergenic	10	83129251	83129851	601	2	-347531	ENSBTAG00000006963	RPL12	ribosomal protein L12
chr10	84016422	84016920	diffreps_chr10_84016421_84016920	1.28	5.14e-10	9.78e-09	Distal Intergenic	10	84446657	84480440	33784	1	-429737	ENSBTAG00000008713	DCAF4	DDB1 and CUL4 associated factor 4
chr10	85136322	85136900	diffreps_chr10_85136321_85136900	1.18	4.92e-09	8.11e-08	Distal Intergenic	10	85120765	85123417	2653	2	-12905	ENSBTAG00000009271	PNMA1	PNMA family member 1
chr10	85616282	85617060	diffreps_chr10_85616281_85617060	1.12	3.84e-13	1.17e-11	Intron (NM_001193250/528647, intron 3 of 4)	10	85599605	85618776	19172	1	16677	ENSBTAG00000014632	VSX2	visual system homeobox 2
chr10	85796122	85796760	diffreps_chr10_85796121_85796760	1.97	0	0	Exon (NM_174385/281905, exon 29 of 36)	10	85783972	85785721	1750	1	12150	ENSBTAG00000021956	ISCA2	iron-sulfur cluster assembly 2
chr10	85796902	85797960	diffreps_chr10_85796901_85797960	1.07	0	0	Exon (NM_174385/281905, exon 28 of 36)	10	85783972	85785721	1750	1	12930	ENSBTAG00000021956	ISCA2	iron-sulfur cluster assembly 2
chr10	85894902	85895560	diffreps_chr10_85894901_85895560	1.04	6.19e-11	1.37e-09	Intron (NM_174385/281905, intron 1 of 35)	10	85791017	85898441	107425	2	2881	ENSBTAG00000021957	LTBP2	latent transforming growth factor beta binding protein 2
chr10	86113502	86114040	diffreps_chr10_86113501_86114040	1.21	8.6e-09	1.36e-07	Intron (NM_001192679/529720, intron 1 of 3)	10	86108354	86116785	8432	2	2745	ENSBTAG00000015052	PROX2	prospero homeobox 2
chr10	86158042	86158340	diffreps_chr10_86158041_86158340	1.04	8.89e-05	0.000642989	3' UTR	10	86158264	86174154	15891	2	15814	ENSBTAG00000006688	RPS6KL1	ribosomal protein S6 kinase like 1
chr10	86166182	86166600	diffreps_chr10_86166181_86166600	1.6	7.24e-10	1.35e-08	Intron (NM_001037472/530047, intron 4 of 9)	10	86158264	86174154	15891	2	7554	ENSBTAG00000006688	RPS6KL1	ribosomal protein S6 kinase like 1
chr10	86204322	86205760	diffreps_chr10_86204321_86205760	1.4	0	0	Exon (NM_173950/280894, exon 5 of 6)	10	86200949	86214059	13111	2	8299	ENSBTAG00000013688	PGF	placental growth factor
chr10	86337262	86337700	diffreps_chr10_86337261_86337700	1.11	2.86e-07	3.43e-06	Exon (NM_001206060/534652, exon 20 of 22)	10	86307309	86313592	6284	2	-23670	ENSBTAG00000013992	ACYP1	acylphosphatase 1
chr10	86373702	86374080	diffreps_chr10_86373701_86374080	1.42	4.03e-07	4.69e-06	3' UTR	10	86332450	86367622	35173	2	-6080	ENSBTAG00000016612	NEK9	NIMA related kinase 9
chr10	86379882	86380340	diffreps_chr10_86379881_86380340	1.43	1.85e-08	2.75e-07	Intron (NM_001040549/529761, intron 3 of 5)	10	86332450	86367622	35173	2	-12260	ENSBTAG00000016612	NEK9	NIMA related kinase 9
chr10	86510082	86510700	diffreps_chr10_86510081_86510700	1.1	1.27e-11	3.1e-10	Distal Intergenic	10	86488949	86492375	3427	1	21133	ENSBTAG00000004322	FOS	Fos proto-oncogene, AP-1 transcription factor subunit
chr10	86511822	86512840	diffreps_chr10_86511821_86512840	1.32	0	0	Distal Intergenic	10	86488949	86492375	3427	1	22873	ENSBTAG00000004322	FOS	Fos proto-oncogene, AP-1 transcription factor subunit
chr10	86677802	86678080	diffreps_chr10_86677801_86678080	2.98	9.38e-12	2.33e-10	Distal Intergenic	10	86714161	86736110	21950	1	-36081	ENSBTAG00000025405	BATF	basic leucine zipper ATF-like transcription factor
chr10	86679362	86679560	diffreps_chr10_86679361_86679560	2.63	1.63e-08	2.44e-07	Distal Intergenic	10	86714161	86736110	21950	1	-34601	ENSBTAG00000025405	BATF	basic leucine zipper ATF-like transcription factor
chr10	86745802	86746260	diffreps_chr10_86745801_86746260	3.39	0	0	Distal Intergenic	10	86764532	86818617	54086	1	-18272	ENSBTAG00000040078	FLVCR2	feline leukemia virus subgroup C cellular receptor family, member 2
chr10	86762902	86763300	diffreps_chr10_86762901_86763300	1.03	4.79e-07	5.49e-06	Promoter (1-2kb)	10	86764532	86818617	54086	1	-1232	ENSBTAG00000040078	FLVCR2	feline leukemia virus subgroup C cellular receptor family, member 2
chr10	86814342	86814640	diffreps_chr10_86814341_86814640	3.65	1.38e-14	5.02e-13	Intron (NM_001192143/507318, intron 10 of 10)	10	86764532	86818617	54086	1	49810	ENSBTAG00000040078	FLVCR2	feline leukemia virus subgroup C cellular receptor family, member 2
chr10	88113722	88114640	diffreps_chr10_88113721_88114640	1.16	2.33e-15	9.41e-14	Distal Intergenic	10	88017741	88039635	21895	1	95981	ENSBTAG00000008735	VASH1	vasohibin 1
chr10	88121102	88121720	diffreps_chr10_88121101_88121720	2.88	0	0	Distal Intergenic	10	88017741	88039635	21895	1	103361	ENSBTAG00000008735	VASH1	vasohibin 1
chr10	88149522	88150100	diffreps_chr10_88149521_88150100	2.88	0	0	Distal Intergenic	10	88017741	88039635	21895	1	131781	ENSBTAG00000008735	VASH1	vasohibin 1
chr10	88259362	88260020	diffreps_chr10_88259361_88260020	2.4	0	0	Distal Intergenic	10	88298760	88314448	15689	1	-38740	ENSBTAG00000009923	CIPC	CLOCK interacting pacemaker
chr10	88274002	88274440	diffreps_chr10_88274001_88274440	1.76	4.84e-11	1.08e-09	Distal Intergenic	10	88298760	88314448	15689	1	-24320	ENSBTAG00000009923	CIPC	CLOCK interacting pacemaker
chr10	88275402	88276540	diffreps_chr10_88275401_88276540	1.63	0	0	Distal Intergenic	10	88298760	88314448	15689	1	-22220	ENSBTAG00000009923	CIPC	CLOCK interacting pacemaker
chr10	88280942	88281340	diffreps_chr10_88280941_88281340	1.5	4.21e-08	5.85e-07	Distal Intergenic	10	88298760	88314448	15689	1	-17420	ENSBTAG00000009923	CIPC	CLOCK interacting pacemaker
chr11	100112602	100113140	diffreps_chr11_100112601_100113140	1.05	3.04e-11	7.03e-10	Distal Intergenic	11	100121988	100133425	11438	2	20285	ENSBTAG00000019453	PTGES	prostaglandin E synthase
chr11	100262082	100262500	diffreps_chr11_100262081_100262500	1.16	1.48e-06	1.55e-05	Downstream (1-2kb)	11	100215024	100259217	44194	1	47058	ENSBTAG00000020311	USP20	ubiquitin specific peptidase 20
chr11	100544722	100545040	diffreps_chr11_100544721_100545040	2.91	4.82e-13	1.45e-11	Distal Intergenic	11	100410491	100462717	52227	1	134231	ENSBTAG00000004204	GPR107	G protein-coupled receptor 107
chr11	100552082	100552580	diffreps_chr11_100552081_100552580	1.2	7.54e-08	1e-06	Distal Intergenic	11	100410491	100462717	52227	1	141591	ENSBTAG00000004204	GPR107	G protein-coupled receptor 107
chr11	100773522	100773740	diffreps_chr11_100773521_100773740	4.29	5.45e-13	1.63e-11	Intron (NM_173892/280726, intron 1 of 14)	11	100770227	100822223	51997	1	3295	ENSBTAG00000020747	ASS1	argininosuccinate synthase 1
chr11	100968042	100968780	diffreps_chr11_100968041_100968780	1.57	0	0	Distal Intergenic	11	100975472	100984308	8837	1	-6692	ENSBTAG00000048071	EXOSC2	exosome component 2
chr11	101222062	101222660	diffreps_chr11_101222061_101222660	1.05	3.9e-12	1.04e-10	Distal Intergenic	11	101296774	101321916	25143	1	-74114	ENSBTAG00000052140	AIF1L	allograft inflammatory factor 1 like
chr11	10157242	10158120	diffreps_chr11_10157241_10158120	1.56	0	0	Promoter (1-2kb)	11	10159213	10162300	3088	1	-1093	ENSBTAG00000016599	MRPL53	mitochondrial ribosomal protein L53
chr11	101706182	101707220	diffreps_chr11_101706181_101707220	1.32	0	0	Exon (NM_001205872/520454, exon 15 of 24)	11	101639652	101645059	5408	2	-61123	ENSBTAG00000010810	UCK1	uridine-cytidine kinase 1
chr11	101862142	101862860	diffreps_chr11_101862141_101862860	1.06	7.66e-12	1.93e-10	Distal Intergenic	11	101698360	101808698	110339	2	-53444	ENSBTAG00000020791	RAPGEF1	Rap guanine nucleotide exchange factor 1
chr11	101887522	101887980	diffreps_chr11_101887521_101887980	1.38	4.17e-10	8.03e-09	Distal Intergenic	11	101698360	101808698	110339	2	-78824	ENSBTAG00000020791	RAPGEF1	Rap guanine nucleotide exchange factor 1
chr11	102257982	102258900	diffreps_chr11_102257981_102258900	1.48	0	0	Intron (NM_001099025/523720, intron 1 of 6)	11	102255186	102322577	67392	1	2796	ENSBTAG00000007235	NTNG2	netrin G2
chr11	102315742	102317260	diffreps_chr11_102315741_102317260	1.02	0	0	Intron (NM_001099025/523720, intron 4 of 6)	11	102255186	102322577	67392	1	60556	ENSBTAG00000007235	NTNG2	netrin G2
chr11	102322362	102322880	diffreps_chr11_102322361_102322880	1.37	8.93e-10	1.64e-08	3' UTR	11	102255186	102322577	67392	1	67176	ENSBTAG00000007235	NTNG2	netrin G2
chr11	102485522	102486140	diffreps_chr11_102485521_102486140	1.16	9.18e-10	1.68e-08	Distal Intergenic	11	102457145	102480273	23129	2	-5249	ENSBTAG00000018710	TTF1	transcription termination factor 1
chr11	102486802	102487000	diffreps_chr11_102486801_102487000	2.18	6.17e-07	6.92e-06	Distal Intergenic	11	102457145	102480273	23129	2	-6529	ENSBTAG00000018710	TTF1	transcription termination factor 1
chr11	102934702	102935300	diffreps_chr11_102934701_102935300	1.38	2.22e-16	9.84e-15	Distal Intergenic	11	102911379	102922537	11159	1	23323	ENSBTAG00000005189	SPACA9	sperm acrosome associated 9
chr11	102990682	102991380	diffreps_chr11_102990681_102991380	1.15	4.56e-13	1.38e-11	Distal Intergenic	11	102999730	103012074	12345	1	-8350	ENSBTAG00000012772	GFI1B	growth factor independent 1B transcriptional repressor
chr11	102998522	102998940	diffreps_chr11_102998521_102998940	1.11	1.17e-06	1.24e-05	Promoter (<=1kb)	11	102999730	103012074	12345	1	-790	ENSBTAG00000012772	GFI1B	growth factor independent 1B transcriptional repressor
chr11	103031402	103031880	diffreps_chr11_103031401_103031880	1.18	2.79e-08	4.02e-07	Distal Intergenic	11	103037536	103056301	18766	1	-5656	ENSBTAG00000021373	GTF3C5	general transcription factor IIIC subunit 5
chr11	103197002	103197440	diffreps_chr11_103197001_103197440	1.5	1.33e-09	2.38e-08	Distal Intergenic	11	103136837	103147226	10390	2	-49776	ENSBTAG00000030319	GBGT1	globoside alpha-1,3-N-acetylgalactosaminyltransferase 1
chr11	103307682	103308420	diffreps_chr11_103307681_103308420	1.54	0	0	Distal Intergenic	11	103271491	103279630	8140	2	-28052	ENSBTAG00000020249	GLT6D1	glycosyltransferase 6 domain containing 1
chr11	103308902	103309260	diffreps_chr11_103308901_103309260	3.98	0	0	Distal Intergenic	11	103271491	103279630	8140	2	-29272	ENSBTAG00000020249	GLT6D1	glycosyltransferase 6 domain containing 1
chr11	103484662	103486920	diffreps_chr11_103484661_103486920	1.53	0	0	Distal Intergenic	11	103462730	103481881	19152	2	-2781	ENSBTAG00000039851	UBAC1	UBA domain containing 1
chr11	103513262	103514500	diffreps_chr11_103513261_103514500	1.23	0	0	Distal Intergenic	11	103462730	103481881	19152	2	-31381	ENSBTAG00000039851	UBAC1	UBA domain containing 1
chr11	103619082	103621220	diffreps_chr11_103619081_103621220	1.31	0	0	Distal Intergenic	11	103518768	103553637	34870	2	-65445	ENSBTAG00000020490	NACC2	NACC family member 2
chr11	103629182	103629600	diffreps_chr11_103629181_103629600	1.15	2.15e-06	2.18e-05	Distal Intergenic	11	103681199	103687920	6722	2	58320	ENSBTAG00000011124	LHX3	LIM homeobox 3
chr11	103775682	103776040	diffreps_chr11_103775681_103776040	2.11	1.16e-10	2.46e-09	Distal Intergenic	11	103824069	103831134	7066	2	55094	ENSBTAG00000006572	CARD9	caspase recruitment domain family member 9
chr11	103776962	103777880	diffreps_chr11_103776961_103777880	1.75	0	0	Distal Intergenic	11	103824069	103831134	7066	2	53254	ENSBTAG00000006572	CARD9	caspase recruitment domain family member 9
chr11	103922622	103924380	diffreps_chr11_103922621_103924380	1.11	0	0	Distal Intergenic	11	103877002	103884957	7956	2	-37665	ENSBTAG00000001354	INPP5E	inositol polyphosphate-5-phosphatase E
chr11	104065242	104066100	diffreps_chr11_104065241_104066100	2.42	0	0	Distal Intergenic	11	104078014	104087184	9171	1	-11914	ENSBTAG00000030278	EGFL7	EGF like domain multiple 7
chr11	104080882	104081260	diffreps_chr11_104080881_104081260	1.41	2.95e-07	3.53e-06	Intron (NM_001078038/613671, intron 2 of 9)	11	104078014	104087184	9171	1	2868	ENSBTAG00000030278	EGFL7	EGF like domain multiple 7
chr11	104089562	104089920	diffreps_chr11_104089561_104089920	2.68	6.67e-14	2.23e-12	Intron (NM_001080264/512112, intron 4 of 5)	11	104085473	104085545	73	1	4089	ENSBTAG00000029979	MIR126	microRNA mir-126
chr11	104090342	104090740	diffreps_chr11_104090341_104090740	1.19	6.66e-07	7.42e-06	Intron (NM_001080264/512112, intron 4 of 5)	11	104085473	104085545	73	1	4869	ENSBTAG00000029979	MIR126	microRNA mir-126
chr11	104106222	104107380	diffreps_chr11_104106221_104107380	1.06	0	0	Distal Intergenic	11	104087838	104100209	12372	2	-6013	ENSBTAG00000025161	AGPAT2	1-acylglycerol-3-phosphate O-acyltransferase 2
chr11	104136422	104136780	diffreps_chr11_104136421_104136780	2.73	1.78e-14	6.4e-13	Distal Intergenic	11	104087838	104100209	12372	2	-36213	ENSBTAG00000025161	AGPAT2	1-acylglycerol-3-phosphate O-acyltransferase 2
chr11	104137262	104137700	diffreps_chr11_104137261_104137700	1.35	1.09e-10	2.32e-09	Distal Intergenic	11	104087838	104100209	12372	2	-37053	ENSBTAG00000025161	AGPAT2	1-acylglycerol-3-phosphate O-acyltransferase 2
chr11	104167202	104168160	diffreps_chr11_104167201_104168160	1.25	0	0	Distal Intergenic	11	104176838	104214721	37884	2	46561	ENSBTAG00000012525	ABO	ABO, alpha 1-3-N-acetylgalactosaminyltransferase and alpha 1-3-galactosyltransferase
chr11	104241602	104242460	diffreps_chr11_104241601_104242460	2.04	0	0	Exon (NM_001075529/511610, exon 3 of 5)	11	104240170	104246931	6762	2	4471	ENSBTAG00000011554	SURF6	surfeit 6
chr11	104377822	104378860	diffreps_chr11_104377821_104378860	3.25	0	0	Distal Intergenic	11	104361570	104368819	7250	2	-9003	ENSBTAG00000001824	SLC2A6	solute carrier family 2 member 6
chr11	104572602	104574120	diffreps_chr11_104572601_104574120	1.41	0	0	Intron (NM_001193041/614603, intron 7 of 21)	11	104522793	104581977	59185	2	7857	ENSBTAG00000004510	SARDH	sarcosine dehydrogenase
chr11	104887862	104888400	diffreps_chr11_104887861_104888400	1.14	3.46e-10	6.77e-09	Distal Intergenic	11	104869397	104883126	13730	1	18465	ENSBTAG00000047031	WDR5	WD repeat domain 5
chr11	104892142	104892680	diffreps_chr11_104892141_104892680	1.26	2.31e-09	3.99e-08	Distal Intergenic	11	104869397	104883126	13730	1	22745	ENSBTAG00000047031	WDR5	WD repeat domain 5
chr11	105116282	105117240	diffreps_chr11_105116281_105117240	1.04	0	0	Distal Intergenic	11	105086960	105114880	27921	1	29322	ENSBTAG00000017851	RXRA	retinoid X receptor alpha
chr11	105339822	105340120	diffreps_chr11_105339821_105340120	3.15	1.41e-13	4.53e-12	Distal Intergenic	11	105441661	105450278	8618	2	110158	ENSBTAG00000048155	FCN1	ficolin 1
chr11	105734182	105735100	diffreps_chr11_105734181_105735100	1.21	0	0	Distal Intergenic	11	105816639	105821180	4542	2	86080	ENSBTAG00000049410	C11H9orf116	chromosome 11 C9orf116 homolog
chr11	105735162	105736580	diffreps_chr11_105735161_105736580	1.63	0	0	Distal Intergenic	11	105816639	105821180	4542	2	84600	ENSBTAG00000049410	C11H9orf116	chromosome 11 C9orf116 homolog
chr11	105781462	105782180	diffreps_chr11_105781461_105782180	1.29	0	0	Distal Intergenic	11	105816639	105821180	4542	2	39000	ENSBTAG00000049410	C11H9orf116	chromosome 11 C9orf116 homolog
chr11	105854462	105855100	diffreps_chr11_105854461_105855100	1.49	6.42e-13	1.9e-11	Distal Intergenic	11	105822041	105825257	3217	1	32421	ENSBTAG00000005688	MRPS2	mitochondrial ribosomal protein S2
chr11	105867562	105867760	diffreps_chr11_105867561_105867760	3	1.46e-09	2.59e-08	Distal Intergenic	11	105895740	105897520	1781	1	-27980	ENSBTAG00000013889	TMEM141	transmembrane protein 141
chr11	105868742	105869420	diffreps_chr11_105868741_105869420	1.62	4.6e-14	1.58e-12	Distal Intergenic	11	105895740	105897520	1781	1	-26320	ENSBTAG00000013889	TMEM141	transmembrane protein 141
chr11	105920402	105921580	diffreps_chr11_105920401_105921580	1.39	0	0	Exon (NM_001076817/508218, exon 6 of 15)	11	105908984	105928079	19096	1	11418	ENSBTAG00000039573	RABL6	RAB, member RAS oncogene family like 6
chr11	105928482	105929260	diffreps_chr11_105928481_105929260	1.4	0	0	Distal Intergenic	11	105936889	105938333	1445	1	-7629	ENSBTAG00000050722	PHPT1	phosphohistidine phosphatase 1
chr11	105929862	105930420	diffreps_chr11_105929861_105930420	3.03	0	0	Distal Intergenic	11	105936889	105938333	1445	1	-6469	ENSBTAG00000050722	PHPT1	phosphohistidine phosphatase 1
chr11	105930862	105931080	diffreps_chr11_105930861_105931080	1.42	5.93e-05	0.000447052	Distal Intergenic	11	105936889	105938333	1445	1	-5809	ENSBTAG00000050722	PHPT1	phosphohistidine phosphatase 1
chr11	105956382	105958620	diffreps_chr11_105956381_105958620	1.48	0	0	Distal Intergenic	11	105948291	105952197	3907	2	-4185	ENSBTAG00000030302	EDF1	endothelial differentiation related factor 1
chr11	105980142	105981700	diffreps_chr11_105980141_105981700	1.34	0	0	3' UTR	11	105981080	105985321	4242	2	3621	ENSBTAG00000010515	FBXW5	F-box and WD repeat domain containing 5
chr11	106022222	106022580	diffreps_chr11_106022221_106022580	1.08	0.000121478	0.000850948	Promoter (<=1kb)	11	106021915	106024969	3055	1	307	ENSBTAG00000015074	PTGDS	prostaglandin D2 synthase
chr11	106029602	106030420	diffreps_chr11_106029601_106030420	1.52	0	0	Distal Intergenic	11	106021915	106024969	3055	1	7687	ENSBTAG00000015074	PTGDS	prostaglandin D2 synthase
chr11	106044422	106044980	diffreps_chr11_106044421_106044980	1.08	4.83e-09	7.96e-08	Promoter (<=1kb)	11	106039204	106043647	4444	2	-775	ENSBTAG00000015085	CLIC3	chloride intracellular channel 3
chr11	106066022	106066640	diffreps_chr11_106066021_106066640	1.01	7.89e-09	1.26e-07	Downstream (1-2kb)	11	106067965	106069085	1121	2	2445	ENSBTAG00000046516	FUT7	fucosyltransferase 7
chr11	106070982	106073740	diffreps_chr11_106070981_106073740	1.56	0	0	Promoter (1-2kb)	11	106067965	106069085	1121	2	-1897	ENSBTAG00000046516	FUT7	fucosyltransferase 7
chr11	106085242	106085760	diffreps_chr11_106085241_106085760	1.15	4.64e-10	8.88e-09	Promoter (<=1kb)	11	106080957	106086455	5499	2	695	ENSBTAG00000048125	ENTPD2	ectonucleoside triphosphate diphosphohydrolase 2
chr11	106384022	106384480	diffreps_chr11_106384021_106384480	1.28	6.28e-09	1.02e-07	Distal Intergenic	11	106405333	106414270	8938	1	-20853	ENSBTAG00000012121	NOXA1	NADPH oxidase activator 1
chr11	106432142	106433480	diffreps_chr11_106432141_106433480	1.06	0	0	Distal Intergenic	11	106414233	106418732	4500	2	-13410	ENSBTAG00000030246	ENTPD8	ectonucleoside triphosphate diphosphohydrolase 8
chr11	106544102	106544980	diffreps_chr11_106544101_106544980	1.62	0	0	Distal Intergenic	11	106567629	106575152	7524	1	-22649	ENSBTAG00000012147	ARRDC1	arrestin domain containing 1
chr11	106606382	106607420	diffreps_chr11_106606381_106607420	1.15	0	0	Intron (NM_001099041/528606, intron 1 of 26)	11	106578540	106687699	109160	1	27842	ENSBTAG00000012148	EHMT1	euchromatic histone lysine methyltransferase 1
chr11	11277062	11277320	diffreps_chr11_11277061_11277320	2.19	2.14e-08	3.14e-07	Distal Intergenic	11	11220302	11232127	11826	2	-44935	ENSBTAG00000008764	SMYD5	SMYD family member 5
chr11	11284462	11284880	diffreps_chr11_11284461_11284880	1.23	1.63e-08	2.45e-07	Distal Intergenic	11	11326325	11369717	43393	1	-41445	ENSBTAG00000006162	RAB11FIP5	RAB11 family interacting protein 5
chr11	11442962	11444360	diffreps_chr11_11442961_11444360	1.27	0	0	Intron (NM_001075914/528468, intron 9 of 11)	11	11371651	11498288	126638	1	71311	ENSBTAG00000050078	SFXN5	sideroflexin 5
chr11	11466822	11467340	diffreps_chr11_11466821_11467340	1.5	4.02e-13	1.22e-11	Intron (NM_001075914/528468, intron 10 of 11)	11	11505904	11523111	17208	2	55771	ENSBTAG00000001866	EMX1	empty spiracles homeobox 1
chr11	11467842	11468340	diffreps_chr11_11467841_11468340	2.89	0	0	Intron (NM_001075914/528468, intron 10 of 11)	11	11505904	11523111	17208	2	54771	ENSBTAG00000001866	EMX1	empty spiracles homeobox 1
chr11	11545822	11546680	diffreps_chr11_11545821_11546680	1.14	1.33e-15	5.52e-14	Downstream (1-2kb)	11	11548553	11556680	8128	2	10000	ENSBTAG00000021961	SPR	sepiapterin reductase
chr11	11555342	11555760	diffreps_chr11_11555341_11555760	2.4	1.31e-14	4.79e-13	Promoter (<=1kb)	11	11548553	11556680	8128	2	920	ENSBTAG00000021961	SPR	sepiapterin reductase
chr11	12374362	12374860	diffreps_chr11_12374361_12374860	1.14	1.64e-08	2.45e-07	Distal Intergenic	11	12377631	12393491	15861	1	-2771	ENSBTAG00000012212	CYP26B1	cytochrome P450, family 26, subfamily B, polypeptide 1
chr11	12387942	12388520	diffreps_chr11_12387941_12388520	1.42	7.54e-12	1.91e-10	Intron (NM_001192793/540868, intron 2 of 5)	11	12377631	12393491	15861	1	10311	ENSBTAG00000012212	CYP26B1	cytochrome P450, family 26, subfamily B, polypeptide 1
chr11	12599662	12600060	diffreps_chr11_12599661_12600060	1.11	5.82e-07	6.57e-06	Distal Intergenic	11	12377631	12393491	15861	1	222031	ENSBTAG00000012212	CYP26B1	cytochrome P450, family 26, subfamily B, polypeptide 1
chr11	12971042	12971320	diffreps_chr11_12971041_12971320	1.09	0.00034897	0.00217767	Intron (NM_001102490/508157, intron 36 of 56)	11	12899569	13123869	224301	2	152549	ENSBTAG00000013290	DYSF	dysferlin
chr11	13470022	13470560	diffreps_chr11_13470021_13470560	3.28	0	0	Intron (NM_176654/338059, intron 2 of 13)	11	13454346	13480401	26056	2	9841	ENSBTAG00000010620	ATP6V1B1	ATPase H+ transporting V1 subunit B1
chr11	13470662	13471140	diffreps_chr11_13470661_13471140	1.84	8.31e-12	2.09e-10	Intron (NM_176654/338059, intron 2 of 13)	11	13454346	13480401	26056	2	9261	ENSBTAG00000010620	ATP6V1B1	ATPase H+ transporting V1 subunit B1
chr11	14150302	14150520	diffreps_chr11_14150301_14150520	1.3	0.000248264	0.00160619	Promoter (<=1kb)	11	14150184	14154628	4445	1	118	ENSBTAG00000008674	FAM136A	family with sequence similarity 136 member A
chr11	15473182	15473680	diffreps_chr11_15473181_15473680	1.09	3.05e-07	3.64e-06	Distal Intergenic	11	15658508	15930107	271600	1	-184828	ENSBTAG00000019839	LTBP1	latent transforming growth factor beta binding protein 1
chr11	1731602	1732000	diffreps_chr11_1731601_1732000	2.72	4.44e-16	1.93e-14	Intron (NM_001105332/505421, intron 11 of 19)	11	1697163	1762646	65484	1	34439	ENSBTAG00000007675	NPHP1	nephrocystin 1
chr11	1807362	1808040	diffreps_chr11_1807361_1808040	1.49	3.06e-14	1.07e-12	Distal Intergenic	11	1774913	1807070	32158	1	32449	ENSBTAG00000024091	MALL	mal, T cell differentiation protein like
chr11	2019602	2021040	diffreps_chr11_2019601_2021040	1.4	0	0	Distal Intergenic	11	2042314	2136546	94233	1	-21274	ENSBTAG00000017955	KCNIP3	potassium voltage-gated channel interacting protein 3
chr11	2077722	2078080	diffreps_chr11_2077721_2078080	1.1	1.19e-06	1.27e-05	Intron (NM_001075612/513316, intron 2 of 8)	11	2042314	2136546	94233	1	35408	ENSBTAG00000017955	KCNIP3	potassium voltage-gated channel interacting protein 3
chr11	2082062	2083000	diffreps_chr11_2082061_2083000	1.1	8.88e-16	3.74e-14	Intron (NM_001075612/513316, intron 2 of 8)	11	2042314	2136546	94233	1	39748	ENSBTAG00000017955	KCNIP3	potassium voltage-gated channel interacting protein 3
chr11	2140062	2140820	diffreps_chr11_2140061_2140820	1.09	1.89e-15	7.68e-14	Distal Intergenic	11	2153786	2164529	10744	1	-12966	ENSBTAG00000011553	FAHD2A	fumarylacetoacetate hydrolase domain containing 2A
chr11	2277982	2278300	diffreps_chr11_2277981_2278300	1.02	0.000260282	0.00167403	Distal Intergenic	11	2282601	2284634	2034	2	6334	ENSBTAG00000020350	DUSP2	dual specificity phosphatase 2
chr11	2311682	2312420	diffreps_chr11_2311681_2312420	1.16	9.33e-15	3.47e-13	Distal Intergenic	11	2318507	2337408	18902	2	24988	ENSBTAG00000018372	STARD7	StAR related lipid transfer domain containing 7
chr11	2403842	2404300	diffreps_chr11_2403841_2404300	1.05	1.64e-07	2.05e-06	Distal Intergenic	11	2375182	2400447	25266	2	-3395	ENSBTAG00000000848	SNRNP200	small nuclear ribonucleoprotein U5 subunit 200
chr11	2422542	2422820	diffreps_chr11_2422541_2422820	1.88	3.12e-07	3.71e-06	Distal Intergenic	11	2433855	2467296	33442	1	-11035	ENSBTAG00000012925	NCAPH	non-SMC condensin I complex subunit H
chr11	24268522	24268920	diffreps_chr11_24268521_24268920	1.55	9.93e-09	1.55e-07	Distal Intergenic	11	24202347	24202422	76	2	-66100	NA	MIR12030	microRNA mir-12030
chr11	24291722	24292240	diffreps_chr11_24291721_24292240	3.12	0	0	Distal Intergenic	11	24202347	24202422	76	2	-89300	NA	MIR12030	microRNA mir-12030
chr11	24504082	24504600	diffreps_chr11_24504081_24504600	1.52	1.11e-10	2.35e-09	Distal Intergenic	11	24464835	24474936	10102	1	39247	ENSBTAG00000019382	PKDCC	protein kinase domain containing, cytoplasmic
chr11	25154742	25156380	diffreps_chr11_25154741_25156380	1.23	0	0	Distal Intergenic	11	25110230	25124544	14315	2	-30198	ENSBTAG00000004674	HAAO	3-hydroxyanthranilate 3,4-dioxygenase
chr11	25254442	25255540	diffreps_chr11_25254441_25255540	1.13	0	0	Distal Intergenic	11	25110230	25124544	14315	2	-129898	ENSBTAG00000004674	HAAO	3-hydroxyanthranilate 3,4-dioxygenase
chr11	2529942	2530580	diffreps_chr11_2529941_2530580	1.16	4.79e-12	1.25e-10	Distal Intergenic	11	2557667	2569332	11666	1	-27087	ENSBTAG00000014090	ARID5A	AT-rich interaction domain 5A
chr11	25316942	25317280	diffreps_chr11_25316941_25317280	1.14	3.76e-05	0.000296788	Distal Intergenic	11	25110230	25124544	14315	2	-192398	ENSBTAG00000004674	HAAO	3-hydroxyanthranilate 3,4-dioxygenase
chr11	25427222	25428960	diffreps_chr11_25427221_25428960	1.3	0	0	Distal Intergenic	11	25506532	25510785	4254	2	81825	ENSBTAG00000003553	ZFP36L2	ZFP36 ring finger protein like 2
chr11	25464222	25464580	diffreps_chr11_25464221_25464580	1.57	9.95e-08	1.29e-06	Distal Intergenic	11	25506532	25510785	4254	2	46205	ENSBTAG00000003553	ZFP36L2	ZFP36 ring finger protein like 2
chr11	25513682	25514220	diffreps_chr11_25513681_25514220	1.07	1.27e-09	2.28e-08	Distal Intergenic	11	25506532	25510785	4254	2	-2897	ENSBTAG00000003553	ZFP36L2	ZFP36 ring finger protein like 2
chr11	28918362	28919120	diffreps_chr11_28918361_28919120	1.95	0	0	Distal Intergenic	11	28928747	28933427	4681	1	-9627	ENSBTAG00000004105	TMEM247	transmembrane protein 247
chr11	29333562	29333920	diffreps_chr11_29333561_29333920	1.33	2.61e-06	2.62e-05	Distal Intergenic	11	29359099	29368734	9636	2	34814	ENSBTAG00000003358	MCFD2	multiple coagulation factor deficiency 2, ER cargo receptor complex subunit
chr11	29344142	29344560	diffreps_chr11_29344141_29344560	1.12	5.72e-07	6.46e-06	Distal Intergenic	11	29359099	29368734	9636	2	24174	ENSBTAG00000003358	MCFD2	multiple coagulation factor deficiency 2, ER cargo receptor complex subunit
chr11	29403202	29403600	diffreps_chr11_29403201_29403600	1.09	8.66e-07	9.47e-06	Promoter (1-2kb)	11	29405121	29525964	120844	1	-1521	ENSBTAG00000032558	TTC7A	tetratricopeptide repeat domain 7A
chr11	29445702	29446540	diffreps_chr11_29445701_29446540	1.17	0	0	Intron (NM_001205500/616640, intron 5 of 19)	11	29405121	29525964	120844	1	40581	ENSBTAG00000032558	TTC7A	tetratricopeptide repeat domain 7A
chr11	3102322	3102840	diffreps_chr11_3102321_3102840	1.44	9.51e-12	2.36e-10	Distal Intergenic	11	3047488	3087280	39793	1	54834	ENSBTAG00000005892	ZAP70	zeta chain of T cell receptor associated protein kinase 70
chr11	3103522	3103940	diffreps_chr11_3103521_3103940	1.13	2.75e-07	3.31e-06	Distal Intergenic	11	3047488	3087280	39793	1	56034	ENSBTAG00000005892	ZAP70	zeta chain of T cell receptor associated protein kinase 70
chr11	3105082	3105880	diffreps_chr11_3105081_3105880	1.27	0	0	Distal Intergenic	11	3047488	3087280	39793	1	57594	ENSBTAG00000005892	ZAP70	zeta chain of T cell receptor associated protein kinase 70
chr11	3629642	3629940	diffreps_chr11_3629641_3629940	1.01	0.000261725	0.0016819	Distal Intergenic	11	3584623	3622313	37691	1	45019	ENSBTAG00000054062	CNGA3	cyclic nucleotide gated channel subunit alpha 3
chr11	37377222	37377640	diffreps_chr11_37377221_37377640	1.14	5.37e-07	6.11e-06	Exon (NM_001192276/526027, exon 30 of 36)	11	37367356	37367428	73	2	-9794	ENSBTAG00000045474	MIR2297	microRNA mir-2297
chr11	4076902	4077240	diffreps_chr11_4076901_4077240	1.14	3.76e-05	0.000296788	Distal Intergenic	11	3840888	3960644	119757	2	-116258	ENSBTAG00000010388	MGAT4A	alpha-1,3-mannosyl-glycoprotein 4-beta-N-acetylglucosaminyltransferase A
chr11	43461822	43462120	diffreps_chr11_43461821_43462120	1.07	0.000175666	0.00118122	Distal Intergenic	11	43514061	43544032	29972	1	-51941	ENSBTAG00000007414	PAPOLG	poly(A) polymerase gamma
chr11	44191422	44191780	diffreps_chr11_44191421_44191780	1.86	1.9e-09	3.31e-08	Distal Intergenic	11	44267491	44323708	56218	1	-75711	ENSBTAG00000022461	SEPTIN10	septin 10
chr11	44351182	44351880	diffreps_chr11_44351181_44351880	1.69	0	0	Distal Intergenic	11	44267491	44323708	56218	1	83691	ENSBTAG00000022461	SEPTIN10	septin 10
chr11	44931102	44931520	diffreps_chr11_44931101_44931520	1.04	1.07e-05	9.56e-05	Distal Intergenic	11	44906839	44921512	14674	2	-9590	ENSBTAG00000002803	SULT1C3	sulfotransferase family, cytosolic, 1C, member 3
chr11	46174802	46175360	diffreps_chr11_46174801_46175360	1.49	3.06e-14	1.07e-12	Distal Intergenic	11	46209289	46242645	33357	1	-33929	ENSBTAG00000014159	TTL	tubulin tyrosine ligase
chr11	46180342	46180840	diffreps_chr11_46180341_46180840	1.31	3.72e-09	6.22e-08	Distal Intergenic	11	46209289	46242645	33357	1	-28449	ENSBTAG00000014159	TTL	tubulin tyrosine ligase
chr11	46373942	46374500	diffreps_chr11_46373941_46374500	1.82	3e-15	1.19e-13	Distal Intergenic	11	46352538	46365946	13409	1	21404	ENSBTAG00000007895	SLC20A1	solute carrier family 20 member 1
chr11	46439522	46439920	diffreps_chr11_46439521_46439920	1.26	1.55e-06	1.61e-05	Distal Intergenic	11	46451749	46473972	22224	2	34052	ENSBTAG00000002298	CKAP2L	cytoskeleton associated protein 2 like
chr11	49055902	49056560	diffreps_chr11_49055901_49056560	1.72	0	0	Distal Intergenic	11	49083730	49126019	42290	2	69459	ENSBTAG00000024000	ATOH8	atonal bHLH transcription factor 8
chr11	49129022	49129940	diffreps_chr11_49129021_49129940	1.2	0	0	Distal Intergenic	11	49083730	49126019	42290	2	-3003	ENSBTAG00000024000	ATOH8	atonal bHLH transcription factor 8
chr11	49130382	49130880	diffreps_chr11_49130381_49130880	2.89	0	0	Distal Intergenic	11	49083730	49126019	42290	2	-4363	ENSBTAG00000024000	ATOH8	atonal bHLH transcription factor 8
chr11	49458202	49458460	diffreps_chr11_49458201_49458460	3.29	2.49e-12	6.77e-11	Exon (NM_174066/281190, exon 9 of 15)	11	49449772	49461523	11752	1	8430	ENSBTAG00000038477	GGCX	gamma-glutamyl carboxylase
chr11	49459102	49459720	diffreps_chr11_49459101_49459720	1.09	5.68e-14	1.93e-12	Exon (NM_174066/281190, exon 11 of 15)	11	49449772	49461523	11752	1	9330	ENSBTAG00000038477	GGCX	gamma-glutamyl carboxylase
chr11	49560622	49560920	diffreps_chr11_49560621_49560920	1.14	0.000110905	0.0007836	Distal Intergenic	11	49590872	49605835	14964	1	-29952	ENSBTAG00000005432	CAPG	capping actin protein, gelsolin like
chr11	49574162	49574480	diffreps_chr11_49574161_49574480	3.48	2.22e-16	9.84e-15	Distal Intergenic	11	49590872	49605835	14964	1	-16392	ENSBTAG00000005432	CAPG	capping actin protein, gelsolin like
chr11	49599322	49599740	diffreps_chr11_49599321_49599740	1.45	2.51e-08	3.64e-07	Intron (NM_178574/353121, intron 5 of 9)	11	49590872	49605835	14964	1	8450	ENSBTAG00000005432	CAPG	capping actin protein, gelsolin like
chr11	50124622	50125260	diffreps_chr11_50124621_50125260	1.6	2.22e-16	9.84e-15	Distal Intergenic	11	50094264	50095274	1011	2	-29348	ENSBTAG00000005654	TMSB10	thymosin beta 10
chr11	60960942	60961400	diffreps_chr11_60960941_60961400	1.43	2.95e-10	5.84e-09	Distal Intergenic	11	61003739	61011375	7637	2	49975	ENSBTAG00000000899	TMEM17	transmembrane protein 17
chr11	6156062	6156420	diffreps_chr11_6156061_6156420	1.04	1.52e-05	0.000131254	Distal Intergenic	11	5978170	6119338	141169	2	-36724	ENSBTAG00000025898	TBC1D8	TBC1 domain family member 8
chr11	63284382	63284620	diffreps_chr11_63284381_63284620	3.42	4.92e-12	1.28e-10	Distal Intergenic	11	63379682	63409621	29940	1	-95062	ENSBTAG00000007763	SLC1A4	solute carrier family 1 member 4
chr11	63419842	63420220	diffreps_chr11_63419841_63420220	1.02	3.13e-05	0.000250971	Distal Intergenic	11	63379682	63409621	29940	1	40160	ENSBTAG00000007763	SLC1A4	solute carrier family 1 member 4
chr11	649022	649340	diffreps_chr11_649021_649340	3.02	1.54e-14	5.59e-13	Distal Intergenic	11	380816	516486	135671	2	-132536	ENSBTAG00000005828	MERTK	MER proto-oncogene, tyrosine kinase
chr11	6716822	6717800	diffreps_chr11_6716821_6717800	2.06	0	0	Intron (NR_162326/114483291, intron 2 of 3)	11	6690101	6728432	38332	1	26721	ENSBTAG00000006343	IL1R2	interleukin 1 receptor type 2
chr11	68746962	68747300	diffreps_chr11_68746961_68747300	1.17	3.58e-05	0.000283341	Distal Intergenic	11	68772689	68987976	215288	1	-25389	ENSBTAG00000021735	GALNT14	polypeptide N-acetylgalactosaminyltransferase 14
chr11	69162062	69162700	diffreps_chr11_69162061_69162700	1.28	9.47e-12	2.35e-10	Distal Intergenic	11	69068510	69144510	76001	1	93552	ENSBTAG00000008946	CAPN13	calpain 13
chr11	69675182	69675720	diffreps_chr11_69675181_69675720	1.08	6.82e-09	1.1e-07	Distal Intergenic	11	69617500	69643907	26408	2	-31275	ENSBTAG00000026111	LBH	LBH regulator of WNT signaling pathway
chr11	70860602	70860960	diffreps_chr11_70860601_70860960	1.25	1.61e-06	1.68e-05	Distal Intergenic	11	70866369	70905461	39093	2	44501	ENSBTAG00000018196	WDR43	WD repeat domain 43
chr11	71300162	71300900	diffreps_chr11_71300161_71300900	1.47	0	0	Distal Intergenic	11	71340649	71360069	19421	2	59169	ENSBTAG00000023929	FOSL2	FOS like 2, AP-1 transcription factor subunit
chr11	72157722	72158200	diffreps_chr11_72157721_72158200	1.91	1.55e-13	4.95e-12	Distal Intergenic	11	72190119	72192915	2797	1	-31919	ENSBTAG00000018164	FNDC4	fibronectin type III domain containing 4
chr11	7224922	7225200	diffreps_chr11_7224921_7225200	1.09	0.000119721	0.00084031	Distal Intergenic	11	7134585	7153551	18967	1	90337	ENSBTAG00000018571	IL1RL1	interleukin 1 receptor like 1
chr11	72360822	72361260	diffreps_chr11_72360821_72361260	1.35	6.38e-09	1.03e-07	Exon (NM_001076429/616608, exon 6 of 8)	11	72337036	72358212	21177	2	-2610	ENSBTAG00000018267	TRIM54	tripartite motif containing 54
chr11	7241462	7241900	diffreps_chr11_7241461_7241900	2.79	0	0	Distal Intergenic	11	7134585	7153551	18967	1	106877	ENSBTAG00000018571	IL1RL1	interleukin 1 receptor like 1
chr11	72425142	72425440	diffreps_chr11_72425141_72425440	3.83	2.38e-14	8.44e-13	Exon (NM_001046219/516021, exon 8 of 18)	11	72420089	72430694	10606	1	5053	ENSBTAG00000006832	SLC5A6	solute carrier family 5 member 6
chr11	72457902	72458140	diffreps_chr11_72457901_72458140	1.2	0.000432598	0.00263091	Distal Intergenic	11	72481572	72485731	4160	2	27591	ENSBTAG00000054302	TCF23	transcription factor 23
chr11	72551222	72551560	diffreps_chr11_72551221_72551560	1.46	1.1e-06	1.18e-05	Promoter (1-2kb)	11	72537265	72549970	12706	2	-1252	ENSBTAG00000011325	KHK	ketohexokinase
chr11	72961262	72961640	diffreps_chr11_72961261_72961640	2.3	1.31e-12	3.7e-11	Intron (NM_001076455/617324, intron 3 of 6)	11	72931638	72983048	51411	1	29624	ENSBTAG00000005041	CIB4	calcium and integrin binding family member 4
chr11	73958942	73959560	diffreps_chr11_73958941_73959560	1.15	1.04e-11	2.57e-10	Distal Intergenic	11	73971560	74074893	103334	1	-12000	ENSBTAG00000021143	DNMT3A	DNA methyltransferase 3 alpha
chr11	74149762	74149980	diffreps_chr11_74149761_74149980	3.55	1.94e-11	4.6e-10	Distal Intergenic	11	74117511	74124989	7479	1	32251	ENSBTAG00000007897	POMC	proopiomelanocortin
chr11	75315322	75315900	diffreps_chr11_75315321_75315900	1.08	6.14e-10	1.16e-08	Intron (NM_001164494/537141, intron 3 of 13)	11	75356019	75356075	57	2	40175	NA	MIR12049	microRNA mir-12049
chr11	75608802	75609160	diffreps_chr11_75608801_75609160	1.14	1.87e-05	0.000157386	Distal Intergenic	11	75240502	75572709	332208	2	-36093	ENSBTAG00000021969	KLHL29	kelch like family member 29
chr11	78215462	78216000	diffreps_chr11_78215461_78216000	1.14	3.97e-09	6.63e-08	Distal Intergenic	11	78220809	78257448	36640	1	-4809	ENSBTAG00000015490	HS1BP3	HCLS1 binding protein 3
chr11	78282162	78282540	diffreps_chr11_78282161_78282540	3.88	0	0	Distal Intergenic	11	78220809	78257448	36640	1	61353	ENSBTAG00000015490	HS1BP3	HCLS1 binding protein 3
chr11	78282782	78283260	diffreps_chr11_78282781_78283260	1.15	1.08e-08	1.67e-07	Distal Intergenic	11	78220809	78257448	36640	1	61973	ENSBTAG00000015490	HS1BP3	HCLS1 binding protein 3
chr11	78458402	78458680	diffreps_chr11_78458401_78458680	3.68	6.55e-15	2.49e-13	Distal Intergenic	11	78398389	78400601	2213	2	-57801	NA	RHOB	ras homolog family member B
chr11	78931162	78931560	diffreps_chr11_78931161_78931560	1.23	2.84e-07	3.41e-06	Distal Intergenic	11	78904244	78910954	6711	1	26918	ENSBTAG00000015587	TTC32	tetratricopeptide repeat domain 32
chr11	80949722	80949920	diffreps_chr11_80949721_80949920	3.22	3.75e-10	7.27e-09	Intron (NM_174490/282124, intron 2 of 3)	11	80822892	80851511	28620	2	-98211	ENSBTAG00000020059	GEN1	GEN1 Holliday junction 5' flap endonuclease
chr11	82860162	82860620	diffreps_chr11_82860161_82860620	1.02	2.21e-05	0.000183478	Promoter (<=1kb)	11	82860475	82861962	1488	1	0	ENSBTAG00000022142	SCGB1C1	secretoglobin family 1C member 1
chr11	82967482	82967700	diffreps_chr11_82967481_82967700	2.55	1.31e-08	2e-07	Promoter (1-2kb)	11	82964859	82966228	1370	2	-1254	ENSBTAG00000020575	IFITM5	interferon induced transmembrane protein 5
chr11	86195522	86196020	diffreps_chr11_86195521_86196020	1.04	2.36e-07	2.88e-06	Distal Intergenic	11	86081383	86162423	81041	2	-33099	ENSBTAG00000007689	LPIN1	lipin 1
chr11	86316862	86317220	diffreps_chr11_86316861_86317220	1.63	3.28e-08	4.65e-07	Distal Intergenic	11	86233073	86301851	68779	2	-15011	ENSBTAG00000015402	GREB1	growth regulating estrogen receptor binding 1
chr11	86370762	86371140	diffreps_chr11_86370761_86371140	1.31	9.17e-07	9.99e-06	Distal Intergenic	11	86379649	86401983	22335	1	-8509	ENSBTAG00000048286	E2F6	E2F transcription factor 6
chr11	86655542	86655880	diffreps_chr11_86655541_86655880	1.31	6.25e-07	7e-06	Distal Intergenic	11	86644116	86651182	7067	2	-4360	ENSBTAG00000001903	C11H2orf50	chromosome 11 C2orf50 homolog
chr11	86843062	86843840	diffreps_chr11_86843061_86843840	1.44	1.1e-14	4.06e-13	Distal Intergenic	11	86859610	86882949	23340	1	-15770	ENSBTAG00000001928	PDIA6	protein disulfide isomerase family A member 6
chr11	87207882	87208560	diffreps_chr11_87207881_87208560	1.21	4.44e-16	1.93e-14	Distal Intergenic	11	87200208	87204613	4406	1	7674	ENSBTAG00000004256	ODC1	ornithine decarboxylase 1
chr11	87509622	87509940	diffreps_chr11_87509621_87509940	4.46	0	0	Distal Intergenic	11	87488673	87495961	7289	2	-13661	ENSBTAG00000008216	RRM2	ribonucleotide reductase regulatory subunit M2
chr11	87531002	87531380	diffreps_chr11_87531001_87531380	1.14	3.11e-06	3.08e-05	Distal Intergenic	11	87547143	87557856	10714	2	26476	ENSBTAG00000046218	KLF11	Kruppel like factor 11
chr11	87592782	87593200	diffreps_chr11_87592781_87593200	1.52	1.21e-08	1.86e-07	Intron (NM_001076450/617248, intron 14 of 15)	11	87547143	87557856	10714	2	-34926	ENSBTAG00000046218	KLF11	Kruppel like factor 11
chr11	87741022	87742140	diffreps_chr11_87741021_87742140	1.05	0	0	Distal Intergenic	11	87654906	87710164	55259	2	-30858	ENSBTAG00000007543	TAF1B	TATA-box binding protein associated factor, RNA polymerase I subunit B
chr11	87756682	87757120	diffreps_chr11_87756681_87757120	4.12	0	0	Distal Intergenic	11	87654906	87710164	55259	2	-46518	ENSBTAG00000007543	TAF1B	TATA-box binding protein associated factor, RNA polymerase I subunit B
chr11	88034842	88035320	diffreps_chr11_88034841_88035320	1.4	3.38e-09	5.69e-08	Distal Intergenic	11	88013881	88028766	14886	1	20961	ENSBTAG00000013063	ITGB1BP1	integrin subunit beta 1 binding protein 1
chr11	88233622	88233920	diffreps_chr11_88233621_88233920	1.02	9.01e-05	0.000650821	Distal Intergenic	11	88346339	88346407	69	1	-112419	ENSBTAG00000049486	MIR2298	microRNA mir-2298
chr11	92585862	92586260	diffreps_chr11_92585861_92586260	1.05	3.75e-06	3.64e-05	Intron (NM_001144082/541268, intron 4 of 19)	11	92549308	92685530	136223	1	36554	ENSBTAG00000008232	DAB2IP	DAB2 interacting protein
chr11	92990902	92991280	diffreps_chr11_92990901_92991280	2.88	6.66e-16	2.85e-14	Distal Intergenic	11	93028895	93046812	17918	2	55532	ENSBTAG00000004295	NDUFA8	NADH:ubiquinone oxidoreductase subunit A8
chr11	93009982	93012320	diffreps_chr11_93009981_93012320	1.55	0	0	Distal Intergenic	11	93028895	93046812	17918	2	34492	ENSBTAG00000004295	NDUFA8	NADH:ubiquinone oxidoreductase subunit A8
chr11	93223542	93224440	diffreps_chr11_93223541_93224440	1.65	0	0	Distal Intergenic	11	93236344	93262104	25761	1	-11904	ENSBTAG00000006716	PTGS1	prostaglandin-endoperoxide synthase 1
chr11	94496742	94497420	diffreps_chr11_94496741_94497420	1.82	0	0	Distal Intergenic	11	94282529	94420533	138005	2	-76209	ENSBTAG00000021921	STRBP	spermatid perinuclear RNA binding protein
chr11	95151502	95151920	diffreps_chr11_95151501_95151920	1.11	2.34e-06	2.36e-05	Distal Intergenic	11	95125097	95144837	19741	1	26405	ENSBTAG00000010990	LHX2	LIM homeobox 2
chr11	95462682	95463620	diffreps_chr11_95462681_95463620	1.05	3.11e-15	1.23e-13	Distal Intergenic	11	95402192	95459424	57233	2	-3258	ENSBTAG00000003067	PSMB7	proteasome 20S subunit beta 7
chr11	96225022	96225220	diffreps_chr11_96225021_96225220	3.45	1.76e-10	3.61e-09	Distal Intergenic	11	96142919	96214314	71396	1	82103	ENSBTAG00000011544	GAPVD1	GTPase activating protein and VPS9 domains 1
chr11	96260802	96261200	diffreps_chr11_96260801_96261200	1.48	3.13e-08	4.46e-07	Distal Intergenic	11	96142919	96214314	71396	1	117883	ENSBTAG00000011544	GAPVD1	GTPase activating protein and VPS9 domains 1
chr11	97002242	97002540	diffreps_chr11_97002241_97002540	1.06	0.000124472	0.000869265	Distal Intergenic	11	96551862	96776532	224671	1	450380	ENSBTAG00000013314	PBX3	PBX homeobox 3
chr11	97296242	97296980	diffreps_chr11_97296241_97296980	1.62	0	0	Distal Intergenic	11	97584412	97610512	26101	1	-287432	ENSBTAG00000003438	ZBTB43	zinc finger and BTB domain containing 43
chr11	97560502	97560780	diffreps_chr11_97560501_97560780	1.06	0.000124472	0.000869265	Distal Intergenic	11	97584412	97610512	26101	1	-23632	ENSBTAG00000003438	ZBTB43	zinc finger and BTB domain containing 43
chr11	97696702	97697080	diffreps_chr11_97696701_97697080	1.24	1.15e-06	1.23e-05	Intron (NM_001193100/616166, intron 2 of 19)	11	97677004	97974308	297305	1	19698	ENSBTAG00000023843	RALGPS1	Ral GEF with PH domain and SH3 binding motif 1
chr11	97702882	97703340	diffreps_chr11_97702881_97703340	1.12	1.4e-07	1.78e-06	Intron (NM_001193100/616166, intron 2 of 19)	11	97677004	97974308	297305	1	25878	ENSBTAG00000023843	RALGPS1	Ral GEF with PH domain and SH3 binding motif 1
chr11	97953042	97953580	diffreps_chr11_97953041_97953580	1.43	3.6e-13	1.11e-11	Exon (NM_001193100/616166, exon 15 of 20)	11	98027457	98137332	109876	1	-73877	ENSBTAG00000006948	GARNL3	GTPase activating Rap/RanGAP domain like 3
chr11	98160962	98161320	diffreps_chr11_98160961_98161320	1.15	1.29e-05	0.000112287	Distal Intergenic	11	98149418	98158448	9031	1	11544	ENSBTAG00000006957	SLC2A8	solute carrier family 2 member 8
chr11	98218622	98219020	diffreps_chr11_98218621_98219020	1.69	1.37e-09	2.46e-08	Distal Intergenic	11	98183930	98217754	33825	1	34692	ENSBTAG00000012844	LRSAM1	leucine rich repeat and sterile alpha motif containing 1
chr11	98362282	98362540	diffreps_chr11_98362281_98362540	1.75	1.89e-06	1.94e-05	Intron (NM_174619/282378, intron 12 of 18)	11	98396191	98411785	15595	1	-33651	ENSBTAG00000013509	TTC16	tetratricopeptide repeat domain 16
chr11	98540582	98541140	diffreps_chr11_98540581_98541140	3.15	0	0	Exon (NM_001013582/280715, exon 6 of 7)	11	98540017	98549627	9611	2	8487	ENSBTAG00000006305	AK1	adenylate kinase 1
chr11	98541982	98543160	diffreps_chr11_98541981_98543160	1.46	0	0	Intron (NM_001013582/280715, intron 5 of 6)	11	98540017	98549627	9611	2	6467	ENSBTAG00000006305	AK1	adenylate kinase 1
chr11	98609042	98612060	diffreps_chr11_98609041_98612060	1.16	0	0	3' UTR	11	98600691	98603745	3055	2	-5297	ENSBTAG00000003388	DPM2	dolichyl-phosphate mannosyltransferase subunit 2, regulatory
chr11	98755722	98756360	diffreps_chr11_98755721_98756360	1.21	6.55e-15	2.49e-13	Downstream (2-3kb)	11	98758686	98764051	5366	2	7691	ENSBTAG00000016218	PTGES2	prostaglandin E synthase 2
chr11	98863382	98863840	diffreps_chr11_98863381_98863840	1.18	2.38e-07	2.9e-06	Intron (NM_001076820/508794, intron 21 of 21)	11	98855939	98856023	85	2	-7359	ENSBTAG00000050220	MIR3154	microRNA mir-3154
chr11	98865762	98866220	diffreps_chr11_98865761_98866220	1.05	8.2e-08	1.09e-06	3' UTR	11	98855939	98856023	85	2	-9739	ENSBTAG00000050220	MIR3154	microRNA mir-3154
chr11	98960982	98961680	diffreps_chr11_98960981_98961680	1.33	2.22e-16	9.84e-15	Distal Intergenic	11	98967374	98984644	17271	1	-5694	ENSBTAG00000025612	URM1	ubiquitin related modifier 1
chr11	98998702	98999060	diffreps_chr11_98998701_98999060	1.19	1.15e-05	0.000101647	Distal Intergenic	11	99005557	99017658	12102	1	-6497	ENSBTAG00000038139	CERCAM	cerebral endothelial cell adhesion molecule
chr11	99004442	99004940	diffreps_chr11_99004441_99004940	1.06	1.62e-07	2.03e-06	Promoter (<=1kb)	11	99005557	99017658	12102	1	-617	ENSBTAG00000038139	CERCAM	cerebral endothelial cell adhesion molecule
chr11	99050182	99050860	diffreps_chr11_99050181_99050860	1.44	4.44e-16	1.93e-14	Intron (NM_001038180/539043, intron 9 of 16)	11	99035483	99058375	22893	1	14699	ENSBTAG00000030567	ODF2	outer dense fiber of sperm tails 2
chr11	99336402	99336760	diffreps_chr11_99336401_99336760	1.52	1.79e-07	2.22e-06	Intron (NM_001077978/528582, intron 5 of 14)	11	99312775	99379692	66918	2	42932	ENSBTAG00000036101	KYAT1	kynurenine aminotransferase 1
chr11	99432862	99433060	diffreps_chr11_99432861_99433060	2.34	1.31e-07	1.67e-06	Intron (NM_001076243/540828, intron 2 of 10)	11	99424408	99441357	16950	1	8454	ENSBTAG00000038831	PHYHD1	phytanoyl-CoA dioxygenase domain containing 1
chr11	99591262	99591660	diffreps_chr11_99591261_99591660	1.1	1.19e-06	1.27e-05	Exon (NM_001046173/514460, exon 5 of 10)	11	99603941	99604029	89	1	-12281	NA	MIR12056	microRNA mir-12056
chr12	15507362	15507640	diffreps_chr12_15507361_15507640	1.03	0.0002585	0.00166439	Distal Intergenic	12	15472248	15475791	3544	2	-31571	ENSBTAG00000010156	TPT1	tumor protein, translationally-controlled 1
chr12	16838642	16838980	diffreps_chr12_16838641_16838980	1.07	8.63e-05	0.000626201	Intron (NM_001001157/407230, intron 2 of 3)	12	16776271	16842135	65865	2	3155	ENSBTAG00000013498	HTR2A	5-hydroxytryptamine receptor 2A
chr12	18910922	18911780	diffreps_chr12_18910921_18911780	1.35	0	0	Distal Intergenic	12	18867223	18895609	28387	1	43699	ENSBTAG00000002271	CDADC1	cytidine and dCMP deaminase domain containing 1
chr12	19195642	19196160	diffreps_chr12_19195641_19196160	1.06	1.01e-08	1.57e-07	Distal Intergenic	12	19179821	19181672	1852	1	15821	ENSBTAG00000016998	ARL11	ADP ribosylation factor like GTPase 11
chr12	20426302	20426740	diffreps_chr12_20426301_20426740	1.01	2.75e-06	2.74e-05	Distal Intergenic	12	20346942	20409875	62934	1	79360	ENSBTAG00000020149	RNASEH2B	ribonuclease H2 subunit B
chr12	20713402	20713680	diffreps_chr12_20713401_20713680	1.07	0.000736808	0.00420228	Distal Intergenic	12	20784861	20816359	31499	1	-71181	ENSBTAG00000005284	SERPINE3	serpin family E member 3
chr12	21337642	21338060	diffreps_chr12_21337641_21338060	1.09	2.13e-07	2.62e-06	Distal Intergenic	12	21303460	21309643	6184	1	34182	ENSBTAG00000019863	CCDC70	coiled-coil domain containing 70
chr12	21883962	21884320	diffreps_chr12_21883961_21884320	1.16	2.52e-05	0.000206639	Distal Intergenic	12	21839930	21865293	25364	1	44032	ENSBTAG00000015522	MRPS31	mitochondrial ribosomal protein S31
chr12	24696682	24696880	diffreps_chr12_24696681_24696880	1.24	0.000845232	0.00472424	Promoter (<=1kb)	12	24696527	24722643	26117	1	155	ENSBTAG00000011850	ALG5	ALG5 dolichyl-phosphate beta-glucosyltransferase
chr12	29909702	29910180	diffreps_chr12_29909701_29910180	1.03	3.39e-07	4e-06	Distal Intergenic	12	29967352	29990695	23344	2	80515	ENSBTAG00000033386	TEX26	testis expressed 26
chr12	30079462	30079660	diffreps_chr12_30079461_30079660	4.18	5.54e-12	1.43e-10	Distal Intergenic	12	30111715	30134530	22816	2	54870	ENSBTAG00000013201	ALOX5AP	arachidonate 5-lipoxygenase activating protein
chr12	30080042	30080680	diffreps_chr12_30080041_30080680	1.53	2.22e-16	9.84e-15	Distal Intergenic	12	30111715	30134530	22816	2	53850	ENSBTAG00000013201	ALOX5AP	arachidonate 5-lipoxygenase activating protein
chr12	31018322	31018560	diffreps_chr12_31018321_31018560	2.2	5.35e-08	7.31e-07	Distal Intergenic	12	30977358	30991889	14532	1	40964	ENSBTAG00000018577	SLC7A1	solute carrier family 7 member 1
chr12	32539542	32539740	diffreps_chr12_32539541_32539740	2.77	1.01e-08	1.57e-07	Distal Intergenic	12	32485688	32495663	9976	2	-43879	ENSBTAG00000012600	GTF3A	general transcription factor IIIA
chr12	32553082	32554440	diffreps_chr12_32553081_32554440	1.38	0	0	Distal Intergenic	12	32485688	32495663	9976	2	-57419	ENSBTAG00000012600	GTF3A	general transcription factor IIIA
chr12	34320702	34321340	diffreps_chr12_34320701_34321340	1.19	3.94e-10	7.62e-09	Distal Intergenic	12	34293691	34301596	7906	1	27011	ENSBTAG00000053310	C1QTNF9	C1q and TNF related 9
chr12	36229902	36230300	diffreps_chr12_36229901_36230300	1.39	1.06e-08	1.65e-07	Distal Intergenic	12	36235527	36261519	25993	1	-5227	ENSBTAG00000007167	ZMYM5	zinc finger MYM-type containing 5
chr12	52911162	52911540	diffreps_chr12_52911161_52911540	2.09	1.36e-11	3.3e-10	Distal Intergenic	12	52903108	52903175	68	1	8054	ENSBTAG00000044565	MIR2284S	microRNA mir-2284s
chr12	54665902	54666200	diffreps_chr12_54665901_54666200	1.29	3.9e-05	0.000306862	Distal Intergenic	12	54578637	54649182	70546	1	87265	ENSBTAG00000014227	NDFIP2	Nedd4 family interacting protein 2
chr12	69049282	69049560	diffreps_chr12_69049281_69049560	1.34	2.38e-05	0.000196018	Distal Intergenic	12	68966206	69006171	39966	2	-43111	ENSBTAG00000002300	DCT	dopachrome tautomerase
chr12	74457062	74457300	diffreps_chr12_74457061_74457300	1.58	1.7e-05	0.000144841	Intron (NM_001099710/527679, intron 1 of 7)	12	74410787	74571446	160660	1	46275	ENSBTAG00000018313	MBNL2	muscleblind like splicing regulator 2
chr12	75454542	75455220	diffreps_chr12_75454541_75455220	1.02	7.77e-13	2.27e-11	Exon (NM_001192712/531927, exon 24 of 26)	12	75461369	75554654	93286	2	99434	ENSBTAG00000032234	STK24	serine/threonine kinase 24
chr12	75626082	75626660	diffreps_chr12_75626081_75626660	1.56	8.38e-12	2.1e-10	Distal Intergenic	12	75634635	75681318	46684	2	54658	ENSBTAG00000004440	SLC15A1	solute carrier family 15 member 1
chr12	75766482	75768100	diffreps_chr12_75766481_75768100	1.37	0	0	Intron (NM_001193099/616045, intron 38 of 52)	12	75634635	75681318	46684	2	-85164	ENSBTAG00000004440	SLC15A1	solute carrier family 15 member 1
chr12	76058042	76058400	diffreps_chr12_76058041_76058400	1.73	9e-09	1.42e-07	Distal Intergenic	12	76079783	76250100	170318	1	-21383	ENSBTAG00000005682	UBAC2	UBA domain containing 2
chr12	77225562	77225960	diffreps_chr12_77225561_77225960	1.17	5.93e-06	5.53e-05	Distal Intergenic	12	77176136	77215685	39550	2	-9877	ENSBTAG00000046552	GGACT	gamma-glutamylamine cyclotransferase
chr12	85214942	85215160	diffreps_chr12_85214941_85215160	1.45	0.000120852	0.00084747	Distal Intergenic	12	85170093	85200359	30267	2	-14583	ENSBTAG00000049416	RAB20	RAB20, member RAS oncogene family
chr12	85309562	85310180	diffreps_chr12_85309561_85310180	1.09	2.42e-12	6.6e-11	Distal Intergenic	12	85327078	85354740	27663	2	44560	ENSBTAG00000004041	ANKRD10	ankyrin repeat domain 10
chr12	85416802	85417380	diffreps_chr12_85416801_85417380	2.78	0	0	Distal Intergenic	12	85435193	85529458	94266	1	-17813	ENSBTAG00000020726	ARHGEF7	Rho guanine nucleotide exchange factor 7
chr12	85487482	85487920	diffreps_chr12_85487481_85487920	1.37	5.65e-09	9.23e-08	Intron (NM_001293096/524352, intron 4 of 17)	12	85435193	85529458	94266	1	52289	ENSBTAG00000020726	ARHGEF7	Rho guanine nucleotide exchange factor 7
chr12	86453522	86454120	diffreps_chr12_86453521_86454120	1.03	6.34e-11	1.4e-09	Distal Intergenic	12	86491673	86497955	6283	1	-37553	ENSBTAG00000007411	F7	coagulation factor VII
chr12	86454162	86454900	diffreps_chr12_86454161_86454900	2.9	0	0	Distal Intergenic	12	86491673	86497955	6283	1	-36773	ENSBTAG00000007411	F7	coagulation factor VII
chr12	86761162	86762280	diffreps_chr12_86761161_86762280	1.63	0	0	Intron (NM_174173/281457, intron 4 of 6)	12	86752867	86766529	13663	1	8295	ENSBTAG00000019963	GRK1	G protein-coupled receptor kinase 1
chr12	86802062	86802680	diffreps_chr12_86802061_86802680	1.95	0	0	Distal Intergenic	12	86752867	86766529	13663	1	49195	ENSBTAG00000019963	GRK1	G protein-coupled receptor kinase 1
chr12	86803102	86803560	diffreps_chr12_86803101_86803560	2.02	2.33e-13	7.33e-12	Distal Intergenic	12	86752867	86766529	13663	1	50235	ENSBTAG00000019963	GRK1	G protein-coupled receptor kinase 1
chr13	12511902	12512460	diffreps_chr13_12511901_12512460	1.56	3.92e-12	1.04e-10	Distal Intergenic	13	12518930	12533297	14368	2	20837	ENSBTAG00000012377	ECHDC3	enoyl-CoA hydratase domain containing 3
chr13	17175862	17176480	diffreps_chr13_17175861_17176480	1.28	2.69e-13	8.4e-12	Distal Intergenic	13	17295082	17320935	25854	2	144455	ENSBTAG00000008401	PFKFB3	6-phosphofructo-2-kinase/fructose-2,6-biphosphatase 3
chr13	17495302	17495920	diffreps_chr13_17495301_17495920	1.3	3.4e-13	1.05e-11	Exon (NM_174358/281861, exon 7 of 9)	13	17455360	17500712	45353	1	39942	ENSBTAG00000020892	IL2RA	interleukin 2 receptor subunit alpha
chr13	22709042	22709340	diffreps_chr13_22709041_22709340	1.03	0.000369613	0.00228747	Distal Intergenic	13	22617865	22617934	70	2	-91108	ENSBTAG00000046646	MIR2285D	microRNA mir-2285d
chr13	25455582	25455780	diffreps_chr13_25455581_25455780	1.77	1.47e-05	0.000126712	Distal Intergenic	13	25808009	25844085	36077	2	388305	ENSBTAG00000015569	ENKUR	enkurin, TRPC channel interacting protein
chr13	26785842	26786200	diffreps_chr13_26785841_26786200	1.23	7.37e-06	6.78e-05	Distal Intergenic	13	26666170	26728037	61868	1	119672	ENSBTAG00000008056	GAD2	glutamate decarboxylase 2
chr13	28491582	28491780	diffreps_chr13_28491581_28491780	3.18	7.66e-10	1.41e-08	Intron (NM_001192267/510714, intron 5 of 22)	13	28519115	28519188	74	2	27408	NA	MIR2304	microRNA mir-2304
chr13	29235822	29236080	diffreps_chr13_29235821_29236080	2.3	1.86e-09	3.26e-08	Intron (NM_001046393/535023, intron 1 of 3)	13	29216133	29292558	76426	2	56478	ENSBTAG00000010023	FAM107B	family with sequence similarity 107 member B
chr13	328302	328660	diffreps_chr13_328301_328660	1.17	1.73e-05	0.000146982	Distal Intergenic	13	680566	739284	58719	2	410624	ENSBTAG00000035323	TMX4	thioredoxin related transmembrane protein 4
chr13	33263562	33263960	diffreps_chr13_33263561_33263960	1.22	4.14e-07	4.81e-06	Distal Intergenic	13	33326460	33372635	46176	1	-62500	ENSBTAG00000002280	KIF5B	kinesin family member 5B
chr13	34973782	34974540	diffreps_chr13_34973781_34974540	1.11	1.11e-15	4.64e-14	Distal Intergenic	13	35028260	35064475	36216	2	89935	ENSBTAG00000001204	JCAD	junctional cadherin 5 associated
chr13	35646802	35647120	diffreps_chr13_35646801_35647120	1.08	4.2e-05	0.000327456	Distal Intergenic	13	35474945	35490959	16015	2	-155843	ENSBTAG00000010330	LYZL1	lysozyme-like 1
chr13	35726182	35726580	diffreps_chr13_35726181_35726580	1.45	5.42e-08	7.41e-07	Distal Intergenic	13	35474945	35490959	16015	2	-235223	ENSBTAG00000010330	LYZL1	lysozyme-like 1
chr13	37766762	37767300	diffreps_chr13_37766761_37767300	1.47	7.49e-12	1.89e-10	Intron (NM_001102032/515755, intron 7 of 16)	13	37756663	37789222	32560	2	21922	ENSBTAG00000006043	LOC515755	solute carrier family 6 (neurotransmitter transporter, glycine), member 9-like
chr13	38190902	38191100	diffreps_chr13_38190901_38191100	1.96	3.31e-06	3.25e-05	Distal Intergenic	13	38239543	38239614	72	2	48514	NA	MIR12034	microRNA mir-12034
chr13	39298802	39299220	diffreps_chr13_39298801_39299220	1.25	8.82e-08	1.16e-06	Distal Intergenic	13	39466561	39573514	106954	1	-167341	ENSBTAG00000020382	RIN2	Ras and Rab interactor 2
chr13	39318522	39319460	diffreps_chr13_39318521_39319460	1.05	7.81e-12	1.97e-10	Distal Intergenic	13	39466561	39573514	106954	1	-147101	ENSBTAG00000020382	RIN2	Ras and Rab interactor 2
chr13	39566902	39567160	diffreps_chr13_39566901_39567160	1.1	0.000499501	0.00298436	Intron (NM_001102204/537459, intron 9 of 10)	13	39584307	39602877	18571	1	-17147	ENSBTAG00000001144	NAA20	N-alpha-acetyltransferase 20, NatB catalytic subunit
chr13	41628022	41628640	diffreps_chr13_41628021_41628640	1.06	8.41e-11	1.83e-09	Distal Intergenic	13	41851481	41855114	3634	2	226474	NA	THBD	thrombomodulin
chr13	41855722	41856340	diffreps_chr13_41855721_41856340	1.02	1.4e-09	2.49e-08	Promoter (<=1kb)	13	41851481	41855114	3634	2	-608	NA	THBD	thrombomodulin
chr13	41954522	41954740	diffreps_chr13_41954521_41954740	2.59	6.82e-09	1.1e-07	Distal Intergenic	13	42010060	42010117	58	2	55377	NA	MIR2285CC	microRNA mir-2285cc
chr13	42531542	42531920	diffreps_chr13_42531541_42531920	2.32	7.09e-13	2.08e-11	Distal Intergenic	13	42587065	42615875	28811	2	83955	ENSBTAG00000004278	APMAP	adipocyte plasma membrane associated protein
chr13	42672422	42673020	diffreps_chr13_42672421_42673020	1.18	1.94e-13	6.13e-12	Distal Intergenic	13	42622174	42666415	44242	2	-6007	ENSBTAG00000004281	ACSS1	acyl-CoA synthetase short chain family member 1
chr13	42896722	42897040	diffreps_chr13_42896721_42897040	2.29	7.53e-10	1.4e-08	Distal Intergenic	13	42879702	42893368	13667	1	17020	ENSBTAG00000039071	ANKRD16	ankyrin repeat domain 16
chr13	43116582	43116820	diffreps_chr13_43116581_43116820	1.08	0.00149996	0.00778578	Distal Intergenic	13	43143556	43144392	837	1	-26736	ENSBTAG00000013854	CALML5	calmodulin like 5
chr13	43922682	43922920	diffreps_chr13_43922681_43922920	1.2	0.000432598	0.00263091	Distal Intergenic	13	43896695	43897496	802	1	25987	NA	LOC515358	uncharacterized LOC515358
chr13	44933162	44933660	diffreps_chr13_44933161_44933660	1.16	1.86e-09	3.26e-08	Distal Intergenic	13	45107875	45160801	52927	2	227141	ENSBTAG00000002683	PFKP	phosphofructokinase, platelet
chr13	45033142	45033460	diffreps_chr13_45033141_45033460	3.39	4e-15	1.55e-13	Distal Intergenic	13	45107875	45160801	52927	2	127341	ENSBTAG00000002683	PFKP	phosphofructokinase, platelet
chr13	45034282	45034940	diffreps_chr13_45034281_45034940	1.26	8.98e-13	2.6e-11	Distal Intergenic	13	45107875	45160801	52927	2	125861	ENSBTAG00000002683	PFKP	phosphofructokinase, platelet
chr13	45134282	45134600	diffreps_chr13_45134281_45134600	1.07	0.00025099	0.00162259	Intron (NM_001193220/507119, intron 3 of 21)	13	45107875	45160801	52927	2	26201	ENSBTAG00000002683	PFKP	phosphofructokinase, platelet
chr13	47690642	47690860	diffreps_chr13_47690641_47690860	1.1	0.00147597	0.00767487	Distal Intergenic	13	47550275	47557600	7326	2	-133042	ENSBTAG00000015872	PROKR2	prokineticin receptor 2
chr13	50965742	50966040	diffreps_chr13_50965741_50966040	1.04	0.000366623	0.00227264	Intron (NM_001205439/527211, intron 1 of 6)	13	50950179	50985484	35306	2	19444	ENSBTAG00000001112	SMOX	spermine oxidase
chr13	51425502	51425860	diffreps_chr13_51425501_51425860	1.07	1.04e-05	9.29e-05	3' UTR	13	51422410	51425980	3571	1	3092	ENSBTAG00000006578	SPEF1	sperm flagellar 1
chr13	51993462	51993760	diffreps_chr13_51993461_51993760	1.23	2.15e-05	0.000178453	Intron (NM_001076282/613653, intron 6 of 7)	13	51988371	52001174	12804	2	7414	ENSBTAG00000013776	ITPA	inosine triphosphatase
chr13	52365242	52365920	diffreps_chr13_52365241_52365920	1.07	1.43e-11	3.48e-10	Distal Intergenic	13	52382863	52389209	6347	1	-16943	ENSBTAG00000011458	CPXM1	carboxypeptidase X, M14 family member 1
chr13	52482842	52483360	diffreps_chr13_52482841_52483360	1.46	2.52e-10	5.05e-09	Distal Intergenic	13	52514490	52519431	4942	1	-31130	ENSBTAG00000018813	IDH3B	isocitrate dehydrogenase (NAD(+)) 3 non-catalytic subunit beta
chr13	53765622	53766420	diffreps_chr13_53765621_53766420	2.7	0	0	Distal Intergenic	13	53773881	53774891	1011	1	-7461	ENSBTAG00000047704	NPBWR2	neuropeptides B and W receptor 2
chr13	53830902	53832920	diffreps_chr13_53830901_53832920	1.19	0	0	Distal Intergenic	13	53823431	53825286	1856	1	7471	ENSBTAG00000011662	SOX18	SRY-box transcription factor 18
chr13	53877102	53879120	diffreps_chr13_53877101_53879120	1.43	0	0	Distal Intergenic	13	53873121	53876746	3626	1	3981	ENSBTAG00000011655	SAMD10	sterile alpha motif domain containing 10
chr13	54012242	54013600	diffreps_chr13_54012241_54013600	1.04	0	0	Exon (NM_001192164/507985, exon 2 of 4)	13	53999130	54027412	28283	1	13112	ENSBTAG00000016667	ZBTB46	zinc finger and BTB domain containing 46
chr13	54066622	54068160	diffreps_chr13_54066621_54068160	1.07	0	0	Exon (NM_001097575/505721, exon 13 of 36)	13	54056133	54076535	20403	2	8375	ENSBTAG00000021096	RTEL1	regulator of telomere elongation helicase 1
chr13	54154382	54154780	diffreps_chr13_54154381_54154780	1.48	4.6e-08	6.35e-07	Intron (NM_001037464/515233, intron 2 of 7)	13	54152019	54159693	7675	1	2363	ENSBTAG00000021685	EEF1A2	eukaryotic translation elongation factor 1 alpha 2
chr13	54155762	54156080	diffreps_chr13_54155761_54156080	3.09	3.31e-14	1.15e-12	Exon (NM_001037464/515233, exon 4 of 8)	13	54152019	54159693	7675	1	3743	ENSBTAG00000021685	EEF1A2	eukaryotic translation elongation factor 1 alpha 2
chr13	54274822	54275660	diffreps_chr13_54274821_54275660	1.96	0	0	Distal Intergenic	13	54287348	54297677	10330	2	22017	ENSBTAG00000004916	ARFGAP1	ADP ribosylation factor GTPase activating protein 1
chr13	54294262	54294520	diffreps_chr13_54294261_54294520	1.01	0.000261725	0.0016819	Exon (NM_001075264/506471, exon 3 of 13)	13	54287348	54297677	10330	2	3157	ENSBTAG00000004916	ARFGAP1	ADP ribosylation factor GTPase activating protein 1
chr13	54326442	54327220	diffreps_chr13_54326441_54327220	1.65	0	0	Distal Intergenic	13	54332822	54345591	12770	1	-5602	ENSBTAG00000010383	YTHDF1	YTH N6-methyladenosine RNA binding protein 1
chr13	54350742	54351520	diffreps_chr13_54350741_54351520	1.08	1.26e-12	3.56e-11	Distal Intergenic	13	54355340	54355426	87	2	3906	ENSBTAG00000029962	MIR124B	microRNA mir-124b
chr13	54414282	54415580	diffreps_chr13_54414281_54415580	1.33	0	0	Distal Intergenic	13	54445588	54459936	14349	2	44356	ENSBTAG00000001829	SLC17A9	solute carrier family 17 member 9
chr13	54421562	54422020	diffreps_chr13_54421561_54422020	3.24	0	0	Distal Intergenic	13	54445588	54459936	14349	2	37916	ENSBTAG00000001829	SLC17A9	solute carrier family 17 member 9
chr13	54443302	54443860	diffreps_chr13_54443301_54443860	1.22	8.41e-11	1.83e-09	Downstream (1-2kb)	13	54445588	54459936	14349	2	16076	ENSBTAG00000001829	SLC17A9	solute carrier family 17 member 9
chr13	54592242	54592620	diffreps_chr13_54592241_54592620	1.17	5.93e-06	5.53e-05	Distal Intergenic	13	54576866	54581460	4595	2	-10782	ENSBTAG00000031716	MRGBP	MRG domain binding protein
chr13	54676242	54676460	diffreps_chr13_54676241_54676460	3.36	2.1e-11	4.97e-10	Exon (NM_001192727/507969, exon 8 of 12)	13	54609115	54658410	49296	2	-17832	ENSBTAG00000021727	NTSR1	neurotensin receptor 1
chr13	54851102	54853360	diffreps_chr13_54851101_54853360	1.13	0	0	Distal Intergenic	13	54866479	54867739	1261	2	14379	ENSBTAG00000020795	RPS21	ribosomal protein S21
chr13	54870762	54871660	diffreps_chr13_54870761_54871660	1.48	0	0	Distal Intergenic	13	54866479	54867739	1261	2	-3023	ENSBTAG00000020795	RPS21	ribosomal protein S21
chr13	55039282	55039660	diffreps_chr13_55039281_55039660	2.65	2.84e-14	9.99e-13	Exon (NM_001078095/768207, exon 2 of 11)	13	55018299	55025069	6771	2	-14213	ENSBTAG00000014442	MTG2	mitochondrial ribosome associated GTPase 2
chr13	55137702	55137920	diffreps_chr13_55137701_55137920	4.36	1.16e-13	3.76e-12	Distal Intergenic	13	55054377	55059927	5551	1	83325	ENSBTAG00000005127	PSMA7	proteasome 20S subunit alpha 7
chr13	55160402	55161080	diffreps_chr13_55160401_55161080	1.46	6.66e-16	2.85e-14	Distal Intergenic	13	55054377	55059927	5551	1	106025	ENSBTAG00000005127	PSMA7	proteasome 20S subunit alpha 7
chr13	56944762	56945060	diffreps_chr13_56944761_56945060	1.03	0.000529053	0.00313655	Distal Intergenic	13	56850176	56850235	60	2	-94527	NA	MIR2285BZ	microRNA mir-2285bz
chr13	56946562	56947680	diffreps_chr13_56946561_56947680	2.35	0	0	Distal Intergenic	13	56850176	56850235	60	2	-96327	NA	MIR2285BZ	microRNA mir-2285bz
chr13	56996082	56996840	diffreps_chr13_56996081_56996840	1.09	8.1e-14	2.67e-12	Distal Intergenic	13	57061094	57088790	27697	2	91950	ENSBTAG00000012109	EDN3	endothelin 3
chr13	58137722	58138260	diffreps_chr13_58137721_58138260	1.38	4.53e-11	1.02e-09	Distal Intergenic	13	58171991	58187785	15795	2	49525	ENSBTAG00000016926	C13H20orf85	chromosome 13 C20orf85 homolog
chr13	58578782	58579580	diffreps_chr13_58578781_58579580	1.66	0	0	Distal Intergenic	13	58609021	58615146	6126	2	35566	ENSBTAG00000001936	PCK1	phosphoenolpyruvate carboxykinase 1
chr13	58579882	58580540	diffreps_chr13_58579881_58580540	3.55	0	0	Distal Intergenic	13	58609021	58615146	6126	2	34606	ENSBTAG00000001936	PCK1	phosphoenolpyruvate carboxykinase 1
chr13	58580682	58581400	diffreps_chr13_58580681_58581400	1.16	2.37e-12	6.48e-11	Distal Intergenic	13	58609021	58615146	6126	2	33746	ENSBTAG00000001936	PCK1	phosphoenolpyruvate carboxykinase 1
chr13	58667082	58667400	diffreps_chr13_58667081_58667400	2.8	8.27e-13	2.4e-11	Intron (NM_001123365/100144618, intron 7 of 11)	13	58657726	58682600	24875	1	9356	ENSBTAG00000013079	CTCFL	CCCTC-binding factor like
chr13	59035482	59035880	diffreps_chr13_59035481_59035880	1.08	5.48e-08	7.48e-07	Distal Intergenic	13	58954605	58954673	69	1	80877	ENSBTAG00000044456	MIR2307	microRNA mir-2307
chr13	60314742	60316400	diffreps_chr13_60314741_60316400	1.17	0	0	Distal Intergenic	13	60290968	60306866	15899	1	23774	ENSBTAG00000003977	SLC52A3	solute carrier family 52 member 3
chr13	60493682	60493940	diffreps_chr13_60493681_60493940	2.45	4.24e-09	7.05e-08	Distal Intergenic	13	60508091	60565500	57410	1	-14151	ENSBTAG00000012341	CSNK2A1	casein kinase 2 alpha 1
chr13	60494622	60495000	diffreps_chr13_60494621_60495000	1.31	1.03e-07	1.33e-06	Distal Intergenic	13	60508091	60565500	57410	1	-13091	ENSBTAG00000012341	CSNK2A1	casein kinase 2 alpha 1
chr13	60671682	60672220	diffreps_chr13_60671681_60672220	3.55	0	0	3' UTR	13	60670296	60676670	6375	2	4450	ENSBTAG00000027387	NRSN2	neurensin 2
chr13	60689462	60689660	diffreps_chr13_60689461_60689660	1.2	0.000909702	0.00503933	Distal Intergenic	13	60670296	60676670	6375	2	-12792	ENSBTAG00000027387	NRSN2	neurensin 2
chr13	61137282	61138040	diffreps_chr13_61137281_61138040	1.75	0	0	Intron (NM_001046124/512534, intron 9 of 11)	13	61133471	61133526	56	1	3811	NA	MIR12010	microRNA mir-12010
chr13	61138582	61141160	diffreps_chr13_61138581_61141160	1.28	0	0	Exon (NM_001046124/512534, exon 10 of 12)	13	61133471	61133526	56	1	5111	NA	MIR12010	microRNA mir-12010
chr13	61544142	61544860	diffreps_chr13_61544141_61544860	1.12	1.21e-14	4.44e-13	Distal Intergenic	13	61563147	61608503	45357	1	-18287	ENSBTAG00000007932	HCK	HCK proto-oncogene, Src family tyrosine kinase
chr13	62064542	62065180	diffreps_chr13_62064541_62065180	3.15	0	0	Distal Intergenic	13	62102420	62130564	28145	2	65384	ENSBTAG00000016427	COMMD7	COMM domain containing 7
chr13	62152822	62153080	diffreps_chr13_62152821_62153080	1.77	1.11e-06	1.18e-05	Promoter (1-2kb)	13	62154536	62175437	20902	1	-1456	ENSBTAG00000003901	DNMT3B	DNA methyltransferase 3 beta
chr13	62242122	62242480	diffreps_chr13_62242121_62242480	1.33	1.78e-06	1.83e-05	Distal Intergenic	13	62276782	62297291	20510	2	54811	ENSBTAG00000013056	SUN5	Sad1 and UNC84 domain containing 5
chr13	62392962	62393500	diffreps_chr13_62392961_62393500	1.16	2.49e-12	6.77e-11	Distal Intergenic	13	62356043	62372303	16261	1	36919	ENSBTAG00000038687	BPIFB3	BPI fold containing family B member 3
chr13	62443062	62443540	diffreps_chr13_62443061_62443540	1.38	8.37e-10	1.54e-08	Distal Intergenic	13	62503682	62514221	10540	1	-60142	ENSBTAG00000009144	BPIFA2A	BPI fold containing family A, member 2A
chr13	62579182	62579560	diffreps_chr13_62579181_62579560	3.35	0	0	Distal Intergenic	13	62565989	62575207	9219	1	13193	ENSBTAG00000031376	BPIFA2C	BPI fold containing family A, member 2C
chr13	62769622	62770260	diffreps_chr13_62769621_62770260	1.3	1.35e-14	4.95e-13	Exon (NM_174697/282643, exon 5 of 15)	13	62764813	62785964	21152	1	4809	ENSBTAG00000015724	BPIFB1	BPI fold containing family B member 1
chr13	64538602	64539440	diffreps_chr13_64538601_64539440	1.13	0	0	Distal Intergenic	13	64547105	64552989	5885	2	13549	ENSBTAG00000011263	EIF6	eukaryotic translation initiation factor 6
chr13	64573542	64574380	diffreps_chr13_64573541_64574380	1.37	0	0	3' UTR	13	64547105	64552989	5885	2	-20553	ENSBTAG00000011263	EIF6	eukaryotic translation initiation factor 6
chr13	65857322	65857540	diffreps_chr13_65857321_65857540	3.59	9.26e-12	2.31e-10	Distal Intergenic	13	65811648	65827589	15942	2	-29733	ENSBTAG00000013915	DSN1	DSN1 component of MIS12 kinetochore complex
chr13	66220962	66221540	diffreps_chr13_66220961_66221540	1.28	8.21e-11	1.79e-09	Distal Intergenic	13	66207181	66216486	9306	2	-4476	ENSBTAG00000012710	GHRH	growth hormone releasing hormone
chr13	66329722	66330300	diffreps_chr13_66329721_66330300	1.55	2.74e-13	8.57e-12	Promoter (<=1kb)	13	66329744	66348650	18907	1	0	ENSBTAG00000008938	SRC	SRC proto-oncogene, non-receptor tyrosine kinase
chr13	66490662	66491400	diffreps_chr13_66490661_66491400	1.03	9.8e-14	3.22e-12	Distal Intergenic	13	66461376	66471861	10486	2	-18801	ENSBTAG00000003209	BLCAP	BLCAP apoptosis inducing factor
chr13	67095222	67096900	diffreps_chr13_67095221_67096900	1.01	0	0	Distal Intergenic	13	67002551	67037025	34475	2	-58197	ENSBTAG00000016208	TGM2	transglutaminase 2
chr13	67103442	67103820	diffreps_chr13_67103441_67103820	1.07	2.1e-05	0.000174779	Distal Intergenic	13	67002551	67037025	34475	2	-66417	ENSBTAG00000016208	TGM2	transglutaminase 2
chr13	67302622	67303020	diffreps_chr13_67302621_67303020	1.42	6.31e-08	8.51e-07	Distal Intergenic	13	67214930	67247271	32342	1	87692	ENSBTAG00000016864	LBP	lipopolysaccharide binding protein
chr13	67535982	67536380	diffreps_chr13_67535981_67536380	1.59	8e-09	1.27e-07	Distal Intergenic	13	67598734	67706157	107424	1	-62354	ENSBTAG00000000653	PPP1R16B	protein phosphatase 1 regulatory subunit 16B
chr13	67584782	67585200	diffreps_chr13_67584781_67585200	1.26	5.16e-07	5.88e-06	Distal Intergenic	13	67598734	67706157	107424	1	-13534	ENSBTAG00000000653	PPP1R16B	protein phosphatase 1 regulatory subunit 16B
chr13	67684622	67685160	diffreps_chr13_67684621_67685160	1.23	7.84e-11	1.71e-09	Intron (NM_174824/282091, intron 3 of 10)	13	67709006	67731980	22975	1	-23846	ENSBTAG00000000660	FAM83D	family with sequence similarity 83 member D
chr13	67710242	67710780	diffreps_chr13_67710241_67710780	1.06	1.83e-09	3.2e-08	Promoter (1-2kb)	13	67709006	67731980	22975	1	1236	ENSBTAG00000000660	FAM83D	family with sequence similarity 83 member D
chr13	67817382	67818800	diffreps_chr13_67817381_67818800	1.04	0	0	Distal Intergenic	13	67739235	67808169	68935	1	78147	ENSBTAG00000004039	DHX35	DEAH-box helicase 35
chr13	69634382	69635880	diffreps_chr13_69634381_69635880	1.17	0	0	Distal Intergenic	13	69684979	69780575	95597	1	-49099	ENSBTAG00000007960	TOP1	DNA topoisomerase I
chr13	69638782	69639360	diffreps_chr13_69638781_69639360	1.11	1.02e-13	3.34e-12	Distal Intergenic	13	69684979	69780575	95597	1	-45619	ENSBTAG00000007960	TOP1	DNA topoisomerase I
chr13	69820582	69821400	diffreps_chr13_69820581_69821400	1.34	0	0	Exon (NM_174425/281987, exon 26 of 32)	13	69790995	69822903	31909	1	29587	ENSBTAG00000017584	PLCG1	phospholipase C gamma 1
chr13	69982802	69983440	diffreps_chr13_69982801_69983440	1.16	2.01e-11	4.76e-10	Exon (NM_001354379/521637, exon 9 of 21)	13	69973201	69990650	17450	1	9601	ENSBTAG00000009165	LPIN3	lipin 3
chr13	7072702	7073080	diffreps_chr13_7072701_7073080	1.73	2.53e-09	4.33e-08	Intron (NM_001034577/532606, intron 10 of 12)	13	6988402	7238330	249929	2	165250	ENSBTAG00000021614	TASP1	taspase 1
chr13	72665162	72665440	diffreps_chr13_72665161_72665440	1.58	1.15e-05	0.000101633	Distal Intergenic	13	72669119	72679177	10059	2	13737	ENSBTAG00000016873	OSER1	oxidative stress responsive serine rich 1
chr13	72751882	72752180	diffreps_chr13_72751881_72752180	1.13	0.000230606	0.00150517	Promoter (<=1kb)	13	72746422	72752451	6030	2	271	ENSBTAG00000020030	FITM2	fat storage inducing transmembrane protein 2
chr13	72812982	72813340	diffreps_chr13_72812981_72813340	1.07	2.99e-05	0.000240945	Distal Intergenic	13	72825806	72855373	29568	1	-12466	ENSBTAG00000012116	HNF4A	hepatocyte nuclear factor 4 alpha
chr13	72892182	72892380	diffreps_chr13_72892181_72892380	2.6	3.16e-08	4.49e-07	Promoter (<=1kb)	13	72891431	72905729	14299	1	751	ENSBTAG00000018873	TTPAL	alpha tocopherol transfer protein like
chr13	73018262	73018700	diffreps_chr13_73018261_73018700	1.04	3.78e-06	3.67e-05	Intron (NM_205812/404169, intron 2 of 3)	13	73028617	73052069	23453	2	33369	ENSBTAG00000005280	ADA	adenosine deaminase
chr13	73083582	73084040	diffreps_chr13_73083581_73084040	1.73	1.38e-10	2.88e-09	Distal Intergenic	13	73111303	73125584	14282	1	-27263	ENSBTAG00000006037	CCN5	cellular communication network factor 5
chr13	73112822	73114100	diffreps_chr13_73112821_73114100	1.2	0	0	Promoter (1-2kb)	13	73111303	73125584	14282	1	1519	ENSBTAG00000006037	CCN5	cellular communication network factor 5
chr13	73322842	73323040	diffreps_chr13_73322841_73323040	2.63	1.63e-08	2.44e-07	Distal Intergenic	13	73297853	73319786	21934	1	24989	ENSBTAG00000016846	YWHAB	tyrosine 3-monooxygenase/tryptophan 5-monooxygenase activation protein beta
chr13	73636762	73637060	diffreps_chr13_73636761_73637060	1.02	0.000372075	0.00229936	Exon (NM_001191311/100139180, exon 9 of 10)	13	73649289	73659384	10096	1	-12229	ENSBTAG00000011283	RBPJL	recombination signal binding protein for immunoglobulin kappa J region like
chr13	73654002	73654240	diffreps_chr13_73654001_73654240	3.62	4.42e-12	1.16e-10	Exon (NM_001192353/540059, exon 6 of 12)	13	73636536	73650595	14060	2	-3407	ENSBTAG00000011279	MATN4	matrilin 4
chr13	74547382	74547760	diffreps_chr13_74547381_74547760	1.06	5.22e-06	4.93e-05	Distal Intergenic	13	74551371	74564779	13409	2	17019	ENSBTAG00000016742	WFDC3	WAP four-disulfide core domain 3
chr13	74725982	74726960	diffreps_chr13_74725981_74726960	1.26	0	0	Distal Intergenic	13	74698009	74716421	18413	2	-9561	ENSBTAG00000010130	ZNF335	zinc finger protein 335
chr13	74748122	74748740	diffreps_chr13_74748121_74748740	1.21	1.06e-09	1.92e-08	Promoter (1-2kb)	13	74746991	74754302	7312	1	1131	ENSBTAG00000020676	MMP9	matrix metallopeptidase 9
chr13	74851942	74852380	diffreps_chr13_74851941_74852380	1.08	1.08e-07	1.39e-06	Exon (NM_001105611/286849, exon 7 of 9)	13	74842418	74853117	10700	1	9524	ENSBTAG00000020736	CD40	CD40 molecule
chr13	75260302	75260840	diffreps_chr13_75260301_75260840	1.14	1.21e-10	2.56e-09	Intron (NM_001080288/526291, intron 10 of 12)	13	75242561	75249138	6578	2	-11164	ENSBTAG00000027327	OCSTAMP	osteoclast stimulatory transmembrane protein
chr13	76177662	76178120	diffreps_chr13_76177661_76178120	1.18	4.86e-07	5.56e-06	Exon (NM_001192938/533264, exon 9 of 21)	13	76156621	76281765	125145	2	103645	ENSBTAG00000007490	SULF2	sulfatase 2
chr13	76178302	76178800	diffreps_chr13_76178301_76178800	1.78	1.27e-13	4.09e-12	Intron (NM_001192938/533264, intron 8 of 20)	13	76156621	76281765	125145	2	102965	ENSBTAG00000007490	SULF2	sulfatase 2
chr13	76836942	76837440	diffreps_chr13_76836941_76837440	1.02	4.82e-07	5.52e-06	Distal Intergenic	13	77097880	77181358	83479	1	-260440	ENSBTAG00000007120	ARFGEF2	ADP ribosylation factor guanine nucleotide exchange factor 2
chr13	76869662	76870120	diffreps_chr13_76869661_76870120	1.62	1.15e-11	2.82e-10	Distal Intergenic	13	77097880	77181358	83479	1	-227760	ENSBTAG00000007120	ARFGEF2	ADP ribosylation factor guanine nucleotide exchange factor 2
chr13	77713562	77714000	diffreps_chr13_77713561_77714000	1.3	1.93e-09	3.36e-08	Distal Intergenic	13	77678234	77680698	2465	2	-32864	ENSBTAG00000053443	RUM1	syncytin-Rum1
chr13	77969202	77969700	diffreps_chr13_77969201_77969700	1.17	2.95e-08	4.23e-07	Distal Intergenic	13	77982558	77993066	10509	2	23366	ENSBTAG00000018063	SPATA2	spermatogenesis associated 2
chr13	77999522	77999740	diffreps_chr13_77999521_77999740	1.45	8.14e-05	0.000594456	Distal Intergenic	13	78003747	78017912	14166	1	-4007	ENSBTAG00000027317	RNF114	ring finger protein 114
chr13	78108062	78108580	diffreps_chr13_78108061_78108580	3.19	0	0	Distal Intergenic	13	78115183	78143121	27939	2	34541	ENSBTAG00000027316	UBE2V1	ubiquitin conjugating enzyme E2 V1
chr13	78108622	78110240	diffreps_chr13_78108621_78110240	1.19	0	0	Distal Intergenic	13	78115183	78143121	27939	2	32881	ENSBTAG00000027316	UBE2V1	ubiquitin conjugating enzyme E2 V1
chr13	78119322	78119720	diffreps_chr13_78119321_78119720	1.2	2.72e-06	2.71e-05	Intron (NM_001035497/617771, intron 2 of 3)	13	78115183	78143121	27939	2	23401	ENSBTAG00000027316	UBE2V1	ubiquitin conjugating enzyme E2 V1
chr13	78194502	78195060	diffreps_chr13_78194501_78195060	1.35	1.74e-11	4.16e-10	Distal Intergenic	13	78205757	78206803	1047	1	-10697	ENSBTAG00000051972	CEBPB	CCAAT enhancer binding protein beta
chr13	78200422	78202700	diffreps_chr13_78200421_78202700	1.15	0	0	Distal Intergenic	13	78205757	78206803	1047	1	-3057	ENSBTAG00000051972	CEBPB	CCAAT enhancer binding protein beta
chr13	78491382	78492080	diffreps_chr13_78491381_78492080	1.22	4.44e-16	1.93e-14	Distal Intergenic	13	78534187	78594858	60672	1	-42107	ENSBTAG00000006616	PTPN1	protein tyrosine phosphatase non-receptor type 1
chr13	78611382	78611740	diffreps_chr13_78611381_78611740	3.09	1.89e-15	7.68e-14	Distal Intergenic	13	78534187	78594858	60672	1	77195	ENSBTAG00000006616	PTPN1	protein tyrosine phosphatase non-receptor type 1
chr13	78611962	78612420	diffreps_chr13_78611961_78612420	1.39	2.46e-09	4.24e-08	Distal Intergenic	13	78534187	78594858	60672	1	77775	ENSBTAG00000006616	PTPN1	protein tyrosine phosphatase non-receptor type 1
chr13	78612622	78612840	diffreps_chr13_78612621_78612840	2.63	1.63e-08	2.44e-07	Distal Intergenic	13	78534187	78594858	60672	1	78435	ENSBTAG00000006616	PTPN1	protein tyrosine phosphatase non-receptor type 1
chr13	78613082	78613340	diffreps_chr13_78613081_78613340	4.51	2.44e-15	9.79e-14	Distal Intergenic	13	78534187	78594858	60672	1	78895	ENSBTAG00000006616	PTPN1	protein tyrosine phosphatase non-receptor type 1
chr13	78770042	78770480	diffreps_chr13_78770041_78770480	2.34	7.55e-15	2.84e-13	Intron (NM_001076474/617710, intron 2 of 4)	13	78752441	78808954	56514	1	17601	ENSBTAG00000038929	BCAS4	breast carcinoma amplified sequence 4
chr13	79173382	79173880	diffreps_chr13_79173381_79173880	1.29	2.6e-08	3.76e-07	Distal Intergenic	13	78918165	78923346	5182	2	-250036	ENSBTAG00000003398	KCNG1	potassium voltage-gated channel modifier subfamily G member 1
chr13	79176242	79176600	diffreps_chr13_79176241_79176600	1.15	8.85e-06	8.01e-05	Distal Intergenic	13	78918165	78923346	5182	2	-252896	ENSBTAG00000003398	KCNG1	potassium voltage-gated channel modifier subfamily G member 1
chr13	81103482	81103720	diffreps_chr13_81103481_81103720	1.17	0.00021952	0.00144129	Distal Intergenic	13	81425069	81490883	65815	2	387163	NA	BCAS1	brain enriched myelin associated protein 1
chr13	81362082	81362560	diffreps_chr13_81362081_81362560	1.51	1.22e-10	2.57e-09	Distal Intergenic	13	81425069	81490883	65815	2	128323	NA	BCAS1	brain enriched myelin associated protein 1
chr13	81424442	81424860	diffreps_chr13_81424441_81424860	3.54	0	0	Downstream (<1kb)	13	81425069	81490883	65815	2	66023	NA	BCAS1	brain enriched myelin associated protein 1
chr13	81516962	81517600	diffreps_chr13_81516961_81517600	1.27	1.45e-13	4.64e-12	Distal Intergenic	13	81425069	81490883	65815	2	-26079	NA	BCAS1	brain enriched myelin associated protein 1
chr13	81579782	81580600	diffreps_chr13_81579781_81580600	1.1	3.33e-16	1.47e-14	Distal Intergenic	13	81592182	81610449	18268	2	29849	ENSBTAG00000002765	CYP24A1	cytochrome P450, family 24, subfamily A, polypeptide 1
chr13	82037922	82038220	diffreps_chr13_82037921_82038220	1.1	0.00016806	0.00113676	Intron (NM_001075939/530813, intron 7 of 7)	13	81893784	82044528	150745	1	144138	ENSBTAG00000047975	DOK5	docking protein 5
chr14	1016322	1017580	diffreps_chr14_1016321_1017580	1.11	0	0	Distal Intergenic	14	1040716	1046457	5742	2	28877	ENSBTAG00000019864	MAPK15	mitogen-activated protein kinase 15
chr14	1052602	1053120	diffreps_chr14_1052601_1053120	1.09	6.62e-09	1.07e-07	Distal Intergenic	14	1058869	1060642	1774	1	-5749	ENSBTAG00000040360	CCDC166	coiled-coil domain containing 166
chr14	1135322	1136400	diffreps_chr14_1135321_1136400	3.19	0	0	Distal Intergenic	14	1127505	1130654	3150	1	7817	ENSBTAG00000014642	NAPRT	nicotinate phosphoribosyltransferase
chr14	1160842	1161240	diffreps_chr14_1160841_1161240	3.01	0	0	Distal Intergenic	14	1140710	1147228	6519	2	-13614	ENSBTAG00000021474	GSDMD	gasdermin D
chr14	1258282	1258800	diffreps_chr14_1258281_1258800	3.24	0	0	Distal Intergenic	14	1361059	1363513	2455	1	-102259	ENSBTAG00000011939	LY6H	lymphocyte antigen 6 family member H
chr14	1259442	1260560	diffreps_chr14_1259441_1260560	1.08	0	0	Distal Intergenic	14	1361059	1363513	2455	1	-100499	ENSBTAG00000011939	LY6H	lymphocyte antigen 6 family member H
chr14	1262302	1262860	diffreps_chr14_1262301_1262860	1.01	7.89e-09	1.26e-07	Distal Intergenic	14	1361059	1363513	2455	1	-98199	ENSBTAG00000011939	LY6H	lymphocyte antigen 6 family member H
chr14	14535962	14536320	diffreps_chr14_14535961_14536320	1.66	4.23e-08	5.89e-07	Distal Intergenic	14	14779050	14787206	8157	2	250886	ENSBTAG00000023179	TRIB1	tribbles pseudokinase 1
chr14	14558382	14558960	diffreps_chr14_14558381_14558960	1.09	1.2e-09	2.18e-08	Distal Intergenic	14	14779050	14787206	8157	2	228246	ENSBTAG00000023179	TRIB1	tribbles pseudokinase 1
chr14	15220202	15220680	diffreps_chr14_15220201_15220680	1.27	7.49e-10	1.39e-08	Distal Intergenic	14	15178241	15204856	26616	2	-15346	ENSBTAG00000009072	ZNF572	zinc finger protein 572
chr14	15541342	15541940	diffreps_chr14_15541341_15541940	1.54	6.02e-14	2.03e-12	Intron (NM_001192581/523498, intron 10 of 13)	14	15553533	15560939	7407	2	18999	ENSBTAG00000020405	NDUFB9	NADH:ubiquinone oxidoreductase subunit B9
chr14	15546982	15547640	diffreps_chr14_15546981_15547640	1.24	2.05e-12	5.65e-11	Exon (NM_001192581/523498, exon 12 of 14)	14	15553533	15560939	7407	2	13299	ENSBTAG00000020405	NDUFB9	NADH:ubiquinone oxidoreductase subunit B9
chr14	1658822	1659500	diffreps_chr14_1658821_1659500	1.29	2.05e-14	7.35e-13	Distal Intergenic	14	1656534	1658172	1639	1	2288	ENSBTAG00000034498	LY6D	lymphocyte antigen 6 family member D
chr14	1662962	1663400	diffreps_chr14_1662961_1663400	1.1	1.05e-07	1.36e-06	Distal Intergenic	14	1669740	1671837	2098	1	-6340	ENSBTAG00000005762	LYNX1	Ly6/neurotoxin 1
chr14	1691722	1692720	diffreps_chr14_1691721_1692720	1.05	2.22e-16	9.84e-15	Downstream (1-2kb)	14	1694330	1697806	3477	2	5086	ENSBTAG00000005063	THEM6	thioesterase superfamily member 6
chr14	1796502	1797020	diffreps_chr14_1796501_1797020	1.25	2.06e-10	4.17e-09	Downstream (<1kb)	14	1741249	1743574	2326	1	55253	ENSBTAG00000021639	ARC	activity regulated cytoskeleton associated protein
chr14	1853162	1853840	diffreps_chr14_1853161_1853840	1.61	1.33e-15	5.52e-14	Intron (NM_001191541/524070, intron 1 of 29)	14	1797345	1862330	64986	2	8490	ENSBTAG00000006385	ADGRB1	adhesion G protein-coupled receptor B1
chr14	1854722	1856220	diffreps_chr14_1854721_1856220	2.52	0	0	Intron (NM_001191541/524070, intron 1 of 29)	14	1797345	1862330	64986	2	6110	ENSBTAG00000006385	ADGRB1	adhesion G protein-coupled receptor B1
chr14	19668362	19668820	diffreps_chr14_19668361_19668820	1.04	8.35e-08	1.1e-06	Distal Intergenic	14	19593065	19612895	19831	1	75297	ENSBTAG00000023218	UBE2V2	ubiquitin conjugating enzyme E2 V2
chr14	19948502	19949140	diffreps_chr14_19948501_19949140	1.07	2.84e-11	6.61e-10	Distal Intergenic	14	19941414	19945016	3603	2	-3486	ENSBTAG00000013227	SNAI2	snail family transcriptional repressor 2
chr14	21107062	21107580	diffreps_chr14_21107061_21107580	1.35	4.36e-09	7.24e-08	Distal Intergenic	14	21013840	21062048	48209	2	-45014	ENSBTAG00000017492	PCMTD1	protein-L-isoaspartate (D-aspartate) O-methyltransferase domain containing 1
chr14	22032162	22032560	diffreps_chr14_22032161_22032560	2.12	4.22e-12	1.11e-10	Distal Intergenic	14	22017578	22023133	5556	1	14584	ENSBTAG00000001174	MRPL15	mitochondrial ribosomal protein L15
chr14	2489342	2489760	diffreps_chr14_2489341_2489760	1.48	1.45e-08	2.2e-07	Distal Intergenic	14	2553480	2561149	7670	2	71389	ENSBTAG00000046467	PTP4A3	protein tyrosine phosphatase 4A3
chr14	2592322	2593580	diffreps_chr14_2592321_2593580	1.05	0	0	Distal Intergenic	14	2553480	2561149	7670	2	-31173	ENSBTAG00000046467	PTP4A3	protein tyrosine phosphatase 4A3
chr14	2623082	2624780	diffreps_chr14_2623081_2624780	1.18	0	0	Distal Intergenic	14	2553480	2561149	7670	2	-61933	ENSBTAG00000046467	PTP4A3	protein tyrosine phosphatase 4A3
chr14	2720402	2720740	diffreps_chr14_2720401_2720740	1.06	2.12e-05	0.000176712	Distal Intergenic	14	2844183	3037069	192887	1	-123443	ENSBTAG00000009578	PTK2	protein tyrosine kinase 2
chr14	2746102	2746400	diffreps_chr14_2746101_2746400	3.29	7.03e-14	2.34e-12	Distal Intergenic	14	2844183	3037069	192887	1	-97783	ENSBTAG00000009578	PTK2	protein tyrosine kinase 2
chr14	2811342	2811840	diffreps_chr14_2811341_2811840	1.66	1.21e-12	3.43e-11	Distal Intergenic	14	2844183	3037069	192887	1	-32343	ENSBTAG00000009578	PTK2	protein tyrosine kinase 2
chr14	30768242	30768520	diffreps_chr14_30768241_30768520	1.02	0.000762798	0.00432634	Intron (NM_001076475/617724, intron 4 of 5)	14	30748671	30774946	26276	1	19571	ENSBTAG00000002192	VXN	vexin
chr14	31003342	31003780	diffreps_chr14_31003341_31003780	1.02	1.56e-05	0.000133607	Intron (NM_001193021/504480, intron 1 of 16)	14	30994346	31055075	60730	1	8996	ENSBTAG00000013284	SGK3	serum/glucocorticoid regulated kinase family, member 3
chr14	323882	325340	diffreps_chr14_323881_325340	1.41	0	0	Promoter (<=1kb)	14	321230	323826	2597	2	-56	ENSBTAG00000026327	RPL8	ribosomal protein L8
chr14	3356542	3357020	diffreps_chr14_3356541_3357020	1.31	5.43e-09	8.9e-08	Intron (NM_001037474/533451, intron 16 of 21)	14	3310118	3310175	58	1	46424	NA	MIR12027	microRNA mir-12027
chr14	343562	344300	diffreps_chr14_343561_344300	1.38	0	0	Distal Intergenic	14	347689	349724	2036	2	5424	ENSBTAG00000018455	COMMD5	COMM domain containing 5
chr14	435722	436260	diffreps_chr14_435721_436260	1.14	4.97e-10	9.47e-09	Promoter (<=1kb)	14	434999	437076	2078	2	816	ENSBTAG00000007838	MFSD3	major facilitator superfamily domain containing 3
chr14	43872662	43873180	diffreps_chr14_43872661_43873180	2.31	0	0	Intron (NM_001205753/513243, intron 3 of 7)	14	43837811	44026405	188595	2	153225	ENSBTAG00000021743	ZNF704	zinc finger protein 704
chr14	44201682	44202180	diffreps_chr14_44201681_44202180	1.26	9.98e-09	1.56e-07	Distal Intergenic	14	43837811	44026405	188595	2	-175277	ENSBTAG00000021743	ZNF704	zinc finger protein 704
chr14	448882	449380	diffreps_chr14_448881_449380	1.26	4.91e-09	8.08e-08	Promoter (<=1kb)	14	443246	448420	5175	2	-462	ENSBTAG00000007834	PPP1R16A	protein phosphatase 1 regulatory subunit 16A
chr14	61773842	61774360	diffreps_chr14_61773841_61774360	1.04	1.05e-08	1.63e-07	Exon (NM_001168462/522795, exon 3 of 4)	14	61770393	61776503	6111	1	3449	ENSBTAG00000014396	KLF10	Kruppel like factor 10
chr14	61798882	61799360	diffreps_chr14_61798881_61799360	1.13	1.18e-08	1.82e-07	Distal Intergenic	14	61770393	61776503	6111	1	28489	ENSBTAG00000014396	KLF10	Kruppel like factor 10
chr14	61829642	61829840	diffreps_chr14_61829641_61829840	4.77	6.75e-13	1.99e-11	Distal Intergenic	14	61844560	61854021	9462	2	24181	ENSBTAG00000003445	ODF1	outer dense fiber of sperm tails 1
chr14	637722	638500	diffreps_chr14_637721_638500	2.89	0	0	Distal Intergenic	14	614024	633734	19711	2	-3988	ENSBTAG00000020751	HSF1	heat shock transcription factor 1
chr14	66079282	66079800	diffreps_chr14_66079281_66079800	1.24	2.61e-09	4.47e-08	Distal Intergenic	14	66086238	66115081	28844	2	35281	ENSBTAG00000012596	POP1	POP1 homolog, ribonuclease P/MRP subunit
chr14	669062	669400	diffreps_chr14_669061_669400	1.48	4.66e-07	5.36e-06	Exon (NM_001102018/515055, exon 22 of 43)	14	691785	691856	72	2	22456	ENSBTAG00000054104	MIR1839	microRNA mir-1839
chr14	67986462	67986760	diffreps_chr14_67986461_67986760	1.23	6.53e-05	0.000486295	Promoter (<=1kb)	14	67986645	67991358	4714	1	0	ENSBTAG00000001521	UQCRB	ubiquinol-cytochrome c reductase binding protein
chr14	7116642	7116840	diffreps_chr14_7116641_7116840	1.31	0.000518548	0.00308334	Distal Intergenic	14	7045567	7045654	88	1	71075	ENSBTAG00000029972	MIR30B	microRNA mir-30b
chr14	7120122	7120660	diffreps_chr14_7120121_7120660	1.03	3.01e-08	4.31e-07	Distal Intergenic	14	7045567	7045654	88	1	74555	ENSBTAG00000029972	MIR30B	microRNA mir-30b
chr14	738762	740000	diffreps_chr14_738761_740000	1.17	0	0	Promoter (<=1kb)	14	738121	740518	2398	2	518	ENSBTAG00000012232	CYC1	cytochrome c1
chr14	76190782	76191580	diffreps_chr14_76190781_76191580	1.12	3.35e-14	1.16e-12	Intron (NM_001037600/513788, intron 1 of 9)	14	76178740	76212527	33788	1	12042	ENSBTAG00000015734	RMDN1	regulator of microtubule dynamics 1
chr14	7866062	7866820	diffreps_chr14_7866061_7866820	1.57	1.11e-16	5.11e-15	Distal Intergenic	14	7936775	7951923	15149	1	-69955	ENSBTAG00000001156	ST3GAL1	ST3 beta-galactoside alpha-2,3-sialyltransferase 1
chr14	7946162	7946600	diffreps_chr14_7946161_7946600	1.15	1.11e-08	1.71e-07	Exon (NM_001097983/282351, exon 4 of 6)	14	7936775	7951923	15149	1	9387	ENSBTAG00000001156	ST3GAL1	ST3 beta-galactoside alpha-2,3-sialyltransferase 1
chr14	8139082	8140120	diffreps_chr14_8139081_8140120	1.57	0	0	Distal Intergenic	14	8073250	8129607	56358	1	65832	ENSBTAG00000000711	NDRG1	N-myc downstream regulated 1
chr14	81472282	81472540	diffreps_chr14_81472281_81472540	1.43	2.7e-05	0.000219907	Distal Intergenic	14	81286837	81402413	115577	1	185445	ENSBTAG00000015341	DEPTOR	DEP domain containing MTOR interacting protein
chr14	8152782	8155380	diffreps_chr14_8152781_8155380	1.4	0	0	Distal Intergenic	14	8073250	8129607	56358	1	79532	ENSBTAG00000000711	NDRG1	N-myc downstream regulated 1
chr14	8155422	8156320	diffreps_chr14_8155421_8156320	1.59	0	0	Distal Intergenic	14	8073250	8129607	56358	1	82172	ENSBTAG00000000711	NDRG1	N-myc downstream regulated 1
chr14	834882	837180	diffreps_chr14_834881_837180	1.74	0	0	Distal Intergenic	14	826755	829968	3214	2	-4914	ENSBTAG00000000312	GRINA	glutamate ionotropic receptor NMDA type subunit associated protein 1
chr14	839162	839520	diffreps_chr14_839161_839520	1.55	2.39e-07	2.91e-06	Distal Intergenic	14	826755	829968	3214	2	-9194	ENSBTAG00000000312	GRINA	glutamate ionotropic receptor NMDA type subunit associated protein 1
chr14	862302	863600	diffreps_chr14_862301_863600	1.22	0	0	Distal Intergenic	14	879199	879273	75	1	-15599	ENSBTAG00000044263	MIR2309	microRNA mir-2309
chr15	22424382	22424720	diffreps_chr15_22424381_22424720	1.09	8.4e-05	0.00061119	Distal Intergenic	15	22397488	22409057	11570	1	26894	ENSBTAG00000016266	SDHD	succinate dehydrogenase complex subunit D
chr15	24524242	24524500	diffreps_chr15_24524241_24524500	1.08	0.000247726	0.00160284	Distal Intergenic	15	24505232	24518059	12828	1	19010	ENSBTAG00000010791	HTR3A	5-hydroxytryptamine receptor 3A
chr15	24792662	24792860	diffreps_chr15_24792661_24792860	3.48	8.45e-11	1.83e-09	Distal Intergenic	15	24920578	24927874	7297	1	-127718	ENSBTAG00000008219	RBM7	RNA binding motif protein 7
chr15	26906382	26906920	diffreps_chr15_26906381_26906920	1.01	3.98e-09	6.65e-08	Distal Intergenic	15	27406275	27430917	24643	2	523997	ENSBTAG00000016855	BUD13	BUD13 homolog
chr15	27351302	27351740	diffreps_chr15_27351301_27351740	3.93	0	0	Distal Intergenic	15	27406275	27430917	24643	2	79177	ENSBTAG00000016855	BUD13	BUD13 homolog
chr15	28472162	28472700	diffreps_chr15_28472161_28472700	1.24	2.14e-10	4.32e-09	Distal Intergenic	15	28480087	28487598	7512	2	14898	ENSBTAG00000009828	FXYD2	FXYD domain containing ion transport regulator 2
chr15	28477322	28477960	diffreps_chr15_28477321_28477960	1.08	1e-11	2.49e-10	Downstream (2-3kb)	15	28480087	28487598	7512	2	9638	ENSBTAG00000009828	FXYD2	FXYD domain containing ion transport regulator 2
chr15	28520402	28520740	diffreps_chr15_28520401_28520740	1.1	1.39e-05	0.00012115	Intron (NM_001034399/511064, intron 1 of 7)	15	28497533	28534109	36577	2	13369	ENSBTAG00000014354	FXYD6	FXYD domain containing ion transport regulator 6
chr15	28731182	28731420	diffreps_chr15_28731181_28731420	1.87	7.81e-07	8.6e-06	Distal Intergenic	15	28761713	28801594	39882	1	-30293	ENSBTAG00000021518	TMPRSS4	transmembrane serine protease 4
chr15	28864542	28865100	diffreps_chr15_28864541_28865100	1.21	6.21e-11	1.37e-09	Intron (NM_001192074/538722, intron 1 of 3)	15	28859147	28871046	11900	2	5946	ENSBTAG00000054592	SCN2B	sodium voltage-gated channel beta subunit 2
chr15	29311382	29313820	diffreps_chr15_29311381_29313820	1.59	0	0	Exon (NM_001192570/522889, exon 8 of 15)	15	29310851	29323109	12259	2	9289	ENSBTAG00000016202	TREH	trehalase
chr15	29333342	29335900	diffreps_chr15_29333341_29335900	2.4	0	0	Intron (NM_174214/281569, intron 1 of 6)	15	29310851	29323109	12259	2	-10233	ENSBTAG00000016202	TREH	trehalase
chr15	29545102	29547360	diffreps_chr15_29545101_29547360	1.43	0	0	5' UTR	15	29580727	29588723	7997	1	-33367	ENSBTAG00000017932	CENATAC	centrosomal AT-AC splicing factor
chr15	29584762	29585160	diffreps_chr15_29584761_29585160	1.27	2.41e-07	2.94e-06	Exon (NM_001075561/512413, exon 6 of 11)	15	29580727	29588723	7997	1	4035	ENSBTAG00000017932	CENATAC	centrosomal AT-AC splicing factor
chr15	29674722	29675100	diffreps_chr15_29674721_29675100	1.24	1.15e-06	1.23e-05	Promoter (<=1kb)	15	29674361	29675675	1315	2	575	NA	H2AX	H2A.X variant histone
chr15	29768442	29769240	diffreps_chr15_29768441_29769240	1.5	0	0	Promoter (<=1kb)	15	29770007	29775411	5405	1	-767	ENSBTAG00000012507	PDZD3	PDZ domain containing 3
chr15	29901382	29902140	diffreps_chr15_29901381_29902140	1.23	1.11e-14	4.1e-13	Distal Intergenic	15	29886833	29894588	7756	2	-6794	ENSBTAG00000006835	MCAM	melanoma cell adhesion molecule
chr15	29952742	29953160	diffreps_chr15_29952741_29953160	3.1	0	0	Intron (NM_001046263/522980, intron 1 of 12)	15	29936971	29958822	21852	2	5662	ENSBTAG00000009749	USP2	ubiquitin specific peptidase 2
chr15	30040802	30041460	diffreps_chr15_30040801_30041460	1.42	9.33e-15	3.47e-13	Distal Intergenic	15	29981019	29986913	5895	2	-53889	ENSBTAG00000019627	THY1	Thy-1 cell surface antigen
chr15	30042082	30042380	diffreps_chr15_30042081_30042380	3.43	6.73e-14	2.25e-12	Distal Intergenic	15	29981019	29986913	5895	2	-55169	ENSBTAG00000019627	THY1	Thy-1 cell surface antigen
chr15	30170502	30171020	diffreps_chr15_30170501_30171020	1.45	4.11e-12	1.09e-10	Distal Intergenic	15	30197485	30197582	98	1	-26465	ENSBTAG00000052801	MIR378B	microRNA mir-378b
chr15	30735222	30737820	diffreps_chr15_30735221_30737820	1.39	0	0	Distal Intergenic	15	30685077	30712148	27072	2	-23074	ENSBTAG00000009419	TRIM29	tripartite motif containing 29
chr15	30801042	30801800	diffreps_chr15_30801041_30801800	1.07	8.55e-14	2.81e-12	Distal Intergenic	15	30816996	30903525	86530	1	-15196	ENSBTAG00000021340	POU2F3	POU class 2 homeobox 3
chr15	30801822	30802840	diffreps_chr15_30801821_30802840	1.66	0	0	Distal Intergenic	15	30816996	30903525	86530	1	-14156	ENSBTAG00000021340	POU2F3	POU class 2 homeobox 3
chr15	30806342	30806680	diffreps_chr15_30806341_30806680	1.21	5.41e-06	5.09e-05	Distal Intergenic	15	30816996	30903525	86530	1	-10316	ENSBTAG00000021340	POU2F3	POU class 2 homeobox 3
chr15	30811422	30812480	diffreps_chr15_30811421_30812480	1.01	0	0	Distal Intergenic	15	30816996	30903525	86530	1	-4516	ENSBTAG00000021340	POU2F3	POU class 2 homeobox 3
chr15	30887842	30888160	diffreps_chr15_30887841_30888160	1.05	0.000179445	0.00120398	Intron (NM_001205830/516493, intron 6 of 12)	15	30911896	30918654	6759	1	-23736	ENSBTAG00000021342	TLCD5	TLC domain containing 5
chr15	34176702	34177340	diffreps_chr15_34176701_34177340	1.35	2.02e-12	5.58e-11	Exon (NM_001191419/517332, exon 3 of 20)	15	34231050	34253814	22765	2	76474	ENSBTAG00000016768	SCN3B	sodium voltage-gated channel beta subunit 3
chr15	34179962	34180460	diffreps_chr15_34179961_34180460	1.09	3.77e-08	5.29e-07	Intron (NM_001191419/517332, intron 3 of 19)	15	34231050	34253814	22765	2	73354	ENSBTAG00000016768	SCN3B	sodium voltage-gated channel beta subunit 3
chr15	34520902	34521480	diffreps_chr15_34520901_34521480	2.06	0	0	Intron (NM_001076021/534377, intron 8 of 10)	15	34481913	34730053	248141	1	38989	ENSBTAG00000005340	SERGEF	secretion regulating guanine nucleotide exchange factor
chr15	34526802	34527000	diffreps_chr15_34526801_34527000	1.77	1.47e-05	0.000126712	Intron (NM_001076021/534377, intron 8 of 10)	15	34481913	34730053	248141	1	44889	ENSBTAG00000005340	SERGEF	secretion regulating guanine nucleotide exchange factor
chr15	35665082	35666020	diffreps_chr15_35665081_35666020	1.15	3.33e-16	1.47e-14	Distal Intergenic	15	35689575	35716099	26525	2	50079	ENSBTAG00000006755	C15H11orf58	chromosome 15 C11orf58 homolog
chr15	36568742	36569840	diffreps_chr15_36568741_36569840	1.66	0	0	Distal Intergenic	15	36065303	36542301	476999	1	503439	ENSBTAG00000044185	SOX6	SRY-box transcription factor 6
chr15	37384442	37384800	diffreps_chr15_37384441_37384800	3.07	3.77e-15	1.48e-13	Intron (NM_001205483/784497, intron 7 of 12)	15	37342907	37482577	139671	2	97777	ENSBTAG00000032782	INSC	INSC spindle orientation adaptor protein
chr15	39466222	39466840	diffreps_chr15_39466221_39466840	1.39	1.02e-12	2.92e-11	Distal Intergenic	15	39286454	39394430	107977	2	-71792	ENSBTAG00000013029	ARNTL	aryl hydrocarbon receptor nuclear translocator like
chr15	40092102	40092420	diffreps_chr15_40092101_40092420	1.15	0.000225277	0.00147378	Distal Intergenic	15	40169481	40347128	177648	2	254708	ENSBTAG00000000700	PARVA	parvin alpha
chr15	40309402	40309760	diffreps_chr15_40309401_40309760	1.1	9.81e-06	8.81e-05	Intron (NM_001099144/615430, intron 1 of 12)	15	40169481	40347128	177648	2	37368	ENSBTAG00000000700	PARVA	parvin alpha
chr15	40388642	40389140	diffreps_chr15_40388641_40389140	1.67	3.73e-12	9.9e-11	Distal Intergenic	15	40169481	40347128	177648	2	-41514	ENSBTAG00000000700	PARVA	parvin alpha
chr15	40434482	40435300	diffreps_chr15_40434481_40435300	1.12	7.77e-16	3.31e-14	Distal Intergenic	15	40169481	40347128	177648	2	-87354	ENSBTAG00000000700	PARVA	parvin alpha
chr15	40660322	40661660	diffreps_chr15_40660321_40661660	1.51	0	0	Distal Intergenic	15	40685311	40735281	49971	1	-23651	ENSBTAG00000004275	DKK3	dickkopf WNT signaling pathway inhibitor 3
chr15	41349162	41349680	diffreps_chr15_41349161_41349680	1.4	3.71e-11	8.46e-10	Intron (NM_001076316/614203, intron 6 of 10)	15	41064404	41419990	355587	1	284758	ENSBTAG00000002914	GALNT18	polypeptide N-acetylgalactosaminyltransferase 18
chr15	41494882	41495240	diffreps_chr15_41494881_41495240	1.54	1.1e-07	1.42e-06	Distal Intergenic	15	41816381	41821678	5298	1	-321141	ENSBTAG00000010568	ZBED5	zinc finger BED-type containing 5
chr15	41599342	41599720	diffreps_chr15_41599341_41599720	1.34	2.93e-08	4.21e-07	Distal Intergenic	15	41816381	41821678	5298	1	-216661	ENSBTAG00000010568	ZBED5	zinc finger BED-type containing 5
chr15	41673722	41673980	diffreps_chr15_41673721_41673980	1.03	0.00108791	0.00589308	Distal Intergenic	15	41816381	41821678	5298	1	-142401	ENSBTAG00000010568	ZBED5	zinc finger BED-type containing 5
chr15	41940682	41940940	diffreps_chr15_41940681_41940940	2.13	2.82e-08	4.06e-07	Distal Intergenic	15	41898894	41923888	24995	2	-16794	ENSBTAG00000015566	CTR9	CTR9 homolog, Paf1/RNA polymerase II complex component
chr15	42045242	42045820	diffreps_chr15_42045241_42045820	1.32	1.37e-10	2.86e-09	Intron (NM_174392/281918, intron 9 of 20)	15	42102179	42116470	14292	1	-56359	ENSBTAG00000000802	LYVE1	lymphatic vessel endothelial hyaluronan receptor 1
chr15	43741782	43742200	diffreps_chr15_43741781_43742200	1.37	7.73e-08	1.03e-06	Distal Intergenic	15	43744838	43870871	126034	1	-2638	ENSBTAG00000005356	DENND2B	DENN domain containing 2B
chr15	44284902	44285540	diffreps_chr15_44284901_44285540	1.12	4.17e-12	1.1e-10	Promoter (<=1kb)	15	44285656	44323116	37461	1	-116	ENSBTAG00000016320	LMO1	LIM domain only 1
chr15	44321122	44322020	diffreps_chr15_44321121_44322020	1.58	0	0	Exon (NM_001075895/527152, exon 3 of 4)	15	44307107	44307164	58	1	14015	NA	MIR2285BX	microRNA mir-2285bx
chr15	44322742	44323080	diffreps_chr15_44322741_44323080	3.87	0	0	3' UTR	15	44307107	44307164	58	1	15635	NA	MIR2285BX	microRNA mir-2285bx
chr15	44346822	44347340	diffreps_chr15_44346821_44347340	1.37	3.03e-10	6e-09	Distal Intergenic	15	44368149	44429696	61548	1	-20809	ENSBTAG00000004863	RIC3	RIC3 acetylcholine receptor chaperone
chr15	44440042	44440320	diffreps_chr15_44440041_44440320	2.56	7.01e-11	1.54e-09	Exon (NM_001192160/539051, exon 9 of 12)	15	44437018	44457846	20829	2	17526	ENSBTAG00000004862	TUB	TUB bipartite transcription factor
chr15	44446722	44447220	diffreps_chr15_44446721_44447220	1.78	8.07e-12	2.03e-10	Intron (NM_001192160/539051, intron 3 of 11)	15	44437018	44457846	20829	2	10626	ENSBTAG00000004862	TUB	TUB bipartite transcription factor
chr15	45095302	45096400	diffreps_chr15_45095301_45096400	1.15	0	0	Distal Intergenic	15	45220565	45250906	30342	2	154506	ENSBTAG00000021483	OLFML1	olfactomedin like 1
chr15	45150682	45151040	diffreps_chr15_45150681_45151040	1.1	5.8e-05	0.000437714	Distal Intergenic	15	45220565	45250906	30342	2	99866	ENSBTAG00000021483	OLFML1	olfactomedin like 1
chr15	46677062	46677360	diffreps_chr15_46677061_46677360	3.12	2.86e-13	8.93e-12	Distal Intergenic	15	46653532	46653606	75	1	23530	ENSBTAG00000044799	MIR2316	microRNA mir-2316
chr15	46784662	46784960	diffreps_chr15_46784661_46784960	4.26	2.22e-16	9.84e-15	Distal Intergenic	15	46765406	46776249	10844	2	-8413	ENSBTAG00000005236	CCKBR	cholecystokinin B receptor
chr15	51222382	51222780	diffreps_chr15_51222381_51222780	1.15	7.42e-07	8.21e-06	Distal Intergenic	15	51012849	51216626	203778	2	-5756	ENSBTAG00000013109	STIM1	stromal interaction molecule 1
chr15	51538662	51539220	diffreps_chr15_51538661_51539220	1.73	2.89e-13	9.01e-12	Exon (NM_174477/282101, exon 6 of 23)	15	51545546	51545617	72	2	6397	ENSBTAG00000044509	MIR2317	microRNA mir-2317
chr15	51654162	51654500	diffreps_chr15_51654161_51654500	2.5	2.65e-12	7.17e-11	Exon (NM_001205746/513091, exon 14 of 28)	15	51642590	51678777	36188	2	24277	ENSBTAG00000018449	NUMA1	nuclear mitotic apparatus protein 1
chr15	52128782	52129180	diffreps_chr15_52128781_52129180	1.16	7.24e-07	8.02e-06	Downstream (2-3kb)	15	52174693	52174760	68	2	45580	ENSBTAG00000029859	MIR139	microRNA mir-139
chr15	52141322	52141820	diffreps_chr15_52141321_52141820	1.38	9.09e-11	1.96e-09	Exon (NM_001256273/281971, exon 14 of 31)	15	52174693	52174760	68	2	32940	ENSBTAG00000029859	MIR139	microRNA mir-139
chr15	52157302	52159160	diffreps_chr15_52157301_52159160	1.23	0	0	Intron (NM_001256273/281971, intron 4 of 30)	15	52174693	52174760	68	2	15600	ENSBTAG00000029859	MIR139	microRNA mir-139
chr15	52237942	52238840	diffreps_chr15_52237941_52238840	1.91	0	0	Distal Intergenic	15	52131844	52228534	96691	2	-9408	ENSBTAG00000008419	PDE2A	phosphodiesterase 2A
chr15	52274942	52276620	diffreps_chr15_52274941_52276620	1.55	0	0	Distal Intergenic	15	52131844	52228534	96691	2	-46408	ENSBTAG00000008419	PDE2A	phosphodiesterase 2A
chr15	52335902	52336140	diffreps_chr15_52335901_52336140	1.1	0.000499501	0.00298436	Distal Intergenic	15	52302299	52329988	27690	2	-5914	ENSBTAG00000015182	STARD10	StAR related lipid transfer domain containing 10
chr15	52667262	52667700	diffreps_chr15_52667261_52667700	1.61	4.41e-10	8.48e-09	Distal Intergenic	15	52718507	52725072	6566	1	-50807	ENSBTAG00000039050	P2RY2	purinergic receptor P2Y2
chr15	52732122	52732620	diffreps_chr15_52732121_52732620	3.43	0	0	Distal Intergenic	15	52718507	52725072	6566	1	13615	ENSBTAG00000039050	P2RY2	purinergic receptor P2Y2
chr15	52787342	52787760	diffreps_chr15_52787341_52787760	1.29	1.22e-08	1.87e-07	Intron (NM_001192295/539703, intron 2 of 3)	15	52784745	52790305	5561	1	2597	ENSBTAG00000038737	P2RY6	pyrimidinergic receptor P2Y6
chr15	52798322	52798700	diffreps_chr15_52798321_52798700	1.92	1.47e-10	3.06e-09	Promoter (<=1kb)	15	52798766	52856744	57979	1	-66	ENSBTAG00000012505	ARHGEF17	Rho guanine nucleotide exchange factor 17
chr15	52840922	52841220	diffreps_chr15_52840921_52841220	2.48	2.3e-11	5.4e-10	Intron (NM_001282586/540026, intron 2 of 20)	15	52798766	52856744	57979	1	42156	ENSBTAG00000012505	ARHGEF17	Rho guanine nucleotide exchange factor 17
chr15	53134822	53135540	diffreps_chr15_53134821_53135540	1.3	0	0	3' UTR	15	53122703	53136354	13652	1	12119	ENSBTAG00000009830	PLEKHB1	pleckstrin homology domain containing B1
chr15	53400582	53400980	diffreps_chr15_53400581_53400980	1.01	2.74e-06	2.73e-05	Intron (NM_001034536/520270, intron 3 of 7)	15	53393973	53406519	12547	1	6609	ENSBTAG00000003682	DNAJB13	DnaJ heat shock protein family (Hsp40) member B13
chr15	54426942	54427380	diffreps_chr15_54426941_54427380	1.28	1.28e-08	1.95e-07	3' UTR	15	54375514	54427960	52447	1	51428	ENSBTAG00000015596	SLCO2B1	solute carrier organic anion transporter family member 2B1
chr15	54462022	54462560	diffreps_chr15_54462021_54462560	1.55	2.91e-11	6.75e-10	Distal Intergenic	15	54537265	54537359	95	2	74799	ENSBTAG00000029833	MIR326	microRNA mir-326
chr15	54492442	54492760	diffreps_chr15_54492441_54492760	1.02	0.0001285	0.000893247	Intron (NM_174243/281637, intron 7 of 15)	15	54537265	54537359	95	2	44599	ENSBTAG00000029833	MIR326	microRNA mir-326
chr15	54493502	54493920	diffreps_chr15_54493501_54493920	2.72	0	0	Exon (NM_174243/281637, exon 7 of 16)	15	54537265	54537359	95	2	43439	ENSBTAG00000029833	MIR326	microRNA mir-326
chr15	54582202	54582580	diffreps_chr15_54582201_54582580	1.34	8.23e-07	9.04e-06	Distal Intergenic	15	54593637	54598582	4946	1	-11057	ENSBTAG00000005620	RPS3	ribosomal protein S3
chr15	54583782	54584200	diffreps_chr15_54583781_54584200	2.55	2.22e-16	9.84e-15	Distal Intergenic	15	54593637	54598582	4946	1	-9437	ENSBTAG00000005620	RPS3	ribosomal protein S3
chr15	54584502	54584840	diffreps_chr15_54584501_54584840	1.05	6.19e-05	0.00046439	Distal Intergenic	15	54593637	54598582	4946	1	-8797	ENSBTAG00000005620	RPS3	ribosomal protein S3
chr15	54629582	54630000	diffreps_chr15_54629581_54630000	1.11	5.07e-08	6.96e-07	Intron (NM_001101141/532719, intron 10 of 18)	15	54604155	54610635	6481	2	-18947	ENSBTAG00000015087	KLHL35	kelch like family member 35
chr15	54631982	54632740	diffreps_chr15_54631981_54632740	2.36	0	0	Intron (NM_001101141/532719, intron 10 of 18)	15	54604155	54610635	6481	2	-21347	ENSBTAG00000015087	KLHL35	kelch like family member 35
chr15	54713222	54713440	diffreps_chr15_54713221_54713440	2.67	8.4e-09	1.33e-07	Distal Intergenic	15	54615543	54706361	90819	2	-6861	ENSBTAG00000031777	GDPD5	glycerophosphodiester phosphodiesterase domain containing 5
chr15	54713882	54714520	diffreps_chr15_54713881_54714520	1.1	5.17e-11	1.15e-09	Distal Intergenic	15	54615543	54706361	90819	2	-7521	ENSBTAG00000031777	GDPD5	glycerophosphodiester phosphodiesterase domain containing 5
chr15	54722162	54722560	diffreps_chr15_54722161_54722560	1.2	2.17e-07	2.66e-06	Distal Intergenic	15	54738171	54748403	10233	1	-15611	ENSBTAG00000001027	SERPINH1	serpin family H member 1
chr15	55623902	55624340	diffreps_chr15_55623901_55624340	1.5	4.19e-09	6.99e-08	Promoter (<=1kb)	15	55605313	55624948	19636	2	608	ENSBTAG00000010820	WNT11	Wnt family member 11
chr15	55624402	55624980	diffreps_chr15_55624401_55624980	1.05	1.2e-10	2.52e-09	Promoter (<=1kb)	15	55605313	55624948	19636	2	0	ENSBTAG00000010820	WNT11	Wnt family member 11
chr15	55730682	55731280	diffreps_chr15_55730681_55731280	1.03	1.61e-11	3.88e-10	Distal Intergenic	15	55762482	55791234	28753	2	59954	ENSBTAG00000031609	THAP12	THAP domain containing 12
chr15	56069762	56071140	diffreps_chr15_56069761_56071140	1.2	0	0	Distal Intergenic	15	56045705	56052803	7099	2	-16959	ENSBTAG00000001301	LRRC32	leucine rich repeat containing 32
chr15	56508402	56508760	diffreps_chr15_56508401_56508760	1.44	2.54e-07	3.07e-06	Intron (NM_001192894/536988, intron 4 of 13)	15	56473004	56530219	57216	1	35398	ENSBTAG00000005034	CAPN5	calpain 5
chr15	64429842	64430080	diffreps_chr15_64429841_64430080	2.17	2.45e-07	2.98e-06	Distal Intergenic	15	64374736	64408040	33305	2	-21802	ENSBTAG00000010071	FBXO3	F-box protein 3
chr15	64611422	64611640	diffreps_chr15_64611421_64611640	1.24	0.000402167	0.00245912	Distal Intergenic	15	64661669	64697025	35357	1	-50029	ENSBTAG00000016744	CAPRIN1	cell cycle associated protein 1
chr15	65008262	65008620	diffreps_chr15_65008261_65008620	1.02	6.33e-05	0.000473801	Intron (NM_001035386/531682, intron 11 of 12)	15	64975290	65011234	35945	1	32972	ENSBTAG00000020980	CAT	catalase
chr15	65746382	65746780	diffreps_chr15_65746381_65746780	2.14	9.45e-13	2.73e-11	Distal Intergenic	15	65649552	65737464	87913	1	96830	ENSBTAG00000011578	CD44	CD44 molecule
chr15	65928442	65928940	diffreps_chr15_65928441_65928940	1.23	1.94e-09	3.37e-08	Distal Intergenic	15	65950555	66028064	77510	2	99124	ENSBTAG00000012630	PAMR1	peptidase domain containing associated with muscle regeneration 1
chr15	66587542	66587840	diffreps_chr15_66587541_66587840	2.15	6.23e-09	1.01e-07	Intron (NM_001192619/525908, intron 4 of 5)	15	66431232	66700372	269141	1	156310	ENSBTAG00000044158	LDLRAD3	low density lipoprotein receptor class A domain containing 3
chr15	73423582	73424000	diffreps_chr15_73423581_73424000	1.11	2.34e-06	2.36e-05	Promoter (<=1kb)	15	73423823	73450600	26778	1	0	ENSBTAG00000014474	API5	apoptosis inhibitor 5
chr15	74396782	74397380	diffreps_chr15_74396781_74397380	1.4	7.88e-15	2.96e-13	Intron (NM_001030304/594846, intron 1 of 3)	15	74373004	74417594	44591	2	20214	ENSBTAG00000027563	ALX4	ALX homeobox 4
chr15	74536362	74536680	diffreps_chr15_74536361_74536680	3.44	8.88e-16	3.74e-14	Distal Intergenic	15	74643391	74699201	55811	1	-106711	ENSBTAG00000031252	CD82	CD82 molecule
chr15	74601402	74602060	diffreps_chr15_74601401_74602060	1.28	3.73e-13	1.14e-11	Distal Intergenic	15	74643391	74699201	55811	1	-41331	ENSBTAG00000031252	CD82	CD82 molecule
chr15	74624862	74625240	diffreps_chr15_74624861_74625240	1.08	2.07e-05	0.000172729	Distal Intergenic	15	74643391	74699201	55811	1	-18151	ENSBTAG00000031252	CD82	CD82 molecule
chr15	74625262	74626740	diffreps_chr15_74625261_74626740	1.23	0	0	Distal Intergenic	15	74643391	74699201	55811	1	-16651	ENSBTAG00000031252	CD82	CD82 molecule
chr15	74636142	74636620	diffreps_chr15_74636141_74636620	1.31	2.68e-09	4.58e-08	Distal Intergenic	15	74643391	74699201	55811	1	-6771	ENSBTAG00000031252	CD82	CD82 molecule
chr15	74698982	74699240	diffreps_chr15_74698981_74699240	3.23	1.04e-11	2.57e-10	3' UTR	15	74643391	74699201	55811	1	55591	ENSBTAG00000031252	CD82	CD82 molecule
chr15	74699582	74699940	diffreps_chr15_74699581_74699940	1.42	5.94e-07	6.69e-06	Distal Intergenic	15	74643391	74699201	55811	1	56191	ENSBTAG00000031252	CD82	CD82 molecule
chr15	74700802	74701100	diffreps_chr15_74700801_74701100	2.38	2.89e-10	5.73e-09	Distal Intergenic	15	74643391	74699201	55811	1	57411	ENSBTAG00000031252	CD82	CD82 molecule
chr15	74971362	74972640	diffreps_chr15_74971361_74972640	1.19	0	0	Exon (NM_001080920/783765, exon 4 of 10)	15	75004237	75021831	17595	2	49191	ENSBTAG00000017228	TP53I11	tumor protein p53 inducible protein 11
chr15	74997942	74999180	diffreps_chr15_74997941_74999180	1.5	0	0	Exon (NM_001080920/783765, exon 8 of 10)	15	75004237	75021831	17595	2	22651	ENSBTAG00000017228	TP53I11	tumor protein p53 inducible protein 11
chr15	75007882	75008220	diffreps_chr15_75007881_75008220	1.6	2.82e-07	3.39e-06	Exon (NM_001075725/515682, exon 5 of 8)	15	75004237	75021831	17595	2	13611	ENSBTAG00000017228	TP53I11	tumor protein p53 inducible protein 11
chr15	75165602	75166400	diffreps_chr15_75165601_75166400	1.14	2.95e-14	1.03e-12	Distal Intergenic	15	75004237	75021831	17595	2	-143771	ENSBTAG00000017228	TP53I11	tumor protein p53 inducible protein 11
chr15	75166662	75167500	diffreps_chr15_75166661_75167500	2.31	0	0	Distal Intergenic	15	75004237	75021831	17595	2	-144831	ENSBTAG00000017228	TP53I11	tumor protein p53 inducible protein 11
chr15	75237562	75237980	diffreps_chr15_75237561_75237980	1.14	6.48e-08	8.72e-07	Distal Intergenic	15	75297582	75339698	42117	2	101718	ENSBTAG00000001703	SYT13	synaptotagmin 13
chr15	75821442	75822500	diffreps_chr15_75821441_75822500	1.06	0	0	Distal Intergenic	15	75853342	75860292	6951	1	-30842	ENSBTAG00000003199	SLC35C1	solute carrier family 35 member C1
chr15	75904982	75905180	diffreps_chr15_75904981_75905180	3.48	8.45e-11	1.83e-09	Intron (NM_001289786/509058, intron 10 of 11)	15	75918828	75938170	19343	1	-13648	ENSBTAG00000000317	MAPK8IP1	mitogen-activated protein kinase 8 interacting protein 1
chr15	75905522	75905860	diffreps_chr15_75905521_75905860	3.36	2.22e-16	9.84e-15	3' UTR	15	75918828	75938170	19343	1	-12968	ENSBTAG00000000317	MAPK8IP1	mitogen-activated protein kinase 8 interacting protein 1
chr15	75962222	75962760	diffreps_chr15_75962221_75962760	1.08	6.91e-09	1.11e-07	Intron (NM_001206197/510395, intron 15 of 15)	15	75951351	75956775	5425	1	10871	ENSBTAG00000009607	LARGE2	LARGE xylosyl- and glucuronyltransferase 2
chr15	76247502	76248260	diffreps_chr15_76247501_76248260	1.21	2.22e-16	9.84e-15	Distal Intergenic	15	76283432	76319470	36039	1	-35172	ENSBTAG00000006143	CREB3L1	cAMP responsive element binding protein 3 like 1
chr15	76248542	76248880	diffreps_chr15_76248541_76248880	2.87	1.09e-13	3.54e-12	Distal Intergenic	15	76283432	76319470	36039	1	-34552	ENSBTAG00000006143	CREB3L1	cAMP responsive element binding protein 3 like 1
chr15	76314002	76314640	diffreps_chr15_76314001_76314640	1.29	2.84e-14	9.99e-13	Intron (NM_001192341/513105, intron 8 of 11)	15	76343896	76374697	30802	1	-29256	ENSBTAG00000013636	DGKZ	diacylglycerol kinase zeta
chr15	76362482	76363980	diffreps_chr15_76362481_76363980	1.03	0	0	Exon (NM_001278652/511887, exon 2 of 32)	15	76375930	76377899	1970	1	-11950	ENSBTAG00000007740	MDK	midkine
chr15	76371982	76372660	diffreps_chr15_76371981_76372660	1.07	2.88e-11	6.68e-10	Exon (NM_001278652/511887, exon 26 of 32)	15	76375930	76377899	1970	1	-3270	ENSBTAG00000007740	MDK	midkine
chr15	76384082	76384480	diffreps_chr15_76384081_76384480	1.06	1.49e-05	0.000129039	Distal Intergenic	15	76377890	76380011	2122	2	-4071	ENSBTAG00000033699	CHRM4	cholinergic receptor muscarinic 4
chr15	76816762	76817360	diffreps_chr15_76816761_76817360	1.33	4.82e-12	1.26e-10	Exon (NM_001077843/504317, exon 14 of 38)	15	76789246	76840613	51368	2	23253	ENSBTAG00000008429	LRP4	LDL receptor related protein 4
chr15	77053182	77053560	diffreps_chr15_77053181_77053560	1.65	1.98e-08	2.93e-07	Intron (NM_001038037/505437, intron 4 of 8)	15	77064071	77073668	9598	2	20108	ENSBTAG00000009574	ARFGAP2	ADP ribosylation factor GTPase activating protein 2
chr15	77059902	77060280	diffreps_chr15_77059901_77060280	1.27	4.45e-06	4.26e-05	Intron (NM_001038037/505437, intron 7 of 8)	15	77064071	77073668	9598	2	13388	ENSBTAG00000009574	ARFGAP2	ADP ribosylation factor GTPase activating protein 2
chr15	77061362	77061660	diffreps_chr15_77061361_77061660	2.69	2.65e-12	7.16e-11	Intron (NM_001038037/505437, intron 8 of 8)	15	77064071	77073668	9598	2	12008	ENSBTAG00000009574	ARFGAP2	ADP ribosylation factor GTPase activating protein 2
chr15	77133002	77133200	diffreps_chr15_77133001_77133200	1.31	0.000518548	0.00308334	Promoter (1-2kb)	15	77131490	77138639	7150	1	1512	ENSBTAG00000010681	NR1H3	nuclear receptor subfamily 1 group H member 3
chr15	77179802	77180480	diffreps_chr15_77179801_77180480	3.76	0	0	3' UTR	15	77181629	77199362	17734	2	18882	ENSBTAG00000021707	MYBPC3	myosin binding protein C3
chr15	77212382	77213420	diffreps_chr15_77212381_77213420	1.19	0	0	Intron (NM_001192133/507100, intron 2 of 4)	15	77200851	77217718	16868	2	4298	ENSBTAG00000021709	SPI1	Spi-1 proto-oncogene
chr15	77213582	77214140	diffreps_chr15_77213581_77214140	3.08	0	0	Intron (NM_001192133/507100, intron 2 of 4)	15	77200851	77217718	16868	2	3578	ENSBTAG00000021709	SPI1	Spi-1 proto-oncogene
chr15	77239322	77239580	diffreps_chr15_77239321_77239580	1.39	6.38e-05	0.00047699	Promoter (<=1kb)	15	77240258	77248528	8271	1	-678	ENSBTAG00000019436	SLC39A13	solute carrier family 39 member 13
chr15	77244182	77245120	diffreps_chr15_77244181_77245120	1.03	0	0	Exon (NM_001098132/614946, exon 3 of 9)	15	77240258	77248528	8271	1	3924	ENSBTAG00000019436	SLC39A13	solute carrier family 39 member 13
chr15	77291102	77291700	diffreps_chr15_77291101_77291700	1.09	5.41e-11	1.2e-09	Intron (NM_001101212/540475, intron 13 of 13)	15	77261077	77273369	12293	2	-17733	ENSBTAG00000021745	RAPSN	receptor associated protein of the synapse
chr15	77590722	77591040	diffreps_chr15_77590721_77591040	1.19	2.38e-05	0.000196018	Distal Intergenic	15	77526746	77570322	43577	2	-20400	ENSBTAG00000021125	NUP160	nucleoporin 160
chr15	77870822	77871240	diffreps_chr15_77870821_77871240	1.03	9.53e-07	1.03e-05	Distal Intergenic	15	77950829	77951758	930	1	-79589	ENSBTAG00000031026	OR4X5	olfactory receptor family 4 subfamily X member 5
chr15	80717422	80717900	diffreps_chr15_80717421_80717900	1.34	1.85e-11	4.4e-10	Distal Intergenic	15	80673387	80692457	19071	2	-24965	ENSBTAG00000010060	SLC43A3	solute carrier family 43 member 3
chr15	80719642	80720080	diffreps_chr15_80719641_80720080	1.62	9.44e-10	1.73e-08	Distal Intergenic	15	80673387	80692457	19071	2	-27185	ENSBTAG00000010060	SLC43A3	solute carrier family 43 member 3
chr15	80786502	80787760	diffreps_chr15_80786501_80787760	1.82	0	0	Downstream (<1kb)	15	80788219	80790815	2597	2	3055	ENSBTAG00000024701	TIMM10	translocase of inner mitochondrial membrane 10
chr15	80888042	80888640	diffreps_chr15_80888041_80888640	1.41	8.88e-13	2.57e-11	Promoter (<=1kb)	15	80888253	80888341	89	1	0	ENSBTAG00000030122	MIR130A	microRNA mir-130a
chr15	81939702	81940140	diffreps_chr15_81939701_81940140	1.01	5.5e-06	5.17e-05	Distal Intergenic	15	81845565	81887132	41568	2	-52570	ENSBTAG00000036260	LPXN	leupaxin
chr16	1123142	1123940	diffreps_chr16_1123141_1123940	2.03	0	0	3' UTR	16	1122158	1132168	10011	2	8228	ENSBTAG00000014912	FMOD	fibromodulin
chr16	1907022	1907400	diffreps_chr16_1907021_1907400	1.16	7.24e-07	8.02e-06	Distal Intergenic	16	1936118	1946132	10015	2	38732	ENSBTAG00000021333	REN	renin
chr16	1913982	1914740	diffreps_chr16_1913981_1914740	1.23	0	0	Distal Intergenic	16	1936118	1946132	10015	2	31392	ENSBTAG00000021333	REN	renin
chr16	1942402	1943100	diffreps_chr16_1942401_1943100	1.05	7.81e-12	1.97e-10	Exon (NM_001206509/280909, exon 2 of 9)	16	1936118	1946132	10015	2	3032	ENSBTAG00000021333	REN	renin
chr16	2196582	2197280	diffreps_chr16_2196581_2197280	1.02	2.56e-10	5.11e-09	Distal Intergenic	16	2255641	2292887	37247	1	-58361	ENSBTAG00000006255	MDM4	MDM4 regulator of p53
chr16	2197422	2197820	diffreps_chr16_2197421_2197820	2.2	3.96e-13	1.21e-11	Distal Intergenic	16	2255641	2292887	37247	1	-57821	ENSBTAG00000006255	MDM4	MDM4 regulator of p53
chr16	2567462	2567660	diffreps_chr16_2567461_2567660	1.52	6.81e-05	0.000505341	Distal Intergenic	16	2358404	2361430	3027	2	-206032	NA	LRRN2	leucine rich repeat neuronal 2
chr16	26578322	26578680	diffreps_chr16_26578321_26578680	1.14	1.87e-05	0.000157386	Distal Intergenic	16	26601166	26603747	2582	2	25067	ENSBTAG00000000477	TLR5	toll like receptor 5
chr16	27114702	27115040	diffreps_chr16_27114701_27115040	1.64	4.8e-08	6.61e-07	Intron (NM_001103086/281662, intron 5 of 20)	16	27080007	27138329	58323	1	34695	ENSBTAG00000012778	CAPN2	calpain 2
chr16	27614922	27615380	diffreps_chr16_27614921_27615380	1.65	3.46e-10	6.78e-09	Distal Intergenic	16	27556058	27589474	33417	2	-25448	ENSBTAG00000011785	WDR26	WD repeat domain 26
chr16	2773002	2775120	diffreps_chr16_2773001_2775120	1.1	0	0	Distal Intergenic	16	2861873	2864024	2152	2	88904	ENSBTAG00000015945	TMEM81	transmembrane protein 81
chr16	2847502	2848080	diffreps_chr16_2847501_2848080	1.06	2.88e-08	4.13e-07	Distal Intergenic	16	2861873	2864024	2152	2	15944	ENSBTAG00000015945	TMEM81	transmembrane protein 81
chr16	28870442	28871200	diffreps_chr16_28870441_28871200	1.2	0	0	3' UTR	16	28871491	28902208	30718	2	31008	ENSBTAG00000002854	TMEM63A	transmembrane protein 63A
chr16	29136582	29136940	diffreps_chr16_29136581_29136940	1.48	3.17e-07	3.76e-06	Distal Intergenic	16	29079663	29087863	8201	1	56919	ENSBTAG00000024561	H3-3A	H3.3 histone A
chr16	29641062	29643120	diffreps_chr16_29641061_29643120	1.07	0	0	Distal Intergenic	16	29550028	29612426	62399	1	91034	ENSBTAG00000024560	STUM	stum, mechanosensory transduction mediator homolog
chr16	3032222	3032940	diffreps_chr16_3032221_3032940	2.2	0	0	Intron (NM_001077135/768080, intron 2 of 4)	16	3006671	3044515	37845	1	25551	ENSBTAG00000002361	TMCC2	transmembrane and coiled-coil domain family 2
chr16	3044022	3046180	diffreps_chr16_3044021_3046180	1.16	0	0	3' UTR	16	3006671	3044515	37845	1	37351	ENSBTAG00000002361	TMCC2	transmembrane and coiled-coil domain family 2
chr16	3087742	3088400	diffreps_chr16_3087741_3088400	1.06	5.84e-11	1.29e-09	Distal Intergenic	16	3100151	3105604	5454	2	17204	ENSBTAG00000015197	KLHDC8A	kelch domain containing 8A
chr16	3232602	3233820	diffreps_chr16_3232601_3233820	1.3	0	0	Distal Intergenic	16	3265670	3275157	9488	1	-31850	ENSBTAG00000012673	CDK18	cyclin dependent kinase 18
chr16	36325822	36326200	diffreps_chr16_36325821_36326200	1.06	6.12e-05	0.000460315	Intron (NM_001045903/504963, intron 1 of 3)	16	36297417	36333818	36402	2	7618	ENSBTAG00000021211	DPT	dermatopontin
chr16	3646282	3646840	diffreps_chr16_3646281_3646840	1.06	1.16e-10	2.45e-09	Distal Intergenic	16	3602535	3627613	25079	2	-18669	ENSBTAG00000008734	PM20D1	peptidase M20 domain containing 1
chr16	3729102	3729480	diffreps_chr16_3729101_3729480	1.79	2.68e-09	4.59e-08	3' UTR	16	3729000	3757260	28261	2	27780	ENSBTAG00000012774	RAB7B	RAB7B, member RAS oncogene family
chr16	3729822	3730460	diffreps_chr16_3729821_3730460	2.79	0	0	3' UTR	16	3729000	3757260	28261	2	26800	ENSBTAG00000012774	RAB7B	RAB7B, member RAS oncogene family
chr16	41107542	41108280	diffreps_chr16_41107541_41108280	1.07	3.38e-13	1.04e-11	Promoter (1-2kb)	16	41110223	41160245	50023	1	-1943	ENSBTAG00000024493	DHRS3	dehydrogenase/reductase 3
chr16	41438382	41438880	diffreps_chr16_41438381_41438880	1.26	6.85e-09	1.1e-07	Exon (NM_001192767/540683, exon 18 of 68)	16	41205339	41473842	268504	2	34962	ENSBTAG00000016080	VPS13D	vacuolar protein sorting 13 homolog D
chr16	41498902	41499740	diffreps_chr16_41498901_41499740	1.56	0	0	Downstream (<1kb)	16	41205339	41473842	268504	2	-25060	ENSBTAG00000016080	VPS13D	vacuolar protein sorting 13 homolog D
chr16	41580922	41581800	diffreps_chr16_41580921_41581800	1.3	0	0	Distal Intergenic	16	41500621	41534184	33564	2	-46738	ENSBTAG00000024928	TNFRSF1B	TNF receptor superfamily member 1B
chr16	41599482	41599980	diffreps_chr16_41599481_41599980	1.08	8.77e-10	1.61e-08	Distal Intergenic	16	41500621	41534184	33564	2	-65298	ENSBTAG00000024928	TNFRSF1B	TNF receptor superfamily member 1B
chr16	41694142	41694460	diffreps_chr16_41694141_41694460	1.07	6.05e-05	0.000455685	Exon (NM_001190269/534574, exon 11 of 20)	16	41684093	41711310	27218	2	16850	ENSBTAG00000005314	MFN2	mitofusin 2
chr16	41779202	41779500	diffreps_chr16_41779201_41779500	1.94	4.07e-08	5.68e-07	Distal Intergenic	16	41753807	41759434	5628	1	25395	ENSBTAG00000019388	KIAA2013	KIAA2013 ortholog
chr16	41891242	41893040	diffreps_chr16_41891241_41893040	1.1	0	0	Distal Intergenic	16	41878277	41878336	60	1	12965	NA	MIR12050	microRNA mir-12050
chr16	42408042	42408480	diffreps_chr16_42408041_42408480	1.23	4.67e-08	6.44e-07	Distal Intergenic	16	42447039	42453123	6085	2	44643	ENSBTAG00000015340	ANGPTL7	angiopoietin like 7
chr16	42653442	42654280	diffreps_chr16_42653441_42654280	1.53	0	0	Distal Intergenic	16	42600249	42605333	5085	2	-48109	ENSBTAG00000003697	TARDBP	TAR DNA binding protein
chr16	42671482	42671740	diffreps_chr16_42671481_42671740	1.21	3.26e-05	0.000260418	Distal Intergenic	16	42600249	42605333	5085	2	-66149	ENSBTAG00000003697	TARDBP	TAR DNA binding protein
chr16	42672442	42673100	diffreps_chr16_42672441_42673100	2.79	0	0	Distal Intergenic	16	42600249	42605333	5085	2	-67109	ENSBTAG00000003697	TARDBP	TAR DNA binding protein
chr16	42701562	42701820	diffreps_chr16_42701561_42701820	2.4	3.26e-09	5.51e-08	Distal Intergenic	16	42600249	42605333	5085	2	-96229	ENSBTAG00000003697	TARDBP	TAR DNA binding protein
chr16	43154402	43154660	diffreps_chr16_43154401_43154660	1.73	1.29e-06	1.37e-05	Distal Intergenic	16	43134173	43148824	14652	2	-5578	ENSBTAG00000013531	CENPS	apoptosis-inducing, TAF9-like domain 1
chr16	4328882	4329360	diffreps_chr16_4328881_4329360	1.07	2.22e-07	2.72e-06	Intron (NM_001113760/539767, intron 2 of 5)	16	4293882	4367202	73321	1	35000	ENSBTAG00000010427	RASSF5	Ras association domain family member 5
chr16	4361762	4362100	diffreps_chr16_4361761_4362100	2.53	1.4e-12	3.93e-11	Exon (NM_001113760/539767, exon 4 of 6)	16	4369660	4391074	21415	2	28974	ENSBTAG00000010432	EIF2D	eukaryotic translation initiation factor 2D
chr16	43654362	43655020	diffreps_chr16_43654361_43655020	1.02	3.33e-16	1.47e-14	Promoter (1-2kb)	16	43656664	43675140	18477	1	-1644	ENSBTAG00000005933	CTNNBIP1	catenin beta interacting protein 1
chr16	43664302	43666980	diffreps_chr16_43664301_43666980	1.64	0	0	Intron (NM_001037142/614630, intron 3 of 3)	16	43656664	43675140	18477	1	7638	ENSBTAG00000005933	CTNNBIP1	catenin beta interacting protein 1
chr16	43740062	43740440	diffreps_chr16_43740061_43740440	2.11	4.68e-11	1.05e-09	Distal Intergenic	16	43789100	43802652	13553	2	62212	ENSBTAG00000018984	PIK3CD	phosphatidylinositol-4,5-bisphosphate 3-kinase catalytic subunit delta
chr16	43898642	43899620	diffreps_chr16_43898641_43899620	1.57	0	0	3' UTR	16	43898068	43911995	13928	2	12375	ENSBTAG00000003180	TMEM201	transmembrane protein 201
chr16	43985202	43986720	diffreps_chr16_43985201_43986720	1.13	0	0	Distal Intergenic	16	43898068	43911995	13928	2	-73207	ENSBTAG00000003180	TMEM201	transmembrane protein 201
chr16	44025602	44026040	diffreps_chr16_44025601_44026040	2.46	4.88e-15	1.89e-13	Distal Intergenic	16	44108087	44119779	11693	2	93739	ENSBTAG00000004246	SPSB1	splA/ryanodine receptor domain and SOCS box containing 1
chr16	44258022	44258260	diffreps_chr16_44258021_44258260	1.04	0.00107979	0.00585901	Distal Intergenic	16	44308925	44309031	107	1	-50665	ENSBTAG00000029924	MIR34A	microRNA mir-34a
chr16	44274962	44275460	diffreps_chr16_44274961_44275460	1.31	9.87e-11	2.11e-09	Distal Intergenic	16	44308925	44309031	107	1	-33465	ENSBTAG00000029924	MIR34A	microRNA mir-34a
chr16	44347662	44348540	diffreps_chr16_44347661_44348540	1.54	0	0	Distal Intergenic	16	44379763	44407094	27332	1	-31223	ENSBTAG00000007302	SLC2A5	solute carrier family 2 (facilitated glucose/fructose transporter), member 5
chr16	44438302	44438840	diffreps_chr16_44438301_44438840	1.82	7.33e-15	2.76e-13	Downstream (1-2kb)	16	44440383	44465148	24766	2	26308	ENSBTAG00000009515	CA6	carbonic anhydrase 6
chr16	4445082	4445720	diffreps_chr16_4445081_4445720	1.02	2.44e-15	9.79e-14	Distal Intergenic	16	4423704	4433850	10147	1	21378	ENSBTAG00000013294	DYRK3	dual specificity tyrosine phosphorylation regulated kinase 3
chr16	45031882	45033400	diffreps_chr16_45031881_45033400	2.56	0	0	Downstream (2-3kb)	16	45035441	45057564	22124	2	24164	ENSBTAG00000001401	SLC45A1	solute carrier family 45 member 1
chr16	45033442	45035200	diffreps_chr16_45033441_45035200	1.2	0	0	Downstream (<1kb)	16	45035441	45057564	22124	2	22364	ENSBTAG00000001401	SLC45A1	solute carrier family 45 member 1
chr16	45062162	45062380	diffreps_chr16_45062161_45062380	1.87	2.83e-06	2.81e-05	Distal Intergenic	16	45035441	45057564	22124	2	-4598	ENSBTAG00000001401	SLC45A1	solute carrier family 45 member 1
chr16	4507962	4508320	diffreps_chr16_4507961_4508320	2.98	3.55e-15	1.39e-13	Distal Intergenic	16	4551373	4555309	3937	2	46989	ENSBTAG00000006685	IL10	interleukin 10
chr16	4509242	4509900	diffreps_chr16_4509241_4509900	1.04	6.81e-14	2.27e-12	Distal Intergenic	16	4551373	4555309	3937	2	45409	ENSBTAG00000006685	IL10	interleukin 10
chr16	45363462	45363720	diffreps_chr16_45363461_45363720	2.7	1.06e-10	2.26e-09	Intron (NM_001077930/516303, intron 3 of 3)	16	45352249	45366512	14264	1	11213	ENSBTAG00000006609	ERRFI1	ERBB receptor feedback inhibitor 1
chr16	45710622	45711060	diffreps_chr16_45710621_45711060	1.44	8.6e-10	1.58e-08	Distal Intergenic	16	45607169	45616702	9534	2	-93920	NA	VAMP3	vesicle associated membrane protein 3
chr16	45711882	45712260	diffreps_chr16_45711881_45712260	3.92	0	0	Distal Intergenic	16	45607169	45616702	9534	2	-95180	NA	VAMP3	vesicle associated membrane protein 3
chr16	4591082	4591660	diffreps_chr16_4591081_4591660	1.75	1.4e-14	5.09e-13	Distal Intergenic	16	4551373	4555309	3937	2	-35773	ENSBTAG00000006685	IL10	interleukin 10
chr16	46926742	46927260	diffreps_chr16_46926741_46927260	1.17	2.17e-10	4.38e-09	Distal Intergenic	16	46905098	46909415	4318	1	21644	ENSBTAG00000006519	TNFRSF25	TNF receptor superfamily member 25
chr16	46929222	46929600	diffreps_chr16_46929221_46929600	1.25	3.31e-06	3.25e-05	Distal Intergenic	16	46950102	46952594	2493	1	-20502	ENSBTAG00000021210	HES2	hes family bHLH transcription factor 2
chr16	4697102	4697820	diffreps_chr16_4697101_4697820	1.32	5.22e-15	2.01e-13	Distal Intergenic	16	4713347	4730901	17555	2	33081	ENSBTAG00000019798	PIGR	polymeric immunoglobulin receptor
chr16	47030602	47031760	diffreps_chr16_47030601_47031760	1.17	0	0	Intron (NM_001075682/514788, intron 2 of 8)	16	46979218	47087020	107803	1	51384	ENSBTAG00000021202	ACOT7	acyl-CoA thioesterase 7
chr16	47039742	47040260	diffreps_chr16_47039741_47040260	2.82	0	0	Intron (NM_001075682/514788, intron 3 of 8)	16	46979218	47087020	107803	1	60524	ENSBTAG00000021202	ACOT7	acyl-CoA thioesterase 7
chr16	47076742	47077320	diffreps_chr16_47076741_47077320	1.49	6.42e-13	1.9e-11	Intron (NM_001075682/514788, intron 8 of 8)	16	47120163	47137137	16975	2	59817	ENSBTAG00000009075	RNF207	ring finger protein 207
chr16	47099582	47100980	diffreps_chr16_47099581_47100980	1.69	0	0	Distal Intergenic	16	47120163	47137137	16975	2	36157	ENSBTAG00000009075	RNF207	ring finger protein 207
chr16	47102482	47103220	diffreps_chr16_47102481_47103220	1.23	2.24e-14	8e-13	Distal Intergenic	16	47120163	47137137	16975	2	33917	ENSBTAG00000009075	RNF207	ring finger protein 207
chr16	47343062	47343360	diffreps_chr16_47343061_47343360	1.16	7.41e-05	0.00054625	Distal Intergenic	16	47231900	47287875	55976	2	-55187	ENSBTAG00000008125	KCNAB2	potassium voltage-gated channel subfamily A regulatory beta subunit 2
chr16	49335182	49336120	diffreps_chr16_49335181_49336120	1.47	0	0	Distal Intergenic	16	49286551	49290320	3770	2	-44862	ENSBTAG00000045754	SMIM1	small integral membrane protein 1 (Vel blood group)
chr16	49336182	49337340	diffreps_chr16_49336181_49337340	1.33	0	0	Distal Intergenic	16	49286551	49290320	3770	2	-45862	ENSBTAG00000045754	SMIM1	small integral membrane protein 1 (Vel blood group)
chr16	49426042	49426780	diffreps_chr16_49426041_49426780	1.08	3.51e-12	9.35e-11	Distal Intergenic	16	49419778	49422661	2884	2	-3381	ENSBTAG00000015857	TPRG1L	tumor protein p63 regulated 1 like
chr16	49427642	49428960	diffreps_chr16_49427641_49428960	1.12	0	0	Distal Intergenic	16	49419778	49422661	2884	2	-4981	ENSBTAG00000015857	TPRG1L	tumor protein p63 regulated 1 like
chr16	49468462	49470640	diffreps_chr16_49468461_49470640	1.37	0	0	Distal Intergenic	16	49472683	49472776	94	1	-2043	ENSBTAG00000030099	MIR551A	microRNA mir-551a
chr16	49534102	49536780	diffreps_chr16_49534101_49536780	1.45	0	0	Distal Intergenic	16	49542330	49555642	13313	2	18862	ENSBTAG00000020837	ARHGEF16	Rho guanine nucleotide exchange factor 16
chr16	49589662	49590060	diffreps_chr16_49589661_49590060	1.23	6.8e-08	9.14e-07	Distal Intergenic	16	49542330	49555642	13313	2	-34020	ENSBTAG00000020837	ARHGEF16	Rho guanine nucleotide exchange factor 16
chr16	49590702	49591040	diffreps_chr16_49590701_49591040	3.27	4e-15	1.55e-13	Distal Intergenic	16	49542330	49555642	13313	2	-35060	ENSBTAG00000020837	ARHGEF16	Rho guanine nucleotide exchange factor 16
chr16	50217582	50217980	diffreps_chr16_50217581_50217980	1.18	9.67e-07	1.05e-05	Distal Intergenic	16	50271751	50306501	34751	1	-53771	ENSBTAG00000009349	MMEL1	membrane metalloendopeptidase like 1
chr16	50323502	50323720	diffreps_chr16_50323501_50323720	1.17	0.000655876	0.00378782	Distal Intergenic	16	50307838	50310952	3115	2	-12550	ENSBTAG00000001727	PRXL2B	peroxiredoxin like 2B
chr16	50358842	50359440	diffreps_chr16_50358841_50359440	1.56	7.94e-14	2.63e-12	Distal Intergenic	16	50343133	50358697	15565	1	15709	ENSBTAG00000002479	PANK4	pantothenate kinase 4 (inactive)
chr16	50434482	50435040	diffreps_chr16_50434481_50435040	1.47	7.62e-13	2.23e-11	Distal Intergenic	16	50437189	50442749	5561	1	-2149	ENSBTAG00000009309	PEX10	peroxisomal biogenesis factor 10
chr16	50458742	50459640	diffreps_chr16_50458741_50459640	1.46	0	0	Distal Intergenic	16	50442763	50452801	10039	2	-5941	ENSBTAG00000009307	RER1	retention in endoplasmic reticulum sorting receptor 1
chr16	50704662	50705260	diffreps_chr16_50704661_50705260	1.23	2.31e-10	4.64e-09	Distal Intergenic	16	50600058	50699544	99487	2	-5118	ENSBTAG00000014119	PRKCZ	protein kinase C zeta
chr16	51071322	51071560	diffreps_chr16_51071321_51071560	3.45	2.37e-12	6.48e-11	Intron (NM_001076349/614837, intron 2 of 4)	16	51079298	51084984	5687	1	-7738	ENSBTAG00000046073	TMEM240	transmembrane protein 240
chr16	51152362	51153100	diffreps_chr16_51152361_51153100	1.28	0	0	Distal Intergenic	16	51147423	51151892	4470	1	4939	ENSBTAG00000004874	AURKAIP1	aurora kinase A interacting protein 1
chr16	51180222	51180720	diffreps_chr16_51180221_51180720	1.43	2e-09	3.47e-08	Promoter (<=1kb)	16	51180235	51192053	11819	1	0	ENSBTAG00000010696	DVL1	dishevelled segment polarity protein 1
chr16	51230862	51231500	diffreps_chr16_51230861_51231500	1.07	7.23e-12	1.83e-10	Distal Intergenic	16	51242889	51251061	8173	1	-11389	ENSBTAG00000015882	UBE2J2	ubiquitin conjugating enzyme E2 J2
chr16	51231542	51232380	diffreps_chr16_51231541_51232380	2.12	0	0	Distal Intergenic	16	51242889	51251061	8173	1	-10509	ENSBTAG00000015882	UBE2J2	ubiquitin conjugating enzyme E2 J2
chr16	51365422	51366820	diffreps_chr16_51365421_51366820	1.05	0	0	Distal Intergenic	16	51391794	51400873	9080	1	-24974	ENSBTAG00000014511	C16H1orf159	chromosome 16 C1orf159 homolog
chr16	51367122	51367600	diffreps_chr16_51367121_51367600	1.12	1.98e-07	2.45e-06	Distal Intergenic	16	51391794	51400873	9080	1	-24194	ENSBTAG00000014511	C16H1orf159	chromosome 16 C1orf159 homolog
chr16	51411722	51414240	diffreps_chr16_51411721_51414240	1.51	0	0	Distal Intergenic	16	51391794	51400873	9080	1	19928	ENSBTAG00000014511	C16H1orf159	chromosome 16 C1orf159 homolog
chr16	51444622	51446580	diffreps_chr16_51444621_51446580	1.34	0	0	Distal Intergenic	16	51464069	51465096	1028	2	18516	ENSBTAG00000014707	ISG15	ISG15 ubiquitin like modifier
chr16	51463222	51463440	diffreps_chr16_51463221_51463440	3.25	1.83e-10	3.73e-09	Promoter (1-2kb)	16	51464069	51465096	1028	2	1656	ENSBTAG00000014707	ISG15	ISG15 ubiquitin like modifier
chr16	51487542	51489040	diffreps_chr16_51487541_51489040	1.1	0	0	Distal Intergenic	16	51493180	51498783	5604	1	-4140	ENSBTAG00000014540	PERM1	PPARGC1 and ESRR induced regulator, muscle 1
chr16	51500822	51501260	diffreps_chr16_51500821_51501260	1.43	3.99e-08	5.57e-07	Distal Intergenic	16	51493180	51498783	5604	1	7642	ENSBTAG00000014540	PERM1	PPARGC1 and ESRR induced regulator, muscle 1
chr16	51521382	51521740	diffreps_chr16_51521381_51521740	1.01	1.56e-05	0.000134266	Exon (NM_001034326/508638, exon 12 of 19)	16	51514459	51526317	11859	1	6923	ENSBTAG00000016528	NOC2L	NOC2 like nucleolar associated transcriptional repressor
chr16	51545342	51545700	diffreps_chr16_51545341_51545700	1.09	8.4e-05	0.00061119	Distal Intergenic	16	51514459	51526317	11859	1	30883	ENSBTAG00000016528	NOC2L	NOC2 like nucleolar associated transcriptional repressor
chr16	51572642	51574500	diffreps_chr16_51572641_51574500	1.46	0	0	Distal Intergenic	16	51514459	51526317	11859	1	58183	ENSBTAG00000016528	NOC2L	NOC2 like nucleolar associated transcriptional repressor
chr16	51576502	51579560	diffreps_chr16_51576501_51579560	1.4	0	0	Distal Intergenic	16	51514459	51526317	11859	1	62043	ENSBTAG00000016528	NOC2L	NOC2 like nucleolar associated transcriptional repressor
chr16	51746602	51746840	diffreps_chr16_51746601_51746840	1.75	1.89e-06	1.94e-05	Distal Intergenic	16	51777675	51799339	21665	2	52499	ENSBTAG00000018725	FBLIM1	filamin binding LIM protein 1
chr16	51774162	51774960	diffreps_chr16_51774161_51774960	1.17	0	0	Downstream (2-3kb)	16	51777675	51799339	21665	2	24379	ENSBTAG00000018725	FBLIM1	filamin binding LIM protein 1
chr16	51819142	51819620	diffreps_chr16_51819141_51819620	2.48	0	0	Downstream (<1kb)	16	51819920	51824310	4391	2	4690	ENSBTAG00000018723	SLC25A34	solute carrier family 25 member 34
chr16	51836362	51836800	diffreps_chr16_51836361_51836800	1.43	2.71e-08	3.92e-07	Intron (NM_001192416/515552, intron 7 of 19)	16	51819920	51824310	4391	2	-12052	ENSBTAG00000018723	SLC25A34	solute carrier family 25 member 34
chr16	52056442	52056860	diffreps_chr16_52056441_52056860	1.11	2.02e-07	2.49e-06	Downstream (<1kb)	16	52045641	52052536	6896	2	-3906	ENSBTAG00000024497	CTRC	chymotrypsin C
chr16	52124982	52125460	diffreps_chr16_52124981_52125460	1.01	2.74e-06	2.73e-05	Distal Intergenic	16	52057201	52075315	18115	2	-49667	ENSBTAG00000009048	EFHD2	EF-hand domain family member D2
chr16	52179882	52180080	diffreps_chr16_52179881_52180080	4.77	6.75e-13	1.99e-11	Distal Intergenic	16	52057201	52075315	18115	2	-104567	ENSBTAG00000009048	EFHD2	EF-hand domain family member D2
chr16	52404202	52404840	diffreps_chr16_52404201_52404840	1.2	3.7e-10	7.22e-09	Distal Intergenic	16	52283709	52288403	4695	2	-115799	ENSBTAG00000005300	TMEM51	transmembrane protein 51
chr16	52452062	52452400	diffreps_chr16_52452061_52452400	1.03	2.18e-05	0.000181267	Distal Intergenic	16	52283709	52288403	4695	2	-163659	ENSBTAG00000005300	TMEM51	transmembrane protein 51
chr16	59906502	59906720	diffreps_chr16_59906501_59906720	2.67	8.4e-09	1.33e-07	Distal Intergenic	16	59915002	59925322	10321	1	-8282	ENSBTAG00000004941	TEX35	testis expressed 35
chr16	59943402	59943700	diffreps_chr16_59943401_59943700	2.43	8.19e-11	1.79e-09	Distal Intergenic	16	59915002	59925322	10321	1	28400	ENSBTAG00000004941	TEX35	testis expressed 35
chr16	60342502	60343140	diffreps_chr16_60342501_60343140	1.1	1.47e-10	3.06e-09	Distal Intergenic	16	60375473	60412594	37122	1	-32333	ENSBTAG00000013999	FAM20B	FAM20B glycosaminoglycan xylosylkinase
chr16	62256402	62256680	diffreps_chr16_62256401_62256680	2.04	2.61e-08	3.77e-07	Distal Intergenic	16	62161434	62179518	18085	1	94968	ENSBTAG00000009924	MR1	major histocompatibility complex, class I-related
chr16	62544702	62545080	diffreps_chr16_62544701_62545080	1.09	4.95e-06	4.7e-05	Distal Intergenic	16	62612418	62941402	328985	1	-67338	ENSBTAG00000020887	CACNA1E	calcium voltage-gated channel subunit alpha1 E
chr16	63187562	63187940	diffreps_chr16_63187561_63187940	1.46	2.34e-07	2.86e-06	Distal Intergenic	16	63468052	63478623	10572	2	290683	ENSBTAG00000013631	GLUL	glutamate-ammonia ligase
chr16	64950942	64951520	diffreps_chr16_64950941_64951520	1.28	5.14e-10	9.78e-09	Exon (NM_001205895/522344, exon 16 of 18)	16	64972407	65091021	118615	2	139501	ENSBTAG00000035836	COLGALT2	collagen beta(1-O)galactosyltransferase 2
chr16	65203882	65204180	diffreps_chr16_65203881_65204180	1.92	2.86e-08	4.1e-07	Distal Intergenic	16	65100661	65130516	29856	1	103221	ENSBTAG00000016369	TSEN15	tRNA splicing endonuclease subunit 15
chr16	66019842	66020500	diffreps_chr16_66019841_66020500	1.44	3.1e-13	9.58e-12	Distal Intergenic	16	65831740	66012042	180303	2	-7800	ENSBTAG00000014548	NIBAN1	niban apoptosis regulator 1
chr16	69238762	69239300	diffreps_chr16_69238761_69239300	1.43	9.37e-11	2.01e-09	Intron (NM_001076364/615229, intron 10 of 11)	16	69234234	69287685	53452	2	48385	ENSBTAG00000013166	SMYD2	SET and MYND domain containing 2
chr16	69239442	69240020	diffreps_chr16_69239441_69240020	1.04	6.19e-11	1.37e-09	Exon (NM_001076364/615229, exon 10 of 12)	16	69234234	69287685	53452	2	47665	ENSBTAG00000013166	SMYD2	SET and MYND domain containing 2
chr16	69242622	69243080	diffreps_chr16_69242621_69243080	1.38	1.8e-09	3.15e-08	Intron (NM_001076364/615229, intron 7 of 11)	16	69234234	69287685	53452	2	44605	ENSBTAG00000013166	SMYD2	SET and MYND domain containing 2
chr16	70667342	70667760	diffreps_chr16_70667341_70667760	1.07	8.9e-07	9.71e-06	Distal Intergenic	16	70636107	70639618	3512	2	-27724	NA	VASH2	vasohibin 2
chr16	70914722	70914940	diffreps_chr16_70914721_70914940	4.87	6.27e-14	2.11e-12	Downstream (2-3kb)	16	70917389	70919613	2225	2	4673	ENSBTAG00000052787	FAM71A	family with sequence similarity 71 member A
chr16	71053922	71054420	diffreps_chr16_71053921_71054420	1.39	5.29e-09	8.68e-08	Distal Intergenic	16	71127128	71133701	6574	2	79281	ENSBTAG00000000759	NENF	neudesin neurotrophic factor
chr16	71055342	71055540	diffreps_chr16_71055341_71055540	1.31	0.000518548	0.00308334	Distal Intergenic	16	71127128	71133701	6574	2	78161	ENSBTAG00000000759	NENF	neudesin neurotrophic factor
chr16	71868002	71868580	diffreps_chr16_71868001_71868580	1.19	1.93e-08	2.86e-07	Promoter (<=1kb)	16	71867915	71872152	4238	1	87	ENSBTAG00000010909	SLC30A1	solute carrier family 30 member 1
chr16	71934702	71934940	diffreps_chr16_71934701_71934940	1.75	1.89e-06	1.94e-05	Distal Intergenic	16	71867915	71872152	4238	1	66787	ENSBTAG00000010909	SLC30A1	solute carrier family 30 member 1
chr16	72756782	72757360	diffreps_chr16_72756781_72757360	1.07	1.39e-08	2.12e-07	Distal Intergenic	16	73094210	73105682	11473	2	348322	ENSBTAG00000010850	SERTAD4	SERTA domain containing 4
chr16	72931742	72931940	diffreps_chr16_72931741_72931940	2.31	2.45e-07	2.98e-06	Distal Intergenic	16	73094210	73105682	11473	2	173742	ENSBTAG00000010850	SERTAD4	SERTA domain containing 4
chr16	72938622	72939020	diffreps_chr16_72938621_72939020	1.15	1.07e-06	1.15e-05	Distal Intergenic	16	73094210	73105682	11473	2	166662	ENSBTAG00000010850	SERTAD4	SERTA domain containing 4
chr16	72981622	72981920	diffreps_chr16_72981621_72981920	1.87	8.67e-08	1.14e-06	Distal Intergenic	16	73094210	73105682	11473	2	123762	ENSBTAG00000010850	SERTAD4	SERTA domain containing 4
chr16	73555382	73555840	diffreps_chr16_73555381_73555840	1.27	1.34e-08	2.03e-07	Distal Intergenic	16	73527229	73547811	20583	2	-7571	ENSBTAG00000002846	TRAF3IP3	TRAF3 interacting protein 3
chr16	73750782	73751040	diffreps_chr16_73750781_73751040	2.83	3.27e-11	7.55e-10	Distal Intergenic	16	73713244	73743999	30756	2	-6783	ENSBTAG00000016541	CAMK1G	calcium/calmodulin dependent protein kinase IG
chr16	75120182	75120700	diffreps_chr16_75120181_75120700	1.36	1.03e-10	2.2e-09	Distal Intergenic	16	75142540	75349329	206790	1	-21840	ENSBTAG00000001173	PLXNA2	plexin A2
chr16	75231542	75231800	diffreps_chr16_75231541_75231800	3.6	6.05e-14	2.04e-12	Intron (NM_001206657/407770, intron 3 of 30)	16	75196717	75196779	63	1	34825	ENSBTAG00000054210	MIR6121	microRNA mir-6121
chr16	75232262	75233080	diffreps_chr16_75232261_75233080	1.47	0	0	Intron (NM_001206657/407770, intron 3 of 30)	16	75196717	75196779	63	1	35545	ENSBTAG00000054210	MIR6121	microRNA mir-6121
chr16	75415682	75416140	diffreps_chr16_75415681_75416140	1.08	1.09e-07	1.41e-06	Distal Intergenic	16	75466180	75489273	23094	1	-50040	ENSBTAG00000010562	CD34	CD34 molecule
chr16	79024122	79025100	diffreps_chr16_79024121_79025100	1.45	0	0	Distal Intergenic	16	78829189	78957232	128044	1	194933	ENSBTAG00000009265	NR5A2	nuclear receptor subfamily 5 group A member 2
chr16	79566062	79567340	diffreps_chr16_79566061_79567340	1.35	0	0	Distal Intergenic	16	79675967	79688109	12143	2	120769	ENSBTAG00000051448	TMEM9	transmembrane protein 9
chr16	79663402	79663640	diffreps_chr16_79663401_79663640	2.23	2.92e-08	4.18e-07	Distal Intergenic	16	79675967	79688109	12143	2	24469	ENSBTAG00000051448	TMEM9	transmembrane protein 9
chr16	79741922	79742580	diffreps_chr16_79741921_79742580	1.24	1.22e-15	5.09e-14	Distal Intergenic	16	79787223	79824967	37745	1	-44643	ENSBTAG00000046350	PKP1	plakophilin 1
chr16	79754862	79756180	diffreps_chr16_79754861_79756180	1.08	0	0	Distal Intergenic	16	79787223	79824967	37745	1	-31043	ENSBTAG00000046350	PKP1	plakophilin 1
chr16	79842642	79843200	diffreps_chr16_79842641_79843200	1.76	2.33e-15	9.41e-14	Distal Intergenic	16	79860466	79865628	5163	1	-17266	ENSBTAG00000019927	CYB5R1	cytochrome b5 reductase 1
chr16	79925862	79926140	diffreps_chr16_79925861_79926140	1.26	8.86e-05	0.000641056	Distal Intergenic	16	79913789	79917703	3915	1	12073	ENSBTAG00000013560	RABIF	RAB interacting factor
chr16	79926902	79927140	diffreps_chr16_79926901_79927140	3.59	9.26e-12	2.31e-10	Distal Intergenic	16	79913789	79917703	3915	1	13113	ENSBTAG00000013560	RABIF	RAB interacting factor
chr16	80232642	80233140	diffreps_chr16_80232641_80233140	1.1	7.29e-08	9.74e-07	Distal Intergenic	16	80305103	80309733	4631	1	-71963	ENSBTAG00000004790	UBE2T	ubiquitin conjugating enzyme E2 T
chr16	80391682	80392180	diffreps_chr16_80391681_80392180	1.14	5.37e-07	6.11e-06	Distal Intergenic	16	80421563	80428744	7182	1	-29383	ENSBTAG00000003016	PTPN7	protein tyrosine phosphatase non-receptor type 7
chr16	80444042	80444820	diffreps_chr16_80444041_80444820	2.28	0	0	Promoter (<=1kb)	16	80440033	80443949	3917	2	-93	ENSBTAG00000014992	GPR37L1	G protein-coupled receptor 37 like 1
chr16	80650882	80653660	diffreps_chr16_80650881_80653660	1.39	0	0	Distal Intergenic	16	80548456	80575804	27349	1	102426	ENSBTAG00000021576	LMOD1	leiomodin 1
chr16	80713342	80715220	diffreps_chr16_80713341_80715220	1.11	0	0	Distal Intergenic	16	80847188	80867560	20373	1	-131968	ENSBTAG00000016057	CSRP1	cysteine and glycine rich protein 1
chr16	80716962	80718040	diffreps_chr16_80716961_80718040	1.58	0	0	Distal Intergenic	16	80847188	80867560	20373	1	-129148	ENSBTAG00000016057	CSRP1	cysteine and glycine rich protein 1
chr16	80723282	80723500	diffreps_chr16_80723281_80723500	1.22	0.000878738	0.00488726	Distal Intergenic	16	80847188	80867560	20373	1	-123688	ENSBTAG00000016057	CSRP1	cysteine and glycine rich protein 1
chr16	80811522	80812020	diffreps_chr16_80811521_80812020	2.33	0	0	Distal Intergenic	16	80847188	80867560	20373	1	-35168	ENSBTAG00000016057	CSRP1	cysteine and glycine rich protein 1
chr16	80841842	80842680	diffreps_chr16_80841841_80842680	1.65	0	0	Distal Intergenic	16	80847188	80867560	20373	1	-4508	ENSBTAG00000016057	CSRP1	cysteine and glycine rich protein 1
chr16	80870562	80870760	diffreps_chr16_80870561_80870760	1.38	0.000309643	0.0019544	Distal Intergenic	16	80847188	80867560	20373	1	23374	ENSBTAG00000016057	CSRP1	cysteine and glycine rich protein 1
chr17	10248182	10248500	diffreps_chr17_10248181_10248500	1.6	2.82e-07	3.39e-06	Intron (NM_001076830/510704, intron 7 of 22)	17	10028139	10404757	376619	2	156257	ENSBTAG00000002531	ARHGAP10	Rho GTPase activating protein 10
chr17	12103122	12103480	diffreps_chr17_12103121_12103480	1.36	2.32e-06	2.35e-05	Distal Intergenic	17	12162216	12177198	14983	2	73718	ENSBTAG00000014060	LSM6	LSM6 homolog, U6 small nuclear RNA and mRNA degradation associated
chr17	17348942	17349240	diffreps_chr17_17348941_17349240	1.06	0.00017768	0.00119366	Distal Intergenic	17	17324466	17336366	11901	2	-12576	ENSBTAG00000022109	SCOC	short coiled-coil protein
chr17	17458982	17459420	diffreps_chr17_17458981_17459420	2.19	1.6e-13	5.1e-12	Distal Intergenic	17	17324466	17336366	11901	2	-122616	ENSBTAG00000022109	SCOC	short coiled-coil protein
chr17	39802782	39802980	diffreps_chr17_39802781_39802980	2.45	9.11e-08	1.19e-06	Distal Intergenic	17	39633253	39729752	96500	2	-73030	ENSBTAG00000012450	RAPGEF2	Rap guanine nucleotide exchange factor 2
chr17	44674822	44675700	diffreps_chr17_44674821_44675700	1.68	0	0	Distal Intergenic	17	44585348	44588896	3549	2	-85926	ENSBTAG00000007496	P2RX2	purinergic receptor P2X 2
chr17	44678962	44680760	diffreps_chr17_44678961_44680760	1.22	0	0	Distal Intergenic	17	44585348	44588896	3549	2	-90066	ENSBTAG00000007496	P2RX2	purinergic receptor P2X 2
chr17	44745582	44747460	diffreps_chr17_44745581_44747460	1.16	0	0	Distal Intergenic	17	44854047	44939628	85582	1	-106587	ENSBTAG00000005644	GALNT9	polypeptide N-acetylgalactosaminyltransferase 9
chr17	44768022	44768400	diffreps_chr17_44768021_44768400	1.08	7.23e-06	6.65e-05	Distal Intergenic	17	44854047	44939628	85582	1	-85647	ENSBTAG00000005644	GALNT9	polypeptide N-acetylgalactosaminyltransferase 9
chr17	44768502	44770520	diffreps_chr17_44768501_44770520	1.33	0	0	Distal Intergenic	17	44854047	44939628	85582	1	-83527	ENSBTAG00000005644	GALNT9	polypeptide N-acetylgalactosaminyltransferase 9
chr17	45180962	45181680	diffreps_chr17_45180961_45181680	1.34	2.36e-13	7.42e-12	Exon (NM_001205927/526310, exon 21 of 28)	17	45177727	45199589	21863	2	17909	ENSBTAG00000012987	ULK1	unc-51 like autophagy activating kinase 1
chr17	45241782	45242280	diffreps_chr17_45241781_45242280	1.2	8.89e-09	1.4e-07	Distal Intergenic	17	45177727	45199589	21863	2	-42193	ENSBTAG00000012987	ULK1	unc-51 like autophagy activating kinase 1
chr17	45243162	45244020	diffreps_chr17_45243161_45244020	1.33	0	0	Distal Intergenic	17	45177727	45199589	21863	2	-43573	ENSBTAG00000012987	ULK1	unc-51 like autophagy activating kinase 1
chr17	4552262	4553140	diffreps_chr17_4552261_4553140	1.67	0	0	Distal Intergenic	17	4309173	4436986	127814	2	-115276	ENSBTAG00000008816	TRIM2	tripartite motif containing 2
chr17	47063542	47063800	diffreps_chr17_47063541_47063800	1.07	0.000175666	0.00118122	Distal Intergenic	17	46932746	46934705	1960	2	-128837	ENSBTAG00000007047	FZD10	frizzled class receptor 10
chr17	5043862	5044160	diffreps_chr17_5043861_5044160	3.09	5.77e-13	1.72e-11	Distal Intergenic	17	4730018	4887492	157475	2	-156370	ENSBTAG00000008438	ARFIP1	ADP ribosylation factor interacting protein 1
chr17	51029482	51030360	diffreps_chr17_51029481_51030360	1.11	0	0	Distal Intergenic	17	50929377	51022466	93090	1	100105	ENSBTAG00000014269	SCARB1	scavenger receptor class B member 1
chr17	51320322	51320700	diffreps_chr17_51320321_51320700	1.14	9.06e-06	8.18e-05	Distal Intergenic	17	51466603	51469982	3380	2	149282	ENSBTAG00000039688	RFLNA	refilin A
chr17	51373102	51373580	diffreps_chr17_51373101_51373580	1.29	5.29e-08	7.24e-07	Distal Intergenic	17	51466603	51469982	3380	2	96402	ENSBTAG00000039688	RFLNA	refilin A
chr17	51384542	51384740	diffreps_chr17_51384541_51384740	3.77	3.45e-11	7.89e-10	Distal Intergenic	17	51466603	51469982	3380	2	85242	ENSBTAG00000039688	RFLNA	refilin A
chr17	51461602	51462000	diffreps_chr17_51461601_51462000	1.12	3.32e-06	3.25e-05	Distal Intergenic	17	51466603	51469982	3380	2	7982	ENSBTAG00000039688	RFLNA	refilin A
chr17	52671702	52672700	diffreps_chr17_52671701_52672700	1.78	0	0	Distal Intergenic	17	52637342	52668724	31383	1	34360	ENSBTAG00000048809	VPS37B	VPS37B subunit of ESCRT-I
chr17	52676962	52677280	diffreps_chr17_52676961_52677280	1.13	5.47e-05	0.000416075	Distal Intergenic	17	52637342	52668724	31383	1	39620	ENSBTAG00000048809	VPS37B	VPS37B subunit of ESCRT-I
chr17	53240422	53242160	diffreps_chr17_53240421_53242160	2.05	0	0	Intron (NM_001369916/783217, intron 1 of 16)	17	53227829	53284407	56579	2	42247	ENSBTAG00000004189	MLXIP	MLX interacting protein
chr17	53307682	53308160	diffreps_chr17_53307681_53308160	1.33	5.58e-10	1.06e-08	Distal Intergenic	17	53223801	53284518	60718	2	-23164	ENSBTAG00000004189	MLXIP	MLX interacting protein
chr17	53470442	53470740	diffreps_chr17_53470441_53470740	1.31	1.22e-05	0.000107167	3' UTR	17	53458851	53470907	12057	1	11591	ENSBTAG00000004175	HPD	4-hydroxyphenylpyruvate dioxygenase
chr17	53490642	53491240	diffreps_chr17_53490641_53491240	1.22	1.02e-13	3.33e-12	Distal Intergenic	17	53509789	53523522	13734	1	-18549	ENSBTAG00000032534	RHOF	ras homolog family member F, filopodia associated
chr17	53522142	53523400	diffreps_chr17_53522141_53523400	1.48	0	0	3' UTR	17	53509789	53523522	13734	1	12353	ENSBTAG00000032534	RHOF	ras homolog family member F, filopodia associated
chr17	53625982	53626320	diffreps_chr17_53625981_53626320	1.86	6.77e-09	1.09e-07	Promoter (<=1kb)	17	53610726	53625674	14949	2	-308	ENSBTAG00000004457	ORAI1	ORAI calcium release-activated calcium modulator 1
chr17	53627322	53627720	diffreps_chr17_53627321_53627720	1.36	2.45e-07	2.98e-06	Promoter (1-2kb)	17	53610726	53625674	14949	2	-1648	ENSBTAG00000004457	ORAI1	ORAI calcium release-activated calcium modulator 1
chr17	53709382	53709700	diffreps_chr17_53709381_53709700	1.06	0.00017768	0.00119366	Distal Intergenic	17	53610726	53625674	14949	2	-83708	ENSBTAG00000004457	ORAI1	ORAI calcium release-activated calcium modulator 1
chr17	53718622	53718840	diffreps_chr17_53718621_53718840	2.42	3.71e-08	5.21e-07	Distal Intergenic	17	53772948	53793651	20704	2	74811	ENSBTAG00000002315	RNF34	ring finger protein 34
chr17	55079882	55080320	diffreps_chr17_55079881_55080320	1.62	6.46e-10	1.21e-08	Intron (NM_001192597/524491, intron 16 of 21)	17	55151093	55175813	24721	1	-70773	ENSBTAG00000009101	SH2B3	SH2B adaptor protein 3
chr17	55083482	55083860	diffreps_chr17_55083481_55083860	1.11	6.79e-06	6.28e-05	Exon (NM_001192597/524491, exon 18 of 22)	17	55151093	55175813	24721	1	-67233	ENSBTAG00000009101	SH2B3	SH2B adaptor protein 3
chr17	57321962	57323540	diffreps_chr17_57321961_57323540	1.36	0	0	Exon (NM_001206862/617325, exon 3 of 19)	17	57231745	57662039	430295	1	90217	ENSBTAG00000044119	KSR2	kinase suppressor of ras 2
chr17	57323622	57323860	diffreps_chr17_57323621_57323860	1.11	0.000343045	0.00214402	Intron (NM_001206862/617325, intron 3 of 18)	17	57231745	57662039	430295	1	91877	ENSBTAG00000044119	KSR2	kinase suppressor of ras 2
chr17	57335862	57336280	diffreps_chr17_57335861_57336280	1.15	2.57e-07	3.1e-06	Intron (NM_001206862/617325, intron 3 of 18)	17	57231745	57662039	430295	1	104117	ENSBTAG00000044119	KSR2	kinase suppressor of ras 2
chr17	57928582	57929180	diffreps_chr17_57928581_57929180	1.59	0	0	Distal Intergenic	17	57900935	57923010	22076	1	27647	ENSBTAG00000032097	FBXO21	F-box protein 21
chr17	57931942	57932380	diffreps_chr17_57931941_57932380	1.4	7.26e-09	1.16e-07	Distal Intergenic	17	57900935	57923010	22076	1	31007	ENSBTAG00000032097	FBXO21	F-box protein 21
chr17	58289562	58289880	diffreps_chr17_58289561_58289880	1.71	1.15e-07	1.48e-06	Distal Intergenic	17	58250528	58266917	16390	1	39034	ENSBTAG00000047139	SPRING1	SREBF pathway regulator in golgi 1
chr17	58911882	58912240	diffreps_chr17_58911881_58912240	1.64	4.8e-08	6.61e-07	Distal Intergenic	17	58611028	58890372	279345	1	300854	ENSBTAG00000001888	MED13L	mediator complex subunit 13L
chr17	61123822	61124220	diffreps_chr17_61123821_61124220	1.22	6.04e-07	6.79e-06	3' UTR	17	61086358	61123903	37546	1	37464	ENSBTAG00000016738	DTX1	deltex E3 ubiquitin ligase 1
chr17	61297542	61298040	diffreps_chr17_61297541_61298040	1.8	3.8e-13	1.16e-11	Intron (NM_001177596/508887, intron 12 of 16)	17	61286703	61316683	29981	2	18643	ENSBTAG00000011103	SLC8B1	solute carrier family 8 member B1
chr17	61327642	61328280	diffreps_chr17_61327641_61328280	1.28	2e-11	4.75e-10	Distal Intergenic	17	61286703	61316683	29981	2	-10959	ENSBTAG00000011103	SLC8B1	solute carrier family 8 member B1
chr17	62019122	62019460	diffreps_chr17_62019121_62019460	2.94	1.4e-14	5.09e-13	Distal Intergenic	17	62027374	62046781	19408	2	27321	ENSBTAG00000008761	TRAFD1	TRAF-type zinc finger domain containing 1
chr17	62064262	62064680	diffreps_chr17_62064261_62064680	1.12	4.04e-07	4.7e-06	Distal Intergenic	17	62067779	62129018	61240	1	-3099	ENSBTAG00000006666	NAA25	N-alpha-acetyltransferase 25, NatB auxiliary subunit
chr17	62341702	62342360	diffreps_chr17_62341701_62342360	1.01	1.3e-10	2.72e-09	Distal Intergenic	17	62300434	62326158	25725	2	-15544	ENSBTAG00000008743	ALDH2	aldehyde dehydrogenase 2 family member
chr17	62579582	62581160	diffreps_chr17_62579581_62581160	1.05	0	0	Distal Intergenic	17	62557773	62561795	4023	2	-17787	ENSBTAG00000017389	RPLP0	ribosomal protein lateral stalk subunit P0
chr17	62673882	62674560	diffreps_chr17_62673881_62674560	1.7	0	0	Intron (NM_001081527/527436, intron 9 of 13)	17	62664107	62686348	22242	2	11788	ENSBTAG00000009800	MSI1	musashi RNA binding protein 1
chr17	62749262	62749840	diffreps_chr17_62749261_62749840	1.6	3.82e-13	1.17e-11	Promoter (<=1kb)	17	62747153	62749467	2315	2	0	ENSBTAG00000012790	TRIAP1	TP53 regulated inhibitor of apoptosis 1
chr17	62855382	62855820	diffreps_chr17_62855381_62855820	1.28	1.13e-07	1.46e-06	Promoter (1-2kb)	17	62851534	62853815	2282	2	-1567	ENSBTAG00000005385	POP5	POP5 homolog, ribonuclease P/MRP subunit
chr17	62958262	62958500	diffreps_chr17_62958261_62958500	3.97	3.7e-13	1.13e-11	Exon (NM_001206287/617896, exon 2 of 5)	17	62955353	62964687	9335	1	2909	ENSBTAG00000007483	UNC119B	unc-119 lipid binding chaperone B
chr17	63159782	63160020	diffreps_chr17_63159781_63160020	3.65	2.1e-12	5.78e-11	Distal Intergenic	17	63165815	63182551	16737	1	-5795	ENSBTAG00000021795	HNF1A	HNF1 homeobox A
chr17	63402222	63402840	diffreps_chr17_63402221_63402840	1.29	3.07e-12	8.26e-11	Distal Intergenic	17	63426727	63447169	20443	1	-23887	ENSBTAG00000000031	TRPV4	transient receptor potential cation channel subfamily V member 4
chr17	63431542	63432100	diffreps_chr17_63431541_63432100	1.01	2.83e-09	4.82e-08	Intron (NM_001192385/540259, intron 2 of 14)	17	63426727	63447169	20443	1	4815	ENSBTAG00000000031	TRPV4	transient receptor potential cation channel subfamily V member 4
chr17	63434002	63434240	diffreps_chr17_63434001_63434240	1.07	0.000736808	0.00420228	Intron (NM_001192385/540259, intron 2 of 14)	17	63426727	63447169	20443	1	7275	ENSBTAG00000000031	TRPV4	transient receptor potential cation channel subfamily V member 4
chr17	63607462	63607660	diffreps_chr17_63607461_63607660	3.48	8.45e-11	1.83e-09	Downstream (1-2kb)	17	63609605	63628524	18920	2	20864	ENSBTAG00000005183	MVK	mevalonate kinase
chr17	63977082	63977460	diffreps_chr17_63977081_63977460	1.08	5.03e-06	4.77e-05	Promoter (<=1kb)	17	63977760	63983534	5775	1	-300	ENSBTAG00000019846	ALKBH2	alkB homolog 2, alpha-ketoglutarate dependent dioxygenase
chr17	64262642	64263020	diffreps_chr17_64262641_64263020	1.14	2.2e-06	2.23e-05	Intron (NM_001081590/515798, intron 3 of 10)	17	64298475	64314720	16246	1	-35455	ENSBTAG00000031851	SELPLG	selectin P ligand
chr17	64267262	64267620	diffreps_chr17_64267261_64267620	2.52	3.07e-13	9.49e-12	Intron (NM_001081590/515798, intron 3 of 10)	17	64298475	64314720	16246	1	-30855	ENSBTAG00000031851	SELPLG	selectin P ligand
chr17	64316082	64316420	diffreps_chr17_64316081_64316420	1.04	6.24e-05	0.000468046	Distal Intergenic	17	64327826	64333741	5916	1	-11406	ENSBTAG00000031849	TMEM119	transmembrane protein 119
chr17	64362402	64362820	diffreps_chr17_64362401_64362820	1.03	2.2e-05	0.00018246	Promoter (<=1kb)	17	64357116	64363222	6107	2	402	ENSBTAG00000011787	ISCU	iron-sulfur cluster assembly enzyme
chr17	65093042	65093460	diffreps_chr17_65093041_65093460	1.05	7.48e-06	6.87e-05	Distal Intergenic	17	65032758	65083923	51166	1	60284	ENSBTAG00000006592	SGSM1	small G protein signaling modulator 1
chr17	65170902	65171160	diffreps_chr17_65170901_65171160	4.48	5.11e-15	1.97e-13	Distal Intergenic	17	65290954	65297597	6644	1	-119794	ENSBTAG00000001255	CRYBB3	crystallin beta B3
chr17	65176382	65176760	diffreps_chr17_65176381_65176760	1.03	1.9e-06	1.95e-05	Distal Intergenic	17	65290954	65297597	6644	1	-114194	ENSBTAG00000001255	CRYBB3	crystallin beta B3
chr17	65178622	65178820	diffreps_chr17_65178621_65178820	1.45	0.000179657	0.00120466	Distal Intergenic	17	65290954	65297597	6644	1	-112134	ENSBTAG00000001255	CRYBB3	crystallin beta B3
chr17	65184182	65184620	diffreps_chr17_65184181_65184620	1.74	3.89e-11	8.83e-10	Distal Intergenic	17	65290954	65297597	6644	1	-106334	ENSBTAG00000001255	CRYBB3	crystallin beta B3
chr17	65196882	65197500	diffreps_chr17_65196881_65197500	1.14	9.85e-10	1.8e-08	Distal Intergenic	17	65290954	65297597	6644	1	-93454	ENSBTAG00000001255	CRYBB3	crystallin beta B3
chr17	65271362	65272460	diffreps_chr17_65271361_65272460	1.77	0	0	Distal Intergenic	17	65290954	65297597	6644	1	-18494	ENSBTAG00000001255	CRYBB3	crystallin beta B3
chr17	65293142	65293520	diffreps_chr17_65293141_65293520	1.05	2.65e-06	2.65e-05	Intron (NM_174527/282206, intron 2 of 5)	17	65290954	65297597	6644	1	2188	ENSBTAG00000001255	CRYBB3	crystallin beta B3
chr17	65320142	65320400	diffreps_chr17_65320141_65320400	1.85	5.41e-07	6.14e-06	Distal Intergenic	17	65307768	65318605	10838	1	12374	ENSBTAG00000004088	CRYBB2	crystallin beta B2
chr17	65540362	65541440	diffreps_chr17_65540361_65541440	1.76	0	0	Distal Intergenic	17	65558887	65558965	79	1	-17447	NA	MIR10020	microRNA mir-10020
chr17	65541482	65543240	diffreps_chr17_65541481_65543240	1.08	0	0	Distal Intergenic	17	65558887	65558965	79	1	-15647	NA	MIR10020	microRNA mir-10020
chr17	66068022	66068340	diffreps_chr17_66068021_66068340	1.2	3.37e-05	0.000268378	Distal Intergenic	17	66164553	66180903	16351	2	112563	ENSBTAG00000012288	TFIP11	tuftelin interacting protein 11
chr17	66119262	66120140	diffreps_chr17_66119261_66120140	1.14	0	0	Distal Intergenic	17	66164553	66180903	16351	2	60763	ENSBTAG00000012288	TFIP11	tuftelin interacting protein 11
chr17	67421682	67421940	diffreps_chr17_67421681_67421940	1.06	0.000253866	0.00163814	Distal Intergenic	17	67268869	67330126	61258	2	-91556	ENSBTAG00000017799	PITPNB	phosphatidylinositol transfer protein beta
chr17	68244162	68244940	diffreps_chr17_68244161_68244940	1.33	2.22e-16	9.84e-15	Distal Intergenic	17	68404808	68407909	3102	2	162969	ENSBTAG00000012892	C17H22orf31	chromosome 17 C22orf31 homolog
chr17	68539262	68539820	diffreps_chr17_68539261_68539820	1.03	4.95e-10	9.43e-09	Intron (NM_001101867/506282, intron 14 of 15)	17	68547858	68550394	2537	2	10574	ENSBTAG00000017750	RHBDD3	rhomboid domain containing 3
chr17	68653722	68654120	diffreps_chr17_68653721_68654120	1.42	4.3e-08	5.96e-07	Distal Intergenic	17	68598719	68647088	48370	2	-6634	ENSBTAG00000001189	AP1B1	adaptor related protein complex 1 subunit beta 1
chr17	68657162	68657420	diffreps_chr17_68657161_68657420	1.71	3.2e-06	3.15e-05	Distal Intergenic	17	68598719	68647088	48370	2	-10074	ENSBTAG00000001189	AP1B1	adaptor related protein complex 1 subunit beta 1
chr17	68861022	68861220	diffreps_chr17_68861021_68861220	2.96	2.93e-09	4.97e-08	Distal Intergenic	17	68864266	68887043	22778	2	25823	ENSBTAG00000017890	ZMAT5	zinc finger matrin-type 5
chr17	69276522	69277480	diffreps_chr17_69276521_69277480	1.78	0	0	Distal Intergenic	17	69282314	69286246	3933	2	8766	ENSBTAG00000016163	OSM	oncostatin M
chr17	69282602	69282980	diffreps_chr17_69282601_69282980	1.05	1.32e-06	1.39e-05	3' UTR	17	69282314	69286246	3933	2	3266	ENSBTAG00000016163	OSM	oncostatin M
chr17	69301622	69303640	diffreps_chr17_69301621_69303640	1.18	0	0	Promoter (1-2kb)	17	69300857	69305373	4517	2	1733	ENSBTAG00000018084	CASTOR1	cytosolic arginine sensor for mTORC1 subunit 1
chr17	69387102	69387620	diffreps_chr17_69387101_69387620	3.64	0	0	Distal Intergenic	17	69398586	69420052	21467	1	-10966	ENSBTAG00000017404	SEC14L2	SEC14 like lipid binding 2
chr17	69423662	69425500	diffreps_chr17_69423661_69425500	1.14	0	0	Promoter (<=1kb)	17	69423142	69426744	3603	1	520	ENSBTAG00000018116	MTFP1	mitochondrial fission process 1
chr17	69575322	69575600	diffreps_chr17_69575321_69575600	3.32	1.21e-12	3.45e-11	Distal Intergenic	17	69579627	69595610	15984	1	-4027	ENSBTAG00000002770	TCN2	transcobalamin 2
chr17	69585822	69586400	diffreps_chr17_69585821_69586400	1.54	4.22e-15	1.64e-13	Intron (NM_174195/281518, intron 3 of 8)	17	69579627	69595610	15984	1	6195	ENSBTAG00000002770	TCN2	transcobalamin 2
chr17	69632702	69633460	diffreps_chr17_69632701_69633460	1.5	0	0	Distal Intergenic	17	69639874	69793488	153615	1	-6414	ENSBTAG00000019146	OSBP2	oxysterol binding protein 2
chr17	70038222	70038560	diffreps_chr17_70038221_70038560	1.02	6.33e-05	0.000473801	Promoter (<=1kb)	17	70038814	70092261	53448	1	-254	ENSBTAG00000010662	LIMK2	LIM domain kinase 2
chr17	70089602	70090060	diffreps_chr17_70089601_70090060	1.69	5.17e-11	1.15e-09	Exon (NM_001038098/513539, exon 14 of 16)	17	70094432	70105120	10689	2	15060	ENSBTAG00000010667	PIK3IP1	phosphoinositide-3-kinase interacting protein 1
chr17	70142682	70142940	diffreps_chr17_70142681_70142940	2.19	2.14e-08	3.14e-07	Promoter (<=1kb)	17	70125940	70143421	17482	2	481	ENSBTAG00000005478	PATZ1	POZ/BTB and AT hook containing zinc finger 1
chr17	70520242	70520760	diffreps_chr17_70520241_70520760	1.07	3.18e-07	3.77e-06	Distal Intergenic	17	70503575	70513346	9772	1	16667	ENSBTAG00000031134	YWHAH	tyrosine 3-monooxygenase/tryptophan 5-monooxygenase activation protein eta
chr17	71074782	71075400	diffreps_chr17_71074781_71075400	1.17	4.54e-12	1.19e-10	Distal Intergenic	17	71000212	71001905	1694	2	-72877	ENSBTAG00000046083	ZNF280A	zinc finger protein 280A
chr17	71094602	71094840	diffreps_chr17_71094601_71094840	1.05	0.000519856	0.00308944	Distal Intergenic	17	71000212	71001905	1694	2	-92697	ENSBTAG00000046083	ZNF280A	zinc finger protein 280A
chr17	71200622	71201360	diffreps_chr17_71200621_71201360	1.1	0	0	Distal Intergenic	17	71211568	71219811	8244	2	18451	ENSBTAG00000053568	ZNF70	zinc finger protein 70
chr17	71202822	71203420	diffreps_chr17_71202821_71203420	1.6	2.22e-16	9.84e-15	Distal Intergenic	17	71211568	71219811	8244	2	16391	ENSBTAG00000053568	ZNF70	zinc finger protein 70
chr17	71433222	71434740	diffreps_chr17_71433221_71434740	1.32	0	0	3' UTR	17	71426379	71433950	7572	1	6843	ENSBTAG00000006730	SUSD2	sushi domain containing 2
chr17	71662022	71662280	diffreps_chr17_71662021_71662280	3.04	4.11e-11	9.3e-10	Intron (NM_001205864/519751, intron 4 of 14)	17	71652925	71653000	76	2	-9022	ENSBTAG00000045094	MIR2323	microRNA mir-2323
chr17	71711302	71712240	diffreps_chr17_71711301_71712240	1.54	0	0	Distal Intergenic	17	71612845	71675123	62279	2	-36179	ENSBTAG00000021656	SPECC1L	sperm antigen with calponin homology and coiled-coil domains 1 like
chr17	71728102	71728420	diffreps_chr17_71728101_71728420	2.71	1.36e-12	3.85e-11	Distal Intergenic	17	71612845	71675123	62279	2	-52979	ENSBTAG00000021656	SPECC1L	sperm antigen with calponin homology and coiled-coil domains 1 like
chr17	71734182	71735500	diffreps_chr17_71734181_71735500	1.03	0	0	Distal Intergenic	17	71612845	71675123	62279	2	-59059	ENSBTAG00000021656	SPECC1L	sperm antigen with calponin homology and coiled-coil domains 1 like
chr17	71797462	71798460	diffreps_chr17_71797461_71798460	1.73	0	0	Distal Intergenic	17	71816210	71864794	48585	1	-17750	ENSBTAG00000036113	RSPH14	radial spoke head 14 homolog
chr17	71824742	71825120	diffreps_chr17_71824741_71825120	3.23	0	0	Intron (NM_001046575/616270, intron 4 of 7)	17	71816210	71864794	48585	1	8532	ENSBTAG00000036113	RSPH14	radial spoke head 14 homolog
chr17	71825482	71826860	diffreps_chr17_71825481_71826860	1.2	0	0	Intron (NM_001046575/616270, intron 4 of 7)	17	71816210	71864794	48585	1	9272	ENSBTAG00000036113	RSPH14	radial spoke head 14 homolog
chr17	71966402	71966740	diffreps_chr17_71966401_71966740	3.29	0	0	3' UTR	17	71951343	71966903	15561	1	15059	ENSBTAG00000053372	TOP3B	DNA topoisomerase III beta
chr17	72111302	72112000	diffreps_chr17_72111301_72112000	1.26	1.27e-14	4.64e-13	Downstream (<1kb)	17	72109203	72109297	95	2	-2005	ENSBTAG00000036443	MIR301B	microRNA mir-301b
chr17	72115822	72117340	diffreps_chr17_72115821_72117340	1.33	0	0	Promoter (1-2kb)	17	72112697	72114638	1942	2	-1184	ENSBTAG00000000067	SDF2L1	stromal cell derived factor 2 like 1
chr17	72168462	72169840	diffreps_chr17_72168461_72169840	1.37	0	0	Distal Intergenic	17	72129576	72153596	24021	2	-14866	ENSBTAG00000013038	UBE2L3	ubiquitin conjugating enzyme E2 L3
chr17	72223262	72224180	diffreps_chr17_72223261_72224180	1.7	0	0	Intron (NM_174577/282309, intron 33 of 55)	17	72232285	72238750	6466	1	-8105	ENSBTAG00000013973	SERPIND1	serpin family D member 1
chr17	72271842	72272420	diffreps_chr17_72271841_72272420	1.29	3.87e-11	8.81e-10	Intron (NM_001075959/532261, intron 1 of 4)	17	72268871	72277823	8953	1	2971	ENSBTAG00000020760	SNAP29	synaptosome associated protein 29
chr17	72273102	72273520	diffreps_chr17_72273101_72273520	1.05	2.65e-06	2.65e-05	Intron (NM_001075959/532261, intron 1 of 4)	17	72268871	72277823	8953	1	4231	ENSBTAG00000020760	SNAP29	synaptosome associated protein 29
chr17	72523982	72524580	diffreps_chr17_72523981_72524580	1.08	2.43e-09	4.18e-08	Distal Intergenic	17	72544180	72549141	4962	2	24561	ENSBTAG00000016257	ZNF74	zinc finger protein 74
chr17	72604342	72604960	diffreps_chr17_72604341_72604960	2.72	0	0	Promoter (<=1kb)	17	72596997	72603599	6603	2	-743	ENSBTAG00000018534	ESS2	ess-2 splicing factor homolog
chr17	72634082	72635500	diffreps_chr17_72634081_72635500	1.01	0	0	Distal Intergenic	17	72617237	72619645	2409	2	-14437	ENSBTAG00000008528	SLC25A1	solute carrier family 25 member 1
chr17	72765962	72769260	diffreps_chr17_72765961_72769260	1.48	0	0	Distal Intergenic	17	72790325	72798007	7683	1	-21065	ENSBTAG00000008320	SEPTIN5	septin 5
chr17	72792222	72792480	diffreps_chr17_72792221_72792480	2.22	1.17e-08	1.8e-07	Promoter (1-2kb)	17	72790325	72798007	7683	1	1897	ENSBTAG00000008320	SEPTIN5	septin 5
chr17	72800862	72801820	diffreps_chr17_72800861_72801820	1.2	0	0	Distal Intergenic	17	72790325	72798007	7683	1	10537	ENSBTAG00000008320	SEPTIN5	septin 5
chr17	72891482	72893380	diffreps_chr17_72891481_72893380	1.02	0	0	Exon (NM_174626/282389, exon 8 of 18)	17	72872640	72900700	28061	2	7320	ENSBTAG00000043581	TXNRD2	thioredoxin reductase 2
chr17	72913922	72915660	diffreps_chr17_72913921_72915660	1.75	0	0	3' UTR	17	72915657	72919608	3952	2	3948	ENSBTAG00000001473	ARVCF	ARVCF delta catenin family member
chr17	72943442	72945340	diffreps_chr17_72943441_72945340	1.4	0	0	Distal Intergenic	17	72954593	72954671	79	1	-9253	ENSBTAG00000029769	MIR185	microRNA mir-185
chr17	73098462	73100340	diffreps_chr17_73098461_73100340	1.36	0	0	Distal Intergenic	17	73105796	73123446	17651	1	-5456	ENSBTAG00000047676	PRODH	proline dehydrogenase (oxidase) 1
chr18	10257202	10258200	diffreps_chr18_10257201_10258200	1.02	0	0	Distal Intergenic	18	10240307	10253200	12894	1	16895	ENSBTAG00000004248	MLYCD	malonyl-CoA decarboxylase
chr18	10287122	10288560	diffreps_chr18_10287121_10288560	1.22	0	0	Intron (NM_001077129/768073, intron 1 of 5)	18	10285118	10296094	10977	1	2004	ENSBTAG00000012508	OSGIN1	oxidative stress induced growth inhibitor 1
chr18	10296102	10296500	diffreps_chr18_10296101_10296500	1.98	2.74e-11	6.39e-10	Distal Intergenic	18	10305892	10339843	33952	1	-9392	ENSBTAG00000012508	NECAB2	N-terminal EF-hand calcium binding protein 2
chr18	10676342	10677980	diffreps_chr18_10676341_10677980	1.27	0	0	Distal Intergenic	18	10775781	10820124	44344	2	142144	ENSBTAG00000016315	COTL1	coactosin like F-actin binding protein 1
chr18	10708422	10708940	diffreps_chr18_10708421_10708940	1.04	7.45e-09	1.19e-07	Distal Intergenic	18	10775781	10820124	44344	2	111184	ENSBTAG00000016315	COTL1	coactosin like F-actin binding protein 1
chr18	10723742	10724540	diffreps_chr18_10723741_10724540	1.34	0	0	Distal Intergenic	18	10775781	10820124	44344	2	95584	ENSBTAG00000016315	COTL1	coactosin like F-actin binding protein 1
chr18	10823842	10824260	diffreps_chr18_10823841_10824260	1.15	2.57e-07	3.1e-06	Distal Intergenic	18	10775781	10820124	44344	2	-3718	ENSBTAG00000016315	COTL1	coactosin like F-actin binding protein 1
chr18	10917482	10917960	diffreps_chr18_10917481_10917960	1.13	1.95e-07	2.41e-06	Intron (NM_001098924/510164, intron 4 of 13)	18	10870728	10933881	63154	1	46754	ENSBTAG00000009446	USP10	ubiquitin specific peptidase 10
chr18	10960702	10961160	diffreps_chr18_10960701_10961160	1.2	2.15e-09	3.72e-08	Distal Intergenic	18	10980201	11046043	65843	1	-19041	ENSBTAG00000021176	CRISPLD2	cysteine rich secretory protein LCCL domain containing 2
chr18	11068862	11069060	diffreps_chr18_11068861_11069060	2.31	2.45e-07	2.98e-06	Distal Intergenic	18	10980201	11046043	65843	1	88661	ENSBTAG00000021176	CRISPLD2	cysteine rich secretory protein LCCL domain containing 2
chr18	11086202	11086840	diffreps_chr18_11086201_11086840	1.24	4.31e-12	1.13e-10	Distal Intergenic	18	10980201	11046043	65843	1	106001	ENSBTAG00000021176	CRISPLD2	cysteine rich secretory protein LCCL domain containing 2
chr18	11207342	11207840	diffreps_chr18_11207341_11207840	1.14	1.71e-10	3.52e-09	Distal Intergenic	18	11191534	11203373	11840	2	-3969	ENSBTAG00000020836	CIBAR2	CBY1 interacting BAR domain containing 2
chr18	11309842	11310360	diffreps_chr18_11309841_11310360	1.35	3.42e-10	6.7e-09	Distal Intergenic	18	11191534	11203373	11840	2	-106469	ENSBTAG00000020836	CIBAR2	CBY1 interacting BAR domain containing 2
chr18	11311342	11311540	diffreps_chr18_11311341_11311540	2.31	2.45e-07	2.98e-06	Distal Intergenic	18	11191534	11203373	11840	2	-107969	ENSBTAG00000020836	CIBAR2	CBY1 interacting BAR domain containing 2
chr18	11320102	11321260	diffreps_chr18_11320101_11321260	1.17	0	0	Distal Intergenic	18	11191534	11203373	11840	2	-116729	ENSBTAG00000020836	CIBAR2	CBY1 interacting BAR domain containing 2
chr18	11338182	11339000	diffreps_chr18_11338181_11339000	1.22	2.22e-16	9.84e-15	Distal Intergenic	18	11191534	11203373	11840	2	-134809	ENSBTAG00000020836	CIBAR2	CBY1 interacting BAR domain containing 2
chr18	11369922	11370700	diffreps_chr18_11369921_11370700	1.7	0	0	Distal Intergenic	18	11191534	11203373	11840	2	-166549	ENSBTAG00000020836	CIBAR2	CBY1 interacting BAR domain containing 2
chr18	11424982	11426300	diffreps_chr18_11424981_11426300	1.15	0	0	Distal Intergenic	18	11191534	11203373	11840	2	-221609	ENSBTAG00000020836	CIBAR2	CBY1 interacting BAR domain containing 2
chr18	11524802	11525020	diffreps_chr18_11524801_11525020	3.1	1.78e-10	3.65e-09	Distal Intergenic	18	11758912	11767079	8168	1	-233892	ENSBTAG00000016079	COX4I1	cytochrome c oxidase subunit 4I1
chr18	11616362	11616720	diffreps_chr18_11616361_11616720	1.38	2.18e-06	2.22e-05	Distal Intergenic	18	11758912	11767079	8168	1	-142192	ENSBTAG00000016079	COX4I1	cytochrome c oxidase subunit 4I1
chr18	11773222	11773600	diffreps_chr18_11773221_11773600	1.17	2.88e-06	2.86e-05	Distal Intergenic	18	11747957	11759716	11760	2	-13506	ENSBTAG00000016075	EMC8	ER membrane protein complex subunit 8
chr18	11945982	11947380	diffreps_chr18_11945981_11947380	1.38	0	0	Distal Intergenic	18	11934690	11934763	74	2	-11219	NA	MIR2326	microRNA mir-2326
chr18	12175222	12175820	diffreps_chr18_12175221_12175820	1.66	1.78e-15	7.25e-14	Distal Intergenic	18	12356267	12373832	17566	2	198012	ENSBTAG00000012446	MTHFSD	methenyltetrahydrofolate synthetase domain containing
chr18	12346282	12347320	diffreps_chr18_12346281_12347320	1.4	0	0	Distal Intergenic	18	12356267	12373832	17566	2	26512	ENSBTAG00000012446	MTHFSD	methenyltetrahydrofolate synthetase domain containing
chr18	12886382	12886800	diffreps_chr18_12886381_12886800	1.55	3.14e-09	5.32e-08	Distal Intergenic	18	12973616	12986925	13310	1	-86816	ENSBTAG00000011632	MAP1LC3B	microtubule associated protein 1 light chain 3 beta
chr18	13083002	13084480	diffreps_chr18_13083001_13084480	1.39	0	0	Distal Intergenic	18	12992196	13035765	43570	2	-47237	ENSBTAG00000014267	ZCCHC14	zinc finger CCHC-type containing 14
chr18	13085262	13085680	diffreps_chr18_13085261_13085680	1.16	1.02e-06	1.1e-05	Distal Intergenic	18	12992196	13035765	43570	2	-49497	ENSBTAG00000014267	ZCCHC14	zinc finger CCHC-type containing 14
chr18	13269322	13270040	diffreps_chr18_13269321_13270040	1.76	0	0	Distal Intergenic	18	13298159	13326789	28631	2	56749	ENSBTAG00000006731	SLC7A5	solute carrier family 7 member 5
chr18	13313842	13314040	diffreps_chr18_13313841_13314040	3.45	1.76e-10	3.61e-09	Exon (NM_174613/282369, exon 2 of 10)	18	13298159	13326789	28631	2	12749	ENSBTAG00000006731	SLC7A5	solute carrier family 7 member 5
chr18	13355762	13356500	diffreps_chr18_13355761_13356500	1.22	0	0	Exon (NM_001192409/515359, exon 3 of 7)	18	13345873	13368386	22514	2	11886	ENSBTAG00000010151	CA5A	carbonic anhydrase 5A
chr18	13356602	13358500	diffreps_chr18_13356601_13358500	1.04	0	0	Intron (NM_001192409/515359, intron 2 of 6)	18	13345873	13368386	22514	2	9886	ENSBTAG00000010151	CA5A	carbonic anhydrase 5A
chr18	13405442	13405640	diffreps_chr18_13405441_13405640	2.77	1.01e-08	1.57e-07	Exon (NM_001075620/513446, exon 4 of 13)	18	13381520	13450242	68723	1	23922	ENSBTAG00000023745	BANP	BTG3 associated nuclear protein
chr18	13607182	13607380	diffreps_chr18_13607181_13607380	4.77	6.75e-13	1.99e-11	Distal Intergenic	18	13381520	13450242	68723	1	225662	ENSBTAG00000023745	BANP	BTG3 associated nuclear protein
chr18	13707182	13708000	diffreps_chr18_13707181_13708000	1.46	0	0	Distal Intergenic	18	13886182	13893118	6937	2	185118	ENSBTAG00000051907	CYBA	cytochrome b-245 alpha chain
chr18	13711362	13713160	diffreps_chr18_13711361_13713160	1.19	0	0	Distal Intergenic	18	13886182	13893118	6937	2	179958	ENSBTAG00000051907	CYBA	cytochrome b-245 alpha chain
chr18	13844122	13844320	diffreps_chr18_13844121_13844320	1.56	6.15e-05	0.000462258	Distal Intergenic	18	13886182	13893118	6937	2	48798	ENSBTAG00000051907	CYBA	cytochrome b-245 alpha chain
chr18	13954842	13955780	diffreps_chr18_13954841_13955780	3.24	0	0	Distal Intergenic	18	13962100	13962169	70	2	6389	ENSBTAG00000044808	MIR2327	microRNA mir-2327
chr18	13955822	13957580	diffreps_chr18_13955821_13957580	1.29	0	0	Distal Intergenic	18	13962100	13962169	70	2	4589	ENSBTAG00000044808	MIR2327	microRNA mir-2327
chr18	14002242	14004160	diffreps_chr18_14002241_14004160	1.14	0	0	Distal Intergenic	18	14012891	14015666	2776	2	11506	ENSBTAG00000000639	APRT	adenine phosphoribosyltransferase
chr18	14011862	14014680	diffreps_chr18_14011861_14014680	1.57	0	0	Promoter (<=1kb)	18	14012891	14015666	2776	2	986	ENSBTAG00000000639	APRT	adenine phosphoribosyltransferase
chr18	14254562	14255240	diffreps_chr18_14254561_14255240	1.26	5.17e-14	1.77e-12	Distal Intergenic	18	14258435	14277418	18984	1	-3195	ENSBTAG00000011530	CDH15	cadherin 15
chr18	14255742	14256640	diffreps_chr18_14255741_14256640	2.63	0	0	Promoter (1-2kb)	18	14258435	14277418	18984	1	-1795	ENSBTAG00000011530	CDH15	cadherin 15
chr18	14347142	14348560	diffreps_chr18_14347141_14348560	1.14	0	0	Distal Intergenic	18	14277600	14282164	4565	2	-64978	ENSBTAG00000011533	SLC22A31	solute carrier family 22 member 31
chr18	14526642	14526880	diffreps_chr18_14526641_14526880	2.34	1.14e-08	1.76e-07	Distal Intergenic	18	14535945	14541878	5934	1	-9065	ENSBTAG00000033326	DPEP1	dipeptidase 1
chr18	14570742	14570960	diffreps_chr18_14570741_14570960	2.32	5.28e-08	7.22e-07	Exon (NM_001038577/615171, exon 2 of 13)	18	14568450	14575593	7144	1	2292	ENSBTAG00000033333	CDK10	cyclin dependent kinase 10
chr18	14571082	14571960	diffreps_chr18_14571081_14571960	1.52	0	0	Exon (NM_001038577/615171, exon 3 of 13)	18	14568450	14575593	7144	1	2632	ENSBTAG00000033333	CDK10	cyclin dependent kinase 10
chr18	14668522	14670680	diffreps_chr18_14668521_14670680	1.42	0	0	Exon (NM_001205387/518761, exon 9 of 15)	18	14681468	14702859	21392	1	-10788	ENSBTAG00000012102	TCF25	transcription factor 25
chr18	14704922	14706040	diffreps_chr18_14704921_14706040	1.26	0	0	Promoter (<=1kb)	18	14705093	14706843	1751	1	0	ENSBTAG00000023731	MC1R	melanocortin 1 receptor
chr18	1494022	1494480	diffreps_chr18_1494021_1494480	1.53	3.47e-09	5.84e-08	Distal Intergenic	18	1510933	1570878	59946	2	76398	ENSBTAG00000009357	IL34	interleukin 34
chr18	1516962	1517340	diffreps_chr18_1516961_1517340	1.5	6.18e-08	8.36e-07	Intron (NM_001100324/508292, intron 2 of 6)	18	1510933	1570878	59946	2	53538	ENSBTAG00000009357	IL34	interleukin 34
chr18	15332682	15333060	diffreps_chr18_15332681_15333060	3.01	1.11e-16	5.11e-15	Exon (NM_001193187/618400, exon 5 of 11)	18	15316679	15349339	32661	1	16003	ENSBTAG00000002980	GPT2	glutamic--pyruvic transaminase 2
chr18	15428222	15428880	diffreps_chr18_15428221_15428880	1.16	2.43e-12	6.62e-11	Distal Intergenic	18	15375166	15386724	11559	2	-41498	ENSBTAG00000003757	DNAJA2	DnaJ heat shock protein family (Hsp40) member A2
chr18	15498122	15498580	diffreps_chr18_15498121_15498580	1.24	6.55e-08	8.81e-07	Distal Intergenic	18	15375166	15386724	11559	2	-111398	ENSBTAG00000003757	DNAJA2	DnaJ heat shock protein family (Hsp40) member A2
chr18	17964282	17964620	diffreps_chr18_17964281_17964620	2.53	6.39e-12	1.63e-10	Intron (NM_001101893/508025, intron 7 of 7)	18	17842455	17859350	16896	1	121827	ENSBTAG00000008720	C18H16orf78	chromosome 18 C16orf78 homolog
chr18	18627502	18628080	diffreps_chr18_18627501_18628080	1.71	1.29e-14	4.72e-13	Distal Intergenic	18	18655907	18720625	64719	1	-27827	ENSBTAG00000006208	ADCY7	adenylate cyclase 7
chr18	1921722	1922520	diffreps_chr18_1921721_1922520	1.35	0	0	Promoter (1-2kb)	18	1880242	1920488	40247	2	-1234	ENSBTAG00000016471	PDPR	pyruvate dehydrogenase phosphatase regulatory subunit
chr18	23924602	23925080	diffreps_chr18_23924601_23925080	1.06	8.12e-08	1.08e-06	3' UTR	18	23948965	23975140	26176	1	-23885	ENSBTAG00000011021	CES1	carboxylesterase 1 (monocyte/macrophage serine esterase 1)
chr18	24021722	24022000	diffreps_chr18_24021721_24022000	3.48	1.57e-14	5.66e-13	Downstream (1-2kb)	18	24023719	24025527	1809	2	3527	ENSBTAG00000054808	MT1A	metallothionein-1A
chr18	24046602	24047100	diffreps_chr18_24046601_24047100	1.61	2.33e-13	7.35e-12	Distal Intergenic	18	24042365	24043331	967	2	-3271	ENSBTAG00000023659	MT2A	metallothionein 2A
chr18	24291122	24291500	diffreps_chr18_24291121_24291500	3.52	0	0	Intron (NM_174325/281792, intron 3 of 8)	18	24207779	24253290	45512	1	83343	ENSBTAG00000003798	AMFR	autocrine motility factor receptor
chr18	24325062	24325280	diffreps_chr18_24325061_24325280	1.52	6.81e-05	0.000505341	Intron (NM_174325/281792, intron 3 of 8)	18	24256712	24436695	179984	2	111415	ENSBTAG00000003794	GNAO1	G protein subunit alpha o1
chr18	2453202	2453980	diffreps_chr18_2453201_2453980	1.01	7.39e-14	2.45e-12	3' UTR	18	2453440	2458648	5209	2	4668	ENSBTAG00000006779	LDHD	lactate dehydrogenase D
chr18	24641302	24641600	diffreps_chr18_24641301_24641600	1.05	8.82e-05	0.000638078	Distal Intergenic	18	24682781	24710853	28073	1	-41181	ENSBTAG00000011164	CES5A	carboxylesterase 5A
chr18	24721222	24721760	diffreps_chr18_24721221_24721760	1.57	7.15e-14	2.38e-12	Distal Intergenic	18	24745182	24771810	26629	1	-23422	ENSBTAG00000001852	BREH1	retinyl ester hydrolase type 1
chr18	24985402	24985880	diffreps_chr18_24985401_24985880	3.59	0	0	Distal Intergenic	18	24966368	24977387	11020	1	19034	ENSBTAG00000016896	HERPUD1	homocysteine inducible ER protein with ubiquitin like domain 1
chr18	24995022	24996220	diffreps_chr18_24995021_24996220	1.25	0	0	Distal Intergenic	18	25021803	25021863	61	1	-25583	ENSBTAG00000044215	MIR2285G-1	microRNA mir-2285g-1
chr18	2519962	2521480	diffreps_chr18_2519961_2521480	2.23	0	0	Distal Intergenic	18	2551231	2555890	4660	2	34410	ENSBTAG00000008500	CTRB1	chymotrypsinogen B1
chr18	2526342	2526960	diffreps_chr18_2526341_2526960	1.24	1.05e-12	3.01e-11	Distal Intergenic	18	2551231	2555890	4660	2	28930	ENSBTAG00000008500	CTRB1	chymotrypsinogen B1
chr18	25424222	25424840	diffreps_chr18_25424221_25424840	1.18	5.34e-13	1.61e-11	Distal Intergenic	18	25431301	25444063	12763	2	19223	ENSBTAG00000001854	CIAPIN1	cytokine induced apoptosis inhibitor 1
chr18	25425742	25426860	diffreps_chr18_25425741_25426860	1.2	0	0	Distal Intergenic	18	25431301	25444063	12763	2	17203	ENSBTAG00000001854	CIAPIN1	cytokine induced apoptosis inhibitor 1
chr18	25506202	25506900	diffreps_chr18_25506201_25506900	1.97	0	0	Intron (NM_001077915/513086, intron 4 of 8)	18	25499257	25520835	21579	2	13935	ENSBTAG00000000462	CCDC102A	coiled-coil domain containing 102A
chr18	25507042	25508100	diffreps_chr18_25507041_25508100	1.34	0	0	Exon (NM_001077915/513086, exon 4 of 9)	18	25499257	25520835	21579	2	12735	ENSBTAG00000000462	CCDC102A	coiled-coil domain containing 102A
chr18	25552222	25553820	diffreps_chr18_25552221_25553820	1.12	0	0	3' UTR	18	25526943	25553049	26107	1	25279	ENSBTAG00000005170	ADGRG5	adhesion G protein-coupled receptor G5
chr18	25559422	25561440	diffreps_chr18_25559421_25561440	1.3	0	0	Distal Intergenic	18	25526943	25553049	26107	1	32479	ENSBTAG00000005170	ADGRG5	adhesion G protein-coupled receptor G5
chr18	25720082	25722840	diffreps_chr18_25720081_25722840	1.63	0	0	3' UTR	18	25703330	25721212	17883	1	16752	ENSBTAG00000001848	KATNB1	katanin regulatory subunit B1
chr18	2578122	2578340	diffreps_chr18_2578121_2578340	3.32	4.34e-11	9.78e-10	Exon (NM_001206698/527550, exon 5 of 7)	18	2568362	2572541	4180	1	9760	ENSBTAG00000039914	LOC618826	chymotrypsinogen B1
chr18	25832802	25833640	diffreps_chr18_25832801_25833640	1.36	0	0	Intron (NM_181019/281702, intron 25 of 33)	18	25813830	25882525	68696	2	48885	ENSBTAG00000005702	CNGB1	cyclic nucleotide gated channel subunit beta 1
chr18	25907462	25907820	diffreps_chr18_25907461_25907820	1.26	4.65e-06	4.44e-05	Promoter (<=1kb)	18	25907856	25923158	15303	1	-36	ENSBTAG00000015758	USB1	U6 snRNA biogenesis phosphodiesterase 1
chr18	34046662	34047200	diffreps_chr18_34046661_34047200	1.09	1.67e-09	2.94e-08	Distal Intergenic	18	34122721	34159010	36290	1	-75521	ENSBTAG00000007421	CDH5	cadherin 5
chr18	34047262	34047520	diffreps_chr18_34047261_34047520	2.7	1.06e-10	2.26e-09	Distal Intergenic	18	34122721	34159010	36290	1	-75201	ENSBTAG00000007421	CDH5	cadherin 5
chr18	34052162	34053240	diffreps_chr18_34052161_34053240	1.16	0	0	Distal Intergenic	18	34122721	34159010	36290	1	-69481	ENSBTAG00000007421	CDH5	cadherin 5
chr18	34234122	34234580	diffreps_chr18_34234121_34234580	1.34	4.62e-09	7.64e-08	Distal Intergenic	18	34308154	34330759	22606	1	-73574	ENSBTAG00000032576	CMTM2	CKLF like MARVEL transmembrane domain containing 2
chr18	34237862	34238080	diffreps_chr18_34237861_34238080	1.27	0.000260568	0.00167545	Distal Intergenic	18	34308154	34330759	22606	1	-70074	ENSBTAG00000032576	CMTM2	CKLF like MARVEL transmembrane domain containing 2
chr18	34351562	34352140	diffreps_chr18_34351561_34352140	1.15	4.67e-13	1.41e-11	Exon (NM_001099399/787512, exon 2 of 5)	18	34347768	34357748	9981	1	3794	ENSBTAG00000054188	CMTM3	CKLF like MARVEL transmembrane domain containing 3
chr18	34573542	34573900	diffreps_chr18_34573541_34573900	1.48	2.15e-07	2.64e-06	Distal Intergenic	18	34548879	34557919	9041	1	24663	ENSBTAG00000020889	CA7	carbonic anhydrase 7
chr18	34789562	34789820	diffreps_chr18_34789561_34789820	1.13	0.000481217	0.00289214	Promoter (<=1kb)	18	34787722	34790672	2951	2	852	ENSBTAG00000049665	B3GNT9	UDP-GlcNAc:betaGal beta-1,3-N-acetylglucosaminyltransferase 9
chr18	34801282	34802260	diffreps_chr18_34801281_34802260	1.27	1.89e-15	7.68e-14	Promoter (<=1kb)	18	34803086	34807857	4772	1	-826	ENSBTAG00000003514	HSF4	heat shock transcription factor 4
chr18	34807362	34807720	diffreps_chr18_34807361_34807720	1.07	1.04e-05	9.29e-05	Promoter (<=1kb)	18	34808439	34812040	3602	1	-719	ENSBTAG00000003519	NOL3	nucleolar protein 3
chr18	34834902	34835160	diffreps_chr18_34834901_34835160	1.13	0.000481217	0.00289214	Promoter (<=1kb)	18	34834852	34839376	4525	1	50	ENSBTAG00000001286	ELMO3	engulfment and cell motility 3
chr18	35017802	35018280	diffreps_chr18_35017801_35018280	3.08	0	0	Exon (NM_001075747/517066, exon 4 of 4)	18	35017182	35027010	9829	2	8730	NA	ZDHHC1	zinc finger DHHC-type containing 1
chr18	35055222	35056680	diffreps_chr18_35055221_35056680	1.24	0	0	Intron (NM_174505/282148, intron 2 of 7)	18	35040378	35046067	5690	1	14844	ENSBTAG00000005685	HSD11B2	hydroxysteroid 11-beta dehydrogenase 2
chr18	35086282	35086620	diffreps_chr18_35086281_35086620	3.16	4e-15	1.55e-13	Promoter (<=1kb)	18	35086439	35087189	751	2	569	ENSBTAG00000014556	AGRP	agouti related neuropeptide
chr18	35131922	35132480	diffreps_chr18_35131921_35132480	1.06	1.63e-10	3.39e-09	Distal Intergenic	18	35149908	35189850	39943	1	-17428	ENSBTAG00000013757	CTCF	CCCTC-binding factor
chr18	35328962	35330460	diffreps_chr18_35328961_35330460	1.33	0	0	Promoter (1-2kb)	18	35266986	35327184	60199	2	-1778	ENSBTAG00000032763	RANBP10	RAN binding protein 10
chr18	35380002	35380760	diffreps_chr18_35380001_35380760	2.94	0	0	Distal Intergenic	18	35388086	35413319	25234	1	-7326	ENSBTAG00000018037	PSKH1	protein serine kinase H1
chr18	35380782	35381840	diffreps_chr18_35380781_35381840	1.04	0	0	Distal Intergenic	18	35388086	35413319	25234	1	-6246	ENSBTAG00000018037	PSKH1	protein serine kinase H1
chr18	35412002	35412320	diffreps_chr18_35412001_35412320	1.08	5.98e-05	0.000450396	3' UTR	18	35417755	35420306	2552	2	7986	ENSBTAG00000018040	PSMB10	proteasome 20S subunit beta 10
chr18	35457402	35457880	diffreps_chr18_35457401_35457880	1.05	2.08e-08	3.06e-07	Distal Intergenic	18	35425222	35447046	21825	2	-10356	ENSBTAG00000018045	SLC12A4	solute carrier family 12 member 4
chr18	36018522	36019160	diffreps_chr18_36018521_36019160	1.15	2.34e-10	4.7e-09	Distal Intergenic	18	36046775	36117670	70896	1	-27615	ENSBTAG00000015991	CDH1	cadherin 1
chr18	36133882	36134200	diffreps_chr18_36133881_36134200	1.05	0.000125717	0.00087685	Distal Intergenic	18	36046775	36117670	70896	1	87107	ENSBTAG00000015991	CDH1	cadherin 1
chr18	36326542	36326860	diffreps_chr18_36326541_36326860	1.23	6.53e-05	0.000486295	Intron (NM_001192867/286824, intron 1 of 2)	18	36323705	36329628	5924	1	2837	ENSBTAG00000050602	HAS3	hyaluronan synthase 3
chr18	36458662	36459020	diffreps_chr18_36458661_36459020	1.1	4.07e-05	0.000318905	Promoter (<=1kb)	18	36458178	36468906	10729	1	484	ENSBTAG00000001659	VPS4A	vacuolar protein sorting 4 homolog A
chr18	36850542	36851120	diffreps_chr18_36850541_36851120	1.14	5.71e-09	9.31e-08	Intron (NM_001083414/512457, intron 2 of 23)	18	36812458	36829147	16690	2	-21395	ENSBTAG00000020633	NOB1	NIN1 (RPN12) binding protein 1 homolog
chr18	38165642	38166520	diffreps_chr18_38165641_38166520	1.46	0	0	Distal Intergenic	18	39009921	39027609	17689	2	861089	ENSBTAG00000013265	DHX38	DEAH-box helicase 38
chr18	39443582	39444000	diffreps_chr18_39443581_39444000	1.46	3.4e-08	4.81e-07	Distal Intergenic	18	39421093	39435777	14685	2	-7805	ENSBTAG00000007544	MARVELD3	MARVEL domain containing 3
chr18	39655242	39655980	diffreps_chr18_39655241_39655980	2.36	0	0	Distal Intergenic	18	39673120	39702404	29285	2	46424	ENSBTAG00000001075	CALB2	calbindin 2
chr18	39702022	39702280	diffreps_chr18_39702021_39702280	1.24	9.23e-05	0.000663974	Promoter (<=1kb)	18	39673120	39702404	29285	2	124	ENSBTAG00000001075	CALB2	calbindin 2
chr18	40204102	40204520	diffreps_chr18_40204101_40204520	1.55	1.46e-09	2.59e-08	Distal Intergenic	18	40233528	40242996	9469	1	-29008	ENSBTAG00000002223	POP4	POP4 homolog, ribonuclease P/MRP subunit
chr18	40237062	40237680	diffreps_chr18_40237061_40237680	1.26	5.34e-12	1.38e-10	5' UTR	18	40233767	40242997	9231	1	3295	ENSBTAG00000002223	POP4	POP4 homolog, ribonuclease P/MRP subunit
chr18	40405722	40406000	diffreps_chr18_40405721_40406000	1.04	0.00107979	0.00585901	Distal Intergenic	18	40424330	40434828	10499	1	-18330	ENSBTAG00000004735	CCNE1	cyclin E1
chr18	41178062	41178420	diffreps_chr18_41178061_41178420	1.14	1.55e-06	1.62e-05	Distal Intergenic	18	40542851	40605026	62176	1	635211	ENSBTAG00000007559	URI1	URI1 prefoldin like chaperone
chr18	41178722	41179360	diffreps_chr18_41178721_41179360	1.83	0	0	Distal Intergenic	18	40542851	40605026	62176	1	635871	ENSBTAG00000007559	URI1	URI1 prefoldin like chaperone
chr18	43668402	43668680	diffreps_chr18_43668401_43668680	1.19	6.99e-05	0.000518007	Distal Intergenic	18	43644776	43660414	15639	2	-7988	ENSBTAG00000046544	SLC7A10	solute carrier family 7 member 10
chr18	43674222	43674820	diffreps_chr18_43674221_43674820	1.11	2.43e-11	5.71e-10	Distal Intergenic	18	43644776	43660414	15639	2	-13808	ENSBTAG00000046544	SLC7A10	solute carrier family 7 member 10
chr18	43836622	43836960	diffreps_chr18_43836621_43836960	1.03	3.1e-05	0.000249445	Intron (NM_001080318/615158, intron 11 of 14)	18	43805025	43811979	6955	1	31597	ENSBTAG00000017560	CEBPG	CCAAT enhancer binding protein gamma
chr18	44131642	44132280	diffreps_chr18_44131641_44132280	1.76	0	0	Intron (NM_001145992/100271926, intron 1 of 2)	18	44104449	44177803	73355	1	27193	ENSBTAG00000047670	CHST8	carbohydrate sulfotransferase 8
chr18	44133042	44133340	diffreps_chr18_44133041_44133340	3.17	6.98e-14	2.33e-12	Intron (NM_001145992/100271926, intron 1 of 2)	18	44104449	44177803	73355	1	28593	ENSBTAG00000047670	CHST8	carbohydrate sulfotransferase 8
chr18	44175802	44176140	diffreps_chr18_44175801_44176140	2.53	1.4e-12	3.93e-11	Exon (NM_001145992/100271926, exon 2 of 3)	18	44204451	44219002	14552	1	-28311	ENSBTAG00000017956	KCTD15	potassium channel tetramerization domain containing 15
chr18	44176922	44177720	diffreps_chr18_44176921_44177720	2.63	0	0	Exon (NM_001145992/100271926, exon 3 of 3)	18	44204451	44219002	14552	1	-26731	ENSBTAG00000017956	KCTD15	potassium channel tetramerization domain containing 15
chr18	45758202	45758640	diffreps_chr18_45758201_45758640	1.13	1.9e-07	2.36e-06	Exon (NM_001305021/507027, exon 8 of 20)	18	45748174	45767893	19720	1	10028	ENSBTAG00000003820	GRAMD1A	GRAM domain containing 1A
chr18	45785682	45786100	diffreps_chr18_45785681_45786100	1.05	1.51e-05	0.000130169	Intron (NM_001080241/508148, intron 2 of 12)	18	45782727	45802704	19978	1	2955	ENSBTAG00000003829	HPN	hepsin
chr18	45842822	45843440	diffreps_chr18_45842821_45843440	1.59	0	0	Promoter (<=1kb)	18	45844337	45850482	6146	1	-897	NA	FXYD3	FXYD domain containing ion transport regulator 3
chr18	45860802	45861720	diffreps_chr18_45860801_45861720	1.57	0	0	Promoter (<=1kb)	18	45851472	45860240	8769	2	-562	ENSBTAG00000017814	LGI4	leucine rich repeat LGI family member 4
chr18	45862582	45862820	diffreps_chr18_45862581_45862820	1.7	2.19e-06	2.22e-05	Promoter (1-2kb)	18	45864083	45868523	4441	1	-1263	ENSBTAG00000017816	FXYD1	FXYD domain containing ion transport regulator 1
chr18	46012222	46012720	diffreps_chr18_46012221_46012720	1.09	1.06e-07	1.38e-06	Intron (NM_001040570/540576, intron 7 of 11)	18	46002179	46018893	16715	1	10043	ENSBTAG00000017044	MAG	myelin associated glycoprotein
chr18	46343742	46344040	diffreps_chr18_46343741_46344040	2.54	1.34e-10	2.8e-09	Exon (NM_001101931/510660, exon 9 of 18)	18	46339517	46349810	10294	1	4225	ENSBTAG00000013436	HAUS5	HAUS augmin like complex subunit 5
chr18	46345062	46345260	diffreps_chr18_46345061_46345260	3.18	7.66e-10	1.41e-08	Exon (NM_001101931/510660, exon 14 of 18)	18	46339517	46349810	10294	1	5545	ENSBTAG00000013436	HAUS5	HAUS augmin like complex subunit 5
chr18	46729282	46729720	diffreps_chr18_46729281_46729720	1.15	1.07e-06	1.15e-05	Distal Intergenic	18	46703045	46717098	14054	2	-12184	ENSBTAG00000014995	THAP8	THAP domain containing 8
chr18	48043422	48044300	diffreps_chr18_48043421_48044300	1.49	0	0	Distal Intergenic	18	48026970	48034948	7979	2	-8474	ENSBTAG00000007216	DPF1	double PHD fingers 1
chr18	48062342	48063380	diffreps_chr18_48062341_48063380	1.32	0	0	Downstream (2-3kb)	18	48065738	48069952	4215	2	6572	ENSBTAG00000023472	PPP1R14A	protein phosphatase 1 regulatory inhibitor subunit 14A
chr18	48120062	48120540	diffreps_chr18_48120061_48120540	1.14	6.62e-08	8.91e-07	Promoter (1-2kb)	18	48119054	48119892	839	1	1008	ENSBTAG00000054406	C18H19orf33	chromosome 18 C19orf33 homolog
chr18	48120662	48120900	diffreps_chr18_48120661_48120900	2.59	6.82e-09	1.1e-07	Promoter (1-2kb)	18	48119054	48119892	839	1	1608	ENSBTAG00000054406	C18H19orf33	chromosome 18 C19orf33 homolog
chr18	48916982	48917300	diffreps_chr18_48916981_48917300	1.04	6.24e-05	0.000468046	Distal Intergenic	18	48968074	48969441	1368	1	-50774	ENSBTAG00000050296	IFNL3	interferon lambda 3
chr18	49038422	49038940	diffreps_chr18_49038421_49038940	1.33	1.79e-10	3.67e-09	3' UTR	18	49038393	49043303	4911	2	4363	ENSBTAG00000005390	GMFG	glia maturation factor gamma
chr18	49156442	49156820	diffreps_chr18_49156441_49156820	1.06	3.68e-06	3.58e-05	Exon (NM_001083439/519808, exon 26 of 29)	18	49160944	49168043	7100	1	-4124	ENSBTAG00000010480	TIMM50	translocase of inner mitochondrial membrane 50
chr18	49175482	49175840	diffreps_chr18_49175481_49175840	1.42	5.94e-07	6.69e-06	Exon (NM_001192080/505993, exon 4 of 9)	18	49172884	49180410	7527	1	2598	ENSBTAG00000010483	DLL3	delta like canonical Notch ligand 3
chr18	49184462	49184660	diffreps_chr18_49184461_49184660	1.45	0.000179657	0.00120466	Promoter (<=1kb)	18	49184744	49190099	5356	1	-84	ENSBTAG00000010501	SELENOV	selenoprotein V
chr18	49406122	49406440	diffreps_chr18_49406121_49406440	2.28	3.04e-10	6.02e-09	Distal Intergenic	18	49388469	49400788	12320	2	-5334	ENSBTAG00000002579	FBL	fibrillarin
chr18	49828682	49828960	diffreps_chr18_49828681_49828960	1.25	0.000130497	0.000903026	Exon (NM_001192910/537578, exon 13 of 35)	18	49802133	49879370	77238	1	26549	ENSBTAG00000004751	SPTBN4	spectrin beta, non-erythrocytic 4
chr18	49898282	49898980	diffreps_chr18_49898281_49898980	1.01	1.68e-11	4.03e-10	Distal Intergenic	18	49880443	49892722	12280	1	17839	ENSBTAG00000004755	SHKBP1	SH3KBP1 binding protein 1
chr18	49946482	49946820	diffreps_chr18_49946481_49946820	1.04	8.89e-05	0.000642989	Downstream (2-3kb)	18	49949051	49973876	24826	2	27056	ENSBTAG00000019461	NUMBL	NUMB like endocytic adaptor protein
chr18	49956122	49956320	diffreps_chr18_49956121_49956320	2.77	1.01e-08	1.57e-07	Intron (NM_001076834/510973, intron 7 of 9)	18	49949051	49973876	24826	2	17556	ENSBTAG00000019461	NUMBL	NUMB like endocytic adaptor protein
chr18	50390022	50390520	diffreps_chr18_50390021_50390520	1.3	1.69e-08	2.53e-07	Intron (NM_001100366/514971, intron 7 of 8)	18	50379687	50393568	13882	1	10335	ENSBTAG00000018240	CYP2S1	cytochrome P450, family 2, subfamily S, polypeptide 1
chr18	50509442	50509780	diffreps_chr18_50509441_50509780	2.67	5.84e-13	1.74e-11	Promoter (1-2kb)	18	50493209	50508088	14880	2	-1354	ENSBTAG00000020457	TGFB1	transforming growth factor beta 1
chr18	50695622	50696140	diffreps_chr18_50695621_50696140	1.57	3.53e-12	9.4e-11	Distal Intergenic	18	50818050	50836107	18058	1	-121910	ENSBTAG00000005615	CEACAM1	carcinoembryonic antigen related cell adhesion molecule 1
chr18	50698582	50698840	diffreps_chr18_50698581_50698840	3.01	8.24e-11	1.79e-09	Distal Intergenic	18	50818050	50836107	18058	1	-119210	ENSBTAG00000005615	CEACAM1	carcinoembryonic antigen related cell adhesion molecule 1
chr18	50725162	50725420	diffreps_chr18_50725161_50725420	4.01	1.73e-13	5.49e-12	Distal Intergenic	18	50818050	50836107	18058	1	-92630	ENSBTAG00000005615	CEACAM1	carcinoembryonic antigen related cell adhesion molecule 1
chr18	50754722	50756520	diffreps_chr18_50754721_50756520	1.75	0	0	Distal Intergenic	18	50818050	50836107	18058	1	-61530	ENSBTAG00000005615	CEACAM1	carcinoembryonic antigen related cell adhesion molecule 1
chr18	50807082	50807500	diffreps_chr18_50807081_50807500	1.66	1.43e-10	2.98e-09	Distal Intergenic	18	50818050	50836107	18058	1	-10550	ENSBTAG00000005615	CEACAM1	carcinoembryonic antigen related cell adhesion molecule 1
chr18	50815542	50816440	diffreps_chr18_50815541_50816440	1.96	0	0	Promoter (1-2kb)	18	50818050	50836107	18058	1	-1610	ENSBTAG00000005615	CEACAM1	carcinoembryonic antigen related cell adhesion molecule 1
chr18	50816642	50817500	diffreps_chr18_50816641_50817500	1.29	0	0	Promoter (<=1kb)	18	50818050	50836107	18058	1	-550	ENSBTAG00000005615	CEACAM1	carcinoembryonic antigen related cell adhesion molecule 1
chr18	50869802	50870200	diffreps_chr18_50869801_50870200	2.34	8.44e-14	2.77e-12	Distal Intergenic	18	50895719	50907094	11376	1	-25519	ENSBTAG00000038321	LIPE	lipase E, hormone sensitive type
chr18	51131582	51132060	diffreps_chr18_51131581_51132060	1.93	1.27e-13	4.1e-12	Distal Intergenic	18	51171396	51176789	5394	2	44729	ENSBTAG00000021789	ZNF574	zinc finger protein 574
chr18	51132262	51133000	diffreps_chr18_51132261_51133000	1.03	4.66e-15	1.8e-13	Distal Intergenic	18	51171396	51176789	5394	2	43789	ENSBTAG00000021789	ZNF574	zinc finger protein 574
chr18	51152542	51153360	diffreps_chr18_51152541_51153360	1.75	0	0	Distal Intergenic	18	51171396	51176789	5394	2	23429	ENSBTAG00000021789	ZNF574	zinc finger protein 574
chr18	51159722	51161800	diffreps_chr18_51159721_51161800	1.13	0	0	Distal Intergenic	18	51171396	51176789	5394	2	14989	ENSBTAG00000021789	ZNF574	zinc finger protein 574
chr18	51244742	51244960	diffreps_chr18_51244741_51244960	2.21	1.34e-07	1.7e-06	Exon (NM_001046424/537698, exon 13 of 13)	18	51274070	51276954	2885	1	-29110	ENSBTAG00000018633	RABAC1	Rab acceptor 1
chr18	51245842	51246200	diffreps_chr18_51245841_51246200	3.17	1.11e-16	5.11e-15	3' UTR	18	51274070	51276954	2885	1	-27870	ENSBTAG00000018633	RABAC1	Rab acceptor 1
chr18	51268222	51268560	diffreps_chr18_51268221_51268560	3.46	4.44e-16	1.93e-14	Distal Intergenic	18	51274070	51276954	2885	1	-5510	ENSBTAG00000018633	RABAC1	Rab acceptor 1
chr18	51274542	51275400	diffreps_chr18_51274541_51275400	1.1	8.88e-16	3.74e-14	Promoter (<=1kb)	18	51274070	51276954	2885	1	472	ENSBTAG00000018633	RABAC1	Rab acceptor 1
chr18	51279922	51280800	diffreps_chr18_51279921_51280800	1.09	0	0	Distal Intergenic	18	51274070	51276954	2885	1	5852	ENSBTAG00000018633	RABAC1	Rab acceptor 1
chr18	51298582	51299680	diffreps_chr18_51298581_51299680	1.17	0	0	Distal Intergenic	18	51274070	51276954	2885	1	24512	ENSBTAG00000018633	RABAC1	Rab acceptor 1
chr18	51352202	51352960	diffreps_chr18_51352201_51352960	1.32	1.33e-15	5.52e-14	Downstream (2-3kb)	18	51344685	51348374	3690	2	-3828	ENSBTAG00000001882	CD79A	CD79a molecule
chr18	51429842	51430080	diffreps_chr18_51429841_51430080	3.25	1.83e-10	3.73e-09	Distal Intergenic	18	51373358	51382928	9571	1	56484	ENSBTAG00000020251	LYPD4	LY6/PLAUR domain containing 4
chr18	51430882	51431520	diffreps_chr18_51430881_51431520	1.47	1.11e-16	5.11e-15	Distal Intergenic	18	51373358	51382928	9571	1	57524	ENSBTAG00000020251	LYPD4	LY6/PLAUR domain containing 4
chr18	51493022	51493720	diffreps_chr18_51493021_51493720	1.14	3.4e-13	1.05e-11	Distal Intergenic	18	51500304	51506868	6565	2	13148	ENSBTAG00000018652	CXCL17	C-X-C motif chemokine ligand 17
chr18	51637442	51637660	diffreps_chr18_51637441_51637660	1.05	0.00153787	0.00795018	Distal Intergenic	18	51618421	51622953	4533	1	19021	ENSBTAG00000023434	BSP1	binder of sperm 1
chr18	51771622	51772180	diffreps_chr18_51771621_51772180	1.12	8.57e-09	1.35e-07	Distal Intergenic	18	51737213	51738760	1548	1	34409	ENSBTAG00000030939	ZNF575	zinc finger protein 575
chr18	51947202	51948180	diffreps_chr18_51947201_51948180	1.57	0	0	Exon (NM_001046559/615492, exon 6 of 14)	18	51935739	51956086	20348	2	7906	ENSBTAG00000011815	SMG9	SMG9 nonsense mediated mRNA decay factor
chr18	51948582	51948920	diffreps_chr18_51948581_51948920	2.39	6.29e-11	1.39e-09	Intron (NM_001046559/615492, intron 5 of 13)	18	51935739	51956086	20348	2	7166	ENSBTAG00000011815	SMG9	SMG9 nonsense mediated mRNA decay factor
chr18	51965442	51966880	diffreps_chr18_51965441_51966880	1.92	0	0	3' UTR	18	51935739	51956086	20348	2	-9356	ENSBTAG00000011815	SMG9	SMG9 nonsense mediated mRNA decay factor
chr18	51984082	51984840	diffreps_chr18_51984081_51984840	1.01	4.36e-12	1.14e-10	Distal Intergenic	18	51965947	51979728	13782	2	-4354	ENSBTAG00000004588	KCNN4	potassium calcium-activated channel subfamily N member 4
chr18	52356322	52356920	diffreps_chr18_52356321_52356920	1.07	2.52e-09	4.33e-08	Distal Intergenic	18	52297791	52324434	26644	2	-31888	ENSBTAG00000006805	ZNF180	zinc finger protein 180
chr18	52469362	52470780	diffreps_chr18_52469361_52470780	1.04	0	0	Distal Intergenic	18	52447152	52465531	18380	1	22210	ENSBTAG00000015313	CEACAM19	CEA cell adhesion molecule 19
chr18	52499782	52501340	diffreps_chr18_52499781_52501340	1.13	0	0	Distal Intergenic	18	52520139	52529472	9334	1	-18799	ENSBTAG00000009493	BCL3	BCL3 transcription coactivator
chr18	52619902	52621340	diffreps_chr18_52619901_52621340	1.83	0	0	Promoter (<=1kb)	18	52619205	52630580	11376	1	697	ENSBTAG00000001781	TOMM40	translocase of outer mitochondrial membrane 40
chr18	52633062	52633620	diffreps_chr18_52633061_52633620	1.31	6.76e-11	1.49e-09	Distal Intergenic	18	52637890	52640576	2687	1	-4270	ENSBTAG00000010123	APOE	apolipoprotein E
chr18	52635022	52635460	diffreps_chr18_52635021_52635460	1.4	1.57e-09	2.78e-08	Distal Intergenic	18	52637890	52640576	2687	1	-2430	ENSBTAG00000010123	APOE	apolipoprotein E
chr18	52666222	52666520	diffreps_chr18_52666221_52666520	1.12	0.000164986	0.00111784	Intron (NM_001046613/618037, intron 1 of 13)	18	52663768	52691346	27579	1	2454	ENSBTAG00000020560	CLPTM1	CLPTM1 regulator of GABA type A receptor forward trafficking
chr18	52737242	52738760	diffreps_chr18_52737241_52738760	1.37	0	0	Exon (NM_001077887/509208, exon 8 of 21)	18	52724382	52749206	24825	1	12860	ENSBTAG00000013697	CLASRP	CLK4 associating serine/arginine rich protein
chr18	52796202	52796860	diffreps_chr18_52796201_52796860	2.51	0	0	Exon (NM_001105379/516932, exon 3 of 13)	18	52806783	52814457	7675	2	17597	ENSBTAG00000020074	NKPD1	NTPase KAP family P-loop domain containing 1
chr18	52921702	52921980	diffreps_chr18_52921701_52921980	2.56	7.01e-11	1.54e-09	Promoter (1-2kb)	18	52923109	52953009	29901	1	-1129	ENSBTAG00000002682	MARK4	microtubule affinity regulating kinase 4
chr18	52933662	52933960	diffreps_chr18_52933661_52933960	1.13	0.000113381	0.000799767	Intron (NM_001035359/525675, intron 7 of 13)	18	52923109	52953009	29901	1	10553	ENSBTAG00000002682	MARK4	microtubule affinity regulating kinase 4
chr18	53079822	53080260	diffreps_chr18_53079821_53080260	1.07	4.44e-07	5.13e-06	3' UTR	18	53074888	53081311	6424	1	4934	ENSBTAG00000008182	FOSB	FosB proto-oncogene, AP-1 transcription factor subunit
chr18	53084522	53085720	diffreps_chr18_53084521_53085720	1.7	0	0	Downstream (1-2kb)	18	53087292	53092298	5007	2	6578	ENSBTAG00000008185	RTN2	reticulon 2
chr18	53201582	53202520	diffreps_chr18_53201581_53202520	1.41	0	0	Distal Intergenic	18	53188837	53190580	1744	2	-11002	ENSBTAG00000018398	GPR4	G protein-coupled receptor 4
chr18	53215302	53216540	diffreps_chr18_53215301_53216540	1.2	0	0	Distal Intergenic	18	53226503	53226596	94	2	10056	ENSBTAG00000029933	MIR330	microRNA mir-330
chr18	53216562	53217020	diffreps_chr18_53216561_53217020	3.07	0	0	Distal Intergenic	18	53226503	53226596	94	2	9576	ENSBTAG00000029933	MIR330	microRNA mir-330
chr18	53228242	53230180	diffreps_chr18_53228241_53230180	1.01	0	0	Promoter (1-2kb)	18	53226503	53226596	94	2	-1646	ENSBTAG00000029933	MIR330	microRNA mir-330
chr18	53235722	53235940	diffreps_chr18_53235721_53235940	2.77	1.13e-09	2.04e-08	Distal Intergenic	18	53226503	53226596	94	2	-9126	ENSBTAG00000029933	MIR330	microRNA mir-330
chr18	53236482	53236960	diffreps_chr18_53236481_53236960	1.28	4.3e-09	7.15e-08	Distal Intergenic	18	53226503	53226596	94	2	-9886	ENSBTAG00000029933	MIR330	microRNA mir-330
chr18	53248862	53249220	diffreps_chr18_53248861_53249220	1.02	2.21e-05	0.000183478	Distal Intergenic	18	53253428	53256287	2860	2	7067	ENSBTAG00000012177	SNRPD2	small nuclear ribonucleoprotein D2 polypeptide
chr18	53257382	53258780	diffreps_chr18_53257381_53258780	1.05	0	0	Promoter (<=1kb)	18	53257089	53263007	5919	1	293	ENSBTAG00000012176	QPCTL	glutaminyl-peptide cyclotransferase like
chr18	53333562	53335120	diffreps_chr18_53333561_53335120	1.31	0	0	Distal Intergenic	18	53305388	53309473	4086	2	-24089	ENSBTAG00000013346	SIX5	SIX homeobox 5
chr18	53351542	53351820	diffreps_chr18_53351541_53351820	2.89	8.39e-12	2.1e-10	Exon (NM_001206913/100337373, exon 25 of 27)	18	53350775	53380309	29535	2	28489	ENSBTAG00000012101	SYMPK	symplekin
chr18	53352842	53353080	diffreps_chr18_53352841_53353080	1.91	1.62e-06	1.68e-05	Intron (NM_001206913/100337373, intron 22 of 25)	18	53350775	53380309	29535	2	27229	ENSBTAG00000012101	SYMPK	symplekin
chr18	53398282	53398800	diffreps_chr18_53398281_53398800	1.28	7.16e-10	1.34e-08	Distal Intergenic	18	53384980	53391520	6541	1	13302	ENSBTAG00000012104	FOXA3	forkhead box A3
chr18	53400902	53401200	diffreps_chr18_53400901_53401200	1.4	2.91e-05	0.000235089	Distal Intergenic	18	53384980	53391520	6541	1	15922	ENSBTAG00000012104	FOXA3	forkhead box A3
chr18	53511102	53511300	diffreps_chr18_53511101_53511300	2.07	1.47e-06	1.53e-05	Downstream (2-3kb)	18	53513498	53513616	119	1	-2198	ENSBTAG00000030108	MIR769	microRNA mir-769
chr18	53525822	53526500	diffreps_chr18_53525821_53526500	1.13	7.99e-15	3e-13	Distal Intergenic	18	53513719	53515780	2062	2	-10042	ENSBTAG00000002635	PGLYRP1	peptidoglycan recognition protein 1
chr18	53549622	53550740	diffreps_chr18_53549621_53550740	1.09	0	0	Distal Intergenic	18	53558986	53590524	31539	1	-8246	ENSBTAG00000018948	HIF3A	hypoxia inducible factor 3 subunit alpha
chr18	53627462	53629380	diffreps_chr18_53627461_53629380	1.08	0	0	Distal Intergenic	18	53647296	53651183	3888	1	-17916	ENSBTAG00000009337	PNMA8A	PNMA family member 8A
chr18	53706202	53707280	diffreps_chr18_53706201_53707280	1.23	0	0	Distal Intergenic	18	53691938	53694560	2623	1	14264	ENSBTAG00000018181	CCDC8	coiled-coil domain containing 8
chr18	53714702	53715120	diffreps_chr18_53714701_53715120	1.35	1.89e-08	2.81e-07	Distal Intergenic	18	53737061	53746135	9075	1	-21941	ENSBTAG00000014583	CALM3	calmodulin 3
chr18	53749282	53749840	diffreps_chr18_53749281_53749840	1.6	5.15e-14	1.76e-12	Distal Intergenic	18	53753076	53755284	2209	2	5444	ENSBTAG00000014585	PTGIR	prostaglandin I2 receptor
chr18	53764722	53766000	diffreps_chr18_53764721_53766000	1.48	0	0	Promoter (1-2kb)	18	53762489	53763073	585	2	-1649	ENSBTAG00000017762	GNG8	G protein subunit gamma 8
chr18	53855582	53858200	diffreps_chr18_53855581_53858200	1.54	0	0	5' UTR	18	53849380	53859526	10147	1	6202	ENSBTAG00000050243	FKRP	fukutin related protein
chr18	53926302	53927520	diffreps_chr18_53926301_53927520	1.94	0	0	Exon (NM_001076078/536553, exon 3 of 5)	18	53925658	53935293	9636	2	7773	ENSBTAG00000010584	AP2S1	adaptor related protein complex 2 subunit sigma 1
chr18	54051902	54052280	diffreps_chr18_54051901_54052280	1.09	7.03e-06	6.48e-05	Intron (NM_001192398/540310, intron 4 of 5)	18	54078441	54094359	15919	1	-26161	ENSBTAG00000015576	NPAS1	neuronal PAS domain protein 1
chr18	54069502	54070180	diffreps_chr18_54069501_54070180	1.35	0	0	Distal Intergenic	18	54078441	54094359	15919	1	-8261	ENSBTAG00000015576	NPAS1	neuronal PAS domain protein 1
chr18	54086902	54087400	diffreps_chr18_54086901_54087400	3.75	0	0	Intron (NM_001192657/528272, intron 4 of 10)	18	54078441	54094359	15919	1	8461	ENSBTAG00000015576	NPAS1	neuronal PAS domain protein 1
chr18	54182562	54183100	diffreps_chr18_54182561_54183100	3.3	0	0	Intron (NM_001081711/505512, intron 1 of 8)	18	54170225	54232459	62235	1	12337	ENSBTAG00000002676	SAE1	SUMO1 activating enzyme subunit 1
chr18	54183142	54184700	diffreps_chr18_54183141_54184700	1.28	0	0	Exon (NM_001081711/505512, exon 2 of 9)	18	54170225	54232459	62235	1	12917	ENSBTAG00000002676	SAE1	SUMO1 activating enzyme subunit 1
chr18	54242862	54243620	diffreps_chr18_54242861_54243620	2.63	0	0	Distal Intergenic	18	54269220	54279893	10674	1	-25600	ENSBTAG00000014117	CCDC9	coiled-coil domain containing 9
chr18	54243722	54244480	diffreps_chr18_54243721_54244480	2.69	0	0	Distal Intergenic	18	54269220	54279893	10674	1	-24740	ENSBTAG00000014117	CCDC9	coiled-coil domain containing 9
chr18	54256142	54258380	diffreps_chr18_54256141_54258380	1.53	0	0	Distal Intergenic	18	54269220	54279893	10674	1	-10840	ENSBTAG00000014117	CCDC9	coiled-coil domain containing 9
chr18	54287862	54288420	diffreps_chr18_54287861_54288420	1.19	2.33e-11	5.47e-10	Distal Intergenic	18	54269220	54279893	10674	1	18642	ENSBTAG00000014117	CCDC9	coiled-coil domain containing 9
chr18	54414722	54415120	diffreps_chr18_54414721_54415120	1.03	6.73e-07	7.5e-06	Distal Intergenic	18	54386162	54397080	10919	2	-17642	ENSBTAG00000006862	MEIS3	Meis homeobox 3
chr18	54624262	54625040	diffreps_chr18_54624261_54625040	1.06	1.75e-13	5.55e-12	Distal Intergenic	18	54627996	54646687	18692	1	-2956	ENSBTAG00000021191	EHD2	EH domain containing 2
chr18	54627122	54627800	diffreps_chr18_54627121_54627800	1.52	2.22e-16	9.84e-15	Promoter (<=1kb)	18	54627996	54646687	18692	1	-196	ENSBTAG00000021191	EHD2	EH domain containing 2
chr18	54788142	54788340	diffreps_chr18_54788141_54788340	1.6	5.5e-05	0.000417991	Distal Intergenic	18	54731843	54750238	18396	2	-37904	ENSBTAG00000023419	SULT2A1	sulfotransferase family, cytosolic, 2A, dehydroepiandrosterone (DHEA)-preferring, member 1
chr18	54921362	54922080	diffreps_chr18_54921361_54922080	1.65	1.11e-16	5.11e-15	Distal Intergenic	18	54865684	54892935	27252	2	-28427	ENSBTAG00000014595	LIG1	DNA ligase 1
chr18	54925622	54926360	diffreps_chr18_54925621_54926360	1.37	2.04e-14	7.32e-13	Distal Intergenic	18	54865684	54892935	27252	2	-32687	ENSBTAG00000014595	LIG1	DNA ligase 1
chr18	55032842	55033540	diffreps_chr18_55032841_55033540	1.44	2.22e-16	9.84e-15	Distal Intergenic	18	55038414	55042752	4339	1	-4874	ENSBTAG00000018013	EMP3	epithelial membrane protein 3
chr18	55033702	55034360	diffreps_chr18_55033701_55034360	1.33	3.33e-15	1.32e-13	Distal Intergenic	18	55038414	55042752	4339	1	-4054	ENSBTAG00000018013	EMP3	epithelial membrane protein 3
chr18	55137042	55137360	diffreps_chr18_55137041_55137360	1.01	0.000261725	0.0016819	Promoter (<=1kb)	18	55136649	55139932	3284	1	393	ENSBTAG00000000082	KCNJ14	potassium inwardly rectifying channel subfamily J member 14
chr18	55236862	55237140	diffreps_chr18_55236861_55237140	1.12	7.96e-05	0.00058216	Intron (NM_001081726/531192, intron 2 of 6)	18	55252155	55253025	871	1	-15015	ENSBTAG00000048127	SPACA4	sperm acrosome associated 4
chr18	55370602	55370800	diffreps_chr18_55370601_55370800	2.77	1.01e-08	1.57e-07	Promoter (1-2kb)	18	55359100	55372707	13608	2	1907	ENSBTAG00000011619	RASIP1	Ras interacting protein 1
chr18	55383522	55384620	diffreps_chr18_55383521_55384620	1.45	0	0	Distal Intergenic	18	55377395	55380912	3518	2	-2610	ENSBTAG00000023374	FUT1	fucosyltransferase 1
chr18	55422302	55423160	diffreps_chr18_55422301_55423160	1.67	0	0	Promoter (1-2kb)	18	55411008	55425020	14013	2	1860	ENSBTAG00000009172	BCAT2	branched chain amino acid transaminase 2
chr18	55453422	55454240	diffreps_chr18_55453421_55454240	1.23	4e-15	1.55e-13	Intron (NM_001205683/510748, intron 15 of 18)	18	55427060	55447469	20410	2	-5953	ENSBTAG00000009174	HSD17B14	hydroxysteroid 17-beta dehydrogenase 14
chr18	55458522	55458900	diffreps_chr18_55458521_55458900	1.02	9.01e-05	0.000650821	Exon (NM_001205683/510748, exon 14 of 19)	18	55427060	55447469	20410	2	-11053	ENSBTAG00000009174	HSD17B14	hydroxysteroid 17-beta dehydrogenase 14
chr18	55494562	55496040	diffreps_chr18_55494561_55496040	1.03	0	0	Intron (NM_001075199/505351, intron 5 of 12)	18	55487483	55503526	16044	1	7079	ENSBTAG00000002378	NUCB1	nucleobindin 1
chr18	55544122	55544480	diffreps_chr18_55544121_55544480	2.7	3.44e-14	1.19e-12	Exon (NM_001101299/786335, exon 13 of 16)	18	55538469	55540367	1899	1	5653	ENSBTAG00000013343	FTL	ferritin light chain
chr18	55715622	55715820	diffreps_chr18_55715621_55715820	2.45	9.11e-08	1.19e-06	Distal Intergenic	18	55653319	55657821	4503	2	-57801	ENSBTAG00000002853	HRC	histidine rich calcium binding protein
chr18	55854962	55855320	diffreps_chr18_55854961_55855320	1.34	2.47e-06	2.48e-05	Promoter (<=1kb)	18	55855244	55879475	24232	1	0	ENSBTAG00000008614	KASH5	KASH domain containing 5
chr18	55928622	55929460	diffreps_chr18_55928621_55929460	1.77	0	0	Promoter (<=1kb)	18	55930050	55939492	9443	1	-590	ENSBTAG00000038045	FLT3LG	fms related receptor tyrosine kinase 3 ligand
chr18	55948402	55949320	diffreps_chr18_55948401_55949320	1.01	1.91e-14	6.86e-13	Promoter (1-2kb)	18	55950499	55952929	2431	1	-1179	ENSBTAG00000013924	RPS11	ribosomal protein S11
chr18	55995262	55995640	diffreps_chr18_55995261_55995640	1.24	3.45e-06	3.37e-05	Intron (NM_001075502/511234, intron 1 of 8)	18	55990004	56002003	12000	2	6363	ENSBTAG00000014450	NOSIP	nitric oxide synthase interacting protein
chr18	55996162	55996520	diffreps_chr18_55996161_55996520	4.27	0	0	Intron (NM_001075502/511234, intron 1 of 8)	18	55990004	56002003	12000	2	5483	ENSBTAG00000014450	NOSIP	nitric oxide synthase interacting protein
chr18	56072682	56074800	diffreps_chr18_56072681_56074800	1.3	0	0	Exon (NM_001101148/533338, exon 6 of 7)	18	56068168	56075230	7063	1	4514	ENSBTAG00000006638	BCL2L12	BCL2 like 12
chr18	56144602	56145240	diffreps_chr18_56144601_56145240	1.11	4.34e-12	1.14e-10	Intron (NM_001191440/784636, intron 1 of 23)	18	56137712	56165604	27893	1	6890	ENSBTAG00000019180	AP2A1	adaptor related protein complex 2 subunit alpha 1
chr18	56482162	56482600	diffreps_chr18_56482161_56482600	1.3	5.04e-08	6.91e-07	Distal Intergenic	18	56541106	56547750	6645	1	-58506	ENSBTAG00000003264	NR1H2	nuclear receptor subfamily 1 group H member 2
chr18	56569422	56569860	diffreps_chr18_56569421_56569860	1.45	7.93e-09	1.26e-07	Exon (NM_174427/281990, exon 20 of 27)	18	56573188	56579354	6167	1	-3328	ENSBTAG00000043953	SPIB	Spi-B transcription factor
chr18	56582802	56583340	diffreps_chr18_56582801_56583340	1.3	3.06e-10	6.06e-09	Distal Intergenic	18	56573188	56579354	6167	1	9614	ENSBTAG00000043953	SPIB	Spi-B transcription factor
chr18	56609222	56609740	diffreps_chr18_56609221_56609740	1.14	8.05e-09	1.28e-07	Intron (NM_001205375/617892, intron 3 of 4)	18	56607998	56613478	5481	2	3738	ENSBTAG00000020082	FAM71E1	family with sequence similarity 71 member E1
chr18	56992822	56993220	diffreps_chr18_56992821_56993220	1.11	4.12e-07	4.78e-06	Promoter (1-2kb)	18	56989035	56995008	5974	2	1788	ENSBTAG00000015129	KLK10	kallikrein related peptidase 10
chr18	57289982	57290560	diffreps_chr18_57289981_57290560	2.55	0	0	Intron (NM_001319887/100336984, intron 1 of 6)	18	57219130	57343755	124626	2	53195	ENSBTAG00000037710	LOC100336984	zinc finger protein 331
chr18	57291862	57293400	diffreps_chr18_57291861_57293400	1.71	0	0	Intron (NM_001319887/100336984, intron 1 of 6)	18	57219130	57343755	124626	2	50355	ENSBTAG00000037710	LOC100336984	zinc finger protein 331
chr18	57306762	57307300	diffreps_chr18_57306761_57307300	1.67	7.29e-13	2.14e-11	Intron (NM_001319887/100336984, intron 1 of 6)	18	57219130	57343755	124626	2	36455	ENSBTAG00000037710	LOC100336984	zinc finger protein 331
chr18	57308702	57309260	diffreps_chr18_57308701_57309260	1.34	1.17e-13	3.8e-12	Intron (NM_001319887/100336984, intron 1 of 6)	18	57219130	57343755	124626	2	34495	ENSBTAG00000037710	LOC100336984	zinc finger protein 331
chr18	5795742	5796100	diffreps_chr18_5795741_5796100	1.02	3.14e-05	0.000252193	Intron (NM_001078092/618792, intron 8 of 8)	18	5574524	5574603	80	1	221218	NA	MIR2285AL	microRNA mir-2285al
chr18	61538302	61539140	diffreps_chr18_61538301_61539140	1.45	0	0	Distal Intergenic	18	61573948	61579535	5588	1	-34808	ENSBTAG00000018152	MYADM	myeloid associated differentiation marker
chr18	61539342	61539680	diffreps_chr18_61539341_61539680	1.3	8.74e-06	7.92e-05	Distal Intergenic	18	61573948	61579535	5588	1	-34268	ENSBTAG00000018152	MYADM	myeloid associated differentiation marker
chr18	61724622	61725020	diffreps_chr18_61724621_61725020	1.45	3.69e-08	5.19e-07	Distal Intergenic	18	61698114	61717831	19718	2	-6791	ENSBTAG00000002596	VSTM1	V-set and transmembrane domain containing 1
chr18	61725062	61725560	diffreps_chr18_61725061_61725560	3.5	0	0	Distal Intergenic	18	61698114	61717831	19718	2	-7231	ENSBTAG00000002596	VSTM1	V-set and transmembrane domain containing 1
chr18	62028122	62029000	diffreps_chr18_62028121_62029000	1.36	0	0	5' UTR	18	62025056	62031537	6482	2	2537	ENSBTAG00000038034	ZNF628	zinc finger protein 628
chr18	62038462	62039500	diffreps_chr18_62038461_62039500	1.72	0	0	Distal Intergenic	18	62025056	62031537	6482	2	-6925	ENSBTAG00000038034	ZNF628	zinc finger protein 628
chr18	62040662	62041040	diffreps_chr18_62040661_62041040	1.18	8.39e-06	7.62e-05	Distal Intergenic	18	62025056	62031537	6482	2	-9125	ENSBTAG00000038034	ZNF628	zinc finger protein 628
chr18	62082442	62083140	diffreps_chr18_62082441_62083140	1.03	1.52e-12	4.25e-11	Distal Intergenic	18	62089250	62093135	3886	1	-6110	ENSBTAG00000009211	UBE2S	ubiquitin conjugating enzyme E2 S
chr18	62107542	62108000	diffreps_chr18_62107541_62108000	1.42	9.24e-09	1.45e-07	Promoter (<=1kb)	18	62107591	62108637	1047	2	637	ENSBTAG00000021057	TMEM190	transmembrane protein 190
chr18	62118222	62118600	diffreps_chr18_62118221_62118600	1.05	6.19e-05	0.00046439	Intron (NM_001114507/NM_001114507, intron 2 of 4)	18	62124771	62126264	1494	1	-6171	ENSBTAG00000007200	COX6B2	cytochrome c oxidase subunit 6B2
chr18	62176822	62177920	diffreps_chr18_62176821_62177920	1.1	0	0	Intron (NM_001114507/NM_001114507, intron 2 of 4)	18	62160005	62167315	7311	1	16817	ENSBTAG00000022813	TMEM150B	transmembrane protein 150B
chr18	62178102	62178580	diffreps_chr18_62178101_62178580	1.03	1.19e-07	1.53e-06	Intron (NM_001114507/NM_001114507, intron 2 of 4)	18	62195503	62205660	10158	1	-16923	ENSBTAG00000003644	HSPBP1	HSPA (Hsp70) binding protein 1
chr18	62280022	62280260	diffreps_chr18_62280021_62280260	2.2	5.35e-08	7.31e-07	Exon (NM_174474/282095, exon 6 of 13)	18	62276440	62285805	9366	1	3582	ENSBTAG00000006419	TNNT1	troponin T1, slow skeletal type
chr18	62280522	62281120	diffreps_chr18_62280521_62281120	1.66	4.33e-15	1.68e-13	Exon (NM_174474/282095, exon 7 of 13)	18	62276440	62285805	9366	1	4082	ENSBTAG00000006419	TNNT1	troponin T1, slow skeletal type
chr18	62353562	62353820	diffreps_chr18_62353561_62353820	1.79	1.61e-06	1.67e-05	3' UTR	18	62338040	62355023	16984	1	15522	ENSBTAG00000030393	RDH13	retinol dehydrogenase 13
chr18	62821682	62822220	diffreps_chr18_62821681_62822220	1.02	8.59e-08	1.13e-06	Distal Intergenic	18	62846574	62846640	67	2	24420	NA	MIR574	microRNA mir-574
chr18	63231442	63231740	diffreps_chr18_63231441_63231740	2.23	1.03e-09	1.88e-08	Intron (NM_001110440/512610, intron 2 of 13)	18	63227968	63238067	10100	1	3474	ENSBTAG00000020062	TMC4	transmembrane channel like 4
chr18	63237222	63237420	diffreps_chr18_63237221_63237420	1.38	0.000309643	0.0019544	Promoter (1-2kb)	18	63238454	63241751	3298	1	-1034	ENSBTAG00000023333	LENG1	leukocyte receptor cluster member 1
chr18	63494502	63495160	diffreps_chr18_63494501_63495160	1.05	7.81e-12	1.97e-10	Downstream (2-3kb)	18	63497487	63505095	7609	2	9935	ENSBTAG00000002904	ZNF787	zinc finger protein 787
chr18	65212822	65213080	diffreps_chr18_65212821_65213080	1.28	5.75e-05	0.000434871	Distal Intergenic	18	65374899	65406255	31357	1	-161819	ENSBTAG00000039946	ZNF814	zinc finger protein 814
chr18	8431242	8431440	diffreps_chr18_8431241_8431440	2.45	9.11e-08	1.19e-06	Distal Intergenic	18	8544509	8557022	12514	2	125582	ENSBTAG00000018394	SDR42E1	short chain dehydrogenase/reductase family 42E, member 1
chr18	8433422	8433900	diffreps_chr18_8433421_8433900	1.1	8.39e-07	9.21e-06	Distal Intergenic	18	8544509	8557022	12514	2	123122	ENSBTAG00000018394	SDR42E1	short chain dehydrogenase/reductase family 42E, member 1
chr18	9680362	9680560	diffreps_chr18_9680361_9680560	1.96	3.31e-06	3.25e-05	Intron (NM_001035277/512302, intron 4 of 13)	18	10162336	10165586	3251	1	-481776	ENSBTAG00000053436	HSBP1	heat shock factor binding protein 1
chr19	10285742	10286240	diffreps_chr19_10285741_10286240	1.97	1.47e-13	4.68e-12	Distal Intergenic	19	10314944	10362632	47689	1	-28704	ENSBTAG00000019806	YPEL2	yippee like 2
chr19	11679742	11681340	diffreps_chr19_11679741_11681340	1.35	0	0	Downstream (1-2kb)	19	11683156	11692577	9422	2	11237	ENSBTAG00000014278	TBX2	T-box transcription factor 2
chr19	11681882	11682460	diffreps_chr19_11681881_11682460	2.18	0	0	Downstream (<1kb)	19	11683156	11692577	9422	2	10117	ENSBTAG00000014278	TBX2	T-box transcription factor 2
chr19	12707322	12707640	diffreps_chr19_12707321_12707640	1.76	1.45e-07	1.83e-06	Distal Intergenic	19	12804071	12811833	7763	2	104193	ENSBTAG00000017969	CA4	carbonic anhydrase 4
chr19	13987822	13988360	diffreps_chr19_13987821_13988360	1.21	2.54e-08	3.69e-07	Intron (NM_001192855/503581, intron 6 of 8)	19	13974398	14035433	61036	2	47073	ENSBTAG00000004710	HNF1B	HNF1 homeobox B
chr19	14253842	14254060	diffreps_chr19_14253841_14254060	1.05	0.00153787	0.00795018	Distal Intergenic	19	14300710	14302648	1939	1	-46650	ENSBTAG00000039504	WFDC18	extracellular proteinase inhibitor
chr19	14626142	14626620	diffreps_chr19_14626141_14626620	1.8	6.85e-12	1.74e-10	Exon (NM_001205642/539169, exon 5 of 6)	19	14621733	14628732	7000	1	4409	ENSBTAG00000018519	GAS2L2	growth arrest specific 2 like 2
chr19	14954582	14955060	diffreps_chr19_14954581_14955060	1.05	4.64e-07	5.33e-06	Promoter (<=1kb)	19	14954577	14963357	8781	1	5	ENSBTAG00000019094	NLE1	notchless homolog 1
chr19	15837182	15837620	diffreps_chr19_15837181_15837620	1.36	5.61e-08	7.64e-07	Distal Intergenic	19	15807708	15809743	2036	2	-27439	ENSBTAG00000014113	CCL8	chemokine (C-C motif) ligand 8
chr19	17307462	17307980	diffreps_chr19_17307461_17307980	1.13	8.23e-09	1.31e-07	Distal Intergenic	19	17287825	17300526	12702	2	-6936	ENSBTAG00000008913	TMEM98	transmembrane protein 98
chr19	18501962	18503740	diffreps_chr19_18501961_18503740	1.8	0	0	Distal Intergenic	19	18474461	18474541	81	2	-27421	ENSBTAG00000029955	MIR193A	microRNA mir-193a
chr19	18504882	18507160	diffreps_chr19_18504881_18507160	1.83	0	0	Distal Intergenic	19	18474461	18474541	81	2	-30341	ENSBTAG00000029955	MIR193A	microRNA mir-193a
chr19	19032922	19033880	diffreps_chr19_19032921_19033880	1.28	0	0	Distal Intergenic	19	18763113	18873847	110735	2	-159075	ENSBTAG00000011829	NF1	neurofibromin 1
chr19	19056602	19057220	diffreps_chr19_19056601_19057220	1.04	5.28e-09	8.67e-08	Distal Intergenic	19	18763113	18873847	110735	2	-182755	ENSBTAG00000011829	NF1	neurofibromin 1
chr19	19388022	19388640	diffreps_chr19_19388021_19388640	1.53	4.44e-16	1.93e-14	3' UTR	19	19368438	19387200	18763	1	19584	ENSBTAG00000006846	LGALS9	galectin 9
chr19	19389322	19391420	diffreps_chr19_19389321_19391420	2.2	0	0	Exon (NM_001076799/282876, exon 24 of 26)	19	19368438	19387200	18763	1	20884	ENSBTAG00000006846	LGALS9	galectin 9
chr19	19490882	19491360	diffreps_chr19_19490881_19491360	1.18	2.42e-09	4.17e-08	Exon (NM_001195029/615250, exon 3 of 4)	19	19487741	19503201	15461	2	11841	ENSBTAG00000033298	LYRM9	LYR motif containing 9
chr19	19832562	19832840	diffreps_chr19_19832561_19832840	1.19	0.000102388	0.000728463	Downstream (<1kb)	19	19833333	19841112	7780	2	8272	ENSBTAG00000008116	POLDIP2	DNA polymerase delta interacting protein 2
chr19	19963542	19964200	diffreps_chr19_19963541_19964200	1.35	4.44e-16	1.93e-14	Exon (NM_001034234/505069, exon 8 of 12)	19	19943529	19967654	24126	1	20013	ENSBTAG00000008788	SLC13A2	solute carrier family 13 member 2
chr19	20006602	20007020	diffreps_chr19_20006601_20007020	1.12	4.04e-07	4.7e-06	Downstream (2-3kb)	19	20009500	20015144	5645	2	8124	ENSBTAG00000013096	UNC119	unc-119 lipid binding chaperone
chr19	20031902	20032100	diffreps_chr19_20031901_20032100	1.16	0.00138207	0.00726558	Promoter (1-2kb)	19	20030301	20033801	3501	2	1701	ENSBTAG00000013099	ALDOC	aldolase, fructose-bisphosphate C
chr19	20169242	20170940	diffreps_chr19_20169241_20170940	2.22	0	0	3' UTR	19	20164982	20171062	6081	1	4260	ENSBTAG00000038990	TRAF4	TNF receptor associated factor 4
chr19	20181142	20181680	diffreps_chr19_20181141_20181680	1.69	1.82e-13	5.76e-12	Distal Intergenic	19	20164982	20171062	6081	1	16160	ENSBTAG00000038990	TRAF4	TNF receptor associated factor 4
chr19	20214842	20215180	diffreps_chr19_20214841_20215180	1.01	0.000374028	0.00230901	Distal Intergenic	19	20233860	20238383	4524	1	-18680	ENSBTAG00000015639	ERAL1	Era like 12S mitochondrial rRNA chaperone 1
chr19	20329702	20330220	diffreps_chr19_20329701_20330220	1.12	7.45e-10	1.39e-08	Intron (NM_001078018/539038, intron 4 of 16)	19	20277205	20317115	39911	2	-12587	ENSBTAG00000015976	PHF12	PHD finger protein 12
chr19	20474522	20476960	diffreps_chr19_20474521_20476960	1.13	0	0	Distal Intergenic	19	20406351	20419989	13639	1	68171	ENSBTAG00000007946	PIPOX	pipecolic acid and sarcosine oxidase
chr19	20483022	20484000	diffreps_chr19_20483021_20484000	2.35	0	0	Distal Intergenic	19	20406351	20419989	13639	1	76671	ENSBTAG00000007946	PIPOX	pipecolic acid and sarcosine oxidase
chr19	20562802	20563460	diffreps_chr19_20562801_20563460	1.28	5.33e-15	2.04e-13	Distal Intergenic	19	20584547	20591495	6949	1	-21087	ENSBTAG00000005352	CRYBA1	crystallin beta A1
chr19	20827802	20828380	diffreps_chr19_20827801_20828380	1.3	5.13e-11	1.14e-09	3' UTR	19	20823480	20827849	4370	1	4322	ENSBTAG00000014687	TP53I13	tumor protein p53 inducible protein 13
chr19	20833482	20835340	diffreps_chr19_20833481_20835340	1.11	0	0	Distal Intergenic	19	20823480	20827849	4370	1	10002	ENSBTAG00000014687	TP53I13	tumor protein p53 inducible protein 13
chr19	20869762	20870480	diffreps_chr19_20869761_20870480	1.33	3.06e-14	1.07e-12	Promoter (1-2kb)	19	20871847	20871918	72	2	1438	ENSBTAG00000044956	MIR2334	microRNA mir-2334
chr19	21024122	21024480	diffreps_chr19_21024121_21024480	1.13	1.91e-05	0.00016055	Distal Intergenic	19	20865346	20873587	8242	2	-150535	ENSBTAG00000001120	CORO6	coronin 6
chr19	21625782	21626080	diffreps_chr19_21625781_21626080	1.07	8.63e-05	0.000626201	Distal Intergenic	19	21603442	21620155	16714	2	-5627	ENSBTAG00000019379	TRARG1	trafficking regulator of GLUT4 (SLC2A4) 1
chr19	21642062	21642320	diffreps_chr19_21642061_21642320	1.11	0.000239995	0.00155914	Distal Intergenic	19	21603442	21620155	16714	2	-21907	ENSBTAG00000019379	TRARG1	trafficking regulator of GLUT4 (SLC2A4) 1
chr19	21764382	21764960	diffreps_chr19_21764381_21764960	1.62	7.25e-13	2.12e-11	Intron (NM_001046204/515556, intron 2 of 22)	19	21718801	21862893	144093	1	45581	ENSBTAG00000008424	ABR	ABR activator of RhoGEF and GTPase
chr19	21766962	21767820	diffreps_chr19_21766961_21767820	1.29	0	0	Intron (NM_001046204/515556, intron 2 of 22)	19	21718801	21862893	144093	1	48161	ENSBTAG00000008424	ABR	ABR activator of RhoGEF and GTPase
chr19	21769502	21770380	diffreps_chr19_21769501_21770380	1.21	0	0	Intron (NM_001046204/515556, intron 2 of 22)	19	21718801	21862893	144093	1	50701	ENSBTAG00000008424	ABR	ABR activator of RhoGEF and GTPase
chr19	22301082	22301300	diffreps_chr19_22301081_22301300	2.17	2.45e-07	2.98e-06	Promoter (<=1kb)	19	22301403	22440867	139465	1	-103	ENSBTAG00000039819	RPH3AL	rabphilin 3A like (without C2 domains)
chr19	22656602	22656820	diffreps_chr19_22656601_22656820	2.21	1.34e-07	1.7e-06	Intron (NM_001046582/616550, intron 9 of 11)	19	22622694	22641595	18902	2	-15007	ENSBTAG00000011479	INPP5K	inositol polyphosphate-5-phosphatase K
chr19	22690142	22690760	diffreps_chr19_22690141_22690760	1.36	3.55e-15	1.39e-13	3' UTR	19	22644897	22678492	33596	2	-11650	ENSBTAG00000011480	PITPNA	phosphatidylinositol transfer protein alpha
chr19	22730402	22730880	diffreps_chr19_22730401_22730880	1.47	1.07e-09	1.96e-08	Promoter (<=1kb)	19	22690661	22730143	39483	2	-259	ENSBTAG00000011482	SLC43A2	solute carrier family 43 member 2
chr19	22751442	22752420	diffreps_chr19_22751441_22752420	1.53	0	0	Downstream (1-2kb)	19	22690661	22730143	39483	2	-21299	ENSBTAG00000011482	SLC43A2	solute carrier family 43 member 2
chr19	22816542	22817100	diffreps_chr19_22816541_22817100	1.23	1.14e-10	2.41e-09	Distal Intergenic	19	22811568	22811652	85	2	-4890	ENSBTAG00000029930	MIR22	microRNA mir-22
chr19	22954802	22955000	diffreps_chr19_22954801_22955000	1.6	5.5e-05	0.000417991	Distal Intergenic	19	22900174	22946581	46408	1	54628	ENSBTAG00000009711	RPA1	replication protein A1
chr19	23074682	23075160	diffreps_chr19_23074681_23075160	1.6	4.95e-10	9.43e-09	Distal Intergenic	19	23071137	23071247	111	2	-3435	ENSBTAG00000036391	MIR212	microRNA mir-212
chr19	23078422	23078960	diffreps_chr19_23078421_23078960	1.5	4.02e-13	1.22e-11	Downstream (1-2kb)	19	23071137	23071247	111	2	-7175	ENSBTAG00000036391	MIR212	microRNA mir-212
chr19	23703902	23704680	diffreps_chr19_23703901_23704680	1.56	0	0	Distal Intergenic	19	23513490	23581162	67673	1	190412	ENSBTAG00000016806	PAFAH1B1	platelet activating factor acetylhydrolase 1b regulatory subunit 1
chr19	23846822	23847060	diffreps_chr19_23846821_23847060	1.07	0.000513977	0.00305949	Distal Intergenic	19	24139174	24140118	945	2	293058	ENSBTAG00000054200	OR1E2B	olfactory receptor family 1 subfamily E member 2B
chr19	24345882	24346460	diffreps_chr19_24345881_24346460	1.14	1.21e-10	2.56e-09	Intron (NM_001102264/613527, intron 2 of 10)	19	24340201	24360351	20151	1	5681	ENSBTAG00000000831	CTNS	cystinosin, lysosomal cystine transporter
chr19	24374882	24375260	diffreps_chr19_24374881_24375260	1.89	1.79e-10	3.66e-09	Intron (NM_001304573/338035, intron 10 of 11)	19	24368861	24384507	15647	2	9247	ENSBTAG00000015258	P2RX5	purinergic receptor P2X 5
chr19	24495842	24497640	diffreps_chr19_24495841_24497640	1.04	0	0	Intron (NM_001192251/510260, intron 15 of 15)	19	24494920	24523050	28131	2	25410	ENSBTAG00000007166	CAMKK1	calcium/calmodulin dependent protein kinase kinase 1
chr19	24543242	24543700	diffreps_chr19_24543241_24543700	1.5	2.87e-10	5.7e-09	Intron (NM_001205800/514898, intron 1 of 11)	19	24528709	24545951	17243	2	2251	ENSBTAG00000007169	P2RX1	purinergic receptor P2X 1
chr19	24616242	24616820	diffreps_chr19_24616241_24616820	1.02	1.66e-11	3.97e-10	Downstream (<1kb)	19	24551813	24585890	34078	2	-30352	ENSBTAG00000014806	ATP2A3	ATPase sarcoplasmic/endoplasmic reticulum Ca2+ transporting 3
chr19	24922082	24922360	diffreps_chr19_24922081_24922360	3.18	1.22e-12	3.45e-11	Distal Intergenic	19	24797190	24884781	87592	2	-37301	ENSBTAG00000014433	UBE2G1	ubiquitin conjugating enzyme E2 G1
chr19	25044442	25045320	diffreps_chr19_25044441_25045320	1.39	0	0	Promoter (<=1kb)	19	25040646	25043546	2901	2	-896	ENSBTAG00000007436	GGT6	gamma-glutamyltransferase 6
chr19	25080262	25080500	diffreps_chr19_25080261_25080500	2.2	5.35e-08	7.31e-07	Distal Intergenic	19	25055641	25071385	15745	2	-8877	ENSBTAG00000007437	TEKT1	tektin 1
chr19	25421582	25422140	diffreps_chr19_25421581_25422140	1.09	9.48e-09	1.49e-07	Promoter (<=1kb)	19	25422472	25431855	9384	1	-332	ENSBTAG00000008318	AIPL1	aryl hydrocarbon receptor interacting protein like 1
chr19	26274802	26275120	diffreps_chr19_26274801_26275120	2.91	4.82e-13	1.45e-11	Distal Intergenic	19	26149862	26246571	96710	2	-28231	ENSBTAG00000011505	RABEP1	rabaptin, RAB GTPase binding effector protein 1
chr19	26387182	26387860	diffreps_chr19_26387181_26387860	1.67	0	0	Downstream (2-3kb)	19	26390125	26409999	19875	2	22139	ENSBTAG00000001349	KIF1C	kinesin family member 1C
chr19	26422722	26423220	diffreps_chr19_26422721_26423220	1.28	1.2e-10	2.52e-09	Exon (NM_001255972/100859923, exon 8 of 23)	19	26418989	26434463	15475	1	3733	ENSBTAG00000008591	CAMTA2	calmodulin binding transcription activator 2
chr19	26423662	26424020	diffreps_chr19_26423661_26424020	4.01	0	0	Exon (NM_001255972/100859923, exon 9 of 23)	19	26418989	26434463	15475	1	4673	ENSBTAG00000008591	CAMTA2	calmodulin binding transcription activator 2
chr19	26483462	26484020	diffreps_chr19_26483461_26484020	1.29	9.97e-10	1.82e-08	Promoter (<=1kb)	19	26484749	26489324	4576	1	-729	ENSBTAG00000004908	CHRNE	cholinergic receptor nicotinic epsilon subunit
chr19	26497582	26498240	diffreps_chr19_26497581_26498240	1.23	0	0	Exon (NM_001099376/519558, exon 13 of 32)	19	26487421	26488183	763	2	-9399	ENSBTAG00000047992	C19H17orf107	chromosome 19 C17orf107 homolog
chr19	26574042	26574560	diffreps_chr19_26574041_26574560	1.23	9.18e-10	1.68e-08	Downstream (2-3kb)	19	26564855	26567068	2214	2	-6974	ENSBTAG00000013390	PSMB6	proteasome 20S subunit beta 6
chr19	26826242	26827300	diffreps_chr19_26826241_26827300	1.21	0	0	Distal Intergenic	19	26821869	26825361	3493	1	4373	ENSBTAG00000020853	SLC16A13	solute carrier family 16 member 13
chr19	26828122	26828400	diffreps_chr19_26828121_26828400	2.34	1.14e-08	1.76e-07	Distal Intergenic	19	26821869	26825361	3493	1	6253	ENSBTAG00000020853	SLC16A13	solute carrier family 16 member 13
chr19	26871242	26871520	diffreps_chr19_26871241_26871520	1.99	3.28e-08	4.65e-07	Distal Intergenic	19	26856752	26866730	9979	2	-4512	ENSBTAG00000025101	ASGR2	asialoglycoprotein receptor 2
chr19	27314082	27315600	diffreps_chr19_27314081_27315600	1.09	0	0	Promoter (<=1kb)	19	27315832	27319227	3396	1	-232	ENSBTAG00000000134	MPDU1	mannose-P-dolichol utilization defect 1
chr19	27343842	27344820	diffreps_chr19_27343841_27344820	1.14	1.11e-16	5.11e-15	Promoter (1-2kb)	19	27344312	27345970	1659	2	1150	ENSBTAG00000004222	SAT2	spermidine/spermine N1-acetyltransferase family member 2
chr19	27442562	27442780	diffreps_chr19_27442561_27442780	1.82	3.39e-06	3.32e-05	Exon (NM_001191249/789044, exon 11 of 85)	19	27416681	27523393	106713	1	25881	ENSBTAG00000008605	DNAH2	dynein axonemal heavy chain 2
chr19	27508062	27508600	diffreps_chr19_27508061_27508600	4.01	0	0	Intron (NM_001191249/789044, intron 71 of 84)	19	27545968	27546947	980	1	-37368	ENSBTAG00000014693	TMEM88	transmembrane protein 88
chr19	27509022	27509300	diffreps_chr19_27509021_27509300	3.46	3.24e-14	1.13e-12	Intron (NM_001191249/789044, intron 72 of 84)	19	27545968	27546947	980	1	-36668	ENSBTAG00000014693	TMEM88	transmembrane protein 88
chr19	27542942	27543660	diffreps_chr19_27542941_27543660	1.08	5.92e-14	2e-12	Distal Intergenic	19	27545968	27546947	980	1	-2308	ENSBTAG00000014693	TMEM88	transmembrane protein 88
chr19	27552602	27553220	diffreps_chr19_27552601_27553220	1.08	7.73e-11	1.69e-09	3' UTR	19	27548918	27552991	4074	1	3684	ENSBTAG00000051958	CYB5D1	cytochrome b5 domain containing 1
chr19	27643282	27643480	diffreps_chr19_27643281_27643480	2.63	1.63e-08	2.44e-07	Distal Intergenic	19	27662514	27676986	14473	1	-19034	ENSBTAG00000008773	GUCY2D	guanylate cyclase 2D, retinal
chr19	27643862	27644140	diffreps_chr19_27643861_27644140	3.07	1.16e-12	3.31e-11	Distal Intergenic	19	27662514	27676986	14473	1	-18374	ENSBTAG00000008773	GUCY2D	guanylate cyclase 2D, retinal
chr19	27723162	27725120	diffreps_chr19_27723161_27725120	1.33	0	0	Exon (NM_001192038/504803, exon 4 of 15)	19	27718255	27729753	11499	2	4633	ENSBTAG00000012475	ALOX12B	arachidonate 12-lipoxygenase, 12R type
chr19	27735182	27735600	diffreps_chr19_27735181_27735600	1.16	2.51e-07	3.03e-06	Distal Intergenic	19	27718255	27729753	11499	2	-5429	ENSBTAG00000012475	ALOX12B	arachidonate 12-lipoxygenase, 12R type
chr19	28268462	28269140	diffreps_chr19_28268461_28269140	1.15	6.25e-13	1.85e-11	Promoter (1-2kb)	19	28254549	28267354	12806	2	-1108	ENSBTAG00000018416	CCDC42	coiled-coil domain containing 42
chr19	28365782	28366160	diffreps_chr19_28365781_28366160	1.21	6.25e-07	7e-06	Distal Intergenic	19	28294815	28342739	47925	2	-23043	ENSBTAG00000016344	PIK3R6	phosphoinositide-3-kinase regulatory subunit 6
chr19	28946402	28946740	diffreps_chr19_28946401_28946740	1.46	3.45e-07	4.06e-06	Distal Intergenic	19	28955391	28968715	13325	2	21975	ENSBTAG00000005048	DHRS7C	dehydrogenase/reductase 7C
chr19	29280842	29282000	diffreps_chr19_29280841_29282000	1.08	0	0	Distal Intergenic	19	29045831	29251113	205283	2	-29729	ENSBTAG00000019107	GAS7	growth arrest specific 7
chr19	29614362	29614620	diffreps_chr19_29614361_29614620	1.71	3.2e-06	3.15e-05	Exon (NM_001101835/281338, exon 12 of 43)	19	29601526	29622481	20956	2	7861	ENSBTAG00000011803	MYH3	myosin heavy chain 3
chr19	33038902	33039380	diffreps_chr19_33038901_33039380	1.14	1.32e-07	1.68e-06	Distal Intergenic	19	33072171	33086902	14732	1	-32791	ENSBTAG00000000943	ZNF286A	zinc finger protein 286A
chr19	33580862	33581620	diffreps_chr19_33580861_33581620	1.45	0	0	Distal Intergenic	19	33482084	33502631	20548	2	-78231	ENSBTAG00000007581	ADORA2B	adenosine A2b receptor
chr19	33864962	33865900	diffreps_chr19_33864961_33865900	1.27	0	0	Distal Intergenic	19	33880141	33886171	6031	1	-14241	ENSBTAG00000021113	ALDH3A1	aldehyde dehydrogenase 3 family member A1
chr19	33902202	33903300	diffreps_chr19_33902201_33903300	1.12	0	0	Promoter (1-2kb)	19	33900739	33918122	17384	1	1463	ENSBTAG00000038548	SLC47A2	solute carrier family 47 member 2
chr19	34024382	34025600	diffreps_chr19_34024381_34025600	1.32	0	0	Distal Intergenic	19	34063775	34069266	5492	2	43666	ENSBTAG00000000540	RNF112	ring finger protein 112
chr19	34100962	34101180	diffreps_chr19_34100961_34101180	2.14	4.48e-07	5.16e-06	Distal Intergenic	19	34106759	34115097	8339	1	-5579	ENSBTAG00000017790	B9D1	B9 domain containing 1
chr19	34102022	34102380	diffreps_chr19_34102021_34102380	3.4	0	0	Distal Intergenic	19	34106759	34115097	8339	1	-4379	ENSBTAG00000017790	B9D1	B9 domain containing 1
chr19	34180062	34181500	diffreps_chr19_34180061_34181500	1.06	0	0	Distal Intergenic	19	34117296	34168722	51427	2	-11340	ENSBTAG00000017771	EPN2	epsin 2
chr19	34205322	34207860	diffreps_chr19_34205321_34207860	1.54	0	0	Intron (NM_001102173/534491, intron 3 of 4)	19	34193708	34214701	20994	1	11614	ENSBTAG00000003707	GRAP	GRB2-related adaptor protein
chr19	34263442	34265760	diffreps_chr19_34263441_34265760	1.46	0	0	Exon (NM_001001442/407227, exon 5 of 15)	19	34214711	34269734	55024	2	3974	ENSBTAG00000003700	SLC5A10	solute carrier family 5 member 10
chr19	34528642	34528920	diffreps_chr19_34528641_34528920	1.73	1.29e-06	1.37e-05	Intron (NM_001075623/513521, intron 1 of 7)	19	34524373	34536012	11640	1	4269	ENSBTAG00000008801	ATPAF2	ATP synthase mitochondrial F1 complex assembly factor 2
chr19	34586642	34586940	diffreps_chr19_34586641_34586940	1.04	0.00052487	0.00311537	Intron (NM_001099154/616315, intron 1 of 11)	19	34556907	34627380	70474	1	29735	ENSBTAG00000003983	TOM1L2	target of myb1 like 2 membrane trafficking protein
chr19	34647882	34648760	diffreps_chr19_34647881_34648760	1.4	0	0	Promoter (<=1kb)	19	34647548	34647641	94	1	334	ENSBTAG00000036437	MIR33B	microRNA mir-33b
chr19	34652802	34653320	diffreps_chr19_34652801_34653320	1.31	1.61e-08	2.42e-07	Distal Intergenic	19	34647548	34647641	94	1	5254	ENSBTAG00000036437	MIR33B	microRNA mir-33b
chr19	34753282	34754380	diffreps_chr19_34753281_34754380	1.64	0	0	Distal Intergenic	19	34785711	34816445	30735	1	-31331	ENSBTAG00000016432	PEMT	phosphatidylethanolamine N-methyltransferase
chr19	34768082	34769980	diffreps_chr19_34768081_34769980	1.04	0	0	Distal Intergenic	19	34785711	34816445	30735	1	-15731	ENSBTAG00000016432	PEMT	phosphatidylethanolamine N-methyltransferase
chr19	35114562	35115160	diffreps_chr19_35114561_35115160	1.79	0	0	Distal Intergenic	19	35124085	35142701	18617	2	27541	ENSBTAG00000008978	USP22	ubiquitin specific peptidase 22
chr19	35251882	35252720	diffreps_chr19_35251881_35252720	1.52	0	0	Distal Intergenic	19	35255910	35273733	17824	1	-3190	ENSBTAG00000010576	MAP2K3	mitogen-activated protein kinase kinase 3
chr19	35274822	35275220	diffreps_chr19_35274821_35275220	1.12	1.15e-06	1.22e-05	Distal Intergenic	19	35255910	35273733	17824	1	18912	ENSBTAG00000010576	MAP2K3	mitogen-activated protein kinase kinase 3
chr19	35348182	35348920	diffreps_chr19_35348181_35348920	1.11	9.1e-15	3.39e-13	Intron (NM_001024690/538479, intron 1 of 2)	19	35328653	35363137	34485	1	19529	ENSBTAG00000020061	KCNJ12	potassium inwardly rectifying channel subfamily J member 12
chr19	35907182	35907800	diffreps_chr19_35907181_35907800	1.12	1.18e-11	2.9e-10	3' UTR	19	35907559	35913414	5856	2	5614	ENSBTAG00000000731	WFIKKN2	WAP, follistatin/kazal, immunoglobulin, kunitz and netrin domain containing 2
chr19	35959942	35960280	diffreps_chr19_35959941_35960280	3.09	1.89e-15	7.68e-14	Distal Intergenic	19	35981207	35987327	6121	1	-20927	ENSBTAG00000025183	ANKRD40CL	ANKRD40 C-terminal like
chr19	36179302	36179660	diffreps_chr19_36179301_36179660	1.06	4.3e-05	0.000334418	Promoter (<=1kb)	19	36171017	36179015	7999	2	-287	ENSBTAG00000004155	SPATA20	spermatogenesis associated 20
chr19	36235962	36236700	diffreps_chr19_36235961_36236700	1.12	7.77e-16	3.31e-14	Exon (NM_001098136/615755, exon 4 of 10)	19	36230418	36240063	9646	2	3363	ENSBTAG00000021303	RSAD1	radical S-adenosyl methionine domain containing 1
chr19	36364242	36364600	diffreps_chr19_36364241_36364600	2.89	6.22e-15	2.37e-13	Distal Intergenic	19	36390060	36395906	5847	2	31306	ENSBTAG00000054481	TMEM92	transmembrane protein 92
chr19	36489002	36489440	diffreps_chr19_36489001_36489440	1.22	3.45e-08	4.88e-07	Exon (NM_001013402/541308, exon 6 of 10)	19	36482942	36491815	8874	2	2375	ENSBTAG00000003956	SGCA	sarcoglycan alpha
chr19	36517562	36518300	diffreps_chr19_36517561_36518300	1.95	0	0	Distal Intergenic	19	36526611	36543423	16813	1	-8311	ENSBTAG00000040521	SAMD14	sterile alpha motif domain containing 14
chr19	36573862	36574360	diffreps_chr19_36573861_36574360	1.41	3.41e-10	6.68e-09	Exon (NM_001302664/508490, exon 22 of 26)	19	36544866	36561135	16270	2	-12727	ENSBTAG00000008744	PDK2	pyruvate dehydrogenase kinase 2
chr19	36630182	36630380	diffreps_chr19_36630181_36630380	3.18	7.66e-10	1.41e-08	Distal Intergenic	19	36565805	36598451	32647	2	-31731	ENSBTAG00000019498	ITGA3	integrin subunit alpha 3
chr19	36658582	36659160	diffreps_chr19_36658581_36659160	1.36	1.31e-12	3.7e-11	Distal Intergenic	19	36662426	36667620	5195	1	-3266	ENSBTAG00000017409	DLX3	distal-less homeobox 3
chr19	36659262	36660920	diffreps_chr19_36659261_36660920	1.08	0	0	Promoter (1-2kb)	19	36662426	36667620	5195	1	-1506	ENSBTAG00000017409	DLX3	distal-less homeobox 3
chr19	36700002	36700540	diffreps_chr19_36700001_36700540	3.82	0	0	Distal Intergenic	19	36682225	36687807	5583	2	-12195	ENSBTAG00000007353	DLX4	distal-less homeobox 4
chr19	36785122	36786660	diffreps_chr19_36785121_36786660	1.11	0	0	Distal Intergenic	19	36811896	36846612	34717	2	59952	ENSBTAG00000018699	KAT7	lysine acetyltransferase 7
chr19	36912942	36913360	diffreps_chr19_36912941_36913360	1.22	1.44e-07	1.82e-06	Promoter (<=1kb)	19	36913916	36920744	6829	1	-556	ENSBTAG00000006881	SLC35B1	solute carrier family 35 member B1
chr19	36924882	36925400	diffreps_chr19_36924881_36925400	1.1	7.29e-08	9.74e-07	Distal Intergenic	19	36913916	36920744	6829	1	10966	ENSBTAG00000006881	SLC35B1	solute carrier family 35 member B1
chr19	37046722	37047440	diffreps_chr19_37046721_37047440	1.63	0	0	Distal Intergenic	19	37037404	37041810	4407	2	-4912	ENSBTAG00000015293	NXPH3	neurexophilin 3
chr19	37055842	37056060	diffreps_chr19_37055841_37056060	1.13	0.000987461	0.00541716	Distal Intergenic	19	37037404	37041810	4407	2	-14032	ENSBTAG00000015293	NXPH3	neurexophilin 3
chr19	37056762	37057220	diffreps_chr19_37056761_37057220	1.47	1.58e-09	2.78e-08	Distal Intergenic	19	37037404	37041810	4407	2	-14952	ENSBTAG00000015293	NXPH3	neurexophilin 3
chr19	37214682	37215020	diffreps_chr19_37214681_37215020	1.05	6.19e-05	0.00046439	Distal Intergenic	19	37195939	37206556	10618	1	18743	ENSBTAG00000017120	PHB	prohibitin
chr19	37347322	37347700	diffreps_chr19_37347321_37347700	1.21	3.05e-07	3.63e-06	Intron (NM_001193119/524639, intron 2 of 3)	19	37344874	37351524	6651	1	2448	ENSBTAG00000000033	PHOSPHO1	phosphoethanolamine/phosphocholine phosphatase 1
chr19	37350042	37351740	diffreps_chr19_37350041_37351740	1.11	0	0	3' UTR	19	37344874	37351524	6651	1	5168	ENSBTAG00000000033	PHOSPHO1	phosphoethanolamine/phosphocholine phosphatase 1
chr19	37664702	37665240	diffreps_chr19_37664701_37665240	1.06	9.09e-10	1.67e-08	Distal Intergenic	19	37678762	37694907	16146	2	29667	ENSBTAG00000007935	CALCOCO2	calcium binding and coiled-coil domain 2
chr19	37874102	37874420	diffreps_chr19_37874101_37874420	1.11	1.98e-05	0.000166079	Distal Intergenic	19	37866983	37870934	3952	1	7119	ENSBTAG00000054623	HOXB9	homeobox B9
chr19	38368182	38368540	diffreps_chr19_38368181_38368540	1.08	5.03e-06	4.77e-05	Distal Intergenic	19	38376398	38384920	8523	2	16380	ENSBTAG00000020321	SNX11	sorting nexin 11
chr19	38381862	38382220	diffreps_chr19_38381861_38382220	1.59	8.92e-08	1.17e-06	Intron (NM_001076904/534567, intron 1 of 6)	19	38376398	38384920	8523	2	2700	ENSBTAG00000020321	SNX11	sorting nexin 11
chr19	38517942	38518760	diffreps_chr19_38517941_38518760	1.17	0	0	Downstream (1-2kb)	19	38511036	38516493	5458	1	6906	ENSBTAG00000012249	PRR15L	proline rich 15 like
chr19	38578582	38579720	diffreps_chr19_38578581_38579720	1.4	0	0	Distal Intergenic	19	38533720	38565114	31395	2	-13468	ENSBTAG00000013740	SP2	Sp2 transcription factor
chr19	38580462	38581020	diffreps_chr19_38580461_38581020	3.06	0	0	Distal Intergenic	19	38533720	38565114	31395	2	-15348	ENSBTAG00000013740	SP2	Sp2 transcription factor
chr19	38621062	38621640	diffreps_chr19_38621061_38621640	3.67	0	0	Promoter (1-2kb)	19	38623127	38626863	3737	1	-1487	ENSBTAG00000001828	SCRN2	secernin 2
chr19	38654842	38655500	diffreps_chr19_38654841_38655500	1.04	1.36e-09	2.43e-08	Distal Intergenic	19	38639481	38651271	11791	1	15361	ENSBTAG00000013523	OSBPL7	oxysterol binding protein like 7
chr19	38657622	38658280	diffreps_chr19_38657621_38658280	1.34	5.52e-14	1.88e-12	Distal Intergenic	19	38639481	38651271	11791	1	18141	ENSBTAG00000013523	OSBPL7	oxysterol binding protein like 7
chr19	38758762	38759020	diffreps_chr19_38758761_38759020	3.18	1.22e-12	3.45e-11	Distal Intergenic	19	38715293	38727078	11786	2	-31684	ENSBTAG00000014199	TBX21	T-box transcription factor 21
chr19	39059442	39060480	diffreps_chr19_39059441_39060480	1.68	0	0	Distal Intergenic	19	39011378	39036059	24682	1	48064	ENSBTAG00000008535	SOCS7	suppressor of cytokine signaling 7
chr19	39060582	39061560	diffreps_chr19_39060581_39061560	1.27	0	0	Distal Intergenic	19	39011378	39036059	24682	1	49204	ENSBTAG00000008535	SOCS7	suppressor of cytokine signaling 7
chr19	39117582	39118040	diffreps_chr19_39117581_39118040	1.15	1.36e-09	2.43e-08	Distal Intergenic	19	39011378	39036059	24682	1	106204	ENSBTAG00000008535	SOCS7	suppressor of cytokine signaling 7
chr19	39328462	39329700	diffreps_chr19_39328461_39329700	1.63	0	0	3' UTR	19	39328390	39333418	5029	2	3718	ENSBTAG00000011539	PCGF2	polycomb group ring finger 2
chr19	39673522	39674540	diffreps_chr19_39673521_39674540	1.58	0	0	3' UTR	19	39590715	39657241	66527	2	-16281	ENSBTAG00000019347	PLXDC1	plexin domain containing 1
chr19	39731682	39733600	diffreps_chr19_39731681_39733600	1.24	0	0	Distal Intergenic	19	39694197	39697795	3599	1	37485	ENSBTAG00000002060	RPL19	ribosomal protein L19
chr19	40001822	40003780	diffreps_chr19_40001821_40003780	1.07	0	0	Distal Intergenic	19	40006493	40015037	8545	1	-2713	ENSBTAG00000006035	PPP1R1B	protein phosphatase 1 regulatory inhibitor subunit 1B
chr19	40047662	40048220	diffreps_chr19_40047661_40048220	1.17	2.17e-10	4.38e-09	3' UTR	19	40044842	40046528	1687	1	2820	ENSBTAG00000011731	PNMT	phenylethanolamine N-methyltransferase
chr19	40048882	40049220	diffreps_chr19_40048881_40049220	2.91	3.11e-15	1.23e-13	Exon (NM_001105363/513258, exon 7 of 8)	19	40044842	40046528	1687	1	4040	ENSBTAG00000011731	PNMT	phenylethanolamine N-methyltransferase
chr19	40328522	40329260	diffreps_chr19_40328521_40329260	1.29	0	0	Promoter (1-2kb)	19	40330599	40332909	2311	1	-1339	ENSBTAG00000021462	CSF3	colony stimulating factor 3
chr19	40341182	40341940	diffreps_chr19_40341181_40341940	1.22	1.11e-16	5.11e-15	Distal Intergenic	19	40330599	40332909	2311	1	10583	ENSBTAG00000021462	CSF3	colony stimulating factor 3
chr19	40377742	40378660	diffreps_chr19_40377741_40378660	1.11	0	0	Intron (NM_001046329/532621, intron 2 of 9)	19	40366180	40390931	24752	1	11562	ENSBTAG00000010745	THRA	thyroid hormone receptor alpha
chr19	40409602	40410020	diffreps_chr19_40409601_40410020	1.58	1.19e-09	2.14e-08	Distal Intergenic	19	40389831	40397513	7683	2	-12089	ENSBTAG00000012178	NR1D1	nuclear receptor subfamily 1 group D member 1
chr19	40534722	40535160	diffreps_chr19_40534721_40535160	1.08	5.03e-06	4.77e-05	Promoter (<=1kb)	19	40535097	40546070	10974	1	0	ENSBTAG00000010384	CDC6	cell division cycle 6
chr19	40535262	40535500	diffreps_chr19_40535261_40535500	1.98	2.07e-07	2.55e-06	Promoter (<=1kb)	19	40535097	40546070	10974	1	165	ENSBTAG00000010384	CDC6	cell division cycle 6
chr19	40537042	40537640	diffreps_chr19_40537041_40537640	1.41	4.16e-13	1.26e-11	Promoter (1-2kb)	19	40535097	40546070	10974	1	1945	ENSBTAG00000010384	CDC6	cell division cycle 6
chr19	40575182	40575680	diffreps_chr19_40575181_40575680	1.33	4.88e-09	8.05e-08	Intron (NM_001014942/534280, intron 2 of 8)	19	40560016	40595283	35268	1	15166	ENSBTAG00000012500	RARA	retinoic acid receptor alpha
chr19	40592762	40593940	diffreps_chr19_40592761_40593940	1.05	0	0	Exon (NM_001014942/534280, exon 8 of 9)	19	40560016	40595283	35268	1	32746	ENSBTAG00000012500	RARA	retinoic acid receptor alpha
chr19	40596402	40596780	diffreps_chr19_40596401_40596780	1.12	1.15e-06	1.22e-05	Distal Intergenic	19	40560016	40595283	35268	1	36386	ENSBTAG00000012500	RARA	retinoic acid receptor alpha
chr19	40697602	40698060	diffreps_chr19_40697601_40698060	1.95	2.56e-13	8.03e-12	3' UTR	19	40696961	40716362	19402	2	18302	ENSBTAG00000007958	TNS4	tensin 4
chr19	40781182	40781740	diffreps_chr19_40781181_40781740	1.78	1.27e-13	4.09e-12	Intron (NM_001024930/510668, intron 1 of 2)	19	40775265	40786420	11156	2	4680	ENSBTAG00000015133	CCR7	C-C motif chemokine receptor 7
chr19	41758742	41759240	diffreps_chr19_41758741_41759240	1.3	2.81e-09	4.8e-08	Distal Intergenic	19	41731623	41735456	3834	2	-23286	ENSBTAG00000004905	KRT19	keratin 19
chr19	41789802	41790540	diffreps_chr19_41789801_41790540	1.69	0	0	Downstream (1-2kb)	19	41792379	41796743	4365	2	6203	ENSBTAG00000007583	KRT14	keratin 14
chr19	41860522	41860760	diffreps_chr19_41860521_41860760	1.22	0.000417887	0.00254873	Distal Intergenic	19	41834622	41846161	11540	2	-14361	ENSBTAG00000006806	KRT17	keratin 17
chr19	41877482	41878220	diffreps_chr19_41877481_41878220	1.08	2.22e-16	9.84e-15	Distal Intergenic	19	41907220	41909777	2558	1	-29000	ENSBTAG00000002282	EIF1	eukaryotic translation initiation factor 1
chr19	41953422	41953940	diffreps_chr19_41953421_41953940	1.08	1.92e-08	2.85e-07	Distal Intergenic	19	41926788	41929100	2313	1	26634	ENSBTAG00000017663	GAST	gastrin
chr19	41998062	41999000	diffreps_chr19_41998061_41999000	1.37	0	0	Distal Intergenic	19	42006082	42014015	7934	1	-7082	ENSBTAG00000011454	FKBP10	FKBP prolyl isomerase 10
chr19	42175022	42175880	diffreps_chr19_42175021_42175880	1.61	0	0	3' UTR	19	42171827	42176020	4194	1	3195	ENSBTAG00000002657	NKIRAS2	NFKB inhibitor interacting Ras like 2
chr19	42190362	42190660	diffreps_chr19_42190361_42190660	1.62	1.32e-06	1.39e-05	Distal Intergenic	19	42171827	42176020	4194	1	18535	ENSBTAG00000002657	NKIRAS2	NFKB inhibitor interacting Ras like 2
chr19	42250942	42251260	diffreps_chr19_42250941_42251260	1.12	2.76e-05	0.000224528	Distal Intergenic	19	42237043	42247289	10247	2	-3653	ENSBTAG00000046580	DHX58	DExH-box helicase 58
chr19	42256902	42258260	diffreps_chr19_42256901_42258260	1.97	0	0	Promoter (<=1kb)	19	42257571	42258088	518	1	0	ENSBTAG00000024979	HSPB9	heat shock protein family B (small) member 9
chr19	42509682	42510020	diffreps_chr19_42509681_42510020	1.86	6.77e-09	1.09e-07	Exon (NM_001111103/538457, exon 2 of 2)	19	42507157	42521839	14683	2	11819	ENSBTAG00000039684	CAVIN1	caveolae associated protein 1
chr19	42510102	42511280	diffreps_chr19_42510101_42511280	1.01	0	0	Exon (NM_001111103/538457, exon 2 of 2)	19	42507157	42521839	14683	2	10559	ENSBTAG00000039684	CAVIN1	caveolae associated protein 1
chr19	42610322	42610780	diffreps_chr19_42610321_42610780	1.44	4e-10	7.73e-09	3' UTR	19	42618490	42625470	6981	1	-7710	ENSBTAG00000047956	NAGLU	N-acetyl-alpha-glucosaminidase
chr19	42643802	42645160	diffreps_chr19_42643801_42645160	1.04	0	0	Promoter (<=1kb)	19	42643523	42650621	7099	1	279	ENSBTAG00000046670	MLX	MAX dimerization protein MLX
chr19	42737382	42738360	diffreps_chr19_42737381_42738360	1.01	0	0	Promoter (<=1kb)	19	42736941	42738908	1968	2	548	ENSBTAG00000019095	CCR10	C-C motif chemokine receptor 10
chr19	43225422	43227620	diffreps_chr19_43225421_43227620	1.39	0	0	Distal Intergenic	19	43169643	43176486	6844	1	55779	ENSBTAG00000006801	TMEM106A	transmembrane protein 106A
chr19	43312622	43313600	diffreps_chr19_43312621_43313600	1.11	0	0	Distal Intergenic	19	43342402	43344320	1919	1	-28802	ENSBTAG00000016847	ARL4D	ADP ribosylation factor like GTPase 4D
chr19	43322462	43323860	diffreps_chr19_43322461_43323860	1.99	0	0	Distal Intergenic	19	43342402	43344320	1919	1	-18542	ENSBTAG00000016847	ARL4D	ADP ribosylation factor like GTPase 4D
chr19	43496022	43496220	diffreps_chr19_43496021_43496220	2.1	8.12e-07	8.93e-06	Distal Intergenic	19	43548087	43566761	18675	2	70541	ENSBTAG00000015751	MEOX1	mesenchyme homeobox 1
chr19	43496482	43497040	diffreps_chr19_43496481_43497040	1.22	2.86e-11	6.65e-10	Distal Intergenic	19	43548087	43566761	18675	2	69721	ENSBTAG00000015751	MEOX1	mesenchyme homeobox 1
chr19	43577482	43577900	diffreps_chr19_43577481_43577900	2.8	0	0	Distal Intergenic	19	43548087	43566761	18675	2	-10721	ENSBTAG00000015751	MEOX1	mesenchyme homeobox 1
chr19	43578722	43579980	diffreps_chr19_43578721_43579980	1.44	0	0	Distal Intergenic	19	43548087	43566761	18675	2	-11961	ENSBTAG00000015751	MEOX1	mesenchyme homeobox 1
[truncated: 5,508 more rows]

## Sheet: TableS3
Table S3. Enriched gene ontology (GO) terms (FDR < 0.05) for genes associated with after weaning differentially induced CTCF regions for Biological process (BP).
[truncated: 750 more rows]

[truncated: 10 more sheets: TableS4, TableS5, TableS6, TableS7, TableS8, TableS9, TableS10, TableS11, TableS12, TableS13]
